# Supplementary material for: Explanation and prediction of the selective crystallization of boscalid by mid-frequency Raman difference spectroscopy analysis
Source: Royal Society of Chemistry journal article supplement (doi:10.1039/d2ce01679f), 2023-01-01
Supplement: d2ce01679f1.pdf [file d2ce01679f1.pdf]

**Electronic Supplementary Information for**

# Explanation and Prediction for the Selective Crystallization of Boscalid by Mid-Frequency Raman Difference Spectra Analysis

Yingjie Fan,<sup>a,b</sup> Chengfeng Liang,<sup>b</sup> Yanping Li,<sup>b</sup> Wangchuan Xiao,<sup>b</sup> Yu Niu,<sup>b</sup> Hongjun Jin,<sup>a</sup>

Rongrong Xue,<sup>\*b</sup> and Fenghua Chen<sup>\*b</sup>

<sup>a</sup> College of Environmental and Resource Sciences, Fujian Normal University, Fuzhou 350007, Fujian, China.

<sup>b</sup> School of Resources and Chemical Engineering, Sanming University, Sanming 365004, Fujian, China.

---

*Corresponding Authors*

*\*(R. X.) E-mail: rongrongxue@fjismu.edu.cn.*

*\*(F. C.) E-mail: fenghuachen@fjismu.edu.cn.*

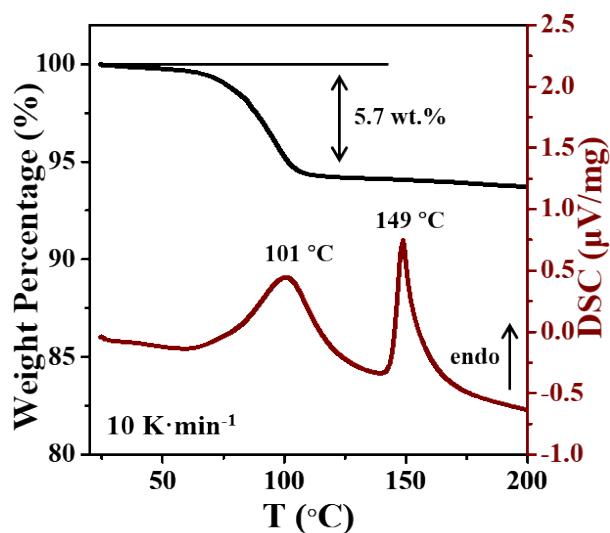

**Figure S1.** Thermogravimetry-differential scanning calorimetry analysis (TGA-DSC) curve of BOS monohydrate.

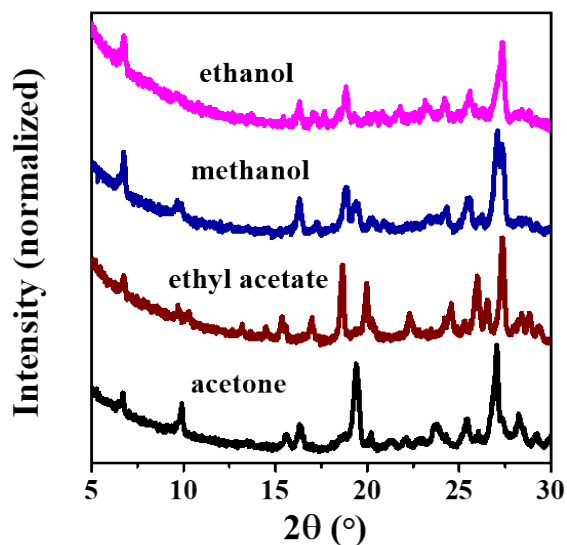

**Figure S2.** PXRD patterns of BOS monohydrate prepared by anti-solvent method. 1 ml BOS saturated acetone/ethyl acetate/methanol/ethanol solution and 100 ml deionized water were mixed quickly and stirred overnight.

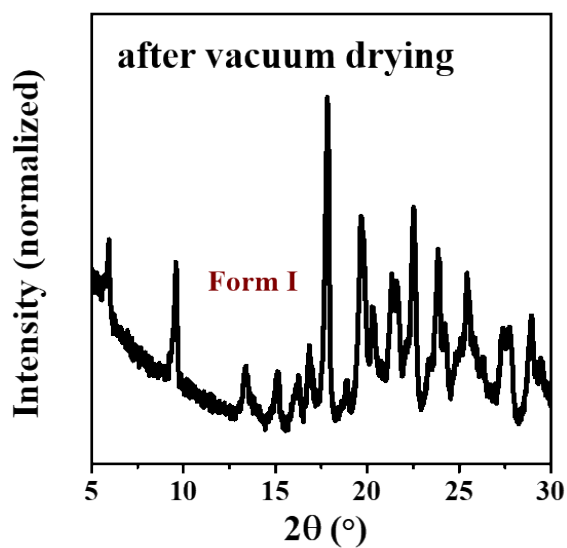

**Figure S3.** PXRD pattern of BOS monohydrate after vacuum drying overnight.

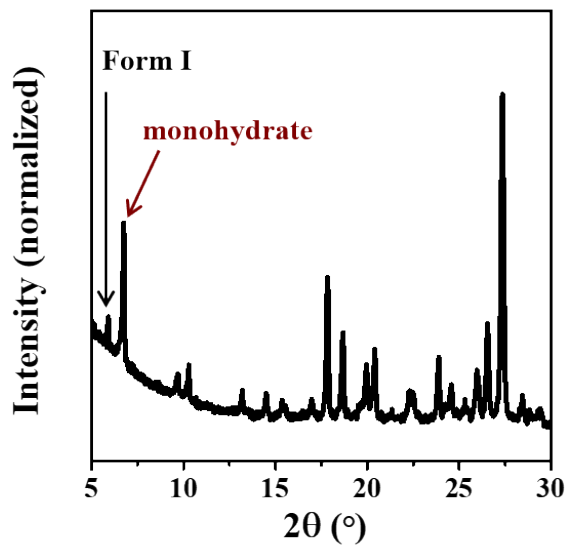

**Figure S4.** PXRD pattern of the product prepared by evaporation of 50 μl BOS saturated acetone solution at room temperature with low ambient humidity.

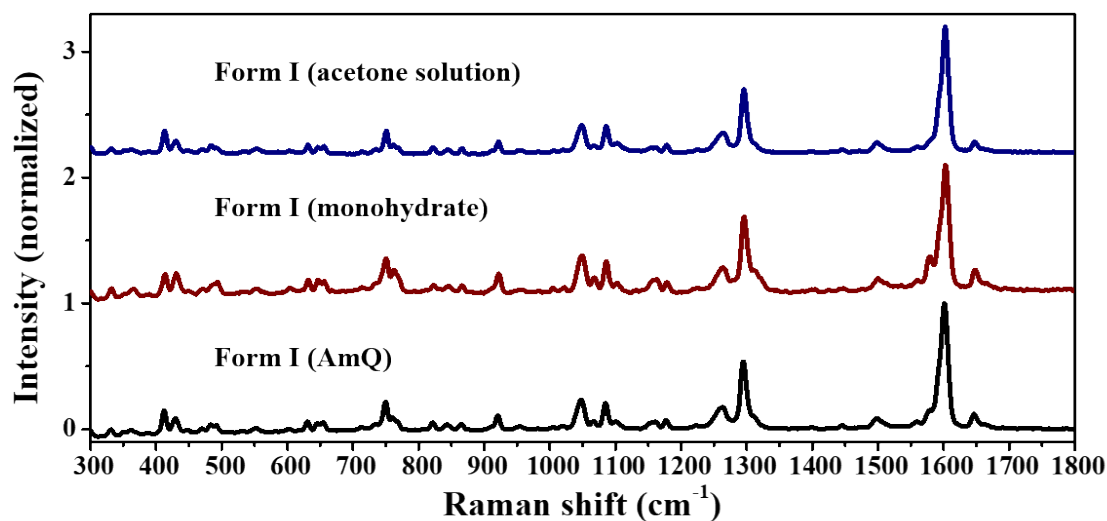

**Figure S5.** The MFRS of boscalid Form I prepared by different methods in this work. Form I prepared by heating AmQ at 100 °C for 10 min is referred as Form I (AmQ), Form I prepared by heating monohydrate at 100 °C for 10 min is referred as Form I (monohydrate), and Form I prepared by solvent evaporation of 50  $\mu$ l BOS acetone solution at 60 °C is referred as Form I (acetone solution) here.

**Table S1.** Summary of the a.d. and s.d. of all the data in the MFRDS with baseline deduction of BOS Form I prepared by the three different methods.

| MFRDS                                       | a.d. $\times 10^3$ | s.d. $\times 10^3$ |
|---------------------------------------------|--------------------|--------------------|
| self-Form I (AmQ)                           | 7.8 (2.2)          | 15 (6)             |
| self-Form I (monohydrate)                   | 4.7 (1.7)          | 5.9 (2.0)          |
| self-Form I (acetone solution)              | 9.4 (3.4)          | 14 (6)             |
| Form I (AmQ) with Form I (monohydrate)      | 11.5<br>(2.9)      | 18 (5)             |
| Form I (AmQ) with Form I (acetone solution) | 9.8 (1.6)          | 15 (4)             |

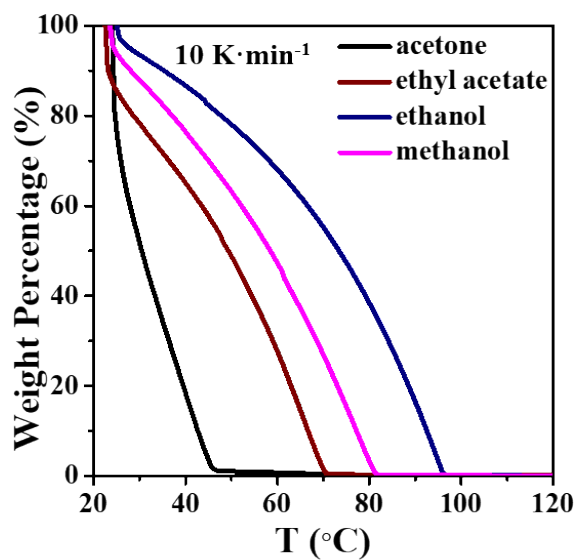

**Figure S6.** Thermogravimetry curves of 50 µl BOS acetone/ethyl acetate/ethanol/methanol solutions. The residual of BOS solids was set to 0%.

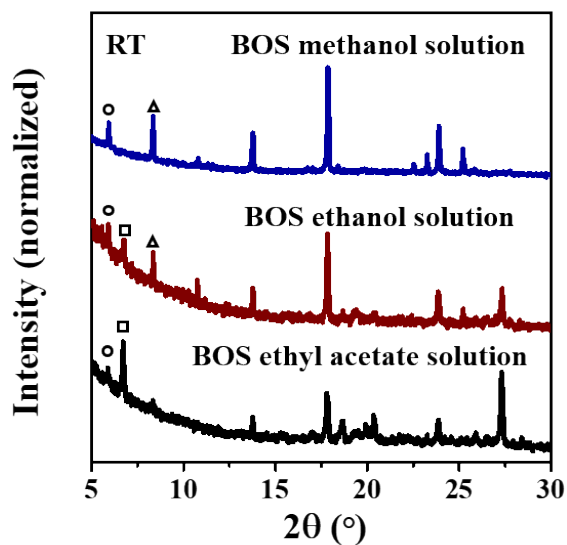

**Figure S7.** PXRD patterns of the evaporation products of 50 µl BOS saturated ethyl acetate/ethanol/methanol solution at room temperature in a day without rain (○ Form I, △ Form II, □ monohydrate).

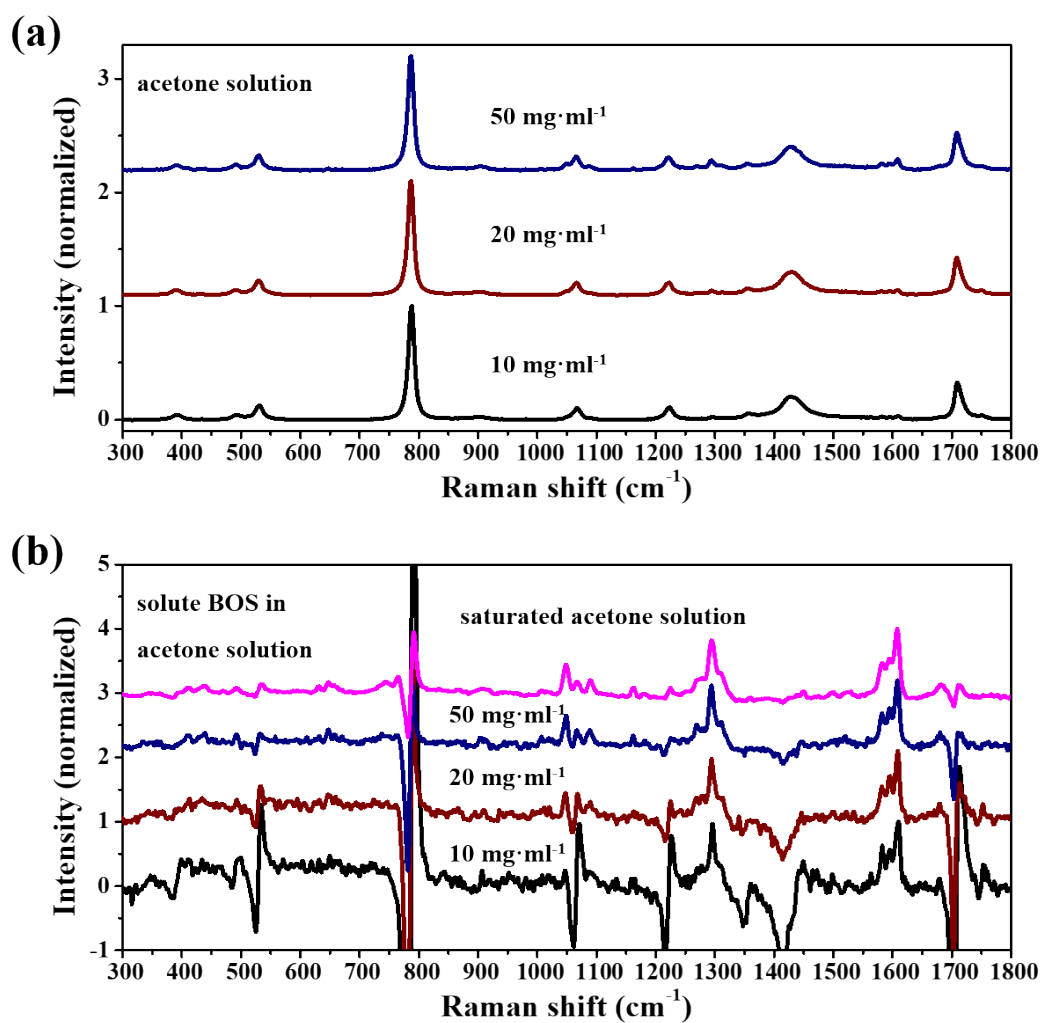

**Figure S8.** (a) MFRS of BOS acetone solutions with different concentrations, (b) MFRS of solute BOS in acetone solutions with different concentrations.
