# Supplementary material for: Explanation and prediction of the selective crystallization of boscalid by mid-frequency Raman difference spectroscopy analysis
Source: Royal Society of Chemistry journal article supplement (doi:10.1039/d2ce01679f), 2023-01-01
Supplement: d2ce01679f2.xlsx [file d2ce01679f2.xlsx]

## Sheet: AMQ-Form II
range	Form II-1	Form II-2	Form II-3	AMQ-1	AMQ-2	AMQ-3										baseline-1	baseline-2	baseline-3	baseline-4	baseline-5	baseline-6	baseline-7	baseline-8	baseline-9	MFRDS-1	MFRDS-2	MFRDS-3	MFRDS-4	MFRDS-5	MFRDS-6	MFRDS-7	MFRDS-8	MFRDS-9
300.125	-0.00563285	-0.0169428	-0.00626087	-0.0026038	-0.00463264	-0.00462456	0.00302905	0.00100022	0.00100829	0.014339	0.0123102	0.0123183	0.00365707	0.00162823	0.0016363	-0.06407	-0.06526	-0.06789	-0.05337	-0.05456	-0.05719	-0.06877	-0.06995	-0.07259	0.067099	0.0662602	0.0688983	0.067709	0.0668702	0.0695083	0.0681407	0.0672919	0.0699399
301.089	-0.00588363	-0.017935	-0.00779919	-0.00916609	-0.0101181	-0.0106064	-0.00328246	-0.00423444	-0.00472279	0.00876893	0.00781695	0.0073286	-0.0013669	-0.00231888	-0.00280723	-0.06061	-0.06178	-0.06436	-0.05002	-0.05118	-0.05377	-0.06532	-0.06649	-0.06908	0.0573275	0.0575456	0.0596372	0.0587889	0.0589969	0.0610986	0.0586625	0.0588805	0.0609822
302.054	-0.00616186	-0.0181972	-0.00854651	-0.0134976	-0.0151191	-0.0163429	-0.00733578	-0.00895724	-0.0101811	0.00469953	0.00307807	0.00185423	-0.00495112	-0.00657259	-0.00779643	-0.05725	-0.05841	-0.06093	-0.04676	-0.04791	-0.05044	-0.06198	-0.06314	-0.06566	0.0499142	0.0494528	0.0507489	0.0514595	0.0509881	0.0522942	0.0509158	0.0504543	0.0517505
303.018	-0.00645214	-0.0181781	-0.00894309	-0.0167069	-0.0195705	-0.0213372	-0.0102548	-0.0131183	-0.0148851	0.00147116	-0.00139241	-0.00315915	-0.0077638	-0.0106274	-0.0123941	-0.05399	-0.05513	-0.05761	-0.0436	-0.04474	-0.04722	-0.05874	-0.05988	-0.06235	0.0437352	0.0420117	0.0427249	0.0450712	0.0433476	0.0440609	0.0442308	0.0425073	0.0432105
303.982	-0.00680945	-0.0179793	-0.00913197	-0.019377	-0.0234367	-0.0251433	-0.0125676	-0.0166272	-0.0183338	-0.00139771	-0.00545738	-0.00716399	-0.010245	-0.0143047	-0.0160113	-0.05083	-0.05195	-0.05438	-0.04054	-0.04167	-0.04409	-0.05559	-0.05671	-0.05914	0.0382624	0.0353228	0.0360462	0.0391423	0.0362126	0.036926	0.0383617	0.035422	0.0361454
304.946	-0.00717574	-0.0177866	-0.00925523	-0.021821	-0.0265675	-0.0277713	-0.0146453	-0.0193918	-0.0205956	-0.00403438	-0.00878088	-0.00998467	-0.0125658	-0.0173123	-0.0185161	-0.04776	-0.04887	-0.05125	-0.03758	-0.03868	-0.04106	-0.05254	-0.05364	-0.05602	0.0331147	0.0294782	0.0306544	0.0335456	0.0298991	0.0310753	0.0330079	0.0293614	0.0305377
305.911	-0.00753859	-0.017876	-0.00958349	-0.0248025	-0.0288619	-0.0288808	-0.0172639	-0.0213233	-0.0213422	-0.0069265	-0.0109859	-0.0110048	-0.015219	-0.0192784	-0.0192973	-0.04479	-0.04588	-0.04821	-0.0347	-0.0358	-0.03812	-0.04958	-0.05067	-0.05299	0.0275261	0.0245567	0.0268678	0.0277735	0.0248141	0.0271152	0.0276843	0.0247149	0.027016
306.875	-0.00781605	-0.0180785	-0.00987416	-0.027553	-0.0301368	-0.0290776	-0.0197369	-0.0223207	-0.0212616	-0.00947451	-0.0120583	-0.0109991	-0.0176788	-0.0202626	-0.0192035	-0.04191	-0.04299	-0.04526	-0.03192	-0.033	-0.03527	-0.04671	-0.04778	-0.05006	0.0221731	0.0206693	0.0239984	0.0224455	0.0209417	0.0242709	0.02265	0.0211362	0.0244754
307.839	-0.00783772	-0.0183507	-0.00993174	-0.0297165	-0.0298347	-0.0287749	-0.0218788	-0.021997	-0.0209371	-0.0113658	-0.0114841	-0.0104242	-0.0197847	-0.019903	-0.0188431	-0.03912	-0.04018	-0.04241	-0.02923	-0.03029	-0.03252	-0.04393	-0.04499	-0.04721	0.0172412	0.018183	0.0214729	0.0178642	0.0188059	0.0220958	0.0176919	0.0186337	0.0219136
308.803	-0.00785653	-0.0185916	-0.00988549	-0.030819	-0.0289775	-0.0282099	-0.0229624	-0.021121	-0.0203534	-0.0122273	-0.0103859	-0.00961831	-0.0209335	-0.019092	-0.0183244	-0.03642	-0.03747	-0.03964	-0.02663	-0.02767	-0.02985	-0.04124	-0.04228	-0.04446	0.0134576	0.016349	0.0192866	0.0144027	0.0172841	0.0202317	0.0137524	0.0166339	0.0195815
309.768	-0.00822899	-0.0186657	-0.00980691	-0.0298762	-0.0285225	-0.0278091	-0.0216472	-0.0202935	-0.0195801	-0.0112105	-0.00985681	-0.0091434	-0.0200693	-0.0187156	-0.0180022	-0.03381	-0.03484	-0.03696	-0.02411	-0.02514	-0.02726	-0.03863	-0.03966	-0.04179	0.0121628	0.0145465	0.0173799	0.0128995	0.0152832	0.0181166	0.012095	0.0144786	0.017322
310.732	-0.00847407	-0.0186336	-0.00967369	-0.0280627	-0.0281051	-0.0274189	-0.0195886	-0.0196311	-0.0189448	-0.00942916	-0.00947158	-0.00878533	-0.018389	-0.0184314	-0.0177452	-0.03128	-0.03229	-0.03437	-0.02168	-0.02269	-0.02477	-0.03611	-0.03712	-0.0392	0.0116914	0.0126589	0.0154252	0.0122508	0.0132184	0.0159847	0.011523	0.0124905	0.0152568
311.696	-0.00804185	-0.0184489	-0.00942455	-0.0261774	-0.0277382	-0.0270063	-0.0181356	-0.0196964	-0.0189645	-0.00772855	-0.00928934	-0.00855745	-0.0167529	-0.0183137	-0.0175818	-0.02883	-0.02983	-0.03186	-0.01932	-0.02032	-0.02235	-0.03367	-0.03467	-0.0367	0.0106944	0.0101336	0.0128955	0.0115914	0.0110307	0.0137926	0.0113753	0.0108145	0.0135764
312.66	-0.00749547	-0.0182965	-0.00924795	-0.0243633	-0.0272463	-0.0266356	-0.0168678	-0.0197508	-0.0191402	-0.00606686	-0.00894985	-0.00833917	-0.0151154	-0.0179984	-0.0173877	-0.02647	-0.02745	-0.02944	-0.01705	-0.01803	-0.02002	-0.03131	-0.03229	-0.03428	0.00960216	0.00769917	0.0102998	0.0109831	0.00908015	0.0116808	0.0112589	0.00935593	0.0119566
313.625	-0.00721354	-0.0183946	-0.00935502	-0.0231001	-0.0264353	-0.0264382	-0.0158865	-0.0192218	-0.0192247	-0.00470543	-0.00804071	-0.00804359	-0.013745	-0.0170803	-0.0170832	-0.02419	-0.02515	-0.02709	-0.01486	-0.01583	-0.01777	-0.02903	-0.03	-0.03194	0.00830348	0.0059282	0.00786532	0.0101546	0.00778929	0.00972641	0.0104818	0.00811651	0.0100536
314.589	-0.0071998	-0.0185966	-0.00961651	-0.0221766	-0.0253743	-0.0261797	-0.0149768	-0.0181745	-0.0189799	-0.00357995	-0.00677763	-0.00758302	-0.0125601	-0.0157578	-0.0165632	-0.02198	-0.02293	-0.02483	-0.01275	-0.0137	-0.0156	-0.02683	-0.02778	-0.02968	0.0070032	0.00475552	0.00585014	0.00917005	0.00692237	0.00801698	0.00928963	0.00704195	0.00813657
315.553	-0.00771499	-0.0189369	-0.0100763	-0.0216916	-0.0239998	-0.0257656	-0.0139766	-0.0162849	-0.0180506	-0.00275465	-0.00506292	-0.00682866	-0.0116152	-0.0139235	-0.0156892	-0.01986	-0.02079	-0.02264	-0.01071	-0.01164	-0.0135	-0.02471	-0.02564	-0.02749	0.00588342	0.00450514	0.0045894	0.00795535	0.00657708	0.00667134	0.00747232	0.00609405	0.0061783
316.517	-0.00836681	-0.0190904	-0.010426	-0.0211957	-0.0225148	-0.0249072	-0.0128289	-0.014148	-0.0165404	-0.00210529	-0.00342439	-0.00581684	-0.0107696	-0.0120887	-0.0144812	-0.0178	-0.01872	-0.02053	-0.00875	-0.00967	-0.01148	-0.02266	-0.02357	-0.02538	0.00497114	0.00457204	0.0039896	0.00664471	0.00624561	0.00566316	0.00569538	0.00528629	0.00470384
317.481	-0.00883663	-0.0185926	-0.0102566	-0.0201415	-0.0212889	-0.0228645	-0.0113049	-0.0124523	-0.0140279	-0.00154887	-0.00269626	-0.00427189	-0.00988486	-0.0110323	-0.0126079	-0.01583	-0.01672	-0.01849	-0.00686	-0.00776	-0.00953	-0.02068	-0.02158	-0.02335	0.00452512	0.00426772	0.00446209	0.00531113	0.00506374	0.00525811	0.00474896	0.00450156	0.00469594
318.446	-0.0091642	-0.0178959	-0.00991326	-0.0189219	-0.0197575	-0.0208967	-0.00975766	-0.0105933	-0.0117325	-0.00102601	-0.00186168	-0.0030008	-0.0090086	-0.00984427	-0.0109834	-0.01392	-0.0148	-0.01653	-0.00505	-0.00593	-0.00765	-0.01878	-0.01966	-0.02138	0.00416234	0.00420667	0.00479754	0.00402399	0.00406832	0.0046492	0.00408913	0.00413346	0.00471433
319.41	-0.00924655	-0.017289	-0.00959859	-0.017958	-0.0171663	-0.0205254	-0.00871149	-0.00791978	-0.0112789	-0.000669015	0.000122697	-0.00323641	-0.00835945	-0.00756774	-0.0109269	-0.01209	-0.01295	-0.01463	-0.0033	-0.00416	-0.00585	-0.01694	-0.0178	-0.01949	0.00337851	0.00503022	0.00335111	0.00263098	0.0042827	0.00261359	0.00318331	0.00483502	0.00316591
320.374	-0.00919328	-0.0167971	-0.00933053	-0.016617	-0.0144538	-0.0202227	-0.00742368	-0.00526055	-0.0110294	0.000180113	0.00234324	-0.00342558	-0.00728643	-0.00512331	-0.0108921	-0.01032	-0.01116	-0.01281	-0.00162	-0.00247	-0.00411	-0.01518	-0.01602	-0.01767	0.00289632	0.00589945	0.00178063	0.00180011	0.00481324	0.000684419	0.00271765	0.00572077	0.00160195
321.338	-0.00906041	-0.0165577	-0.00918549	-0.0141363	-0.0123576	-0.0188093	-0.00507587	-0.00329716	-0.00974884	0.00242137	0.00420008	-0.0022516	-0.00495079	-0.00317208	-0.00962376	-0.00862	-0.00945	-0.01106	-9.58405e-06	-0.00083776	-0.00244	-0.01348	-0.0143	-0.01591	0.00354413	0.00615284	0.00131116	0.00243095	0.00503784	0.0001884	0.00341254	0.00601125	0.00116957
322.303	-0.00890573	-0.0165215	-0.00919059	-0.0113251	-0.0107261	-0.0167594	-0.00241939	-0.00182038	-0.00785372	0.00519638	0.00579539	-0.000237951	-0.00213452	-0.00153551	-0.00756885	-0.00699	-0.0078	-0.00937	0.00154	0.00072491	-0.000840703	-0.01184	-0.01265	-0.01422	0.00457061	0.00597962	0.00151628	0.00365638	0.00507048	0.000602752	0.00453259	0.0059416	0.00147826
323.267	-0.00880801	-0.0167424	-0.00943263	-0.00866021	-0.00974015	-0.0139142	0.000147798	-0.000932139	-0.00510616	0.00808214	0.00700221	0.00282819	0.00077242	-0.000307516	-0.00448153	-0.00542	-0.00622	-0.00775	0.00302	0.00222	0.000696778	-0.01027	-0.01107	-0.01259	0.0055678	0.00528786	0.00264384	0.00506214	0.00478221	0.00213141	0.0056921	0.00541216	0.00275814
324.231	-0.00876028	-0.0170488	-0.00980898	-0.00637629	-0.00914082	-0.0109942	0.00238399	-0.000380538	-0.00223389	0.0106725	0.00790795	0.0060546	0.00343269	0.000668162	-0.00118519	-0.00392	-0.0047	-0.00619	0.00444	0.00366	0.00217	-0.00877	-0.00954	-0.01103	0.00630399	0.00431946	0.00395611	0.00623248	0.00424795	0.0038846	0.00661228	0.00461776	0.00425441
325.195	-0.00879716	-0.0173335	-0.0102925	-0.00492235	-0.0088264	-0.00850121	0.00387481	-2.92328e-05	0.000295951	0.0124111	0.00850708	0.00883227	0.00537015	0.00146611	0.00179129	-0.00248	-0.00324	-0.00469	0.00579	0.00503	0.00358	-0.00732	-0.00808	-0.00953	0.00635481	0.00321077	0.00498595	0.00662113	0.00347708	0.00525227	0.00683667	0.00369263	0.00546781
326.159	-0.00887262	-0.0174577	-0.0107436	-0.00413226	-0.00850615	-0.00693331	0.00474036	0.000366477	0.00193932	0.0133254	0.00895153	0.0105244	0.0066113	0.00223742	0.00381026	-0.0011	-0.00184	-0.00326	0.00709	0.00635	0.00493	-0.00594	-0.00668	-0.00809	0.00584036	0.00220648	0.00519932	0.00623541	0.00260153	0.00559437	0.00646271	0.00282883	0.00581167
327.124	-0.00896476	-0.0171403	-0.0110071	-0.00425377	-0.00782792	-0.0074374	0.00471099	0.00113684	0.00152736	0.0128865	0.00931237	0.00970289	0.00675336	0.00317921	0.00356973	0.00021713	-0.000507672	-0.00188	0.00833	0.0076	0.00623	-0.00461	-0.00534	-0.00671	0.00449386	0.00164451	0.00340736	0.00455652	0.00171237	0.00347289	0.00514235	0.0022982	0.00405872
328.088	-0.00903578	-0.0167009	-0.0111023	-0.00449423	-0.00687423	-0.00856845	0.00454155	0.00216155	0.000467332	0.0122067	0.00982666	0.00813244	0.00660805	0.00422805	0.00253383	0.00148	0.000771374	-0.000568107	0.00951	0.0088	0.00746	-0.00334	-0.00405	-0.00539	0.00306155	0.00139018	0.00103544	0.00269666	0.00102666	0.000672439	0.00366555	0.00199556	0.00164133
329.052	-0.00903361	-0.0163071	-0.0109449	-0.00400742	-0.00560977	-0.00947742	0.00502619	0.00342384	-0.000443807	0.0122996	0.0106973	0.00682964	0.0069375	0.00533516	0.00146751	0.00268	0.00199	0.000689925	0.01063	0.00994	0.00864	-0.00213	-0.00282	-0.00413	0.00234619	0.00143384	-0.00113373	0.00166964	0.000757289	-0.00181036	0.00278418	0.00187183	-0.000685818
330.017	-0.00897925	-0.0161337	-0.0106896	-0.00320183	-0.00403589	-0.00952323	0.00577742	0.00494336	-0.00054398	0.0129319	0.0120978	0.00661047	0.00748772	0.00665367	0.00116633	0.00383	0.00316	0.00189	0.0117	0.01103	0.00976	-0.000975468	-0.00165	-0.00292	0.00194742	0.00178336	-0.00243398	0.00123187	0.00106781	-0.00314953	0.00224997	0.00209044	-0.00212689
330.981	-0.008878	-0.0166196	-0.0105251	-0.00220756	-0.00210355	-0.00720417	0.00667044	0.00677445	0.00167382	0.014412	0.014516	0.00941541	0.00831757	0.00842159	0.00332096	0.00493	0.00427	0.00304	0.01272	0.01206	0.01083	0.000127524	-0.000527296	-0.00176	0.00174044	0.00250445	-0.00136618	0.00169202	0.00245604	-0.00141459	0.00210001	0.00285884	-0.00100908
331.945	-0.00872493	-0.0171407	-0.0102642	-0.00101357	7.13653e-05	-0.00425315	0.00771137	0.0087963	0.00447178	0.0161272	0.0172121	0.0128876	0.00925061	0.0103355	0.00601102	0.00597	0.00533	0.00413	0.01368	0.01304	0.01184	0.00118	0.0005408	-0.00065849	0.00174137	0.0034663	0.00034178	0.00244717	0.0041721	0.00104758	0.00223096	0.00395509	0.000829864
332.909	-0.00849734	-0.0171166	-0.00972584	0.000265381	0.00247533	-0.0020972	0.00876272	0.0109727	0.00640014	0.0173819	0.0195919	0.0150194	0.00999122	0.0122012	0.00762863	0.00696	0.00634	0.00517	0.01459	0.01397	0.01281	0.00218	0.00156	0.000392258	0.00180272	0.00463267	0.00123014	0.00279194	0.00562189	0.00220936	0.00249451	0.00532446	0.00191967
333.873	-0.0082539	-0.0168557	-0.00907917	0.00187661	0.0048502	-0.000152207	0.0101305	0.0131041	0.00810169	0.0187323	0.0217059	0.0167035	0.0109558	0.0139294	0.00892696	0.0079	0.0073	0.00616	0.01545	0.01485	0.01372	0.00313	0.00252	0.00139	0.00223051	0.0058041	0.00194169	0.00328232	0.00685591	0.0029835	0.00307308	0.00665668	0.00278427
334.838	-0.00805327	-0.0164083	-0.00840455	0.00409135	0.00693848	0.00150573	0.0121446	0.0149917	0.00955899	0.0204997	0.0233468	0.0179141	0.0124959	0.015343	0.00991028	0.00879	0.0082	0.00711	0.01627	0.01568	0.01458	0.00403	0.00344	0.00234	0.00335462	0.00679175	0.00244899	0.00422967	0.00766681	0.00333405	0.00416234	0.00759947	0.00326672
335.802	-0.00787276	-0.0159693	-0.00778712	0.00672312	0.00872472	0.00343026	0.0145959	0.0165975	0.011303	0.0226924	0.024694	0.0193996	0.0145102	0.0165118	0.0112174	0.00963	0.00906	0.008	0.01703	0.01646	0.0154	0.00488	0.00431	0.00325	0.00496588	0.00753748	0.00330302	0.00566245	0.00823405	0.00399958	0.00557971	0.00815132	0.00391685
336.766	-0.00780211	-0.0160244	-0.00746736	0.0102023	0.00984929	0.00655666	0.0180044	0.0176514	0.0143588	0.0262267	0.0258737	0.022581	0.0176697	0.0173167	0.014024	0.01043	0.00988	0.00884	0.01775	0.0172	0.01617	0.00569	0.00514	0.0041	0.00757443	0.0077714	0.00551877	0.00847669	0.00867365	0.00641102	0.00766096	0.00785793	0.00560529
337.73	-0.00756275	-0.0157514	-0.00705959	0.0129495	0.0110872	0.00966394	0.0205123	0.01865	0.0172267	0.028701	0.0268386	0.0254153	0.0200091	0.0181468	0.0167235	0.01117	0.01064	0.00964	0.01842	0.01789	0.01689	0.00645	0.00591	0.00491	0.0093423	0.00800999	0.00758669	0.010281	0.00894865	0.00852535	0.00902684	0.00770453	0.00728123
338.695	-0.00694407	-0.0142374	-0.00638751	0.0127512	0.0135588	0.0117287	0.0196952	0.0205029	0.0186728	0.0269885	0.0277962	0.025966	0.0191387	0.0199463	0.0181162	0.01188	0.01137	0.01039	0.01905	0.01854	0.01757	0.00716	0.00665	0.00568	0.00781522	0.0091329	0.00828276	0.00793851	0.00925618	0.00839605	0.00794203	0.0092597	0.00839957
339.659	-0.00583198	-0.0122412	-0.00506356	0.0119401	0.0158687	0.0130934	0.0177721	0.0217007	0.0189254	0.0241813	0.0281099	0.0253346	0.0170036	0.0209323	0.018157	0.01254	0.01204	0.0111	0.01964	0.01914	0.0182	0.00783	0.00734	0.0064	0.00523207	0.0096607	0.00782543	0.00454127	0.0089699	0.00713463	0.00578041	0.010199	0.00836378
340.623	-0.00404447	-0.0103983	-0.00265323	0.0123675	0.0166817	0.0134126	0.016412	0.0207262	0.0174571	0.0227658	0.02708	0.0238109	0.0150208	0.019335	0.0160658	0.01316	0.01268	0.01177	0.02018	0.0197	0.01879	0.00847	0.00799	0.00708	0.00325201	0.0080462	0.00568706	0.00258581	0.00738	0.00502086	0.00342383	0.00821801	0.00585888
341.587	-0.00157472	-0.00816635	0.000878977	0.013265	0.0169376	0.0137271	0.0148397	0.0185123	0.0153018	0.0214313	0.0251039	0.0218934	0.012386	0.0160586	0.0128481	0.01373	0.01327	0.01239	0.02068	0.02023	0.01934	0.00906	0.0086	0.00771	0.00110971	0.00524228	0.00291179	0.000751344	0.00487391	0.00255342	0.000633026	0.0047656	0.0024451
342.551	0.00174699	-0.00522421	0.00585925	0.0147092	0.0173055	0.0152617	0.0129622	0.0155585	0.0135147	0.0199334	0.0225297	0.0204859	0.00884999	0.0114463	0.00940242	0.01427	0.01383	0.01297	0.02115	0.02071	0.01985	0.0096	0.00916	0.00831	-0.00130776	0.00172851	0.000544676	-0.00121656	0.00181971	0.00063588	-0.0023922	0.000644074	-0.00054976
343.516	0.00561389	-0.00154415	0.01185	0.0160154	0.0172617	0.0171191	0.0104015	0.0116478	0.0115052	0.0175595	0.0188058	0.0186633	0.00416538	0.00541163	0.00526909	0.01476	0.01434	0.01352	0.02157	0.02115	0.02032	0.01012	0.00969	0.00887	-0.00435849	-0.00269224	-0.00201477	-0.00401045	-0.0023442	-0.00165673	-0.0061672	-0.00449095	-0.00381348
344.48	0.00990265	0.00315858	0.0188159	0.0164961	0.0164259	0.0190547	0.00659343	0.00652325	0.00915207	0.0133375	0.0132673	0.0158961	-0.00231981	-0.00238998	0.000238839	0.01522	0.01482	0.01402	0.02196	0.02155	0.02076	0.01059	0.01018	0.00939	-0.00862657	-0.00829675	-0.00486793	-0.0086225	-0.00828268	-0.00486386	-0.0112621	-0.0109223	-0.00750348
345.444	0.0142326	0.00843405	0.0258766	0.0162357	0.0150362	0.0203355	0.00200308	0.000803585	0.00610291	0.00780163	0.00660214	0.0119015	-0.00964093	-0.0108404	-0.0055411	0.01564	0.01526	0.01449	0.02231	0.02192	0.02115	0.01102	0.01064	0.00987	-0.0136369	-0.0144564	-0.00838709	-0.0145084	-0.0153179	-0.00924854	-0.0171428	-0.0179623	-0.011893
346.408	0.0183059	0.0142827	0.0325656	0.0146432	0.0126955	0.0201265	-0.00366273	-0.00561037	0.00182058	0.000360476	-0.00158716	0.00584379	-0.0179224	-0.01987	-0.0124391	0.01603	0.01566	0.01492	0.02262	0.02225	0.02151	0.01142	0.01105	0.01031	-0.0196927	-0.0212704	-0.0130994	-0.0222595	-0.0238372	-0.0156662	-0.0241835	-0.0257611	-0.0175902
347.373	0.0217509	0.0196382	0.0376067	0.0130575	0.0109285	0.0184891	-0.0086934	-0.0108223	-0.0032618	-0.00658074	-0.00870967	-0.00114914	-0.0245492	-0.0266781	-0.0191176	0.01638	0.01602	0.01531	0.0229	0.02255	0.02183	0.01179	0.01144	0.01072	-0.0250734	-0.0268423	-0.0185718	-0.0294807	-0.0312597	-0.0229791	-0.0302593	-0.0320382	-0.0237577
348.337	0.0242101	0.023473	0.0391144	0.0130899	0.0119625	0.0144185	-0.0111202	-0.0122476	-0.00979163	-0.0103831	-0.0115104	-0.00905447	-0.0260245	-0.0271519	-0.0246959	0.01669	0.01636	0.01567	0.02314	0.02281	0.02212	0.01212	0.01179	0.0111	-0.0278102	-0.0286076	-0.0254616	-0.0335231	-0.0343204	-0.0311745	-0.0327945	-0.0335918	-0.0304459
349.301	0.025343	0.0256712	0.0384503	0.0133322	0.0132922	0.0102782	-0.0120107	-0.0120508	-0.0150648	-0.012339	-0.0123791	-0.015393	-0.0251181	-0.0251582	-0.0281722	0.01697	0.01666	0.016	0.02336	0.02304	0.02238	0.01242	0.0121	0.01144	-0.0289807	-0.0287108	-0.0310648	-0.035699	-0.0354191	-0.037773	-0.0334857	-0.0332058	-0.0355597
350.265	0.0242125	0.0253898	0.0359845	0.0129255	0.0129605	0.00878192	-0.011287	-0.011252	-0.0154306	-0.0124642	-0.0124292	-0.0166078	-0.023059	-0.0230239	-0.0272026	0.01722	0.01692	0.01629	0.02353	0.02324	0.0226	0.01268	0.01238	0.01175	-0.028507	-0.028172	-0.0317206	-0.0359942	-0.0356692	-0.0392078	-0.0327442	-0.0324092	-0.0359578
351.23	0.0222495	0.0237831	0.0328059	0.0118328	0.0115493	0.00787351	-0.0104167	-0.0107001	-0.0143759	-0.0119503	-0.0122338	-0.0159096	-0.0209731	-0.0212566	-0.0249324	0.01744	0.01716	0.01655	0.02368	0.0234	0.0228	0.01292	0.01264	0.01203	-0.0278567	-0.0278601	-0.0309259	-0.0356303	-0.0356338	-0.0387096	-0.0318201	-0.0318236	-0.0348894
352.194	0.0204589	0.0214893	0.0300182	0.0094864	0.00865956	0.00629407	-0.0109725	-0.0117993	-0.0141648	-0.0120029	-0.0128297	-0.0151952	-0.0205318	-0.0213586	-0.0237241	0.01762	0.01736	0.01678	0.0238	0.02354	0.02296	0.01312	0.01286	0.01227	-0.0285925	-0.0291593	-0.0309448	-0.0358029	-0.0363697	-0.0381552	-0.0321795	-0.0327463	-0.0345218
353.158	0.0191808	0.0192143	0.0279477	0.00661961	0.00527587	0.00436537	-0.0125612	-0.013905	-0.0148155	-0.0125947	-0.0139385	-0.014849	-0.0213281	-0.0226719	-0.0235824	0.01778	0.01754	0.01698	0.02389	0.02365	0.02309	0.01329	0.01305	0.01249	-0.0303412	-0.031445	-0.0317955	-0.0364847	-0.0375885	-0.037939	-0.0334852	-0.0345889	-0.0349394
354.122	0.0192062	0.0179508	0.0274228	0.00369854	0.00219692	0.00185129	-0.0155077	-0.0170093	-0.0173549	-0.0142522	-0.0157539	-0.0160995	-0.0237242	-0.0252259	-0.0255715	0.01791	0.01768	0.01715	0.02395	0.02373	0.02319	0.01344	0.01321	0.01268	-0.0334177	-0.0346893	-0.0345049	-0.0382022	-0.0394839	-0.0392895	-0.0360975	-0.0373691	-0.0371847
355.087	0.0201877	0.0174767	0.0280421	0.000957068	-0.000418604	-0.000833412	-0.0192307	-0.0206063	-0.0210211	-0.0165196	-0.0178953	-0.0183101	-0.027085	-0.0284607	-0.0288755	0.01801	0.0178	0.01729	0.02398	0.02378	0.02327	0.01356	0.01335	0.01284	-0.0372407	-0.0384063	-0.0383111	-0.0404996	-0.0416753	-0.0415801	-0.0394003	-0.040566	-0.0404708
356.051	0.0223527	0.0182329	0.030009	-0.00113904	-0.00195296	-0.00349896	-0.0234917	-0.0243057	-0.0258517	-0.019372	-0.0201859	-0.0217319	-0.0311481	-0.031962	-0.033508	0.01808	0.01789	0.0174	0.02399	0.0238	0.02331	0.01365	0.01346	0.01297	-0.0415717	-0.0421957	-0.0432517	-0.043362	-0.0439859	-0.0450419	-0.0431589	-0.0437828	-0.0448388
357.015	0.024768	0.019224	0.032338	-0.00281926	-0.00298462	-0.00570652	-0.0275873	-0.0277526	-0.0304745	-0.0220432	-0.0222086	-0.0249305	-0.0351573	-0.0353226	-0.0380445	0.01812	0.01795	0.01749	0.02397	0.0238	0.02334	0.01371	0.01354	0.01308	-0.0457073	-0.0457026	-0.0479645	-0.0460132	-0.0460086	-0.0482705	-0.046609	-0.0466044	-0.0488663
357.979	0.0267048	0.0195815	0.0342115	-0.00424977	-0.00401999	-0.00689948	-0.0309545	-0.0307248	-0.0336043	-0.0238313	-0.0236015	-0.026481	-0.0384613	-0.0382315	-0.041111	0.01814	0.01799	0.01755	0.02392	0.02377	0.02333	0.01375	0.0136	0.01316	-0.0490945	-0.0487148	-0.0511543	-0.0477513	-0.0473715	-0.049811	-0.049098	-0.0487182	-0.0511577
358.943	0.0277775	0.0193647	0.0353285	-0.00515475	-0.00465754	-0.00724144	-0.0329322	-0.032435	-0.0350189	-0.0245194	-0.0240222	-0.0266061	-0.0404832	-0.039986	-0.0425699	0.01814	0.01801	0.01759	0.02385	0.02372	0.0233	0.01376	0.01363	0.01321	-0.0510722	-0.050445	-0.0526089	-0.0483694	-0.0477422	-0.0499061	-0.0500758	-0.0494486	-0.0516125
359.908	0.02706	0.0181659	0.0348208	-0.00516795	-0.00454602	-0.00649112	-0.032228	-0.031606	-0.0335511	-0.0233339	-0.0227119	-0.024657	-0.0399887	-0.0393668	-0.0413119	0.01811	0.018	0.0176	0.02376	0.02365	0.02325	0.01376	0.01364	0.01324	-0.050338	-0.049606	-0.0511511	-0.0470939	-0.0463619	-0.047907	-0.0482785	-0.0475365	-0.0490816
360.872	0.025445	0.0165167	0.0335724	-0.00472675	-0.00404106	-0.00530658	-0.0301717	-0.029486	-0.0307515	-0.0212435	-0.0205578	-0.0218233	-0.0382991	-0.0376134	-0.038879	0.01806	0.01796	0.01759	0.02364	0.02355	0.02317	0.01372	0.01363	0.01325	-0.0482317	-0.047446	-0.0483415	-0.0448835	-0.0441078	-0.0449933	-0.0452456	-0.0444699	-0.0453554
361.836	0.0234008	0.0147418	0.032073	-0.00406476	-0.00329295	-0.00432136	-0.0274656	-0.0266937	-0.0277222	-0.0188065	-0.0180347	-0.0190631	-0.0361377	-0.0353659	-0.0363943	0.01799	0.01791	0.01755	0.02351	0.02343	0.02308	0.01367	0.01359	0.01324	-0.0454556	-0.0446037	-0.0452722	-0.0423165	-0.0414647	-0.0421431	-0.0419768	-0.041125	-0.0418034
362.8	0.0212734	0.0130538	0.0306378	-0.00342698	-0.00256649	-0.00336766	-0.0247004	-0.0238399	-0.0246411	-0.0164808	-0.0156203	-0.0164215	-0.0340648	-0.0332043	-0.0340055	0.01789	0.01783	0.0175	0.02335	0.02329	0.02296	0.01359	0.01353	0.0132	-0.0425904	-0.0416699	-0.0421411	-0.0398308	-0.0389103	-0.0393815	-0.0389678	-0.0380473	-0.0385185
363.765	0.0195181	0.0116898	0.0297229	-0.00315664	-0.00217226	-0.00243201	-0.0226747	-0.0216904	-0.0219501	-0.0148464	-0.0138621	-0.0141218	-0.0328795	-0.0318951	-0.0321549	0.01777	0.01773	0.01742	0.02317	0.02312	0.02281	0.0135	0.01345	0.01314	-0.0404447	-0.0394204	-0.0393701	-0.0380164	-0.0369821	-0.0369318	-0.037076	-0.0360416	-0.0359914
364.729	0.0182746	0.0109026	0.0293958	-0.0031927	-0.00212325	-0.0016849	-0.0214673	-0.0203979	-0.0199595	-0.0140953	-0.0130258	-0.0125875	-0.0325885	-0.031519	-0.0310807	0.01764	0.01761	0.01732	0.02297	0.02294	0.02265	0.01338	0.01336	0.01307	-0.0391073	-0.0380079	-0.0372795	-0.0370653	-0.0359658	-0.0352375	-0.0362862	-0.0351967	-0.0344684
365.693	0.0178461	0.0109922	0.0299317	-0.0036473	-0.00257496	-0.00119743	-0.0214934	-0.0204211	-0.0190435	-0.0146395	-0.0135671	-0.0121896	-0.033579	-0.0325067	-0.0311291	0.01748	0.01747	0.01721	0.02275	0.02274	0.02247	0.01324	0.01324	0.01297	-0.0389734	-0.0378911	-0.0362535	-0.0373895	-0.0363071	-0.0346596	-0.0369932	-0.0359209	-0.0342734
366.657	0.0181974	0.0120542	0.031164	-0.00434413	-0.0034104	-0.00125442	-0.0225416	-0.0216078	-0.0194518	-0.0163983	-0.0154646	-0.0133086	-0.0355081	-0.0345744	-0.0324184	0.01731	0.01732	0.01707	0.02251	0.02252	0.02227	0.01309	0.0131	0.01285	-0.0398516	-0.0389278	-0.0365218	-0.0389083	-0.0379846	-0.0355786	-0.0389043	-0.0379806	-0.0355746
367.622	0.019418	0.014416	0.033132	-0.00512323	-0.00457092	-0.00205313	-0.0245412	-0.0239889	-0.0214711	-0.0195392	-0.0189869	-0.0164691	-0.0382552	-0.0377029	-0.0351852	0.01711	0.01714	0.01691	0.02226	0.02229	0.02206	0.01292	0.01295	0.01272	-0.0416512	-0.0411289	-0.0383811	-0.0417992	-0.0412769	-0.0385291	-0.0418613	-0.041339	-0.0385912
368.586	0.0214372	0.0176825	0.0354925	-0.0060476	-0.00603703	-0.00392732	-0.0274848	-0.0274742	-0.0253645	-0.0237301	-0.0237195	-0.0216098	-0.0415401	-0.0415295	-0.0394198	0.0169	0.01695	0.01674	0.02198	0.02203	0.02182	0.01273	0.01277	0.01257	-0.0443848	-0.0444242	-0.0421045	-0.0457101	-0.0457495	-0.0434298	-0.0457848	-0.0458142	-0.0435045
369.55	0.0245782	0.0219483	0.0382304	-0.00718562	-0.00809937	-0.00817267	-0.0317638	-0.0326776	-0.0327509	-0.029134	-0.0300477	-0.030121	-0.045416	-0.0463297	-0.046403	0.01667	0.01674	0.01655	0.02169	0.02176	0.02157	0.01252	0.01259	0.0124	-0.0484338	-0.0494176	-0.0493009	-0.050824	-0.0518077	-0.051691	-0.0511302	-0.0521139	-0.0519972
370.514	0.0277487	0.0260722	0.0403998	-0.00836128	-0.00976884	-0.0121006	-0.03611	-0.0375175	-0.0398493	-0.0344335	-0.0358411	-0.0381728	-0.0487611	-0.0501686	-0.0525004	0.01643	0.01651	0.01634	0.02139	0.02147	0.0213	0.0123	0.01238	0.01221	-0.05254	-0.0540275	-0.0561893	-0.0558235	-0.0573111	-0.0594728	-0.0561555	-0.0576431	-0.0598048
371.478	0.0301695	0.0291748	0.0410964	-0.00919584	-0.00956146	-0.0126073	-0.0393653	-0.0397309	-0.0427768	-0.0383706	-0.0387362	-0.0417821	-0.0502923	-0.0506579	-0.0537038	0.01617	0.01627	0.01612	0.02107	0.02117	0.02102	0.01206	0.01216	0.01201	-0.0555353	-0.0560009	-0.0588968	-0.0594406	-0.0599062	-0.0628021	-0.0590572	-0.0595228	-0.0624187
372.443	0.0312237	0.030565	0.0401806	-0.0103659	-0.00925253	-0.0122343	-0.0415896	-0.0404762	-0.043458	-0.0409309	-0.0398175	-0.0427993	-0.0505465	-0.0494332	-0.0524149	0.0159	0.01602	0.01588	0.02074	0.02086	0.02072	0.01181	0.01193	0.01179	-0.0574896	-0.0564962	-0.059338	-0.0616709	-0.0606775	-0.0635193	-0.060425	-0.0594316	-0.0622734
373.407	0.0298249	0.0290494	0.0370279	-0.0127246	-0.0103998	-0.0125374	-0.0425495	-0.0402247	-0.0423623	-0.0417741	-0.0394492	-0.0415869	-0.0497525	-0.0474277	-0.0495653	0.01561	0.01575	0.01563	0.02039	0.02053	0.02041	0.01154	0.01168	0.01156	-0.0581595	-0.0559747	-0.0579923	-0.0621641	-0.0599792	-0.0619969	-0.0603094	-0.0581245	-0.0601421
374.371	0.0266025	0.025256	0.0321883	-0.0153637	-0.012172	-0.0133697	-0.0419662	-0.0387745	-0.0399722	-0.0406197	-0.037428	-0.0386258	-0.0475519	-0.0443603	-0.045558	0.01531	0.01546	0.01537	0.02003	0.02018	0.02008	0.01126	0.01142	0.01132	-0.0572762	-0.0542345	-0.0553422	-0.0606497	-0.057608	-0.0587058	-0.0584846	-0.0554529	-0.0565507
375.335	0.02151	0.0190026	0.0257266	-0.0177852	-0.0144974	-0.0153315	-0.0392952	-0.0360074	-0.0368415	-0.0367878	-0.0334999	-0.034334	-0.0435119	-0.040224	-0.0410581	0.01499	0.01517	0.01509	0.01965	0.01983	0.01975	0.01097	0.01114	0.01106	-0.0542852	-0.0511774	-0.0519315	-0.0564378	-0.0533299	-0.054084	-0.0545163	-0.0513984	-0.0521525
376.3	0.0154883	0.0115262	0.0184734	-0.0196108	-0.0166559	-0.0177373	-0.035099	-0.0321441	-0.0332256	-0.031137	-0.0281821	-0.0292636	-0.0380842	-0.0351293	-0.0362107	0.01467	0.01486	0.01479	0.01927	0.01946	0.01939	0.01066	0.01085	0.01079	-0.049769	-0.0470041	-0.0480156	-0.050407	-0.0476421	-0.0486536	-0.049051	-0.0462861	-0.0473075
377.264	0.00919755	0.00348575	0.0109932	-0.0198776	-0.0177341	-0.0203707	-0.0290752	-0.0269317	-0.0295683	-0.0233634	-0.0212199	-0.0238565	-0.0308708	-0.0287273	-0.0313639	0.01433	0.01454	0.01449	0.01887	0.01908	0.01903	0.01035	0.01055	0.01051	-0.0434052	-0.0414717	-0.0440583	-0.0422334	-0.0402999	-0.0428865	-0.0418375	-0.0398941	-0.0424907
378.228	0.00343312	-0.00356549	0.00414857	-0.0198404	-0.0182403	-0.0224259	-0.0232735	-0.0216734	-0.025859	-0.0162749	-0.0146748	-0.0188604	-0.023989	-0.0223889	-0.0265745	0.01398	0.0142	0.01417	0.01846	0.01869	0.01866	0.01002	0.01024	0.01021	-0.0372535	-0.0358734	-0.040029	-0.0347349	-0.0333648	-0.0375204	-0.0352045	-0.0338245	-0.0379801
379.192	-0.000628876	-0.00725392	-0.000908228	-0.0208537	-0.0180071	-0.0226739	-0.0202248	-0.0173782	-0.022045	-0.0135997	-0.0107532	-0.01542	-0.0199454	-0.0170989	-0.0217657	0.01362	0.01386	0.01385	0.01804	0.01829	0.01827	0.00968	0.00992	0.00991	-0.0338448	-0.0312382	-0.035895	-0.0316397	-0.0290432	-0.03369	-0.0323058	-0.0296992	-0.034356
380.157	-0.00347083	-0.00938124	-0.00448146	-0.0216549	-0.0181471	-0.0221673	-0.0181841	-0.0146763	-0.0186964	-0.0122737	-0.00876588	-0.012786	-0.0171735	-0.0136657	-0.0176858	0.01325	0.01351	0.01351	0.01761	0.01787	0.01788	0.00933	0.00959	0.00959	-0.0314341	-0.0281863	-0.0322064	-0.0298837	-0.0266359	-0.030666	-0.0304844	-0.0272366	-0.0312568
381.121	-0.00497487	-0.0109476	-0.00615975	-0.0210295	-0.0205218	-0.0213818	-0.0160546	-0.015547	-0.0164069	-0.0100819	-0.00957421	-0.0104341	-0.0148697	-0.0143621	-0.015222	0.01286	0.01314	0.01316	0.01717	0.01745	0.01747	0.00897	0.00925	0.00927	-0.0289146	-0.028687	-0.0295669	-0.0272519	-0.0270242	-0.0279041	-0.0277032	-0.0274755	-0.0283555
382.085	-0.00576567	-0.0119841	-0.00693776	-0.0201884	-0.0227171	-0.0208183	-0.0144228	-0.0169514	-0.0150526	-0.00820435	-0.010733	-0.00883423	-0.0132507	-0.0157793	-0.0138806	0.01247	0.01277	0.01281	0.01673	0.01702	0.01706	0.0086	0.0089	0.00893	-0.0268928	-0.0297214	-0.0278626	-0.0249343	-0.027753	-0.0258942	-0.0252474	-0.0280761	-0.0262073
383.049	-0.00647862	-0.0128959	-0.00774137	-0.0201129	-0.0224214	-0.0214947	-0.0136342	-0.0159428	-0.0150161	-0.00721699	-0.00952558	-0.00859884	-0.0123715	-0.0146801	-0.0137533	0.01208	0.01239	0.01244	0.01627	0.01658	0.01664	0.00823	0.00854	0.00859	-0.0257142	-0.0283328	-0.0274561	-0.023487	-0.0261056	-0.0252388	-0.0238995	-0.0265181	-0.0256414
384.014	-0.00696366	-0.0135606	-0.00836547	-0.020278	-0.0211883	-0.0223361	-0.0133144	-0.0142247	-0.0153724	-0.00671748	-0.00762775	-0.00877552	-0.0119126	-0.0128228	-0.0139706	0.01167	0.012	0.01207	0.01581	0.01614	0.0162	0.00784	0.00817	0.00824	-0.0249844	-0.0262247	-0.0274424	-0.0225275	-0.0237678	-0.0249755	-0.0231411	-0.0243814	-0.0255992
384.978	-0.00727954	-0.014018	-0.00897844	-0.0205371	-0.0196166	-0.0225807	-0.0132575	-0.0123371	-0.0153011	-0.00651909	-0.00559861	-0.00856269	-0.0115587	-0.0106382	-0.0136022	0.01125	0.0116	0.01168	0.01534	0.01568	0.01577	0.00745	0.0078	0.00788	-0.0245075	-0.0239371	-0.0269811	-0.0218591	-0.0212786	-0.0243327	-0.0228436	-0.0222731	-0.0253172
385.942	-0.00743518	-0.0141868	-0.00938561	-0.0207377	-0.0182583	-0.0223071	-0.0133025	-0.0108231	-0.0148719	-0.00655095	-0.00407152	-0.00812032	-0.0113521	-0.00887267	-0.0129215	0.01083	0.0112	0.01129	0.01486	0.01522	0.01532	0.00705	0.00742	0.00751	-0.0241325	-0.0220231	-0.0261619	-0.0214109	-0.0192915	-0.0234403	-0.0227203	-0.0206108	-0.0247496
386.906	-0.00740857	-0.0139822	-0.00946483	-0.0205996	-0.0180578	-0.0209722	-0.013191	-0.0106493	-0.0135637	-0.00661734	-0.00407559	-0.00699	-0.0111348	-0.00859301	-0.0115074	0.0104	0.01079	0.0109	0.01437	0.01476	0.01487	0.00664	0.00703	0.00714	-0.023591	-0.0214393	-0.0244637	-0.0209873	-0.0188356	-0.02186	-0.0224375	-0.0202858	-0.0233102
387.87	-0.00735131	-0.0134538	-0.00916698	-0.02036	-0.0184365	-0.0196791	-0.0130087	-0.0110852	-0.0123278	-0.00690621	-0.00498271	-0.00622532	-0.011193	-0.00926953	-0.0105121	0.00997	0.01037	0.0105	0.01388	0.01428	0.01441	0.00623	0.00663	0.00676	-0.0229787	-0.0214552	-0.0228278	-0.0207862	-0.0192627	-0.0206353	-0.0220271	-0.0205036	-0.0218762
388.835	-0.00747157	-0.0124423	-0.00813402	-0.0201779	-0.0192768	-0.0195844	-0.0127063	-0.0118052	-0.0121128	-0.00773551	-0.00683446	-0.00714207	-0.0120438	-0.0111428	-0.0114504	0.00953	0.00995	0.01009	0.01339	0.0138	0.01394	0.00581	0.00623	0.00637	-0.0222363	-0.0217552	-0.0222028	-0.0211255	-0.0206345	-0.0210821	-0.0212657	-0.0207846	-0.0212322
389.799	-0.00757756	-0.0114885	-0.00717057	-0.020008	-0.0201394	-0.0199838	-0.0124304	-0.0125619	-0.0124062	-0.00851947	-0.00865094	-0.00849528	-0.0128374	-0.0129689	-0.0128132	0.00908	0.00952	0.00967	0.01288	0.01332	0.01347	0.00539	0.00583	0.00598	-0.0215104	-0.0220819	-0.0220762	-0.0213995	-0.0219709	-0.0219653	-0.0205348	-0.0211062	-0.0211006
390.763	-0.00752329	-0.0112167	-0.00725572	-0.0197679	-0.0203726	-0.0206373	-0.0122446	-0.0128494	-0.013114	-0.00855118	-0.00915591	-0.00942057	-0.0125122	-0.0131169	-0.0133816	0.00863	0.00908	0.00925	0.01238	0.01283	0.013	0.00496	0.00541	0.00558	-0.0208746	-0.0219294	-0.022364	-0.0209312	-0.0219859	-0.0224206	-0.0201547	-0.0212094	-0.0216441
391.727	-0.00737955	-0.0112163	-0.007508	-0.0197283	-0.0204963	-0.0213083	-0.0123487	-0.0131167	-0.0139288	-0.00851196	-0.00927998	-0.010092	-0.0122203	-0.0129883	-0.0138003	0.00818	0.00865	0.00883	0.01187	0.01234	0.01252	0.00453	0.005	0.00518	-0.0205287	-0.0217667	-0.0227588	-0.020382	-0.02162	-0.022612	-0.0200457	-0.0212837	-0.0222758
392.692	-0.00711441	-0.011289	-0.00721777	-0.0203124	-0.0208814	-0.0215852	-0.013198	-0.013767	-0.0144708	-0.0090234	-0.0095924	-0.0102962	-0.0130946	-0.0136636	-0.0143674	0.00772	0.0082	0.0084	0.01135	0.01184	0.01203	0.00409	0.00458	0.00477	-0.020918	-0.021967	-0.0228708	-0.0203734	-0.0214324	-0.0223262	-0.0203899	-0.0214489	-0.0223427
393.656	-0.00688999	-0.0114217	-0.00684874	-0.0209794	-0.0213226	-0.021753	-0.0140895	-0.0144326	-0.014863	-0.00955773	-0.00990092	-0.0103313	-0.0141307	-0.0144739	-0.0149043	0.00725	0.00776	0.00796	0.01084	0.01134	0.01155	0.00365	0.00415	0.00436	-0.0213395	-0.0221926	-0.022823	-0.0203977	-0.0212409	-0.0218813	-0.0206823	-0.0215255	-0.0221659
394.62	-0.00691046	-0.0115509	-0.00664648	-0.0213207	-0.0218333	-0.0220468	-0.0144103	-0.0149228	-0.0151364	-0.00976985	-0.0102824	-0.010496	-0.0146742	-0.0151868	-0.0154003	0.00679	0.00731	0.00753	0.01032	0.01084	0.01106	0.00321	0.00373	0.00395	-0.0212003	-0.0222328	-0.0226664	-0.0200899	-0.0211224	-0.021556	-0.0204132	-0.0214458	-0.0218793
395.584	-0.00701777	-0.0116298	-0.00655586	-0.0213631	-0.0221285	-0.0222053	-0.0143453	-0.0151108	-0.0151875	-0.00973331	-0.0104988	-0.0105755	-0.0148072	-0.0155727	-0.0156494	0.00632	0.00685	0.00709	0.00979	0.01033	0.01056	0.00276	0.0033	0.00353	-0.0206653	-0.0219608	-0.0222775	-0.0195233	-0.0208288	-0.0211355	-0.0197499	-0.0210553	-0.0213621
396.549	-0.00718713	-0.0115887	-0.00667464	-0.0210043	-0.0220244	-0.0221849	-0.0138172	-0.0148372	-0.0149978	-0.00941557	-0.0104356	-0.0105962	-0.0143297	-0.0153497	-0.0155103	0.00584	0.0064	0.00664	0.00927	0.00982	0.01007	0.00231	0.00286	0.00311	-0.0196572	-0.0212372	-0.0216378	-0.0186856	-0.0202556	-0.0206662	-0.0186664	-0.0202364	-0.020647
397.513	-0.007223	-0.0114329	-0.00678963	-0.0202226	-0.0212312	-0.0215668	-0.0129996	-0.0140082	-0.0143438	-0.00878972	-0.00979827	-0.0101339	-0.013433	-0.0144415	-0.0147772	0.00537	0.00594	0.0062	0.00874	0.00931	0.00957	0.00186	0.00243	0.00268	-0.0183696	-0.0199482	-0.0205438	-0.0175297	-0.0191083	-0.0197039	-0.0172928	-0.0188714	-0.0194571
398.477	-0.00686506	-0.0110867	-0.00674817	-0.0192797	-0.019424	-0.0199608	-0.0124146	-0.012559	-0.0130957	-0.00819302	-0.00833736	-0.00887409	-0.0125315	-0.0126759	-0.0132126	0.00489	0.00548	0.00575	0.00821	0.0088	0.00907	0.0014	0.00199	0.00226	-0.0173046	-0.018039	-0.0188457	-0.016403	-0.0171374	-0.0179441	-0.0160835	-0.0168178	-0.0176245
399.441	-0.00628283	-0.0107223	-0.00646644	-0.0172226	-0.0165247	-0.0172373	-0.0109398	-0.0102419	-0.0109545	-0.0065003	-0.00580238	-0.00651501	-0.0107562	-0.0100582	-0.0107709	0.00442	0.00502	0.0053	0.00768	0.00828	0.00856	0.000945814	0.00155	0.00183	-0.0153598	-0.0152619	-0.0162545	-0.0141803	-0.0140824	-0.015075	-0.0140157	-0.013922	-0.0149146
400.406	-0.00546229	-0.0105544	-0.00565232	-0.0132377	-0.0124189	-0.0132278	-0.00777536	-0.00695664	-0.00776555	-0.00268324	-0.00186451	-0.00267342	-0.00758533	-0.00676661	-0.00757552	0.00394	0.00456	0.00485	0.00715	0.00777	0.00806	0.000489009	0.00111	0.0014	-0.0117154	-0.0115166	-0.0126155	-0.00983324	-0.00963451	-0.0107334	-0.0103204	-0.0101227	-0.0112216
401.37	-0.00469371	-0.0103805	-0.00477807	-0.00716908	-0.00688982	-0.0076601	-0.00247537	-0.00219611	-0.00296639	0.00321147	0.00349073	0.00272045	-0.00239101	-0.00211175	-0.00288203	0.00346	0.00409	0.0044	0.00661	0.00725	0.00756	3.13326e-05	0.000668887	0.000974392	-0.00593537	-0.00628611	-0.00736639	-0.00339853	-0.00375927	-0.00483955	-0.00463092	-0.00498922	-0.006065
402.334	-0.00443971	-0.0101934	-0.00442724	0.00194213	0.000332493	-0.000227868	0.00638183	0.0047722	0.00421184	0.0121355	0.0105259	0.00996549	0.00636937	0.00475973	0.00419937	0.00298	0.00363	0.00395	0.00608	0.00674	0.00705	-0.000426941	0.000227026	0.000544033	0.00340183	0.0011422	0.00026184	0.00605548	0.00378585	0.00291549	0.00433162	0.00206802	0.00119065
403.298	-0.00416923	-0.00962221	-0.00397383	0.0125	0.00920343	0.0091355	0.0166692	0.0133727	0.0133047	0.0221222	0.0188256	0.0187577	0.0164738	0.0131773	0.0131093	0.0025	0.00317	0.00349	0.00555	0.00622	0.00655	-0.000885402	-0.000215093	0.000113243	0.0141692	0.0102027	0.00981474	0.0165722	0.0126056	0.0122077	0.0145956	0.0106288	0.0102325
404.262	-0.00374341	-0.00839218	-0.00327128	0.0232005	0.0200826	0.0211359	0.0269439	0.023826	0.0248793	0.0315926	0.0284748	0.0295281	0.0264717	0.0233539	0.0244072	0.00201	0.0027	0.00304	0.00502	0.0057	0.00604	-0.00134	-0.000657211	-0.000317716	0.0249339	0.021126	0.0218393	0.0265726	0.0227748	0.0234881	0.0248826	0.021082	0.0217957
405.227	-0.00244834	-0.0062088	-0.00146484	0.0341265	0.0320272	0.0341619	0.0365749	0.0344756	0.0366102	0.0403353	0.038236	0.0403707	0.0355914	0.0334921	0.0356267	0.00153	0.00224	0.00259	0.00448	0.00519	0.00554	-0.0018	-0.0011	-0.000748587	0.0350449	0.0322356	0.0340202	0.0358553	0.033046	0.0348307	0.0343905	0.0315912	0.0333744
406.191	0.000204804	-0.00291863	0.0021978	0.0451214	0.0446377	0.0472844	0.0449166	0.0444329	0.0470796	0.04804	0.0475563	0.050203	0.0429236	0.0424399	0.0450866	0.00106	0.00177	0.00214	0.00395	0.00467	0.00503	-0.00226	-0.00154	-0.00118	0.0438566	0.0426629	0.0449396	0.04409	0.0428863	0.045173	0.0423164	0.0411127	0.0433994
407.155	0.00503015	0.00217634	0.00817045	0.0556002	0.0566436	0.0591622	0.0505701	0.0516135	0.054132	0.0534239	0.0544673	0.0569858	0.0474298	0.0484732	0.0509917	0.000577132	0.00131	0.00168	0.00342	0.00416	0.00453	-0.00272	-0.00198	-0.00161	0.0499929	0.0503035	0.052452	0.0500039	0.0503073	0.0524558	0.0473445	0.0476479	0.0497964
408.119	0.0128345	0.00952094	0.0173206	0.0654924	0.0670715	0.068243	0.0526579	0.054237	0.0554085	0.0559715	0.0575506	0.0587221	0.0481718	0.049751	0.0509224	0.000100055	0.000851015	0.00123	0.0029	0.00365	0.00403	-0.00317	-0.00242	-0.00204	0.0525579	0.053386	0.0541785	0.0530715	0.0539006	0.0546921	0.0484453	0.0492745	0.0500659
409.084	0.0241287	0.0200282	0.0291594	0.0730992	0.0746312	0.0742302	0.0489705	0.0505025	0.0501014	0.053071	0.054603	0.054202	0.0439398	0.0454718	0.0450708	-0.000375421	0.000391446	0.000784298	0.00237	0.00314	0.00353	-0.00362	-0.00286	-0.00246	0.0493459	0.050111	0.0493171	0.050701	0.051463	0.050672	0.0439429	0.0447149	0.0439138
410.048	0.0413304	0.0365255	0.0449521	0.0763176	0.0774999	0.0757836	0.0349871	0.0361694	0.0344532	0.039792	0.0409743	0.0392581	0.0313654	0.0325477	0.0308315	-0.000849083	-6.63842e-05	0.000336668	0.00185	0.00263	0.00303	-0.00408	-0.00329	-0.00289	0.0358362	0.0362358	0.0341165	0.037942	0.0383443	0.0362281	0.029691	0.0300833	0.027967
411.012	0.059526	0.0537145	0.0603043	0.0762894	0.0763017	0.0744809	0.0167634	0.0167757	0.0149548	0.0225749	0.0225872	0.0207663	0.0159852	0.0159975	0.0141766	-0.00132	-0.000522267	-0.000109166	0.00132	0.00212	0.00254	-0.00453	-0.00373	-0.00332	0.0180834	0.017298	0.015064	0.0212549	0.0204672	0.0182263	0.0120602	0.0112725	0.00904165
411.976	0.0753017	0.0677686	0.0713087	0.0734765	0.0703761	0.0717674	-0.00182522	-0.00492565	-0.00353432	0.00570789	0.00260746	0.00399879	0.00216781	-0.000932623	0.00045871	-0.00179	-0.00097586	-0.000552859	0.000804998	0.00162	0.00204	-0.00497	-0.00416	-0.00374	-3.52203e-05	-0.00394979	-0.00298146	0.00490289	0.000987459	0.00195879	-0.00454049	-0.00845092	-0.00747959
412.941	0.0865757	0.0771	0.0777684	0.0678166	0.0617554	0.0666993	-0.0187591	-0.0248203	-0.0198765	-0.0092834	-0.0153446	-0.0104007	-0.00995181	-0.016013	-0.0110691	-0.00226	-0.00143	-0.000994212	0.000288386	0.00112	0.00155	-0.00542	-0.00459	-0.00416	-0.0164991	-0.0233903	-0.0188823	-0.00957179	-0.0164646	-0.0119507	-0.0183022	-0.0251934	-0.0206796
413.905	0.0896318	0.0781525	0.0777779	0.0587531	0.0518458	0.0581013	-0.0308787	-0.037786	-0.0315304	-0.0193994	-0.0263067	-0.0200511	-0.0190248	-0.0259321	-0.0196766	-0.00272	-0.00188	-0.00143	-0.000225275	0.000619973	0.00106	-0.00586	-0.00502	-0.00457	-0.0281587	-0.035906	-0.0301004	-0.0191741	-0.0269267	-0.0211111	-0.0255931	-0.0333404	-0.0275348
414.869	0.0859599	0.0730051	0.0725557	0.0482313	0.0418664	0.0481129	-0.0377286	-0.0440934	-0.0378469	-0.0247738	-0.0311387	-0.0248922	-0.0243244	-0.0306893	-0.0244427	-0.00318	-0.00232	-0.00187	-0.000735649	0.000125035	0.000576864	-0.0063	-0.00544	-0.00499	-0.0345486	-0.0417734	-0.0359769	-0.0240382	-0.0312637	-0.025469	-0.027583	-0.0348078	-0.0290113
415.833	0.0747017	0.0615359	0.0618742	0.0375861	0.0334357	0.0380734	-0.0371156	-0.0412659	-0.0366283	-0.0239498	-0.0281001	-0.0234625	-0.0242881	-0.0284385	-0.0238009	-0.00364	-0.00276	-0.0023	-0.00124	-0.000366531	9.46252e-05	-0.00674	-0.00586	-0.0054	-0.0334756	-0.0385059	-0.0343283	-0.0227098	-0.0277336	-0.0235571	-0.0235507	-0.028581	-0.0244034
416.798	0.059186	0.0467915	0.0481663	0.0280918	0.0267626	0.0292077	-0.0310943	-0.0324234	-0.0299783	-0.0186998	-0.020029	-0.0175838	-0.0200745	-0.0214037	-0.0189586	-0.00409	-0.0032	-0.00273	-0.00175	-0.00085456	-0.000384213	-0.00717	-0.00628	-0.00581	-0.0270043	-0.0292234	-0.0272483	-0.0169498	-0.0191744	-0.0171996	-0.0155583	-0.0177774	-0.0158023
417.762	0.0413335	0.0309102	0.0329531	0.0214187	0.022748	0.023158	-0.0199147	-0.0185855	-0.0181755	-0.00949144	-0.00816218	-0.00775216	-0.0115344	-0.0102051	-0.00979509	-0.00454	-0.00364	-0.00316	-0.00225	-0.00134	-0.000859342	-0.0076	-0.00669	-0.00621	-0.0153747	-0.0149455	-0.0150155	-0.00724144	-0.00682218	-0.00689282	-0.00469578	-0.00427653	-0.00434651
418.726	0.0245109	0.016496	0.0187417	0.0177133	0.0209343	0.0200129	-0.00679765	-0.00357659	-0.00449805	0.00121726	0.00443832	0.00351686	-0.0010284	0.00219266	0.0012712	-0.00499	-0.00407	-0.00358	-0.00274	-0.00182	-0.00133	-0.00803	-0.0071	-0.00662	-0.00180765	0.000493415	-0.000918053	0.00395726	0.00625832	0.00484686	0.00690143	0.00919249	0.00779102
419.69	0.013357	0.00755777	0.00869308	0.0186049	0.0211354	0.0211377	0.00524791	0.00777839	0.00778069	0.0110472	0.0135776	0.0135799	0.00991185	0.0124423	0.0124446	-0.00543	-0.0045	-0.004	-0.00323	-0.00229	-0.0018	-0.00845	-0.00751	-0.00701	0.0106779	0.0122784	0.0117807	0.0142772	0.0158676	0.0153799	0.0167463	0.0183368	0.0178391
420.654	0.00597694	0.00201982	0.00236619	0.021314	0.023438	0.0243439	0.0153371	0.017461	0.018367	0.0192942	0.0214182	0.0223241	0.0189478	0.0210718	0.0219777	-0.00587	-0.00492	-0.00441	-0.00372	-0.00277	-0.00226	-0.00886	-0.00791	-0.00741	0.0212071	0.022381	0.022777	0.0230142	0.0241882	0.0245841	0.024764	0.0259379	0.0263439
421.619	0.00268667	-0.000379292	0.00143285	0.0224342	0.0280968	0.0272386	0.0197475	0.0254102	0.0245519	0.0228135	0.0284761	0.0276179	0.0210013	0.026664	0.0258057	-0.0063	-0.00534	-0.00482	-0.0042	-0.00323	-0.00272	-0.00928	-0.00831	-0.0078	0.0260475	0.0307502	0.0293719	0.0270135	0.0317061	0.0303379	0.0285793	0.033272	0.0319038
422.583	0.00149229	-0.00107353	0.0027152	0.0254751	0.0344215	0.0318	0.0239828	0.0329292	0.0303077	0.0265487	0.035495	0.0328735	0.0227599	0.0317063	0.0290848	-0.00673	-0.00575	-0.00523	-0.00468	-0.0037	-0.00317	-0.00969	-0.00871	-0.00818	0.0307128	0.0386792	0.0355377	0.0312287	0.039195	0.0360435	0.0326566	0.0406229	0.0374714
423.547	0.000276341	-0.00171942	0.00320809	0.0341587	0.0420755	0.0400316	0.0338824	0.0417991	0.0397553	0.0358781	0.0437949	0.041751	0.0309506	0.0388674	0.0368235	-0.00716	-0.00616	-0.00563	-0.00515	-0.00415	-0.00362	-0.01009	-0.00909	-0.00856	0.0410424	0.0479591	0.0453853	0.0410281	0.0479449	0.045371	0.0421518	0.0490686	0.0464947
424.511	-0.000274635	-0.00191078	0.00406524	0.0444424	0.0502514	0.049465	0.0447171	0.050526	0.0497396	0.0463532	0.0521622	0.0513758	0.0403772	0.0461861	0.0453997	-0.00758	-0.00657	-0.00603	-0.00562	-0.00461	-0.00407	-0.01049	-0.00948	-0.00894	0.0522971	0.057096	0.0557696	0.0519732	0.0567722	0.0554458	0.0526642	0.0574632	0.0561367
425.476	-0.000189908	-0.00193728	0.00536799	0.0532598	0.0579591	0.058231	0.0534497	0.058149	0.0584209	0.0551971	0.0598964	0.0601682	0.0478918	0.0525911	0.052863	-0.00799	-0.00697	-0.00642	-0.00608	-0.00505	-0.00451	-0.01088	-0.00986	-0.00931	0.0614397	0.065119	0.0648409	0.0612771	0.0649464	0.0646782	0.0612689	0.0649483	0.0646701
426.44	0.000560545	-0.00136786	0.00732827	0.0614047	0.0654101	0.0665348	0.0608442	0.0648496	0.0659743	0.0627726	0.066778	0.0679027	0.0540765	0.0580819	0.0592065	-0.0084	-0.00736	-0.00681	-0.00653	-0.00549	-0.00494	-0.01127	-0.01023	-0.00968	0.0692442	0.0722096	0.0727843	0.0693026	0.072268	0.0728427	0.0686442	0.0716095	0.0721842
427.404	0.00200168	7.96985e-05	0.010109	0.068377	0.0724495	0.0738213	0.0663753	0.0704478	0.0718196	0.0682973	0.0723698	0.0737416	0.058268	0.0623405	0.0637123	-0.0088	-0.00775	-0.00719	-0.00698	-0.00593	-0.00537	-0.01165	-0.0106	-0.01004	0.0751753	0.0781978	0.0790096	0.0752773	0.0782998	0.0791116	0.0742529	0.0772754	0.0780872
428.368	0.00411942	0.00256214	0.0139385	0.0749927	0.0791864	0.0805026	0.0708733	0.075067	0.0763831	0.0724306	0.0766242	0.0779404	0.0610542	0.0652478	0.066564	-0.0092	-0.00813	-0.00756	-0.00743	-0.00636	-0.00579	-0.01203	-0.01096	-0.01039	0.0800733	0.083197	0.0839431	0.0798606	0.0829842	0.0837304	0.0787759	0.0818995	0.0826457
429.332	0.00691247	0.00649511	0.0189894	0.082205	0.0858524	0.0868768	0.0752925	0.07894	0.0799643	0.0757099	0.0793573	0.0803817	0.0632156	0.066863	0.0678874	-0.00959	-0.00851	-0.00793	-0.00787	-0.00679	-0.00621	-0.0124	-0.01132	-0.01074	0.0848825	0.08745	0.0878943	0.0835799	0.0861473	0.0865917	0.0830428	0.0856102	0.0860546
430.297	0.0103674	0.0113841	0.0255921	0.0891026	0.091926	0.0927311	0.0787351	0.0815585	0.0823637	0.0777184	0.0805418	0.081347	0.0635104	0.0663338	0.067139	-0.00998	-0.00888	-0.0083	-0.0083	-0.0072	-0.00662	-0.01277	-0.01168	-0.01109	0.0887151	0.0904385	0.0906637	0.0860184	0.0877418	0.087967	0.0860289	0.0877623	0.0879774
431.261	0.014381	0.0167284	0.0340455	0.0949515	0.0966393	0.0979394	0.0805705	0.0822583	0.0835584	0.0782231	0.079911	0.0812111	0.060906	0.0625939	0.063894	-0.01036	-0.00925	-0.00866	-0.00873	-0.00762	-0.00702	-0.01313	-0.01202	-0.01143	0.0909305	0.0915083	0.0922184	0.0869531	0.087531	0.0882311	0.086811	0.0873888	0.0880989
432.225	0.0192216	0.0229624	0.0446174	0.100173	0.100962	0.102539	0.0809513	0.0817404	0.0833173	0.0772105	0.0779996	0.0795765	0.0555555	0.0563446	0.0579215	-0.01074	-0.00961	-0.00901	-0.00915	-0.00802	-0.00742	-0.01349	-0.01236	-0.01176	0.0916913	0.0913504	0.0923273	0.0863605	0.0860196	0.0869965	0.0858744	0.0855336	0.0865105
433.19	0.025125	0.0303404	0.0578782	0.105	0.105933	0.106512	0.0798752	0.0808082	0.0813867	0.0746598	0.0755928	0.0761713	0.0471221	0.0480551	0.0486336	-0.0111	-0.00997	-0.00936	-0.00956	-0.00842	-0.00782	-0.01383	-0.0127	-0.01209	0.0909752	0.0907782	0.0907467	0.0842198	0.0840128	0.0839913	0.0833372	0.0831402	0.0831088
434.154	0.0320849	0.0389026	0.0732194	0.109262	0.110576	0.109896	0.0771771	0.0784908	0.0778116	0.0703594	0.0716731	0.0709939	0.0360426	0.0373563	0.0366771	-0.01146	-0.01031	-0.0097	-0.00997	-0.00882	-0.0082	-0.01418	-0.01303	-0.01241	0.0886371	0.0888008	0.0875116	0.0803294	0.0804931	0.0791939	0.0793283	0.079492	0.0781928
435.118	0.0405032	0.0492087	0.0908994	0.113184	0.114482	0.112858	0.072681	0.0739788	0.072355	0.0639754	0.0652733	0.0636494	0.0222848	0.0235826	0.0219587	-0.01182	-0.01066	-0.01003	-0.01037	-0.0092	-0.00858	-0.01451	-0.01335	-0.01273	0.084501	0.0846388	0.082385	0.0743454	0.0744733	0.0722294	0.0739205	0.0740583	0.0718145
436.082	0.0493908	0.0599543	0.108888	0.115807	0.116983	0.114999	0.066416	0.0675918	0.0656085	0.0558524	0.0570283	0.0550449	0.00691835	0.00809419	0.00611087	-0.01217	-0.01099	-0.01036	-0.01076	-0.00958	-0.00896	-0.01484	-0.01366	-0.01304	0.078586	0.0785818	0.0759685	0.0666124	0.0666083	0.0640049	0.0672592	0.067255	0.0646517
437.046	0.0582616	0.0704588	0.125902	0.116289	0.117243	0.116145	0.0580278	0.0589816	0.0578839	0.0458306	0.0467843	0.0456866	-0.00961224	-0.00865851	-0.00975616	-0.01251	-0.01132	-0.01068	-0.01115	-0.00996	-0.00932	-0.01516	-0.01397	-0.01334	0.0705378	0.0703016	0.0685639	0.0569806	0.0567443	0.0550066	0.0591776	0.0589414	0.0572137
438.011	0.0660088	0.0794105	0.139962	0.114499	0.115351	0.115793	0.0484901	0.0493421	0.0497837	0.0350884	0.0359404	0.036382	-0.0254633	-0.0246113	-0.0241696	-0.01285	-0.01164	-0.011	-0.01153	-0.01032	-0.00968	-0.01548	-0.01428	-0.01363	0.0613401	0.0609821	0.0607837	0.0466184	0.0462604	0.046062	0.0506345	0.0502865	0.0500782
438.975	0.0716166	0.0855375	0.149032	0.109813	0.110924	0.113498	0.0381963	0.0393073	0.0418811	0.0242754	0.0253864	0.0279603	-0.0392196	-0.0381086	-0.0355348	-0.01317	-0.01196	-0.01131	-0.0119	-0.01068	-0.01004	-0.01579	-0.01457	-0.01392	0.0513663	0.0512673	0.0531911	0.0361754	0.0360664	0.0380003	0.0421231	0.0420141	0.0439379
439.939	0.074326	0.0880392	0.152009	0.102859	0.104535	0.108902	0.0285325	0.0302087	0.0345757	0.0148193	0.0164955	0.0208625	-0.0491502	-0.0474741	-0.0431071	-0.01349	-0.01226	-0.01161	-0.01227	-0.01104	-0.01038	-0.01609	-0.01486	-0.01421	0.0420225	0.0424687	0.0461857	0.0270893	0.0275355	0.0312425	0.0348233	0.0352694	0.0389864
440.903	0.0727289	0.0853092	0.146419	0.0937126	0.0966971	0.101345	0.0209838	0.0239682	0.028616	0.0084035	0.011388	0.0160357	-0.0527065	-0.049722	-0.0450742	-0.01381	-0.01257	-0.0119	-0.01263	-0.01138	-0.01072	-0.01639	-0.01514	-0.01448	0.0347938	0.0365382	0.040516	0.0210335	0.022768	0.0267557	0.0302576	0.031992	0.0359798
441.868	0.0677573	0.0784928	0.13433	0.0834029	0.0872051	0.0912847	0.0156456	0.0194478	0.0235274	0.00491014	0.00871232	0.0127919	-0.0509268	-0.0471246	-0.043045	-0.01412	-0.01286	-0.01219	-0.01298	-0.01172	-0.01105	-0.01668	-0.01542	-0.01475	0.0297656	0.0323078	0.0357174	0.0178901	0.0204323	0.0238419	0.0279206	0.0304628	0.0338724
442.832	0.0591786	0.0672458	0.115695	0.0730519	0.0753911	0.078061	0.0138732	0.0162124	0.0188824	0.0058061	0.00814533	0.0108153	-0.0426428	-0.0403036	-0.0376336	-0.01442	-0.01315	-0.01247	-0.01332	-0.01205	-0.01138	-0.01696	-0.01569	-0.01502	0.0282932	0.0293624	0.0313524	0.0191261	0.0201953	0.0221953	0.0287163	0.0297855	0.0317855
443.796	0.0490783	0.0544308	0.0943774	0.0624514	0.0631534	0.0643662	0.0133732	0.0140751	0.0152879	0.0080206	0.00872252	0.00993532	-0.031926	-0.031224	-0.0300112	-0.01471	-0.01343	-0.01275	-0.01366	-0.01238	-0.0117	-0.01723	-0.01595	-0.01527	0.0280832	0.0275051	0.0280379	0.0216806	0.0211025	0.0216353	0.0299594	0.0293814	0.0299142
444.76	0.0391502	0.042456	0.0736666	0.0514019	0.0525173	0.0530203	0.0122517	0.0133671	0.0138701	0.00894586	0.0100613	0.0105643	-0.0222647	-0.0211493	-0.0206463	-0.015	-0.0137	-0.01302	-0.01399	-0.01269	-0.01201	-0.0175	-0.01621	-0.01552	0.0272517	0.0270671	0.0268901	0.0229359	0.0227513	0.0225743	0.0289287	0.0287541	0.0285671
445.724	0.0303357	0.0323413	0.0552408	0.0410008	0.0424341	0.0429794	0.010665	0.0120983	0.0126437	0.00865945	0.0100927	0.0106381	-0.01424	-0.0128068	-0.0122614	-0.01527	-0.01397	-0.01328	-0.01431	-0.013	-0.01231	-0.01776	-0.01645	-0.01576	0.025935	0.0260683	0.0259237	0.0229694	0.0230927	0.0229481	0.0266569	0.0267802	0.0266355
446.689	0.0244352	0.0263981	0.0423914	0.0325622	0.0322123	0.034142	0.008127	0.00777718	0.00970686	0.00616406	0.00581424	0.00774392	-0.00982928	-0.0101791	-0.00824942	-0.01554	-0.01423	-0.01353	-0.01462	-0.0133	-0.01261	-0.01801	-0.01669	-0.016	0.023667	0.0220072	0.0232369	0.0207841	0.0191142	0.0203539	0.0232096	0.0215398	0.0227794
447.653	0.0205661	0.0231603	0.0335696	0.0252371	0.0228053	0.026501	0.00467098	0.00223921	0.00593489	0.00207677	-0.000354996	0.00334068	-0.00833257	-0.0107643	-0.00706867	-0.01581	-0.01448	-0.01377	-0.01493	-0.0136	-0.0129	-0.01826	-0.01693	-0.01622	0.020481	0.0167192	0.0197049	0.0170068	0.013245	0.0162407	0.0187972	0.0150355	0.0180211
448.617	0.018782	0.0224301	0.0289703	0.0187828	0.0148497	0.0200774	7.79591e-07	-0.00393229	0.00129542	-0.00364731	-0.00758038	-0.00235267	-0.0101875	-0.0141205	-0.00889284	-0.01606	-0.01472	-0.01401	-0.01523	-0.01389	-0.01318	-0.0185	-0.01715	-0.01645	0.0160608	0.0107877	0.0153054	0.0115827	0.00630962	0.0108273	0.0134539	0.00817084	0.0126986
449.581	0.0180752	0.022714	0.0266535	0.0126944	0.0086032	0.0146849	-0.00538087	-0.00947204	-0.00339034	-0.0100196	-0.0141108	-0.0080291	-0.0139591	-0.0180503	-0.0119686	-0.01631	-0.01496	-0.01424	-0.01552	-0.01416	-0.01345	-0.01873	-0.01737	-0.01666	0.0109291	0.00548796	0.0108497	0.00550036	4.91938e-05	0.0054209	0.00771408	0.00226291	0.00763461
450.546	0.0174958	0.0224498	0.0249344	0.00605705	0.00507426	0.0103553	-0.0114387	-0.0124215	-0.00714048	-0.0163927	-0.0173755	-0.0120945	-0.0188773	-0.0198601	-0.014579	-0.01655	-0.01519	-0.01447	-0.0158	-0.01444	-0.01372	-0.01895	-0.01758	-0.01686	0.00511125	0.00276846	0.00732952	-0.000592724	-0.00293551	0.00162554	0.00175124	-0.000601547	0.00395951
451.51	0.0169236	0.0216455	0.0232426	-0.000142948	0.00264656	0.00645421	-0.0170665	-0.014277	-0.0104693	-0.0217884	-0.0189989	-0.0151913	-0.0233855	-0.020596	-0.0167884	-0.01679	-0.01541	-0.01468	-0.01608	-0.0147	-0.01397	-0.01917	-0.01779	-0.01706	-0.00027651	0.00113299	0.00421065	-0.00570842	-0.00429892	-0.00122126	-0.0032979	-0.0018884	0.00118926
452.474	0.0158649	0.019416	0.0199179	-0.00548124	-0.0001004	0.00222874	-0.0213461	-0.0159653	-0.0136362	-0.0248973	-0.0195164	-0.0171873	-0.0253991	-0.0200183	-0.0176892	-0.01701	-0.01562	-0.01489	-0.01635	-0.01496	-0.01422	-0.01937	-0.01798	-0.01725	-0.00433615	-0.000345313	0.00125383	-0.00854727	-0.00455643	-0.00296729	-0.00627503	-0.00228419	-0.00068505
453.438	0.0144902	0.0168786	0.0165452	-0.00918714	-0.00274568	-0.00193388	-0.0236774	-0.0172359	-0.0164241	-0.0260657	-0.0196243	-0.0188125	-0.0257323	-0.0192909	-0.018479	-0.01723	-0.01583	-0.01509	-0.01661	-0.0152	-0.01447	-0.01958	-0.01817	-0.01744	-0.00644735	-0.0014059	-0.00133409	-0.00945575	-0.00442429	-0.00434249	-0.00713147	-0.00210002	-0.00201821
454.403	0.0126142	0.0149429	0.014295	-0.00945106	-0.00530255	-0.0062207	-0.0220652	-0.0179167	-0.0188349	-0.0243939	-0.0202454	-0.0211636	-0.0237461	-0.0195976	-0.0205157	-0.01744	-0.01603	-0.01528	-0.01686	-0.01544	-0.0147	-0.01977	-0.01835	-0.01761	-0.00462524	-0.00188672	-0.00355488	-0.00753393	-0.00480541	-0.00646356	-0.00441855	-0.00169003	-0.00334818
455.367	0.0108102	0.0133462	0.0127499	-0.00896538	-0.00788897	-0.00966175	-0.0197756	-0.0186992	-0.020472	-0.0223116	-0.0212352	-0.023008	-0.0217152	-0.0206388	-0.0224116	-0.01764	-0.01622	-0.01547	-0.0171	-0.01568	-0.01493	-0.01995	-0.01853	-0.01778	-0.00213558	-0.00247917	-0.00500195	-0.00521159	-0.00555518	-0.00807796	-0.00132796	-0.00167155	-0.00419433
456.331	0.00927727	0.0117858	0.011552	-0.0104082	-0.0110318	-0.0110202	-0.0196855	-0.0203091	-0.0202974	-0.022194	-0.0228177	-0.022806	-0.0219602	-0.0225838	-0.0225721	-0.01784	-0.0164	-0.01565	-0.01734	-0.0159	-0.01515	-0.02013	-0.0187	-0.01794	-0.00184546	-0.0039091	-0.00464744	-0.00485402	-0.00691766	-0.007656	-0.000835373	-0.00288901	-0.00363735
457.295	0.00895338	0.011292	0.0116921	-0.0120127	-0.0135177	-0.0112837	-0.0209661	-0.0224711	-0.0202371	-0.0233047	-0.0248097	-0.0225757	-0.0237049	-0.0252098	-0.0229758	-0.01802	-0.01658	-0.01582	-0.01756	-0.01612	-0.01536	-0.0203	-0.01885	-0.0181	-0.00294613	-0.00589108	-0.00441709	-0.00574473	-0.00868968	-0.0072157	-0.00212019	-0.00507514	-0.00359116
458.26	0.0107206	0.0126977	0.0138986	-0.0129478	-0.0141568	-0.0110294	-0.0236684	-0.0248774	-0.02175	-0.0256455	-0.0268545	-0.0237271	-0.0268464	-0.0280554	-0.0249281	-0.0182	-0.01674	-0.01598	-0.01778	-0.01633	-0.01557	-0.02046	-0.01901	-0.01824	-0.00546835	-0.00813737	-0.00576999	-0.00786551	-0.0105245	-0.00815714	-0.00536405	-0.00802306	-0.00566568
459.224	0.0149456	0.0162919	0.0186013	-0.0130849	-0.013405	-0.0102526	-0.0280305	-0.0283507	-0.0251982	-0.0293768	-0.0296969	-0.0265445	-0.0316861	-0.0320063	-0.0288538	-0.01837	-0.0169	-0.01614	-0.018	-0.01653	-0.01576	-0.02062	-0.01915	-0.01838	-0.00966052	-0.0114507	-0.00905821	-0.0113768	-0.0131669	-0.0107845	-0.0105059	-0.0122961	-0.00991362
460.188	0.0224892	0.0228638	0.0267029	-0.011792	-0.0109599	-0.00930714	-0.0342813	-0.0334492	-0.0317964	-0.0346558	-0.0338237	-0.0321709	-0.038495	-0.0376628	-0.03601	-0.01854	-0.01706	-0.01628	-0.0182	-0.01672	-0.01595	-0.02077	-0.01929	-0.01851	-0.0157413	-0.0163892	-0.0155164	-0.0164558	-0.0171037	-0.0162209	-0.0176857	-0.0183336	-0.0174608
461.152	0.0327521	0.0317453	0.0375127	-0.00974851	-0.00790661	-0.00769374	-0.0425006	-0.0406587	-0.0404458	-0.0414938	-0.0396519	-0.039439	-0.0472612	-0.0454194	-0.0452065	-0.01869	-0.0172	-0.01642	-0.0184	-0.01691	-0.01613	-0.0209	-0.01941	-0.01864	-0.0238106	-0.0234587	-0.0240258	-0.0230938	-0.0227419	-0.023309	-0.0265523	-0.0262004	-0.0267575
462.116	0.0462817	0.0432717	0.0517992	-0.00767981	-0.00567379	-0.00492036	-0.0539615	-0.0519555	-0.051202	-0.0509515	-0.0489455	-0.0481921	-0.059479	-0.057473	-0.0567196	-0.01884	-0.01734	-0.01656	-0.01858	-0.01708	-0.0163	-0.02104	-0.01954	-0.01875	-0.0351215	-0.0346155	-0.034642	-0.0323715	-0.0318655	-0.0318921	-0.0379837	-0.0374777	-0.0375143
463.081	0.060498	0.0552223	0.0660874	-0.00481486	-0.00292824	-0.00131887	-0.0653128	-0.0634262	-0.0618168	-0.0600371	-0.0581505	-0.0565411	-0.0709022	-0.0690156	-0.0674063	-0.01898	-0.01747	-0.01668	-0.01876	-0.01725	-0.01647	-0.02116	-0.01965	-0.01886	-0.0463328	-0.0459562	-0.0451368	-0.0412771	-0.0409005	-0.0400711	-0.0483323	-0.0479557	-0.0471363
464.045	0.0738425	0.0662204	0.0775781	-0.000290009	0.00170659	0.00321331	-0.0741325	-0.0721359	-0.0706292	-0.0665104	-0.0645138	-0.063007	-0.0778681	-0.0758715	-0.0743648	-0.01911	-0.01759	-0.0168	-0.01894	-0.01741	-0.01662	-0.02128	-0.01975	-0.01896	-0.0550225	-0.0545459	-0.0538292	-0.0475704	-0.0471038	-0.046387	-0.0543214	-0.0538547	-0.053138
465.009	0.0837979	0.0740686	0.0850121	0.00489143	0.00667189	0.00786487	-0.0789064	-0.077126	-0.075933	-0.0691772	-0.0673967	-0.0662037	-0.0801207	-0.0783402	-0.0771473	-0.01923	-0.0177	-0.01691	-0.0191	-0.01757	-0.01677	-0.02138	-0.01985	-0.01906	-0.0596764	-0.059426	-0.059023	-0.0500772	-0.0498267	-0.0494337	-0.0556155	-0.0553651	-0.0549621
465.973	0.086697	0.0754056	0.0855191	0.0103883	0.010948	0.0119846	-0.0763087	-0.075749	-0.0747124	-0.0650173	-0.0644576	-0.0634211	-0.0751308	-0.0745711	-0.0735345	-0.01935	-0.01781	-0.01701	-0.01926	-0.01771	-0.01692	-0.02149	-0.01994	-0.01915	-0.0569587	-0.057939	-0.0577024	-0.0457573	-0.0467476	-0.0465011	-0.0495262	-0.0505165	-0.0502699
466.938	0.0844298	0.0723468	0.081133	0.0150777	0.014294	0.0151947	-0.0693521	-0.0701358	-0.0692351	-0.0572691	-0.0580528	-0.0571521	-0.0660552	-0.066839	-0.0659382	-0.01946	-0.01791	-0.01711	-0.0194	-0.01785	-0.01705	-0.02158	-0.02003	-0.01922	-0.0498921	-0.0522258	-0.0521251	-0.0378691	-0.0402028	-0.0401021	-0.0397363	-0.04207	-0.0419792
467.902	0.0767551	0.0650709	0.0720067	0.0175161	0.0159705	0.01672	-0.059239	-0.0607847	-0.0600351	-0.0475548	-0.0491005	-0.0483509	-0.0544906	-0.0560363	-0.0552867	-0.01956	-0.018	-0.01719	-0.01954	-0.01798	-0.01718	-0.02166	-0.0201	-0.0193	-0.039679	-0.0427847	-0.0428451	-0.0280148	-0.0311205	-0.0311709	-0.0283713	-0.031477	-0.0315274
468.866	0.0663992	0.0560267	0.0609124	0.0183242	0.0164531	0.0171021	-0.0480749	-0.0499461	-0.0492971	-0.0377024	-0.0395736	-0.0389246	-0.0425881	-0.0444593	-0.0438103	-0.01965	-0.01808	-0.01727	-0.01968	-0.01811	-0.01729	-0.02174	-0.02017	-0.01936	-0.0284249	-0.0318661	-0.0320271	-0.0180224	-0.0214636	-0.0216346	-0.017315	-0.0207561	-0.0209171
469.83	0.0554361	0.047298	0.0502096	0.0173544	0.015782	0.0164073	-0.0380817	-0.0396542	-0.0390289	-0.0299436	-0.031516	-0.0308907	-0.0328552	-0.0344277	-0.0338024	-0.01974	-0.01816	-0.01734	-0.0198	-0.01822	-0.0174	-0.02181	-0.02023	-0.01942	-0.0183417	-0.0214942	-0.0216889	-0.0101436	-0.013296	-0.0134907	-0.00911209	-0.0122645	-0.0124492
470.795	0.0455812	0.0401575	0.0412886	0.015468	0.0145243	0.0152865	-0.0301132	-0.0310568	-0.0302946	-0.0246895	-0.0256331	-0.0248709	-0.0258207	-0.0267643	-0.0260021	-0.01982	-0.01823	-0.01741	-0.01992	-0.01833	-0.01751	-0.02188	-0.02029	-0.01947	-0.0102932	-0.0128268	-0.0128846	-0.0047695	-0.00730314	-0.00736093	-0.00396469	-0.00649833	-0.00655613
471.759	0.0394372	0.036914	0.0367582	0.0133011	0.0131495	0.0142873	-0.0261361	-0.0262877	-0.0251499	-0.023613	-0.0237645	-0.0226267	-0.0234571	-0.0236087	-0.0224709	-0.01989	-0.01829	-0.01746	-0.02003	-0.01843	-0.0176	-0.02193	-0.02033	-0.01951	-0.00624615	-0.00799774	-0.00768989	-0.00358295	-0.00533455	-0.0050267	-0.00360944	-0.00536103	-0.00504318
472.723	0.036415	0.036543	0.0353217	0.0113819	0.0119909	0.0137863	-0.0250331	-0.0244241	-0.0226287	-0.0251611	-0.0245522	-0.0227568	-0.0239397	-0.0233308	-0.0215354	-0.01995	-0.01834	-0.01751	-0.02013	-0.01852	-0.01769	-0.02198	-0.02037	-0.01954	-0.00508307	-0.00608413	-0.00511874	-0.00503111	-0.00603217	-0.00506677	-0.0060469	-0.00704796	-0.00608257
473.687	0.037858	0.0398264	0.0377484	0.0106595	0.0115761	0.0145027	-0.0271985	-0.0262819	-0.0233554	-0.0291669	-0.0282503	-0.0253237	-0.0270889	-0.0261723	-0.0232458	-0.02001	-0.01839	-0.01756	-0.02022	-0.0186	-0.01777	-0.02202	-0.0204	-0.01957	-0.00718849	-0.00789192	-0.00579536	-0.00894686	-0.00965029	-0.00755373	-0.0108289	-0.0115323	-0.00943576
474.651	0.0405711	0.0436537	0.0404495	0.0105081	0.0117924	0.0159563	-0.030063	-0.0287787	-0.0246148	-0.0331456	-0.0318613	-0.0276974	-0.0299414	-0.0286571	-0.0244932	-0.02005	-0.01843	-0.01759	-0.0203	-0.01868	-0.01784	-0.02205	-0.02042	-0.01959	-0.010013	-0.0103487	-0.00702481	-0.0128456	-0.0131813	-0.00985737	-0.0151082	-0.0154538	-0.0121199
475.616	0.0418844	0.0451614	0.0395909	0.0103853	0.0127685	0.0179484	-0.031499	-0.0291159	-0.023936	-0.0347761	-0.0323929	-0.0272131	-0.0292055	-0.0268224	-0.0216425	-0.02009	-0.01846	-0.01762	-0.02038	-0.01875	-0.01791	-0.02208	-0.02044	-0.0196	-0.011409	-0.0106559	-0.006316	-0.0143961	-0.0136429	-0.00930307	-0.0158943	-0.0151512	-0.0108113
476.58	0.041566	0.0443912	0.0366771	0.0109898	0.014308	0.0203545	-0.0305762	-0.0272579	-0.0212115	-0.0334014	-0.0300832	-0.0240367	-0.0256873	-0.022369	-0.0163226	-0.02013	-0.01848	-0.01764	-0.02045	-0.01881	-0.01796	-0.02209	-0.02045	-0.01961	-0.0104462	-0.00877794	-0.00357146	-0.0129514	-0.0112732	-0.00607668	-0.0131488	-0.0114706	-0.00626413
477.544	0.0381321	0.0399563	0.0316637	0.0130649	0.0162807	0.0231589	-0.0250672	-0.0218513	-0.0149732	-0.0268914	-0.0236756	-0.0167975	-0.0185989	-0.015383	-0.00850487	-0.02015	-0.0185	-0.01765	-0.02051	-0.01886	-0.01801	-0.02211	-0.02045	-0.0196	-0.00491719	-0.00335132	0.0026768	-0.00638145	-0.00481558	0.00121254	-0.00493393	-0.00337806	0.00265006
478.508	0.0326691	0.0332779	0.0253635	0.0159338	0.0186172	0.0258373	-0.0167353	-0.014052	-0.00683183	-0.0173441	-0.0146608	-0.00744063	-0.00942968	-0.00674633	0.000473808	-0.02017	-0.01851	-0.01766	-0.02057	-0.01891	-0.01806	-0.02211	-0.02045	-0.0196	0.00343468	0.00445803	0.0108282	0.00322589	0.00424924	0.0106194	0.00615344	0.00717679	0.0135469
479.473	0.0253549	0.0248537	0.0182891	0.0192899	0.0212174	0.0277107	-0.00606507	-0.00413756	0.00235576	-0.00556384	-0.00363633	0.00285698	0.00100082	0.00292832	0.00942164	-0.02018	-0.01851	-0.01765	-0.02061	-0.01895	-0.01809	-0.0221	-0.02043	-0.01958	0.0141149	0.0143724	0.0200058	0.0150462	0.0153137	0.020947	0.0187256	0.0189831	0.0246264
480.437	0.0174321	0.0160677	0.0112962	0.022767	0.0240428	0.0292285	0.00533491	0.00661077	0.0117964	0.00669925	0.0079751	0.0131608	0.0114708	0.0127467	0.0179323	-0.02018	-0.0185	-0.01764	-0.02065	-0.01898	-0.01812	-0.02209	-0.02042	-0.01956	0.0255149	0.0251108	0.0294364	0.0273492	0.0269551	0.0312808	0.0311927	0.0307985	0.0351242
481.401	0.00995754	0.0082831	0.00530397	0.0258682	0.0270529	0.030433	0.0159107	0.0170953	0.0204755	0.0175851	0.0187698	0.0221499	0.0205642	0.0217489	0.025129	-0.02018	-0.01849	-0.01763	-0.02069	-0.019	-0.01814	-0.02208	-0.02039	-0.01953	0.0360907	0.0355853	0.0381055	0.0382751	0.0377698	0.0402899	0.0415168	0.0410114	0.0435316
482.365	0.00366611	0.00206068	0.000635002	0.0286795	0.0301541	0.0318669	0.0250134	0.026488	0.0282008	0.0266189	0.0280935	0.0298062	0.0280445	0.0295191	0.0312319	-0.02016	-0.01847	-0.01761	-0.02071	-0.01902	-0.01815	-0.02205	-0.02036	-0.01949	0.0451734	0.044958	0.0458108	0.0473289	0.0471135	0.0479562	0.049594	0.0493786	0.0502214
483.33	-3.8605e-05	-0.00102238	-0.0017215	0.0308023	0.0333449	0.0342982	0.0308409	0.0333835	0.0343368	0.0318247	0.0343673	0.0353206	0.0325238	0.0350664	0.0360197	-0.02015	-0.01844	-0.01757	-0.02073	-0.01903	-0.01816	-0.02202	-0.02031	-0.01945	0.0509909	0.0518235	0.0519068	0.0525547	0.0533973	0.0534806	0.053771	0.0546035	0.0546969
484.294	-0.00210615	-0.00265173	-0.00284669	0.0331936	0.0363098	0.037093	0.0352998	0.0384159	0.0391992	0.0358454	0.0389615	0.0397447	0.0360403	0.0391565	0.0399397	-0.02012	-0.01841	-0.01754	-0.02074	-0.01903	-0.01816	-0.02198	-0.02027	-0.0194	0.0554198	0.0568259	0.0567392	0.0565854	0.0579915	0.0579047	0.0567683	0.0581744	0.0580877
485.258	-0.00276443	-0.00411987	-0.00365059	0.0369587	0.0384932	0.0396987	0.0397231	0.0412576	0.0424631	0.0410785	0.0426131	0.0438186	0.0406093	0.0421438	0.0433493	-0.02009	-0.01837	-0.01749	-0.02074	-0.01902	-0.01815	-0.02193	-0.02021	-0.01934	0.0598131	0.0596276	0.0599531	0.0618185	0.0616331	0.0619686	0.0611875	0.061002	0.0613375
486.222	-0.00277478	-0.00502921	-0.00365739	0.0412547	0.0406141	0.0426389	0.0440295	0.0433889	0.0454136	0.0462839	0.0456433	0.0476681	0.0449121	0.0442715	0.0462963	-0.02005	-0.01832	-0.01744	-0.02074	-0.01901	-0.01813	-0.02188	-0.02015	-0.01927	0.0640795	0.0617089	0.0628536	0.0670239	0.0646533	0.0657981	0.0657527	0.0633821	0.0645269
487.187	-0.00318056	-0.00544702	-0.00238148	0.0459887	0.0433778	0.0466616	0.0491692	0.0465584	0.0498422	0.0514357	0.0488248	0.0521086	0.0483701	0.0457593	0.0490431	-0.02	-0.01827	-0.01739	-0.02072	-0.01899	-0.01811	-0.02182	-0.02008	-0.0192	0.0691692	0.0648284	0.0672322	0.0721557	0.0678148	0.0702186	0.0704081	0.0660573	0.0684611
488.151	-0.00336356	-0.00527123	-0.000762224	0.0500168	0.0462695	0.0505405	0.0533804	0.0496331	0.0539041	0.055288	0.0515407	0.0558117	0.050779	0.0470317	0.0513027	-0.01995	-0.01821	-0.01732	-0.0207	-0.01896	-0.01808	-0.02175	-0.02001	-0.01913	0.0733304	0.0678431	0.0712241	0.075988	0.0705007	0.0738917	0.0740354	0.0685481	0.0719391
489.115	-0.00313327	-0.00447052	-7.33617e-06	0.0521093	0.0494625	0.0534523	0.0552426	0.0525958	0.0565856	0.0565798	0.053933	0.0579229	0.0521166	0.0494698	0.0534597	-0.01989	-0.01814	-0.01725	-0.02068	-0.01893	-0.01804	-0.02168	-0.01993	-0.01904	0.0751326	0.0707358	0.0738356	0.0772598	0.072863	0.0759629	0.0756101	0.0712133	0.0743131
490.079	-0.00224996	-0.00289986	0.00117377	0.0524312	0.051598	0.0549356	0.0546812	0.0538479	0.0571855	0.0553311	0.0544978	0.0578354	0.0512574	0.0504242	0.0537618	-0.01982	-0.01806	-0.01717	-0.02065	-0.01889	-0.018	-0.0216	-0.01984	-0.01895	0.0745012	0.0719079	0.0743555	0.0759811	0.0733878	0.0758354	0.0748244	0.0722312	0.0746788
491.043	-0.000401754	-0.000367879	0.0035973	0.0506262	0.0513174	0.0542477	0.051028	0.0517191	0.0546494	0.0509941	0.0516853	0.0546156	0.0470289	0.0477201	0.0506504	-0.01974	-0.01798	-0.01709	-0.02061	-0.01884	-0.01795	-0.02151	-0.01975	-0.01885	0.070768	0.0696991	0.0717394	0.0716041	0.0705253	0.0725656	0.070938	0.0698692	0.0718995
492.008	0.00238541	0.00301778	0.00747864	0.0470286	0.0487928	0.0514081	0.0446432	0.0464074	0.0490227	0.0440108	0.0457751	0.0483904	0.0395499	0.0413142	0.0439295	-0.01966	-0.01789	-0.017	-0.02056	-0.01879	-0.01789	-0.02142	-0.01965	-0.01875	0.0643032	0.0642974	0.0660227	0.0645708	0.0645651	0.0662804	0.0642551	0.0642493	0.0659646
492.972	0.00631406	0.00734174	0.0136658	0.0417137	0.0432265	0.0459762	0.0353996	0.0369124	0.0396621	0.0343719	0.0358848	0.0386344	0.0280479	0.0295607	0.0323104	-0.01958	-0.0178	-0.0169	-0.02051	-0.01873	-0.01783	-0.02132	-0.01954	-0.01864	0.0549796	0.0547124	0.0565621	0.0548819	0.0546148	0.0564644	0.0544902	0.054223	0.0560727
493.936	0.0110107	0.0122186	0.021077	0.0351018	0.0361696	0.0385899	0.024091	0.0251589	0.0275791	0.0228832	0.0239511	0.0263713	0.0140247	0.0150926	0.0175128	-0.01948	-0.0177	-0.0168	-0.02045	-0.01866	-0.01776	-0.02121	-0.01943	-0.01852	0.043571	0.0428589	0.0443791	0.0433332	0.0426111	0.0441313	0.0426123	0.0419001	0.0434104
494.9	0.0164279	0.0174375	0.029307	0.0274183	0.0288973	0.0292026	0.0109904	0.0124694	0.0127747	0.00998079	0.0114598	0.0117651	-0.00188869	-0.000409725	-0.000104355	-0.01938	-0.01759	-0.01669	-0.02038	-0.01859	-0.01768	-0.0211	-0.01931	-0.0184	0.0303704	0.0300594	0.0294647	0.0303608	0.0300498	0.0294451	0.0288771	0.028566	0.0279614
495.865	0.0217902	0.0225592	0.0371749	0.0193233	0.0214405	0.0194279	-0.00246696	-0.00034977	-0.00236237	-0.00323587	-0.00111869	-0.00313129	-0.0178517	-0.0157345	-0.0177471	-0.01928	-0.01748	-0.01657	-0.02031	-0.01851	-0.0176	-0.02098	-0.01918	-0.01827	0.016813	0.0171302	0.0142076	0.0170741	0.0173913	0.0144687	0.0151689	0.0154861	0.0125635
496.829	0.0265413	0.0274991	0.0436555	0.0112986	0.0141222	0.0106269	-0.0152427	-0.0124191	-0.0159144	-0.0162005	-0.0133769	-0.0168722	-0.0323569	-0.0295333	-0.0330286	-0.01916	-0.01736	-0.01645	-0.02023	-0.01843	-0.01751	-0.02085	-0.01905	-0.01814	0.00391733	0.00494095	0.000535634	0.00402952	0.00505313	0.000637815	0.00321539	0.004239	-0.000166312
497.793	0.029977	0.0309817	0.0478774	0.00410421	0.00734198	0.00350961	-0.0258728	-0.022635	-0.0264674	-0.0268775	-0.0236398	-0.0274721	-0.0437732	-0.0405355	-0.0443678	-0.01904	-0.01724	-0.01632	-0.02014	-0.01833	-0.01742	-0.02072	-0.01891	-0.018	-0.00683276	-0.00539499	-0.0101474	-0.00673753	-0.00530977	-0.0100521	-0.0062276	-0.00479983	-0.00954221
498.757	0.0310317	0.03132	0.0483188	-0.00102515	0.00163252	-1.43661e-05	-0.0320568	-0.0293992	-0.0310461	-0.0323451	-0.0296875	-0.0313343	-0.049344	-0.0466863	-0.0483332	-0.01892	-0.0171	-0.01619	-0.02005	-0.01823	-0.01732	-0.02058	-0.01877	-0.01785	-0.0131368	-0.0122992	-0.0148561	-0.0122951	-0.0114575	-0.0140143	-0.0113576	-0.0105099	-0.0130768
499.722	0.0302335	0.0296637	0.0459056	-0.00503236	-0.00308338	-0.00218329	-0.0352659	-0.0333169	-0.0324168	-0.0346961	-0.0327471	-0.031847	-0.050938	-0.048989	-0.0480889	-0.01879	-0.01697	-0.01605	-0.01995	-0.01813	-0.01721	-0.02044	-0.01862	-0.0177	-0.0164759	-0.0163469	-0.0163668	-0.0147461	-0.0146171	-0.014637	-0.0136369	-0.0135079	-0.0135278
500.686	0.0275417	0.0263975	0.0406627	-0.00845608	-0.0066001	-0.00474247	-0.0359978	-0.0341418	-0.0322842	-0.0348536	-0.0329976	-0.03114	-0.0491187	-0.0472628	-0.0454051	-0.01865	-0.01682	-0.0159	-0.01984	-0.01802	-0.0171	-0.02029	-0.01847	-0.01754	-0.0173478	-0.0173218	-0.0163842	-0.0150136	-0.0149776	-0.01404	-0.0137251	-0.0136891	-0.0127614
501.65	0.0235974	0.0221308	0.0337711	-0.0112742	-0.00923336	-0.00726117	-0.0348716	-0.0328307	-0.0308585	-0.033405	-0.0313642	-0.029392	-0.0450453	-0.0430044	-0.0410323	-0.01851	-0.01668	-0.01575	-0.01973	-0.0179	-0.01698	-0.02014	-0.01831	-0.01738	-0.0163616	-0.0161507	-0.0151085	-0.013675	-0.0134642	-0.012412	-0.0122681	-0.0120572	-0.011015
502.614	0.018852	0.0174808	0.0261438	-0.0136666	-0.0111429	-0.0100966	-0.0325186	-0.0299949	-0.0289486	-0.0311474	-0.0286237	-0.0275774	-0.0398103	-0.0372866	-0.0362403	-0.01836	-0.01652	-0.01559	-0.01962	-0.01778	-0.01685	-0.01998	-0.01814	-0.01721	-0.0141586	-0.0134749	-0.0133586	-0.0115274	-0.0108437	-0.0107274	-0.0100223	-0.00933865	-0.00922232
503.579	0.0138339	0.0128087	0.0186103	-0.0155662	-0.0125911	-0.0126303	-0.0294001	-0.026425	-0.0264642	-0.0283749	-0.0253997	-0.025439	-0.0341765	-0.0312014	-0.0312406	-0.0182	-0.01636	-0.01543	-0.01949	-0.01765	-0.01672	-0.01981	-0.01797	-0.01704	-0.0112001	-0.010065	-0.0110342	-0.00888486	-0.00774972	-0.00871899	-0.0073658	-0.00623066	-0.00719992
504.543	0.00917497	0.0086756	0.0123372	-0.0168982	-0.0138936	-0.0142865	-0.0260732	-0.0230685	-0.0234615	-0.0255738	-0.0225692	-0.0229621	-0.0292354	-0.0262307	-0.0266237	-0.01804	-0.0162	-0.01526	-0.01936	-0.01752	-0.01658	-0.01964	-0.01779	-0.01686	-0.00803316	-0.00686854	-0.00820152	-0.00621379	-0.00504916	-0.00638215	-0.00487899	-0.00372436	-0.00504735
505.507	0.0050155	0.00509822	0.00722686	-0.0178664	-0.0150502	-0.0152953	-0.0228819	-0.0200657	-0.0203108	-0.0229646	-0.0201485	-0.0203935	-0.0250933	-0.0222771	-0.0225222	-0.01788	-0.01602	-0.01509	-0.01923	-0.01738	-0.01644	-0.01946	-0.01761	-0.01667	-0.00500191	-0.00404573	-0.00522079	-0.00373464	-0.00276845	-0.00395351	-0.00268052	-0.00171434	-0.0028994
506.471	0.00174799	0.00234132	0.00381815	-0.0186215	-0.0161504	-0.015511	-0.0203695	-0.0178984	-0.017259	-0.0209628	-0.0184917	-0.0178523	-0.0224396	-0.0199685	-0.0193292	-0.0177	-0.01585	-0.01491	-0.01909	-0.01723	-0.01629	-0.01928	-0.01742	-0.01648	-0.00266949	-0.00204835	-0.00234902	-0.00187281	-0.00126168	-0.00156235	-0.00111595	-0.000504822	-0.000805486
507.435	-0.000752413	0.000221532	0.00136882	-0.0192483	-0.0172413	-0.0154847	-0.0184959	-0.0164889	-0.0147322	-0.0194698	-0.0174629	-0.0157062	-0.0206171	-0.0186102	-0.0168535	-0.01753	-0.01567	-0.01472	-0.01894	-0.01708	-0.01614	-0.01909	-0.01723	-0.01629	-0.000965905	-0.000818927	-1.22444e-05	-0.000529849	-0.000382871	0.000433811	-4.50117e-05	0.000101966	0.000918649
508.4	-0.0023995	-0.00126736	-0.00071591	-0.0199164	-0.0184527	-0.0158014	-0.0175169	-0.0160532	-0.0134019	-0.018649	-0.0171854	-0.0145341	-0.0192004	-0.0177368	-0.0150855	-0.01734	-0.01548	-0.01454	-0.01879	-0.01692	-0.01598	-0.01889	-0.01703	-0.01608	-0.000176856	-0.000573247	0.00113805	0.00014101	-0.00026538	0.00144592	0.000526613	0.000130223	0.00183152
509.364	-0.00343404	-0.00239204	-0.00233956	-0.0205225	-0.0196273	-0.0162128	-0.0170884	-0.0161932	-0.0127788	-0.0181304	-0.0172352	-0.0138208	-0.0181829	-0.0172877	-0.0138733	-0.01716	-0.01529	-0.01434	-0.01863	-0.01676	-0.01582	-0.0187	-0.01682	-0.01588	7.1576e-05	-0.000903239	0.00156122	0.000499571	-0.000475245	0.00199922	0.000731318	-0.000253497	0.00222097
510.328	-0.00400046	-0.00347877	-0.00363363	-0.0209902	-0.0207474	-0.0165439	-0.0169898	-0.0167469	-0.0125434	-0.0175115	-0.0172686	-0.0130651	-0.0173566	-0.0171137	-0.0129102	-0.01696	-0.01509	-0.01414	-0.01847	-0.01659	-0.01565	-0.01849	-0.01662	-0.01567	-2.97727e-05	-0.00165689	0.0015966	0.000958538	-0.000678582	0.00258491	0.000594169	-0.00103295	0.00222054
511.292	-0.00430162	-0.00435492	-0.00450898	-0.0214089	-0.0215235	-0.0171589	-0.0171073	-0.0172218	-0.0128573	-0.017054	-0.0171685	-0.0128039	-0.0168999	-0.0170145	-0.0126499	-0.01677	-0.01489	-0.01394	-0.0183	-0.01642	-0.01547	-0.01828	-0.0164	-0.01545	-0.000337271	-0.00233184	0.00108275	0.00124603	-0.000748533	0.00266605	0.000301527	-0.00169304	0.00172155
512.257	-0.00460889	-0.00497353	-0.00485193	-0.0220065	-0.0215364	-0.0186642	-0.0173977	-0.0169275	-0.0140553	-0.017033	-0.0165629	-0.0136907	-0.0171546	-0.0166845	-0.0138123	-0.01656	-0.01468	-0.01373	-0.01813	-0.01624	-0.01529	-0.01807	-0.01618	-0.01523	-0.000837655	-0.00224751	-0.000325327	0.00109698	-0.000322876	0.00159931	-0.000113975	-0.00153383	0.000388353
513.221	-0.00486121	-0.00528383	-0.00486756	-0.0222902	-0.0211577	-0.0201589	-0.017429	-0.0162965	-0.0152977	-0.0170063	-0.0158738	-0.0148751	-0.0174226	-0.0162901	-0.0152913	-0.01636	-0.01447	-0.01351	-0.01795	-0.01606	-0.01511	-0.01785	-0.01596	-0.01501	-0.00106897	-0.00182646	-0.00178768	0.000943652	0.000186162	0.000234943	-0.000206089	-0.00096358	-0.000914798
514.185	-0.00511452	-0.00515712	-0.00465407	-0.0218396	-0.0204983	-0.0211133	-0.0167251	-0.0153838	-0.0159988	-0.0166825	-0.0153412	-0.0159562	-0.0171855	-0.0158442	-0.0164593	-0.01614	-0.01425	-0.01329	-0.01777	-0.01587	-0.01492	-0.01763	-0.01573	-0.01478	-0.000585089	-0.0011338	-0.00270882	0.00108751	0.000528802	-0.00103622	0.000560534	1.82592e-06	-0.0015632
515.149	-0.00528916	-0.00478031	-0.00441857	-0.0206644	-0.0199203	-0.0210196	-0.0153752	-0.0146312	-0.0157304	-0.0158841	-0.01514	-0.0162392	-0.0162458	-0.0155018	-0.016601	-0.01593	-0.01403	-0.01307	-0.01758	-0.01568	-0.01472	-0.0174	-0.0155	-0.01454	0.000554786	-0.000601167	-0.00266039	0.00169594	0.000539986	-0.00151924	0.00200128	0.000845329	-0.0012139
516.114	-0.00523019	-0.00407805	-0.0044755	-0.017908	-0.0200351	-0.018409	-0.0126778	-0.0148049	-0.0131788	-0.0138299	-0.0159571	-0.0143309	-0.0134325	-0.0155596	-0.0139335	-0.0157	-0.0138	-0.01284	-0.01739	-0.01549	-0.01452	-0.01717	-0.01527	-0.0143	0.00302219	-0.00100495	-0.000338766	0.00356006	-0.000467084	0.000189098	0.00487663	0.000849489	0.00150567
517.078	-0.00521941	-0.00370852	-0.00460112	-0.0157484	-0.0202054	-0.0156338	-0.010529	-0.014986	-0.0104144	-0.0120399	-0.0164969	-0.0119252	-0.0111473	-0.0156043	-0.0110326	-0.01548	-0.01357	-0.01261	-0.01719	-0.01528	-0.01432	-0.01693	-0.01503	-0.01406	0.00495101	-0.00141597	0.00219564	0.00515012	-0.00121686	0.00239475	0.00692664	0.000569657	0.00417127
518.042	-0.00564164	-0.00473095	-0.0046725	-0.0172693	-0.0202002	-0.0151698	-0.0116276	-0.0145586	-0.00952818	-0.0125383	-0.0154693	-0.0104389	-0.0125968	-0.0155277	-0.0104973	-0.01525	-0.01334	-0.01237	-0.01699	-0.01508	-0.01411	-0.01669	-0.01478	-0.01381	0.00362237	-0.00121859	0.00284182	0.00445169	-0.000389266	0.00367114	0.00487333	3.23754e-05	0.00409278
519.006	-0.00603288	-0.00586679	-0.0047016	-0.0188968	-0.0194115	-0.0151777	-0.0128639	-0.0133786	-0.00914479	-0.01303	-0.0135447	-0.00931089	-0.0141952	-0.0147099	-0.0104761	-0.01501	-0.0131	-0.01213	-0.01678	-0.01487	-0.0139	-0.01644	-0.01453	-0.01356	0.0021461	-0.000278591	0.00298521	0.00375	0.00132531	0.00458911	0.00257138	0.000146685	0.00341049
519.971	-0.0059696	-0.00595213	-0.0046599	-0.0171665	-0.0165887	-0.014547	-0.0111969	-0.0106191	-0.0085774	-0.0112144	-0.0106366	-0.00859488	-0.0125066	-0.0119288	-0.00988711	-0.01477	-0.01286	-0.01189	-0.01657	-0.01465	-0.01368	-0.01619	-0.01428	-0.01331	0.00357311	0.00224088	0.0033126	0.00535563	0.0040134	0.00508512	0.00371398	0.00238175	0.00345347
520.935	-0.00571532	-0.00570213	-0.00454587	-0.014834	-0.0134278	-0.0135664	-0.00911873	-0.00771245	-0.00785104	-0.00913192	-0.00772564	-0.00786422	-0.0102882	-0.0088819	-0.00902048	-0.01453	-0.01261	-0.01164	-0.01635	-0.01443	-0.01346	-0.01594	-0.01402	-0.01305	0.00541127	0.00489755	0.00378896	0.00721808	0.00670436	0.00559578	0.00555754	0.00504382	0.00393523
521.899	-0.00534693	-0.00545724	-0.00428842	-0.0139303	-0.0114747	-0.0121448	-0.00858333	-0.00612775	-0.00679783	-0.00847303	-0.00601744	-0.00668753	-0.00964184	-0.00718626	-0.00785635	-0.01428	-0.01236	-0.01139	-0.01613	-0.01421	-0.01324	-0.01568	-0.01376	-0.01279	0.00569667	0.00623225	0.00459217	0.00765697	0.00819256	0.00655247	0.0061582	0.00669379	0.0050537
522.863	-0.00500075	-0.00517769	-0.00406775	-0.0131652	-0.00992814	-0.0103105	-0.00816449	-0.0049274	-0.00530976	-0.00798755	-0.00475046	-0.00513282	-0.00909749	-0.00586039	-0.00624275	-0.01403	-0.0121	-0.01113	-0.01591	-0.01398	-0.01301	-0.01542	-0.01349	-0.01252	0.00586551	0.0071726	0.00582024	0.00792245	0.00922954	0.00787718	0.00677989	0.00808699	0.00673462
523.827	-0.00484797	-0.00496538	-0.00408264	-0.012065	-0.00868525	-0.00794556	-0.00721701	-0.00383728	-0.00309759	-0.00709959	-0.00371986	-0.00298018	-0.00798234	-0.00460261	-0.00386292	-0.01377	-0.01185	-0.01087	-0.01568	-0.01375	-0.01277	-0.01515	-0.01322	-0.01225	0.00655299	0.00801272	0.00777241	0.00858041	0.0100301	0.00978982	0.00793083	0.00938056	0.00915025
524.792	-0.00486083	-0.00473577	-0.0042063	-0.0102126	-0.0071969	-0.00539784	-0.00535179	-0.00233608	-0.000537013	-0.00547685	-0.00246113	-0.000662065	-0.00600632	-0.00299061	-0.00119154	-0.01351	-0.01158	-0.0106	-0.01545	-0.01351	-0.01254	-0.01488	-0.01295	-0.01197	0.00815821	0.00924392	0.010063	0.00997315	0.0110489	0.0118779	0.00989422	0.0109799	0.011799
525.756	-0.0051271	-0.00444108	-0.00445834	-0.00680719	-0.00482104	-0.00291368	-0.00168009	0.000306061	0.00221341	-0.00236611	-0.000379951	0.0015274	-0.00234885	-0.000362695	0.00154466	-0.01325	-0.01132	-0.01034	-0.01521	-0.01327	-0.01229	-0.01461	-0.01268	-0.0117	0.0115699	0.0116261	0.0125534	0.0128439	0.01289	0.0138174	0.0133944	0.0134506	0.0143779
526.72	-0.00547139	-0.00407291	-0.0045984	-0.00252704	-0.00173372	-0.000679747	0.00294434	0.00373767	0.00479164	0.00154587	0.00233919	0.00339316	0.00207136	0.00286468	0.00391865	-0.01298	-0.01105	-0.01007	-0.01497	-0.01303	-0.01205	-0.01433	-0.0124	-0.01142	0.0159243	0.0147877	0.0148616	0.0165159	0.0153692	0.0154432	0.0175862	0.0164495	0.0165235
527.684	-0.00580433	-0.00343747	-0.00421211	0.00271889	0.00275049	0.000437148	0.00852322	0.00855482	0.00624148	0.00615636	0.00618796	0.00387462	0.006931	0.0069626	0.00464926	-0.01271	-0.01077	-0.00979	-0.01472	-0.01278	-0.0118	-0.01405	-0.01211	-0.01113	0.0212332	0.0193248	0.0160315	0.0208764	0.018968	0.0156746	0.0223402	0.0204318	0.0171384
528.649	-0.0059556	-0.00304312	-0.0038411	0.00742334	0.00668913	0.00223118	0.0133789	0.0126447	0.00818678	0.0104665	0.00973225	0.0052743	0.0112644	0.0105302	0.00607228	-0.01244	-0.0105	-0.00951	-0.01448	-0.01253	-0.01155	-0.01377	-0.01183	-0.01084	0.0258189	0.0231447	0.0176968	0.0249465	0.0222622	0.0168243	0.0262931	0.0236189	0.0181709
529.613	-0.00572835	-0.00381727	-0.00428802	0.00946652	0.00748109	0.00721822	0.0151949	0.0132094	0.0129466	0.0132838	0.0112984	0.0110355	0.0137545	0.0117691	0.0115062	-0.01216	-0.01022	-0.00923	-0.01422	-0.01228	-0.01129	-0.01348	-0.01154	-0.01055	0.0273549	0.0234294	0.0221766	0.0275038	0.0235784	0.0223255	0.0274271	0.0235016	0.0222488
530.577	-0.00511277	-0.00430893	-0.00435541	0.0107771	0.00778775	0.0123664	0.0158899	0.0129005	0.0174791	0.015086	0.0120967	0.0166753	0.0151325	0.0121432	0.0167218	-0.01188	-0.00994	-0.00895	-0.01397	-0.01202	-0.01103	-0.01319	-0.01125	-0.01026	0.0277699	0.0228405	0.0264291	0.029056	0.0241167	0.0277053	0.0275467	0.0226174	0.026206
531.541	-0.0039638	-0.00306747	-0.00283803	0.0130284	0.00990661	0.0149828	0.0169922	0.0138704	0.0189466	0.0160959	0.0129741	0.0180503	0.0158665	0.0127446	0.0178208	-0.0116	-0.00965	-0.00866	-0.01371	-0.01176	-0.01077	-0.0129	-0.01095	-0.00996	0.0285922	0.0235204	0.0276066	0.0298059	0.0247341	0.0288203	0.0281692	0.0230973	0.0271835
532.505	-0.00249042	-0.00101921	-0.000561801	0.0148665	0.0123283	0.0165662	0.0173569	0.0148187	0.0190566	0.0158857	0.0133475	0.0175854	0.0154283	0.0128901	0.017128	-0.01131	-0.00936	-0.00837	-0.01345	-0.0115	-0.01051	-0.0126	-0.01065	-0.00966	0.0286669	0.0241787	0.0274266	0.0293357	0.0248475	0.0280954	0.0281089	0.0236206	0.0268686
533.47	-0.000883445	0.00144587	0.00198872	0.0153597	0.0144562	0.0178287	0.0162432	0.0153396	0.0187122	0.0139138	0.0130103	0.0163828	0.013371	0.0124675	0.01584	-0.01102	-0.00907	-0.00808	-0.01318	-0.01123	-0.01024	-0.0123	-0.01035	-0.00936	0.0272632	0.0244096	0.0267922	0.0270938	0.0242403	0.0266228	0.0266472	0.0237936	0.0261761
534.434	0.00094761	0.00416937	0.00499472	0.0149135	0.0158491	0.018437	0.0139659	0.0149015	0.0174894	0.0107441	0.0116798	0.0142676	0.00991877	0.0108544	0.0134423	-0.01073	-0.00877	-0.00778	-0.01292	-0.01096	-0.00997	-0.012	-0.01005	-0.00905	0.0246959	0.0236715	0.0252694	0.0236641	0.0226398	0.0242376	0.0239607	0.0229463	0.0245342
535.398	0.00302093	0.0068545	0.00849561	0.0134379	0.0157419	0.0183805	0.0104169	0.012721	0.0153595	0.00658336	0.00888741	0.011526	0.00494225	0.00724631	0.00988487	-0.01043	-0.00848	-0.00748	-0.01264	-0.01069	-0.00969	-0.0117	-0.00974	-0.00874	0.0208469	0.021201	0.0228395	0.0192234	0.0195774	0.021216	0.0197854	0.0201295	0.0217681
536.362	0.00536258	0.00952634	0.0124322	0.011487	0.0145098	0.0174027	0.00612444	0.00914722	0.0120401	0.00196069	0.00498346	0.00787637	-0.000945145	0.00207763	0.00497053	-0.01013	-0.00818	-0.00718	-0.01237	-0.01041	-0.00942	-0.01139	-0.00943	-0.00843	0.0162544	0.0173272	0.0192201	0.0143307	0.0153935	0.0172964	0.0147045	0.0157672	0.0176601
537.327	0.00806374	0.0120872	0.0169388	0.00950511	0.0119037	0.0151408	0.00144137	0.00383992	0.00707706	-0.00258213	-0.00018357	0.00305356	-0.00743373	-0.00503517	-0.00179804	-0.00983	-0.00788	-0.00688	-0.01209	-0.01014	-0.00914	-0.01108	-0.00912	-0.00812	0.0112714	0.0117199	0.0139571	0.00950787	0.00995643	0.0121936	0.00899318	0.00943173	0.0116689
538.291	0.0109474	0.0146085	0.0214741	0.00773244	0.00903176	0.0119036	-0.00321492	-0.0019156	0.000956224	-0.00687606	-0.00557674	-0.00270492	-0.0137417	-0.0124424	-0.00957053	-0.00953	-0.00757	-0.00657	-0.01181	-0.00985	-0.00885	-0.01077	-0.00881	-0.00781	0.00631508	0.0056544	0.00752622	0.00493394	0.00427326	0.00614508	0.00337006	0.00270938	0.0045812
539.255	0.0140783	0.0173278	0.0257952	0.00690487	0.0069059	0.00726855	-0.00717341	-0.00717239	-0.00680974	-0.0104229	-0.0104219	-0.0100593	-0.0188904	-0.0188893	-0.0185267	-0.00922	-0.00726	-0.00626	-0.01153	-0.00957	-0.00857	-0.01045	-0.00849	-0.00749	0.00204659	8.76139e-05	-0.000549735	0.00110706	-0.000851918	-0.00148927	-0.00125089	-0.00320986	-0.00384721
540.219	0.016822	0.0196484	0.0291405	0.00597998	0.00556636	0.00306683	-0.010842	-0.0112556	-0.0137552	-0.0136684	-0.0140821	-0.0165816	-0.0231605	-0.0235741	-0.0260737	-0.00892	-0.00695	-0.00595	-0.01125	-0.00929	-0.00828	-0.01013	-0.00817	-0.00717	-0.00192203	-0.00430565	-0.00780518	-0.00241843	-0.00479205	-0.00830159	-0.00521096	-0.00758458	-0.0110841
541.184	0.0186378	0.0211726	0.0306508	0.00375187	0.00565079	0.00119672	-0.0148859	-0.012987	-0.0174411	-0.0174207	-0.0155218	-0.0199759	-0.0268989	-0.025	-0.029454	-0.00861	-0.00664	-0.00564	-0.01096	-0.009	-0.00799	-0.00981	-0.00785	-0.00685	-0.00627593	-0.006347	-0.0118011	-0.0064607	-0.00652178	-0.0119859	-0.00891969	-0.00898076	-0.0144348
542.148	0.0193091	0.0215408	0.0303751	0.00144674	0.00637891	0.0010342	-0.0178623	-0.0129302	-0.0182749	-0.0200941	-0.0151619	-0.0205066	-0.0289284	-0.0239962	-0.0293409	-0.00829	-0.00633	-0.00532	-0.01067	-0.00871	-0.0077	-0.00949	-0.00753	-0.00652	-0.00957234	-0.00660017	-0.0129549	-0.0094241	-0.00645193	-0.0128066	-0.0112784	-0.00830623	-0.0146609
543.112	0.0182441	0.020061	0.0278295	-0.000251636	0.00720276	0.00313675	-0.0184957	-0.0110413	-0.0151073	-0.0203126	-0.0128582	-0.0169242	-0.0280811	-0.0206267	-0.0246927	-0.00798	-0.00601	-0.00501	-0.01038	-0.00841	-0.00741	-0.00917	-0.00721	-0.0062	-0.0105157	-0.00503133	-0.0100973	-0.00993261	-0.00444821	-0.00951422	-0.0112518	-0.00575743	-0.0108334
544.076	0.0160277	0.0173336	0.0237542	-0.000921832	0.008063	0.00585813	-0.0169496	-0.00796475	-0.0101696	-0.0182554	-0.00927062	-0.0114755	-0.024676	-0.0156912	-0.017896	-0.00766	-0.0057	-0.00469	-0.01008	-0.00812	-0.00711	-0.00884	-0.00688	-0.00587	-0.00928958	-0.00226475	-0.00547961	-0.00817545	-0.00115062	-0.00436548	-0.00906917	-0.00204435	-0.00525921
545.04	0.0128829	0.0135139	0.0184845	0.000412789	0.00864075	0.00761528	-0.0124701	-0.00424212	-0.00526759	-0.0131011	-0.00487318	-0.00589865	-0.0180717	-0.00984373	-0.0108692	-0.00734	-0.00538	-0.00437	-0.00979	-0.00782	-0.00681	-0.00852	-0.00655	-0.00554	-0.00513009	0.00113788	-0.000897592	-0.00331115	0.00294682	0.000911348	-0.0040914	0.00216656	0.000131092
546.005	0.00930402	0.00924612	0.0127518	0.00277041	0.00916659	0.00877616	-0.00653361	-0.000137434	-0.000527867	-0.00647571	-7.95316e-05	-0.000469965	-0.00998136	-0.00358518	-0.00397561	-0.00702	-0.00506	-0.00405	-0.00949	-0.00752	-0.00651	-0.00819	-0.00622	-0.00521	0.000486386	0.00492257	0.00352213	0.00301429	0.00744047	0.00604004	0.00218213	0.00660831	0.00520788
546.969	0.00578307	0.00509333	0.00727015	0.00566054	0.00966248	0.00882018	-0.000122522	0.00387942	0.00303711	0.00056721	0.00456915	0.00372685	-0.00160961	0.00239233	0.00155003	-0.0067	-0.00474	-0.00372	-0.00919	-0.00722	-0.00621	-0.00786	-0.00589	-0.00488	0.00657748	0.00861942	0.00675711	0.00975721	0.0117892	0.00993685	0.00873745	0.0107694	0.00891708
547.933	0.00255072	0.00145385	0.00242652	0.00858585	0.0104353	0.0088299	0.00603513	0.00788458	0.00627918	0.007132	0.00898145	0.00737605	0.00615933	0.00800877	0.00640337	-0.00638	-0.00441	-0.0034	-0.00889	-0.00692	-0.00591	-0.00753	-0.00556	-0.00455	0.0124151	0.0122946	0.00967918	0.016022	0.0159014	0.013286	0.0148275	0.0147069	0.0120916
548.898	6.75259e-05	-0.0010331	-0.00106855	0.0105647	0.0117704	0.00944236	0.0104972	0.0117029	0.00937484	0.0115978	0.0128035	0.0104755	0.0116333	0.0128389	0.0105109	-0.00605	-0.00409	-0.00307	-0.00858	-0.00662	-0.0056	-0.00719	-0.00522	-0.00421	0.0165472	0.0157929	0.0124448	0.0201778	0.0194235	0.0160755	0.0189874	0.0182231	0.014885
549.862	-0.00186413	-0.0025272	-0.00347194	0.0125595	0.0137542	0.0114735	0.0144236	0.0156184	0.0133376	0.0150867	0.0162814	0.0140007	0.0160314	0.0172262	0.0149454	-0.00573	-0.00376	-0.00275	-0.00828	-0.00631	-0.0053	-0.00686	-0.00489	-0.00387	0.0201536	0.0193784	0.0160876	0.0233667	0.0225914	0.0193007	0.0223367	0.0215615	0.0182607
550.826	-0.00331332	-0.00265021	-0.00458309	0.0158285	0.017168	0.0173061	0.0191419	0.0204813	0.0206194	0.0184788	0.0198182	0.0199563	0.0204116	0.0217511	0.0218892	-0.0054	-0.00343	-0.00242	-0.00797	-0.006	-0.00499	-0.00652	-0.00455	-0.00354	0.0245419	0.0239113	0.0230394	0.0264488	0.0258182	0.0249463	0.0259642	0.0253336	0.0244617
551.79	-0.00420516	-0.0023767	-0.00506382	0.0185016	0.0202131	0.0228765	0.0227068	0.0244183	0.0270817	0.0208783	0.0225898	0.0252532	0.0235654	0.025277	0.0279404	-0.00507	-0.0031	-0.00209	-0.00766	-0.0057	-0.00468	-0.00618	-0.00422	-0.0032	0.0277768	0.0275183	0.0291717	0.0285383	0.0282898	0.0299332	0.0283971	0.0281486	0.029792
552.754	-0.00430089	-0.00278001	-0.00562613	0.0186957	0.0208656	0.0241636	0.0229966	0.0251665	0.0284645	0.0214757	0.0236456	0.0269436	0.0243219	0.0264917	0.0297897	-0.00474	-0.00277	-0.00176	-0.00735	-0.00539	-0.00437	-0.00584	-0.00388	-0.00286	0.0277366	0.0279365	0.0302245	0.0288257	0.0290356	0.0313136	0.0280189	0.0282287	0.0305067
553.719	-0.00416123	-0.0031856	-0.00591893	0.0177075	0.020583	0.0234225	0.0218687	0.0247443	0.0275837	0.0208931	0.0237686	0.0266081	0.0236264	0.026502	0.0293414	-0.00441	-0.00244	-0.00142	-0.00704	-0.00508	-0.00406	-0.0055	-0.00354	-0.00252	0.0262787	0.0271843	0.0290037	0.0279331	0.0288486	0.0306681	0.02634	0.0272555	0.029075
554.683	-0.00444659	-0.00323347	-0.0058103	0.0164395	0.0204705	0.0216158	0.0208861	0.0249171	0.0260624	0.019673	0.023704	0.0248493	0.0222498	0.0262808	0.0274261	-0.00408	-0.00211	-0.00109	-0.00673	-0.00476	-0.00374	-0.00516	-0.0032	-0.00218	0.0249661	0.0270271	0.0271524	0.026403	0.028464	0.0285893	0.0246254	0.0266963	0.0268216
555.647	-0.0046192	-0.00305335	-0.00535474	0.0141907	0.0195615	0.0186008	0.0188099	0.0241807	0.02322	0.0172441	0.0226149	0.0216542	0.0195455	0.0249163	0.0239556	-0.00374	-0.00178	-0.000759164	-0.00642	-0.00445	-0.00343	-0.00482	-0.00286	-0.00184	0.0225499	0.0259607	0.0239792	0.0236641	0.0270649	0.0250842	0.0219948	0.0254057	0.023425
556.611	-0.00423088	-0.00257532	-0.00441919	0.0102485	0.0171723	0.014395	0.0144794	0.0214032	0.0186258	0.0128239	0.0197476	0.0169703	0.0146677	0.0215915	0.0188142	-0.00341	-0.00145	-0.000425177	-0.0061	-0.00414	-0.00312	-0.00448	-0.00252	-0.00149	0.0178894	0.0228532	0.019051	0.0189239	0.0238876	0.0200903	0.0176905	0.0226543	0.0188469
557.576	-0.00367327	-0.00203827	-0.00343446	0.00554968	0.01356	0.00948068	0.00922295	0.0172332	0.0131539	0.00758796	0.0155983	0.0115189	0.00898415	0.0169944	0.0129151	-0.00308	-0.00111	-9.06438e-05	-0.00579	-0.00382	-0.0028	-0.00414	-0.00217	-0.00115	0.012303	0.0183432	0.0132446	0.013378	0.0194183	0.0143189	0.0126104	0.0186507	0.0135514
558.54	-0.00309278	-0.00163947	-0.00272939	0.000550394	0.00842647	0.00415235	0.00364317	0.0115192	0.00724513	0.00218987	0.0100659	0.00579182	0.00327978	0.0111559	0.00688174	-0.00274	-0.000777944	0.000244383	-0.00547	-0.00351	-0.00248	-0.00379	-0.00183	-0.000808662	0.00638317	0.0122972	0.00700074	0.00765987	0.0135759	0.00827182	0.0071138	0.0130299	0.00773442
559.504	-0.00277692	-0.00143395	-0.00247683	-0.00402049	0.00275365	-0.00100824	-0.00124357	0.00553058	0.00176869	-0.00258654	0.0041876	0.000425712	-0.00154367	0.00523048	0.00146859	-0.00241	-0.000443195	0.000579852	-0.00515	-0.00319	-0.00217	-0.00345	-0.00149	-0.000464916	0.00116643	0.00597377	0.00118883	0.00256346	0.0073776	0.00259571	0.00204922	0.00686337	0.00207639
560.468	-0.00331448	-0.00168906	-0.00320114	-0.00689301	-0.00298999	-0.00540662	-0.00357853	0.00032449	-0.00209215	-0.00520395	-0.00130093	-0.00371756	-0.00369187	0.000211156	-0.00220548	-0.00207	-0.000108128	0.00091561	-0.00484	-0.00287	-0.00185	-0.00311	-0.00114	-0.000120915	-0.00150853	0.000432618	-0.00300776	-0.000363949	0.00156907	-0.00186756	-0.00133438	0.000598645	-0.00283708
561.433	-0.00394803	-0.00196504	-0.00417661	-0.00923428	-0.00756233	-0.00878643	-0.00528626	-0.0036143	-0.00483841	-0.00726924	-0.00559728	-0.00682139	-0.00505768	-0.00338572	-0.00460983	-0.00173	0.000227207	0.00125	-0.00452	-0.00256	-0.00153	-0.00276	-0.000801107	0.000223292	-0.00355626	-0.00384151	-0.00608841	-0.00274924	-0.00303728	-0.00529139	-0.00396909	-0.00425603	-0.00650453
562.397	-0.00390675	-0.0015749	-0.00475863	-0.0122361	-0.00872002	-0.0104036	-0.00832936	-0.00481327	-0.00649682	-0.0106612	-0.00714512	-0.00882867	-0.00747748	-0.00396139	-0.00564494	-0.0014	0.00056276	0.00159	-0.0042	-0.00224	-0.00121	-0.00242	-0.000457373	0.000567657	-0.00692936	-0.00537603	-0.00808682	-0.00646122	-0.00490512	-0.00761867	-0.00663834	-0.00508487	-0.00779345
563.361	-0.00381962	-0.00152767	-0.00522813	-0.0145545	-0.00899823	-0.0111267	-0.0107349	-0.0051786	-0.0073071	-0.0130269	-0.00747056	-0.00959905	-0.00932639	-0.0037701	-0.00589859	-0.00106	0.000898378	0.00192	-0.00388	-0.00192	-0.000896378	-0.00207	-0.000113605	0.000912027	-0.0096749	-0.00607698	-0.0092271	-0.00914685	-0.00555056	-0.00870268	-0.00845917	-0.00485927	-0.0080134
564.325	-0.00416174	-0.00309308	-0.0057191	-0.0148019	-0.0105587	-0.0114	-0.0106402	-0.00639698	-0.0072383	-0.0117088	-0.00746564	-0.00830696	-0.00908283	-0.00483962	-0.00568094	-0.000722225	0.00123	0.00226	-0.00356	-0.0016	-0.000577696	-0.00173	0.00023015	0.00126	-0.00991796	-0.00762698	-0.0094983	-0.00814885	-0.00586564	-0.00772927	-0.00830073	-0.00601767	-0.00788884
565.289	-0.0046239	-0.0048021	-0.00602772	-0.014301	-0.0122783	-0.011753	-0.0096771	-0.00765445	-0.00712913	-0.0094989	-0.00747625	-0.00695093	-0.00827328	-0.00625063	-0.0057253	-0.000385137	0.00157	0.0026	-0.00324	-0.00129	-0.000258847	-0.00138	0.000573846	0.0016	-0.00929196	-0.00922445	-0.00972913	-0.0062589	-0.00618625	-0.00669208	-0.00761015	-0.00754135	-0.00804218
566.254	-0.00509466	-0.00539297	-0.00586682	-0.0139855	-0.0138183	-0.0131729	-0.00889083	-0.00872361	-0.00807824	-0.00859252	-0.0084253	-0.00777992	-0.00811868	-0.00795146	-0.00730608	-4.81404e-05	0.00191	0.00293	-0.00292	-0.000967239	6.00235e-05	-0.00104	0.000917331	0.00194	-0.00884269	-0.0106336	-0.0110082	-0.00567252	-0.00745806	-0.00783995	-0.00761281	-0.00940292	-0.00978022
567.218	-0.00545588	-0.00551357	-0.00562044	-0.0136345	-0.0149874	-0.0147307	-0.00817864	-0.00953153	-0.00927478	-0.00812095	-0.00947384	-0.00921709	-0.00801408	-0.00936697	-0.00911022	0.000288718	0.00224	0.00327	-0.0026	-0.000648881	0.000378865	-0.000690952	0.00126	0.00229	-0.00846736	-0.0117715	-0.0125448	-0.00552095	-0.00882496	-0.00959595	-0.00776221	-0.011066	-0.0118393
568.182	-0.00550984	-0.00534168	-0.00561577	-0.0132651	-0.0153698	-0.0158671	-0.00775522	-0.00985996	-0.0103572	-0.00792339	-0.0100281	-0.0105254	-0.00764929	-0.00975403	-0.0102513	0.000625391	0.00258	0.0036	-0.00228	-0.00033057	0.000697631	-0.000346268	0.0016	0.00263	-0.00838061	-0.01244	-0.0139572	-0.00564339	-0.00969756	-0.011223	-0.00780796	-0.011859	-0.0133862
569.146	-0.00538381	-0.00502579	-0.00573629	-0.0130973	-0.0153014	-0.0164601	-0.00771345	-0.00991754	-0.0110763	-0.00807147	-0.0102756	-0.0114343	-0.00736097	-0.00956506	-0.0107238	0.000961729	0.00291	0.00394	-0.00196	-1.24511e-05	0.00102	-1.94609e-06	0.00195	0.00297	-0.00867518	-0.0128275	-0.0150163	-0.00611147	-0.0102631	-0.0124543	-0.00801365	-0.0121697	-0.0143484
570.111	-0.00508082	-0.00479913	-0.00605913	-0.0133276	-0.0148498	-0.0160697	-0.00824682	-0.00976894	-0.0109889	-0.00852851	-0.0100506	-0.0112706	-0.00726851	-0.00879064	-0.0100106	0.0013	0.00324	0.00427	-0.00164	0.000305429	0.00133	0.00034197	0.00229	0.00332	-0.00954682	-0.0130089	-0.0152589	-0.00688851	-0.0103561	-0.0126006	-0.00847494	-0.0119451	-0.014195
571.075	-0.00477586	-0.00458537	-0.00633055	-0.0140441	-0.0144037	-0.0150908	-0.0092682	-0.00962781	-0.0103149	-0.00945869	-0.00981831	-0.0105054	-0.00771351	-0.00807312	-0.00876025	0.00163	0.00358	0.00461	-0.00132	0.000623023	0.00165	0.000685436	0.00263	0.00366	-0.0108982	-0.0132078	-0.0149249	-0.00813869	-0.0104413	-0.0121554	-0.00944638	-0.0117506	-0.0134677
572.039	-0.00467777	-0.00435879	-0.00626503	-0.0156839	-0.0144901	-0.0136285	-0.0110061	-0.00981231	-0.00895075	-0.0113251	-0.0101313	-0.00926973	-0.00941889	-0.00822505	-0.0073635	0.00197	0.00391	0.00494	-0.001	0.000940188	0.00197	0.00103	0.00297	0.004	-0.0129761	-0.0137223	-0.0138908	-0.0103251	-0.0110715	-0.0112397	-0.0115374	-0.0122835	-0.012452
573.003	-0.00468808	-0.00420087	-0.00603518	-0.0173952	-0.0147617	-0.0121122	-0.0127071	-0.0100736	-0.00742408	-0.0131943	-0.0105608	-0.00791129	-0.01136	-0.0087265	-0.00607698	0.0023	0.00424	0.00527	-0.000682765	0.00126	0.00229	0.00137	0.00331	0.00434	-0.0150071	-0.0143136	-0.0126941	-0.0125115	-0.0118208	-0.0102013	-0.0137781	-0.0130846	-0.0114651
573.967	-0.00482027	-0.00426185	-0.00564452	-0.0183018	-0.0150804	-0.0109765	-0.0134815	-0.0102601	-0.0061562	-0.01404	-0.0108185	-0.00671462	-0.0126573	-0.00943583	-0.00533195	0.00264	0.00457	0.0056	-0.000364309	0.00157	0.0026	0.00171	0.00365	0.00468	-0.0161215	-0.0148301	-0.0117562	-0.0136756	-0.0123885	-0.00931462	-0.0152911	-0.0140097	-0.0109358
574.932	-0.00494738	-0.00430969	-0.00531492	-0.0189134	-0.0153457	-0.0103101	-0.013966	-0.0103983	-0.00536276	-0.0146037	-0.011036	-0.00600044	-0.0135985	-0.0100308	-0.00499521	0.00297	0.0049	0.00593	-4.64278e-05	0.00189	0.00292	0.00205	0.00399	0.00502	-0.016936	-0.0152983	-0.0112928	-0.0145573	-0.012926	-0.00892044	-0.0164386	-0.0148109	-0.0108054
575.896	-0.00492122	-0.00412188	-0.0053779	-0.0195169	-0.0154652	-0.0104571	-0.0145957	-0.010544	-0.00553591	-0.015395	-0.0113433	-0.00633525	-0.014139	-0.0100873	-0.00507923	0.0033	0.00523	0.00626	0.000270835	0.0022	0.00323	0.00239	0.00433	0.00536	-0.0178957	-0.015774	-0.0117959	-0.0156659	-0.0135433	-0.00956525	-0.0173104	-0.0151987	-0.0112206
576.86	-0.00481893	-0.00382007	-0.00550804	-0.019904	-0.015277	-0.0110863	-0.0150851	-0.0104581	-0.00626742	-0.0160839	-0.0114569	-0.00726628	-0.014396	-0.00976894	-0.00557831	0.00363	0.00556	0.00659	0.000587436	0.00252	0.00355	0.00273	0.00466	0.00569	-0.0187151	-0.0160181	-0.0128574	-0.0166714	-0.0139769	-0.0108163	-0.0178417	-0.0151447	-0.0119841
577.824	-0.00465218	-0.003398	-0.00548342	-0.0200251	-0.0145067	-0.0120287	-0.0153729	-0.00985456	-0.00737655	-0.0166271	-0.0111087	-0.00863073	-0.0145417	-0.00902333	-0.00654531	0.00396	0.00589	0.00692	0.000903235	0.00283	0.00386	0.00307	0.005	0.00603	-0.0193329	-0.0157446	-0.0142965	-0.0175303	-0.0139387	-0.0124907	-0.0180071	-0.0144188	-0.0129708
578.789	-0.00446921	-0.00301693	-0.00532509	-0.0196909	-0.0133989	-0.0131421	-0.0152217	-0.00892967	-0.00867288	-0.0166739	-0.0103819	-0.0101252	-0.0143658	-0.00807378	-0.00781699	0.00429	0.00622	0.00725	0.00122	0.00314	0.00417	0.00341	0.00533	0.00636	-0.0195117	-0.0151497	-0.0159229	-0.0178939	-0.0135219	-0.0142952	-0.0177784	-0.0134064	-0.0141796
579.753	-0.00432388	-0.00287913	-0.00492658	-0.0185716	-0.0119928	-0.0143058	-0.0142477	-0.00766888	-0.00998191	-0.0156925	-0.00911362	-0.0114267	-0.013645	-0.00706617	-0.00937921	0.00462	0.00654	0.00757	0.00153	0.00345	0.00449	0.00374	0.00566	0.0067	-0.0188677	-0.0142089	-0.0175519	-0.0172225	-0.0125636	-0.0159167	-0.0169917	-0.0123329	-0.0156859
580.717	-0.00421093	-0.00285527	-0.0044486	-0.0170387	-0.0106291	-0.015286	-0.0128278	-0.0064182	-0.0110751	-0.0141834	-0.00777386	-0.0124308	-0.0125901	-0.00618053	-0.0108374	0.00495	0.00686	0.0079	0.00185	0.00376	0.0048	0.00408	0.006	0.00703	-0.0177778	-0.0132782	-0.0189751	-0.0160334	-0.0115339	-0.0172308	-0.0160183	-0.0115288	-0.0172157
581.681	-0.00415884	-0.00296312	-0.0039886	-0.0152093	-0.00964449	-0.0159017	-0.0110505	-0.00548566	-0.0117429	-0.0122462	-0.00668137	-0.0129386	-0.0112207	-0.00565589	-0.0119131	0.00527	0.00719	0.00822	0.00216	0.00407	0.0051	0.00441	0.00633	0.00736	-0.0163205	-0.0126757	-0.0199629	-0.0144062	-0.0107514	-0.0180386	-0.0150538	-0.011409	-0.0186962
582.646	-0.00412028	-0.00296364	-0.00362995	-0.0135162	-0.00909105	-0.0158742	-0.00939597	-0.00497077	-0.0117539	-0.0105526	-0.0061274	-0.0129106	-0.00988629	-0.0054611	-0.0122443	0.0056	0.00751	0.00854	0.00247	0.00438	0.00541	0.00474	0.00665	0.00769	-0.014996	-0.0124808	-0.0202939	-0.0130226	-0.0105074	-0.0183206	-0.0143612	-0.011846	-0.0196692
583.61	-0.00407471	-0.00260449	-0.00363104	-0.012624	-0.00944946	-0.0149566	-0.00854927	-0.00537475	-0.0108819	-0.0100195	-0.00684496	-0.0123521	-0.00899294	-0.00581842	-0.0113255	0.00592	0.00783	0.00886	0.00278	0.00469	0.00572	0.00507	0.00698	0.00801	-0.0144693	-0.0132047	-0.0197419	-0.0127995	-0.011535	-0.0180721	-0.0145428	-0.0132783	-0.0198154
584.574	-0.00397029	-0.00194334	-0.00356428	-0.0119544	-0.00977088	-0.0128725	-0.00798411	-0.00580058	-0.00890222	-0.0100111	-0.00782753	-0.0109292	-0.00839013	-0.0062066	-0.00930823	0.00624	0.00815	0.00918	0.00309	0.00499	0.00602	0.0054	0.00731	0.00834	-0.0142241	-0.0139506	-0.0180822	-0.0131011	-0.0128175	-0.0169492	-0.0147665	-0.014493	-0.0186246
585.538	-0.00370127	-0.000734788	-0.00292709	-0.010755	-0.0088459	-0.00829708	-0.00705373	-0.00514463	-0.00459582	-0.0100202	-0.00811111	-0.0075623	-0.00782791	-0.00591881	-0.00536999	0.00656	0.00846	0.00949	0.00339	0.0053	0.00633	0.00573	0.00763	0.00866	-0.0136137	-0.0136046	-0.0140858	-0.0134102	-0.0134111	-0.0138923	-0.0137953	-0.0137862	-0.0142673
586.503	-0.00340885	0.000364277	-0.00220279	-0.0102134	-0.00793691	-0.00412912	-0.00680456	-0.00452806	-0.00072027	-0.0105777	-0.00830118	-0.00449339	-0.00801061	-0.00573412	-0.00192633	0.00688	0.00878	0.00981	0.0037	0.0056	0.00663	0.00605	0.00795	0.00898	-0.0136846	-0.0133081	-0.0105303	-0.0142777	-0.0139012	-0.0111234	-0.0134354	-0.0130589	-0.0102811
587.467	-0.00328212	0.000523941	-0.00173177	-0.0122067	-0.00825107	-0.00350074	-0.00892463	-0.00496896	-0.000218624	-0.0127307	-0.00877501	-0.00402468	-0.010475	-0.0065193	-0.00176897	0.00719	0.00909	0.01012	0.004	0.0059	0.00693	0.00638	0.00827	0.0093	-0.0161146	-0.014059	-0.0103386	-0.0167307	-0.014675	-0.0109547	-0.0161736	-0.0141079	-0.0103876
588.431	-0.00307172	0.000508659	-0.00144023	-0.0139139	-0.00874466	-0.00438706	-0.0108422	-0.00567294	-0.00131534	-0.0144225	-0.00925332	-0.00489572	-0.0124736	-0.00730443	-0.00294683	0.00751	0.0094	0.01043	0.00431	0.0062	0.00723	0.0067	0.00859	0.00962	-0.0183522	-0.0150729	-0.0117453	-0.0187325	-0.0154533	-0.0121257	-0.0188019	-0.0155226	-0.012195
589.395	-0.00253896	0.000862803	-0.00153307	-0.0123582	-0.008735	-0.00619449	-0.00981921	-0.00619604	-0.00365553	-0.013221	-0.0095978	-0.0070573	-0.0108251	-0.00720193	-0.00466143	0.00782	0.00971	0.01074	0.00461	0.0065	0.00753	0.00702	0.00891	0.00994	-0.0176392	-0.015906	-0.0143955	-0.017831	-0.0160978	-0.0145873	-0.018179	-0.0164458	-0.0149353
590.36	-0.00184096	0.00141672	-0.00151463	-0.00988305	-0.00834606	-0.00776127	-0.00804209	-0.0065051	-0.00592031	-0.0112998	-0.00976277	-0.00917799	-0.00836842	-0.00683143	-0.00624664	0.00813	0.01002	0.01105	0.00491	0.00679	0.00782	0.00734	0.00922	0.01025	-0.0161721	-0.0165251	-0.0169703	-0.0162098	-0.0165528	-0.016998	-0.0166614	-0.0170044	-0.0174496
591.324	-0.00101785	0.00225445	-0.00089603	-0.00790709	-0.0074153	-0.00750919	-0.00688923	-0.00639745	-0.00649134	-0.0101615	-0.00966975	-0.00976364	-0.00701106	-0.00651927	-0.00661316	0.00844	0.01032	0.01135	0.0052	0.00709	0.00812	0.00765	0.00954	0.01057	-0.0153292	-0.0167174	-0.0178413	-0.0153615	-0.0167598	-0.0178836	-0.0156032	-0.0170014	-0.0181253
592.288	-0.000181867	0.00315926	0.000138153	-0.0062282	-0.00611956	-0.00609398	-0.00604633	-0.00593769	-0.00591211	-0.00938746	-0.00927882	-0.00925324	-0.00636635	-0.00625771	-0.00623213	0.00875	0.01062	0.01165	0.0055	0.00738	0.00841	0.00797	0.00985	0.01088	-0.0147963	-0.0165577	-0.0175621	-0.0148875	-0.0166588	-0.0176632	-0.0148506	-0.0166219	-0.0176263
593.252	0.000539381	0.00395423	0.00172957	-0.00558043	-0.00454551	-0.00322001	-0.00611981	-0.00508489	-0.00375939	-0.00953466	-0.00849973	-0.00717424	-0.00731001	-0.00627508	-0.00494958	0.00905	0.01093	0.01195	0.00579	0.00767	0.0087	0.00828	0.01015	0.01118	-0.0151698	-0.0160149	-0.0157094	-0.0153247	-0.0161697	-0.0158742	-0.0151257	-0.0159608	-0.0156653
594.216	0.00115197	0.00460393	0.00338841	-0.00457401	-0.00280105	-0.00016307	-0.00572598	-0.00395302	-0.00131504	-0.00917794	-0.00740498	-0.004767	-0.00796242	-0.00618946	-0.00355148	0.00935	0.01122	0.01225	0.00609	0.00796	0.00899	0.00859	0.01046	0.01149	-0.015076	-0.015173	-0.013565	-0.0152679	-0.015365	-0.013757	-0.0150554	-0.0151524	-0.0135444
595.181	0.00155015	0.0048225	0.00455625	-0.00138727	-0.00106809	0.00140201	-0.00293742	-0.00261824	-0.000148134	-0.00620977	-0.00589059	-0.00342049	-0.00594351	-0.00562434	-0.00315423	0.00965	0.01152	0.01255	0.00638	0.00824	0.00927	0.0089	0.01076	0.01179	-0.0125874	-0.0141382	-0.0126981	-0.0125898	-0.0141306	-0.0126905	-0.0128579	-0.0143987	-0.0129586
596.145	0.00194178	0.0051844	0.00558053	0.00195011	0.000788688	0.00296801	8.3281e-06	-0.0011531	0.00102622	-0.00323429	-0.00439571	-0.00221639	-0.00363042	-0.00479184	-0.00261252	0.00995	0.01181	0.01284	0.00666	0.00853	0.00955	0.0092	0.01107	0.01209	-0.00994167	-0.0129631	-0.0118138	-0.00989429	-0.0129257	-0.0117664	-0.0104603	-0.0134917	-0.0123324
597.109	0.00249281	0.00641726	0.00647098	0.00368861	0.00278631	0.00623933	0.0011958	0.000293502	0.00374652	-0.00272865	-0.00363095	-0.000177934	-0.00278237	-0.00368467	-0.000231651	0.01025	0.01211	0.01313	0.00695	0.00881	0.00984	0.00951	0.01136	0.01239	-0.0090542	-0.0118165	-0.00938348	-0.00967865	-0.012441	-0.0100179	-0.00938019	-0.0121325	-0.00970948
598.073	0.00322331	0.00777574	0.00768241	0.00480946	0.00509776	0.00890621	0.00158615	0.00187445	0.0056829	-0.00296628	-0.00267798	0.00113047	-0.00287295	-0.00258464	0.0012238	0.01054	0.01239	0.01342	0.00723	0.00909	0.01011	0.00981	0.01166	0.01269	-0.00895385	-0.0105155	-0.0077371	-0.0101963	-0.011768	-0.00897953	-0.00913364	-0.0106953	-0.00791689
599.038	0.00428489	0.00856818	0.00990097	0.00564177	0.00834208	0.00835736	0.00135688	0.00405719	0.00407247	-0.00292641	-0.000226099	-0.000210824	-0.0042592	-0.00155888	-0.00154361	0.01083	0.01268	0.01371	0.00751	0.00936	0.01039	0.0101	0.01195	0.01298	-0.00947312	-0.00862281	-0.00963753	-0.0104364	-0.0095861	-0.0106008	-0.010088	-0.0092377	-0.0102524
600.002	0.00544892	0.00936114	0.0124424	0.0063924	0.0111981	0.0072018	0.000943481	0.00574922	0.00175288	-0.00296874	0.001837	-0.00215934	-0.00605	-0.00124425	-0.0052406	0.01112	0.01296	0.01399	0.00779	0.00964	0.01067	0.0104	0.01225	0.01327	-0.0101765	-0.00721078	-0.0122371	-0.0107587	-0.007803	-0.0128293	-0.0112671	-0.0083114	-0.0133277
600.966	0.00656797	0.0106545	0.0149785	0.00766911	0.0122589	0.00760464	0.00110114	0.00569091	0.00103667	-0.00298535	0.00160442	-0.00304982	-0.00730939	-0.00271961	-0.00737385	0.0114	0.01325	0.01427	0.00807	0.00991	0.01094	0.01069	0.01254	0.01356	-0.0102989	-0.00755909	-0.0132333	-0.0110554	-0.00830558	-0.0139898	-0.0114234	-0.00868366	-0.0143579
601.93	0.00755004	0.0119566	0.0171273	0.00859834	0.0124011	0.00828634	0.00104831	0.00485105	0.000736297	-0.00335824	0.000444498	-0.00367025	-0.00852894	-0.0047262	-0.00884095	0.01169	0.01352	0.01455	0.00834	0.01018	0.01121	0.01098	0.01282	0.01385	-0.0106417	-0.00866895	-0.0138137	-0.0116982	-0.0097355	-0.0148803	-0.0116285	-0.00966578	-0.0148105
602.894	0.00828511	0.0130206	0.0183913	0.00840879	0.011989	0.00883299	0.000123683	0.00370384	0.000547874	-0.00461181	-0.00103165	-0.00418762	-0.00998249	-0.00640233	-0.0095583	0.01197	0.0138	0.01482	0.00862	0.01045	0.01147	0.01127	0.0131	0.01413	-0.0118463	-0.0100962	-0.0142721	-0.0132318	-0.0114816	-0.0156576	-0.0126503	-0.0109001	-0.0150861
603.859	0.00867981	0.0136124	0.0187889	0.00740155	0.0111533	0.00881276	-0.00127826	0.00247346	0.000132956	-0.00621089	-0.00245917	-0.00479968	-0.0113873	-0.0076356	-0.0099761	0.01225	0.01407	0.0151	0.00889	0.01071	0.01174	0.01156	0.01339	0.01441	-0.0135283	-0.0115965	-0.014967	-0.0151009	-0.0131692	-0.0165397	-0.0141425	-0.0122208	-0.0155813
604.823	0.00860734	0.0133471	0.0180501	0.00535105	0.0103219	0.00751485	-0.00325629	0.00171455	-0.00109249	-0.00799602	-0.00302518	-0.00583222	-0.012699	-0.00772819	-0.0105352	0.01252	0.01434	0.01537	0.00915	0.01098	0.012	0.01184	0.01366	0.01469	-0.0157763	-0.0126254	-0.0164625	-0.017146	-0.0140052	-0.0178322	-0.0163086	-0.0131577	-0.0169948
605.787	0.00805791	0.0124305	0.0165425	0.00306589	0.00896784	0.00536233	-0.00499202	0.000909926	-0.00269558	-0.0093646	-0.00346265	-0.00706817	-0.0134766	-0.00757462	-0.0111801	0.01279	0.01461	0.01563	0.00942	0.01124	0.01226	0.01212	0.01394	0.01496	-0.017782	-0.0137001	-0.0183256	-0.0187846	-0.0147027	-0.0193282	-0.0182475	-0.0141656	-0.0187911
606.751	0.00689199	0.0106857	0.0144031	0.00161011	0.00679176	0.00246403	-0.00528188	-0.000100232	-0.00442796	-0.00907562	-0.00389397	-0.0082217	-0.012793	-0.00761137	-0.0119391	0.01306	0.01488	0.0159	0.00968	0.01149	0.01251	0.0124	0.01421	0.01523	-0.0183419	-0.0149802	-0.020328	-0.0187556	-0.015384	-0.0207317	-0.018625	-0.0152533	-0.0206011
607.716	0.00537196	0.00887659	0.0120534	-8.26361e-06	0.00353858	-0.000948183	-0.00538023	-0.00183339	-0.00632015	-0.00888485	-0.00533801	-0.00982477	-0.0120617	-0.00851482	-0.0130016	0.01333	0.01514	0.01616	0.00994	0.01175	0.01277	0.01267	0.01448	0.0155	-0.0187102	-0.0169734	-0.0224801	-0.0188249	-0.017088	-0.0225948	-0.0189148	-0.017178	-0.0226848
608.68	0.0035476	0.00789567	0.00995985	-0.00269263	-0.00177391	-0.00487781	-0.00624023	-0.00532152	-0.00842542	-0.0105883	-0.00966958	-0.0127735	-0.0126525	-0.0117338	-0.0148377	0.01359	0.0154	0.01642	0.01019	0.012	0.01302	0.01294	0.01474	0.01576	-0.0198302	-0.0207215	-0.0248454	-0.0207783	-0.0216696	-0.0257935	-0.0203999	-0.0212812	-0.0254051
609.644	0.0019172	0.00717967	0.00812376	-0.00564466	-0.00726368	-0.0085099	-0.00756186	-0.00918088	-0.0104271	-0.0128243	-0.0144434	-0.0156896	-0.0137684	-0.0153874	-0.0166337	0.01385	0.01565	0.01667	0.01045	0.01225	0.01327	0.01321	0.01501	0.01603	-0.0214119	-0.0248309	-0.0270971	-0.0232743	-0.0266934	-0.0289596	-0.022379	-0.025798	-0.0280642
610.608	0.00111704	0.00645994	0.00672512	-0.00837497	-0.0113442	-0.0110038	-0.00949201	-0.0124613	-0.0121208	-0.0148349	-0.0178042	-0.0174637	-0.0151001	-0.0180693	-0.0177289	0.01411	0.0159	0.01692	0.0107	0.01249	0.01351	0.01347	0.01527	0.01628	-0.023602	-0.0283613	-0.0290408	-0.0255349	-0.0302942	-0.0309737	-0.0246467	-0.029416	-0.0300855
611.573	0.000782937	0.00574522	0.00569436	-0.0108601	-0.0141112	-0.0124401	-0.0116431	-0.0148941	-0.013223	-0.0166053	-0.0198564	-0.0181853	-0.0165545	-0.0198055	-0.0181345	0.01436	0.01615	0.01717	0.01095	0.01273	0.01375	0.01373	0.01552	0.01654	-0.0260031	-0.0310441	-0.030393	-0.0275553	-0.0325864	-0.0319353	-0.0269688	-0.0320098	-0.0313587
612.537	0.000852317	0.00484691	0.00506555	-0.0128559	-0.0147821	-0.0123049	-0.0137082	-0.0156344	-0.0131572	-0.0177028	-0.019629	-0.0171518	-0.0179214	-0.0198477	-0.0173704	0.01461	0.0164	0.01741	0.01119	0.01297	0.01399	0.01399	0.01578	0.01679	-0.0283182	-0.0320344	-0.0305672	-0.0288928	-0.032599	-0.0311418	-0.0289957	-0.032712	-0.0312448
613.501	0.0010567	0.00408834	0.00470784	-0.0145354	-0.0144046	-0.011541	-0.0155921	-0.0154613	-0.0125977	-0.0186237	-0.0184929	-0.0156293	-0.0192432	-0.0191124	-0.0162488	0.01486	0.01664	0.01766	0.01143	0.01321	0.01423	0.01425	0.01603	0.01704	-0.0304521	-0.0321013	-0.0302577	-0.0300537	-0.0317029	-0.0298593	-0.0308477	-0.0324969	-0.0306433
614.465	0.00108188	0.0037547	0.00450871	-0.0160914	-0.0136437	-0.0108222	-0.0171732	-0.0147256	-0.0119041	-0.0198461	-0.0173984	-0.0145769	-0.0206001	-0.0181525	-0.0153309	0.01511	0.01688	0.01789	0.01167	0.01344	0.01446	0.0145	0.01627	0.01729	-0.0322832	-0.0316056	-0.0297941	-0.0315161	-0.0308384	-0.0290369	-0.0326208	-0.0319432	-0.0301417
615.43	0.00100248	0.00377182	0.00444718	-0.0172213	-0.012864	-0.0104418	-0.0182237	-0.0138665	-0.0114443	-0.0209931	-0.0166358	-0.0142137	-0.0216684	-0.0173112	-0.014889	0.01535	0.01712	0.01813	0.01191	0.01367	0.01469	0.01475	0.01652	0.01753	-0.0335737	-0.0309865	-0.0295743	-0.0329031	-0.0303058	-0.0289037	-0.0340171	-0.0314298	-0.0300177
616.394	0.000702607	0.00426773	0.00443122	-0.017771	-0.0127815	-0.0111178	-0.0184736	-0.0134841	-0.0118204	-0.0220387	-0.0170492	-0.0153855	-0.0222022	-0.0172127	-0.015549	0.01559	0.01735	0.01836	0.01214	0.0139	0.01491	0.01499	0.01676	0.01777	-0.0340636	-0.0308341	-0.0301804	-0.0341787	-0.0309492	-0.0302955	-0.0348258	-0.0316063	-0.0309526
617.358	0.000439638	0.00492106	0.00456146	-0.0174878	-0.0130058	-0.0122494	-0.0179274	-0.0134454	-0.0126891	-0.0224088	-0.0179268	-0.0171705	-0.0220492	-0.0175672	-0.0168109	0.01582	0.01758	0.01859	0.01237	0.01413	0.01514	0.01523	0.01699	0.018	-0.0337474	-0.0310254	-0.0312791	-0.0347788	-0.0320568	-0.0323105	-0.0348409	-0.0321189	-0.0323726
618.322	0.000460759	0.00545239	0.00484727	-0.0156651	-0.0135947	-0.0139672	-0.0161259	-0.0140555	-0.014428	-0.0211175	-0.0190471	-0.0194196	-0.0205124	-0.018442	-0.0188145	0.01605	0.0178	0.01881	0.01259	0.01435	0.01536	0.01547	0.01723	0.01824	-0.0321759	-0.0318555	-0.033238	-0.0337075	-0.0333971	-0.0347796	-0.033359	-0.0330486	-0.0344311
619.287	0.000680617	0.00586398	0.00547035	-0.01351	-0.0139201	-0.014796	-0.0141906	-0.0146007	-0.0154766	-0.019374	-0.0197841	-0.02066	-0.0189803	-0.0193904	-0.0202663	0.01628	0.01803	0.01903	0.01282	0.01456	0.01557	0.01571	0.01746	0.01846	-0.0304706	-0.0326307	-0.0345066	-0.032194	-0.0343441	-0.03623	-0.0316415	-0.0338016	-0.0356775
620.251	0.0010871	0.0058941	0.00696699	-0.0123056	-0.0134165	-0.012843	-0.0133927	-0.0145036	-0.0139302	-0.0181997	-0.0193105	-0.0187371	-0.0192726	-0.0203834	-0.01981	0.0165	0.01824	0.01925	0.01304	0.01478	0.01579	0.01594	0.01768	0.01869	-0.0298927	-0.0327436	-0.0331802	-0.0312397	-0.0340905	-0.0345271	-0.0310333	-0.0338842	-0.0343208
621.215	0.00170767	0.0060553	0.00828275	-0.0111165	-0.0119537	-0.0094916	-0.0128242	-0.0136613	-0.0111993	-0.0171718	-0.018009	-0.0155469	-0.0193993	-0.0202364	-0.0177743	0.01672	0.01846	0.01947	0.01325	0.01499	0.016	0.01617	0.0179	0.01891	-0.0295442	-0.0321213	-0.0306693	-0.0304218	-0.032999	-0.0315469	-0.0305605	-0.0331276	-0.0316756
622.179	0.00246186	0.00683717	0.00775731	-0.0101171	-0.00952311	-0.00566798	-0.012579	-0.011985	-0.00812984	-0.0169543	-0.0163603	-0.0125052	-0.0178744	-0.0172804	-0.0134253	0.01694	0.01867	0.01968	0.01347	0.0152	0.0162	0.01639	0.01812	0.01913	-0.029519	-0.030655	-0.0278098	-0.0304243	-0.0315603	-0.0287052	-0.0301212	-0.0312572	-0.0284121
623.143	0.00366132	0.00804696	0.00774454	-0.00726134	-0.00519475	-0.000850086	-0.0109227	-0.00885606	-0.0045114	-0.0153083	-0.0132417	-0.00889705	-0.0150059	-0.0129393	-0.00859463	0.01715	0.01888	0.01988	0.01368	0.0154	0.0164	0.01661	0.01834	0.01934	-0.0280727	-0.0277361	-0.0243914	-0.0289883	-0.0286417	-0.025297	-0.0284038	-0.0280672	-0.0247225
624.108	0.00508701	0.00903259	0.00981911	-0.000510221	0.00175828	0.004662	-0.00559723	-0.00332873	-0.00042501	-0.00954281	-0.00727431	-0.00437059	-0.0103293	-0.00806084	-0.00515711	0.01736	0.01908	0.02009	0.01388	0.0156	0.0166	0.01683	0.01855	0.01955	-0.0229572	-0.0224087	-0.020515	-0.0234228	-0.0228743	-0.0209706	-0.0235511	-0.0230026	-0.0210989
625.072	0.00825051	0.0116616	0.0146584	0.00998294	0.0119543	0.0124085	0.00173242	0.0037038	0.004158	-0.00167866	0.000292718	0.000746918	-0.00467542	-0.00270404	-0.00224984	0.01757	0.01928	0.02028	0.01408	0.0158	0.0168	0.01704	0.01876	0.01976	-0.0158376	-0.0155762	-0.016122	-0.0157587	-0.0155073	-0.0160531	-0.0170672	-0.0168159	-0.0173617
626.036	0.0148976	0.0178876	0.0240065	0.0259183	0.0273333	0.0244869	0.0110207	0.0124357	0.00958932	0.00803063	0.00944566	0.00659928	0.00191176	0.00332679	0.000480414	0.01777	0.01948	0.02048	0.01428	0.01599	0.01699	0.01725	0.01896	0.01996	-0.00674933	-0.0070443	-0.0108907	-0.00624937	-0.00654434	-0.0103907	-0.00919887	-0.00949384	-0.0133402
627	0.0241066	0.0268002	0.0362375	0.0437745	0.0446574	0.0389254	0.0196678	0.0205508	0.0148188	0.0169742	0.0178571	0.0121252	0.007537	0.00841992	0.00268795	0.01797	0.01967	0.02067	0.01448	0.01618	0.01718	0.01746	0.01916	0.02016	0.00169784	0.000880763	-0.00585121	0.0024942	0.00167713	-0.00505484	-0.00192087	-0.00273794	-0.00946991
627.965	0.0364031	0.0391132	0.0512618	0.0619046	0.0627324	0.0557522	0.0255015	0.0263294	0.0193491	0.0227914	0.0236192	0.016639	0.0106428	0.0114706	0.00449041	0.01817	0.01986	0.02086	0.01467	0.01637	0.01736	0.01766	0.01936	0.02035	0.0073315	0.00646936	-0.00151087	0.00812137	0.00724923	-0.000721005	0.00300277	0.00213064	-0.0058396
628.929	0.0491913	0.0519075	0.0662139	0.0763856	0.0773673	0.0710647	0.0271944	0.0281761	0.0218734	0.0244781	0.0254599	0.0191572	0.0101717	0.0111534	0.00485077	0.01836	0.02005	0.02104	0.01486	0.01655	0.01754	0.01786	0.01955	0.02055	0.00883435	0.00812608	0.000833436	0.00961814	0.00890987	0.00161723	0.00472259	0.00401431	-0.00328833
629.893	0.0606769	0.0632716	0.0787197	0.0821655	0.0835563	0.0815117	0.0214886	0.0228794	0.0208348	0.0188939	0.0202848	0.0182401	0.00344586	0.00483667	0.00279202	0.01854	0.02023	0.02122	0.01504	0.01673	0.01772	0.01805	0.01974	0.02073	0.00294861	0.00264942	-0.000385233	0.00385394	0.00355475	0.000520101	0.000882602	0.000583411	-0.00245124
630.857	0.068981	0.0708964	0.0872155	0.0809845	0.0825491	0.0854671	0.0120034	0.013568	0.0164861	0.0100881	0.0116527	0.0145707	-0.00623105	-0.00466645	-0.0017484	0.01873	0.02041	0.0214	0.01523	0.0169	0.0179	0.01825	0.01992	0.02092	-0.00672659	-0.00684199	-0.00491394	-0.00514195	-0.00524735	-0.0033293	-0.00573157	-0.00583697	-0.00391892
631.822	0.0715987	0.0712763	0.0896517	0.0718376	0.0722274	0.0788509	0.000238974	0.000628767	0.00725219	0.000561388	0.000951181	0.00757461	-0.0178141	-0.0174243	-0.0108008	0.01891	0.02058	0.02157	0.0154	0.01708	0.01807	0.01843	0.02011	0.0211	-0.018671	-0.0199512	-0.0143178	-0.0148386	-0.0161288	-0.0104954	-0.0136026	-0.0148928	-0.00925935
632.786	0.0686135	0.0660893	0.0851129	0.0579077	0.0576891	0.0656742	-0.0107057	-0.0109244	-0.0029393	-0.00818157	-0.00840021	-0.000415134	-0.0272051	-0.0274238	-0.0194387	0.01908	0.02075	0.02174	0.01558	0.01724	0.01823	0.01862	0.02028	0.02127	-0.0297857	-0.0316744	-0.0246793	-0.0237616	-0.0256402	-0.0186451	-0.0211717	-0.0230503	-0.0160552
633.75	0.0576705	0.0543768	0.0694264	0.0404464	0.0428663	0.0464673	-0.0172241	-0.0148042	-0.0112032	-0.0139303	-0.0115105	-0.00790946	-0.02898	-0.0265602	-0.0229591	0.01926	0.02092	0.0219	0.01575	0.01741	0.01839	0.01879	0.02046	0.02144	-0.0364841	-0.0357242	-0.0331032	-0.0296803	-0.0289205	-0.0262995	-0.0266223	-0.0258725	-0.0232515
634.714	0.0435805	0.0405439	0.0503142	0.0242419	0.029137	0.0275929	-0.0193387	-0.0144435	-0.0159876	-0.016302	-0.0114069	-0.012951	-0.0260723	-0.0211772	-0.0227213	0.01942	0.02108	0.02206	0.01591	0.01757	0.01855	0.01897	0.02062	0.02161	-0.0387587	-0.0355235	-0.0380476	-0.032212	-0.0289769	-0.031501	-0.0290906	-0.0258454	-0.0283795
635.678	0.0301404	0.0288351	0.0343794	0.015185	0.0188648	0.0161254	-0.0149554	-0.0112756	-0.014015	-0.0136501	-0.00997032	-0.0127097	-0.0191944	-0.0155146	-0.018254	0.01959	0.02124	0.02222	0.01608	0.01772	0.01871	0.01914	0.02079	0.02177	-0.0345454	-0.0325156	-0.036235	-0.0297301	-0.0276903	-0.0314197	-0.0264281	-0.0243983	-0.0281176
636.643	0.0180369	0.0187738	0.0208049	0.0112189	0.0130254	0.0104594	-0.00681794	-0.00501147	-0.00757744	-0.00755488	-0.0057484	-0.00831437	-0.00958594	-0.00777947	-0.0103454	0.01975	0.02139	0.02237	0.01624	0.01788	0.01886	0.01931	0.02095	0.02193	-0.0265679	-0.0264015	-0.0299474	-0.0237949	-0.0236284	-0.0271744	-0.020561	-0.0203945	-0.0239405
637.607	0.00949621	0.0114512	0.0112848	0.0126093	0.0138263	0.0118738	0.00311312	0.00433005	0.00237758	0.00115808	0.00237501	0.000422547	0.0013245	0.00254143	0.000588966	0.0199	0.02154	0.02252	0.01639	0.01803	0.01901	0.01947	0.02111	0.02209	-0.0167869	-0.01721	-0.0201424	-0.0152319	-0.015655	-0.0185875	-0.012561	-0.0129841	-0.0159165
638.571	0.00369654	0.00640815	0.00488752	0.018279	0.0199359	0.0187896	0.0145824	0.0162394	0.015093	0.0118708	0.0135278	0.0123814	0.0133915	0.0150484	0.013902	0.02006	0.02169	0.02266	0.01654	0.01817	0.01915	0.01963	0.02126	0.02224	-0.00547755	-0.00545063	-0.00756699	-0.00466916	-0.00464223	-0.00676859	-0.0028136	-0.00278668	-0.00491304
639.535	0.000921785	0.00363338	0.00140863	0.0274353	0.0315192	0.0305748	0.0265135	0.0305974	0.0296531	0.0238019	0.0278858	0.0269415	0.0260266	0.0301106	0.0291662	0.0202	0.02183	0.0228	0.01669	0.01831	0.01929	0.01979	0.02141	0.02239	0.00631349	0.00876742	0.00685305	0.00711189	0.00957583	0.00765146	0.00795531	0.0104192	0.00849487
640.5	8.07286e-05	0.00287351	0.000359924	0.0394899	0.0462944	0.0456671	0.0394092	0.0462137	0.0455864	0.0366164	0.0434209	0.0427936	0.03913	0.0459345	0.0453072	0.02035	0.02196	0.02294	0.01683	0.01845	0.01942	0.01994	0.02155	0.02253	0.0190592	0.0242537	0.0226464	0.0197864	0.0249709	0.0233736	0.0197248	0.0249194	0.0233121
641.464	-2.55916e-05	0.00387614	0.00104779	0.0540994	0.0623498	0.0629806	0.054125	0.0623754	0.0630062	0.0502233	0.0584737	0.0591045	0.0530516	0.061302	0.0619328	0.02049	0.0221	0.02307	0.01697	0.01858	0.01955	0.02008	0.0217	0.02267	0.033635	0.0402754	0.0399362	0.0332533	0.0398937	0.0395545	0.0328959	0.0395263	0.039187
642.428	0.00121004	0.00662705	0.00388406	0.0697371	0.0787403	0.0804534	0.0685271	0.0775302	0.0792433	0.0631101	0.0721132	0.0738263	0.065853	0.0748562	0.0765693	0.02062	0.02223	0.0232	0.01711	0.01871	0.01968	0.02023	0.02183	0.0228	0.0479071	0.0553002	0.0560433	0.0460001	0.0534032	0.0541463	0.0454274	0.0528305	0.0535736
643.392	0.00394326	0.0107488	0.00906954	0.0857414	0.0948158	0.0961925	0.0817981	0.0908725	0.0922493	0.0749925	0.084067	0.0854437	0.0766718	0.0857463	0.087123	0.02075	0.02235	0.02332	0.01724	0.01884	0.01981	0.02037	0.02196	0.02293	0.0610481	0.0685225	0.0689293	0.0577525	0.065227	0.0656337	0.0564197	0.0639042	0.0643109
644.357	0.00832987	0.0170786	0.0165438	0.0991737	0.107779	0.108606	0.0908438	0.0994493	0.100276	0.0820951	0.0907006	0.091527	0.0826299	0.0912355	0.0920619	0.02088	0.02247	0.02344	0.01737	0.01896	0.01992	0.0205	0.02209	0.02306	0.0699638	0.0769793	0.0768357	0.0647251	0.0717406	0.071607	0.0629698	0.0699853	0.0698417
645.321	0.0151218	0.0271804	0.0270315	0.106683	0.114403	0.115447	0.0915614	0.0992816	0.100325	0.0795028	0.0872229	0.0882665	0.0796518	0.0873719	0.0884155	0.021	0.02259	0.02355	0.01749	0.01908	0.02004	0.02063	0.02222	0.02318	0.0705614	0.0766916	0.0767751	0.0620128	0.0681429	0.0682265	0.0610008	0.067131	0.0672145
646.285	0.0226863	0.0384959	0.0383777	0.108845	0.115328	0.116783	0.0861587	0.0926419	0.094097	0.0703492	0.0768324	0.0782875	0.0704673	0.0769505	0.0784056	0.02112	0.0227	0.02366	0.01761	0.01919	0.02015	0.02076	0.02234	0.0233	0.0650387	0.0699419	0.070437	0.0527392	0.0576424	0.0581375	0.0530832	0.0579864	0.0584816
647.249	0.0298057	0.0494634	0.0490116	0.104256	0.109131	0.111031	0.0744501	0.079325	0.0812251	0.0547924	0.0596673	0.0615674	0.0552442	0.0601191	0.0620192	0.02124	0.02281	0.02377	0.01773	0.0193	0.02026	0.02088	0.02245	0.02341	0.0532101	0.056515	0.0574551	0.0370624	0.0403673	0.0413074	0.0392881	0.042593	0.0435331
648.213	0.0359868	0.0586559	0.0579062	0.0955003	0.0987738	0.100896	0.0595134	0.0627869	0.0649094	0.0368444	0.0401179	0.0422404	0.0375941	0.0408675	0.04299	0.02135	0.02291	0.02387	0.01784	0.0194	0.02036	0.021	0.02256	0.02352	0.0381634	0.0398769	0.0410394	0.0190044	0.0207179	0.0218804	0.0230667	0.0247802	0.0259427
649.178	0.0400695	0.0636603	0.0631124	0.0840506	0.0861037	0.0876528	0.0439811	0.0460342	0.0475833	0.0203903	0.0224434	0.0239926	0.0209381	0.0229912	0.0245404	0.02146	0.02301	0.02397	0.01795	0.01951	0.02046	0.02111	0.02267	0.02363	0.0225211	0.0230242	0.0236133	0.00244031	0.00293343	0.00353258	0.00769206	0.00818518	0.00877432
650.142	0.0428371	0.0658727	0.0658263	0.0718425	0.0730465	0.0740176	0.0290053	0.0302094	0.0311804	0.00596976	0.0071738	0.00814486	0.00601612	0.00722016	0.00819122	0.02156	0.02311	0.02406	0.01805	0.0196	0.02056	0.02122	0.02277	0.02373	0.00744533	0.00709937	0.00712043	-0.0120802	-0.0124262	-0.0124151	-0.00618859	-0.00653456	-0.0065235
651.106	0.0442956	0.0651267	0.0659159	0.0610555	0.061961	0.0628723	0.0167599	0.0176654	0.0185767	-0.00407112	-0.00316563	-0.00225433	-0.00486034	-0.00395486	-0.00304356	0.02166	0.0232	0.02415	0.01815	0.0197	0.02065	0.02133	0.02287	0.02382	-0.00490006	-0.00553458	-0.00557327	-0.0222211	-0.0228656	-0.0229043	-0.0163858	-0.0170203	-0.017059
652.07	0.0456175	0.0636972	0.0654161	0.0524302	0.0533948	0.0549958	0.00681274	0.00777725	0.00937831	-0.011267	-0.0103025	-0.0087014	-0.0129859	-0.0120213	-0.0104203	0.02175	0.02329	0.02424	0.01825	0.01979	0.02073	0.02143	0.02297	0.02392	-0.0149373	-0.0155127	-0.0148617	-0.029517	-0.0300925	-0.0294314	-0.0242235	-0.0247989	-0.0241479
653.035	0.04787	0.0636219	0.066037	0.0477124	0.0490099	0.0530935	-0.000157617	0.00113995	0.00522348	-0.0159096	-0.014612	-0.0105285	-0.0183246	-0.0170271	-0.0129435	0.02184	0.02337	0.02432	0.01834	0.01987	0.02082	0.02152	0.02306	0.024	-0.0219976	-0.0222301	-0.0190965	-0.0342496	-0.034482	-0.0313485	-0.0297478	-0.0299902	-0.0268467
653.999	0.0513752	0.065447	0.0686218	0.0460654	0.0478213	0.0542669	-0.00530981	-0.00355385	0.00289169	-0.0193816	-0.0176256	-0.0111801	-0.0225564	-0.0208004	-0.0143549	0.02192	0.02345	0.02439	0.01842	0.01995	0.0209	0.02162	0.02314	0.02409	-0.0272298	-0.0270038	-0.0214983	-0.0378016	-0.0375756	-0.0320801	-0.0346532	-0.0344172	-0.0289217
654.963	0.0575171	0.0713908	0.0760861	0.0476382	0.0501888	0.0568869	-0.00987887	-0.00732832	-0.000630216	-0.0237525	-0.021202	-0.0145039	-0.0284479	-0.0258973	-0.0191992	0.02201	0.02353	0.02447	0.01851	0.02003	0.02097	0.0217	0.02322	0.02417	-0.0318889	-0.0308583	-0.0251002	-0.0422625	-0.041232	-0.0354739	-0.0419868	-0.0409562	-0.0352081
655.927	0.0641773	0.0784743	0.0839228	0.0512202	0.0537394	0.0598511	-0.0129571	-0.0104378	-0.00432614	-0.0272541	-0.0247349	-0.0186232	-0.0327026	-0.0301833	-0.0240717	0.02208	0.0236	0.02453	0.01859	0.0201	0.02104	0.02179	0.0233	0.02424	-0.0350371	-0.0340378	-0.0288561	-0.0458441	-0.0448349	-0.0396632	-0.0476162	-0.046607	-0.0414353
656.892	0.0705104	0.0855422	0.0889152	0.057008	0.0566113	0.0619504	-0.0135024	-0.0138991	-0.00856002	-0.0285342	-0.0289309	-0.0235918	-0.0319072	-0.0323039	-0.0269648	0.02215	0.02366	0.0246	0.01866	0.02017	0.02111	0.02187	0.02338	0.02431	-0.0356524	-0.0375591	-0.03316	-0.0471942	-0.0491009	-0.0447018	-0.0471389	-0.0490457	-0.0446366
657.856	0.0740804	0.0893412	0.0901068	0.0609278	0.0576314	0.0618754	-0.0131526	-0.016449	-0.0122049	-0.0284134	-0.0317098	-0.0274658	-0.0291791	-0.0324754	-0.0282314	0.02222	0.02372	0.02466	0.01873	0.02023	0.02117	0.02194	0.02344	0.02438	-0.0353726	-0.040169	-0.0368649	-0.0471434	-0.0519398	-0.0486358	-0.0442925	-0.0490889	-0.0457848
658.82	0.0715856	0.0852742	0.0848371	0.0579776	0.0545436	0.0572456	-0.013608	-0.0170419	-0.01434	-0.0272966	-0.0307306	-0.0280286	-0.0268595	-0.0302935	-0.0275915	0.02229	0.02378	0.02471	0.0188	0.0203	0.02123	0.02202	0.02351	0.02444	-0.035898	-0.0408219	-0.03905	-0.0460966	-0.0510306	-0.0492586	-0.0416256	-0.0465495	-0.0447776
659.784	0.0647764	0.0762173	0.075002	0.0511383	0.0487356	0.0500655	-0.0136381	-0.0160407	-0.0147109	-0.025079	-0.0274817	-0.0261518	-0.0238637	-0.0262664	-0.0249365	0.02235	0.02383	0.02476	0.01886	0.02035	0.02128	0.02208	0.02357	0.0245	-0.0359881	-0.0398707	-0.0394709	-0.043939	-0.0478317	-0.0474318	-0.0383521	-0.0422448	-0.041845
660.749	0.0534157	0.0625939	0.0606284	0.0411784	0.0403494	0.0413222	-0.0122373	-0.0130663	-0.0120935	-0.0214155	-0.0222445	-0.0212717	-0.01945	-0.020279	-0.0193063	0.0224	0.02388	0.02481	0.01892	0.0204	0.02133	0.02214	0.02363	0.02455	-0.0346373	-0.0369463	-0.0369035	-0.0403355	-0.0426445	-0.0426017	-0.0341764	-0.0364954	-0.0364426
661.713	0.0401642	0.0471649	0.0446629	0.0297328	0.0308656	0.0316874	-0.0104313	-0.00929852	-0.00847677	-0.0174321	-0.0162993	-0.0154776	-0.0149301	-0.0137973	-0.0129755	0.02245	0.02393	0.02485	0.01898	0.02045	0.02138	0.0222	0.02368	0.0246	-0.0328813	-0.0332285	-0.0333268	-0.0364121	-0.0367493	-0.0368576	-0.0303061	-0.0306533	-0.0307516
662.677	0.027161	0.0324379	0.0296392	0.0184132	0.0216649	0.0220249	-0.00874778	-0.00549616	-0.00513613	-0.0140247	-0.0107731	-0.0104131	-0.011226	-0.00797438	-0.00761435	0.0225	0.02397	0.02489	0.01903	0.0205	0.02142	0.02226	0.02372	0.02464	-0.0312478	-0.0294662	-0.0300261	-0.0330547	-0.0312731	-0.0318331	-0.0278052	-0.0260136	-0.0265735
663.641	0.0157331	0.019597	0.0168227	0.00805816	0.0131901	0.0127456	-0.00767491	-0.00254299	-0.00298742	-0.0115388	-0.00640689	-0.00685131	-0.0087645	-0.00363259	-0.00407701	0.02254	0.024	0.02492	0.01908	0.02054	0.02145	0.02231	0.02377	0.02469	-0.0302149	-0.026543	-0.0279074	-0.0306188	-0.0269469	-0.0283013	-0.0267792	-0.0231073	-0.0244718
664.606	0.00843625	0.0111464	0.00902806	5.46461e-05	0.00670542	0.00432736	-0.0083816	-0.00173083	-0.00410889	-0.0110917	-0.00444097	-0.00681903	-0.00897341	-0.00232264	-0.0047007	0.02258	0.02404	0.02495	0.01912	0.02057	0.02149	0.02235	0.02381	0.02472	-0.0309616	-0.0257708	-0.0290589	-0.0302117	-0.025011	-0.028309	-0.0284728	-0.023282	-0.0265701
665.57	0.00372229	0.00563286	0.00414042	-0.00563102	0.00112801	-0.00256632	-0.00935331	-0.00259428	-0.0062886	-0.0112639	-0.00450486	-0.00819918	-0.00977144	-0.00301241	-0.00670674	0.02262	0.02406	0.02497	0.01916	0.0206	0.02152	0.02239	0.02384	0.02475	-0.0319733	-0.0266543	-0.0312586	-0.0304239	-0.0251049	-0.0297192	-0.0305728	-0.0252638	-0.0298681
666.534	0.00127466	0.00287021	0.00126899	-0.00759598	-0.00482161	-0.00692982	-0.00887064	-0.00609627	-0.00820448	-0.0104662	-0.00769182	-0.00980003	-0.00886496	-0.0060906	-0.00819881	0.02265	0.02409	0.02499	0.01919	0.02063	0.02154	0.02243	0.02387	0.02478	-0.0315206	-0.0301863	-0.0331945	-0.0296562	-0.0283218	-0.03134	-0.0303199	-0.0289856	-0.0320038
667.498	-4.60101e-05	0.00156114	-0.00044416	-0.00876294	-0.00928976	-0.0093112	-0.00871693	-0.00924375	-0.00926519	-0.0103241	-0.0108509	-0.0108723	-0.00831878	-0.0088456	-0.00886704	0.02267	0.0241	0.02501	0.01922	0.02066	0.02156	0.02246	0.0239	0.0248	-0.0313869	-0.0333437	-0.0342752	-0.0295441	-0.0315109	-0.0324323	-0.030258	-0.0322248	-0.0331462
668.462	-0.00179582	0.000160369	-0.00236699	-0.0125168	-0.00982453	-0.00915499	-0.010721	-0.00802871	-0.00735917	-0.0126772	-0.0099849	-0.00931535	-0.0101498	-0.00745754	-0.00678799	0.02269	0.02412	0.02502	0.01925	0.02068	0.02158	0.02249	0.02392	0.02482	-0.033411	-0.0321487	-0.0323792	-0.0319272	-0.0306649	-0.0308954	-0.032916	-0.0316537	-0.0318841
669.427	-0.00304107	-0.000774324	-0.0038601	-0.0160682	-0.0095001	-0.00876615	-0.0130271	-0.00645903	-0.00572508	-0.0152939	-0.00872578	-0.00799183	-0.0122081	-0.00564001	-0.00490605	0.02271	0.02413	0.02503	0.01927	0.02069	0.02159	0.02252	0.02394	0.02484	-0.0357371	-0.030589	-0.0307551	-0.0345639	-0.0294158	-0.0295818	-0.0356388	-0.0304908	-0.0306568
670.391	-0.00306379	-0.00107147	-0.00458	-0.0174119	-0.0110511	-0.0110561	-0.0143481	-0.0079873	-0.00799234	-0.0163405	-0.00997962	-0.00998466	-0.0128319	-0.00647109	-0.00647613	0.02272	0.02414	0.02503	0.01929	0.0207	0.0216	0.02254	0.02395	0.02485	-0.0370681	-0.0321273	-0.0330223	-0.0356305	-0.0306796	-0.0315847	-0.0362517	-0.0313008	-0.0322059
671.355	-0.00277297	-0.00111741	-0.00500679	-0.0175803	-0.0130442	-0.0136501	-0.0148074	-0.0102713	-0.0108771	-0.0164629	-0.0119268	-0.0125327	-0.0125736	-0.00803743	-0.00864329	0.02273	0.02414	0.02503	0.0193	0.02071	0.0216	0.02255	0.02396	0.02485	-0.0375374	-0.0344113	-0.0359071	-0.0357629	-0.0326368	-0.0341327	-0.0358033	-0.0326771	-0.034173
672.319	-0.00291921	-0.00121564	-0.00554857	-0.0166839	-0.0151536	-0.0149427	-0.0137647	-0.0122344	-0.0120235	-0.0154683	-0.0139379	-0.0137271	-0.0111353	-0.00960499	-0.00939418	0.02274	0.02414	0.02503	0.01931	0.02071	0.0216	0.02256	0.02396	0.02486	-0.0365047	-0.0363744	-0.0370535	-0.0347783	-0.0346479	-0.0353271	-0.0343812	-0.0342509	-0.0349401
673.284	-0.00325969	-0.00144317	-0.00607781	-0.0154829	-0.0167918	-0.0155369	-0.0122232	-0.0135321	-0.0122772	-0.0140397	-0.0153486	-0.0140937	-0.00940506	-0.010714	-0.00945908	0.02274	0.02413	0.02502	0.01932	0.02071	0.0216	0.02257	0.02396	0.02485	-0.0349632	-0.0376621	-0.0372972	-0.0333597	-0.0360586	-0.0356937	-0.0327341	-0.035433	-0.0350681
674.248	-0.00388383	-0.00203109	-0.00664184	-0.0148465	-0.0171391	-0.0153414	-0.0109626	-0.0132552	-0.0114576	-0.0128154	-0.015108	-0.0133104	-0.00820464	-0.0104972	-0.00869961	0.02273	0.02412	0.025	0.01932	0.02071	0.02159	0.02257	0.02396	0.02485	-0.0336926	-0.0373752	-0.0364576	-0.0321354	-0.035818	-0.0349004	-0.0316978	-0.0353804	-0.0344728
675.212	-0.0045455	-0.00282066	-0.00712426	-0.0145583	-0.016567	-0.0148327	-0.0100128	-0.0120215	-0.0102872	-0.0117376	-0.0137463	-0.012012	-0.00743403	-0.00944273	-0.00770839	0.02272	0.0241	0.02499	0.01932	0.0207	0.02158	0.02257	0.02395	0.02484	-0.0327328	-0.0361215	-0.0352772	-0.0310576	-0.0344463	-0.033592	-0.0310676	-0.0344563	-0.0336119
676.176	-0.00499238	-0.00382266	-0.00740076	-0.01503	-0.0148069	-0.0146036	-0.0100376	-0.00981456	-0.00961121	-0.0112073	-0.0109843	-0.0107809	-0.00762925	-0.00740619	-0.00720283	0.02271	0.02408	0.02496	0.01931	0.02069	0.02156	0.02257	0.02394	0.02482	-0.0327476	-0.0338946	-0.0345712	-0.0305173	-0.0316743	-0.0323409	-0.0312425	-0.0323894	-0.033066
677.14	-0.00533241	-0.00475965	-0.00754252	-0.0152465	-0.0129597	-0.0142128	-0.00991404	-0.00762731	-0.00888038	-0.0104868	-0.00820007	-0.00945315	-0.00770393	-0.0054172	-0.00667028	0.0227	0.02406	0.02494	0.0193	0.02067	0.02154	0.02256	0.02393	0.0248	-0.032614	-0.0316873	-0.0338204	-0.0297868	-0.0288701	-0.0309931	-0.0312168	-0.0303	-0.0324231
678.105	-0.0055877	-0.00532087	-0.00760277	-0.0139107	-0.0121704	-0.013241	-0.00832301	-0.00658271	-0.00765333	-0.00858984	-0.00684954	-0.00792016	-0.00630794	-0.00456764	-0.00563826	0.02267	0.02403	0.02491	0.01929	0.02065	0.02152	0.02255	0.02391	0.02478	-0.030993	-0.0306127	-0.0325633	-0.0278798	-0.0274995	-0.0294402	-0.029724	-0.0293437	-0.0312843
679.069	-0.00576342	-0.0056171	-0.00751108	-0.0122798	-0.0120376	-0.0122148	-0.00651636	-0.00627417	-0.00645135	-0.00666268	-0.00642049	-0.00659767	-0.00476869	-0.00452651	-0.00470368	0.02265	0.024	0.02487	0.01927	0.02062	0.02149	0.02253	0.02388	0.02475	-0.0291664	-0.0302742	-0.0313213	-0.0259327	-0.0270405	-0.0280877	-0.0279958	-0.0291036	-0.0301508
680.033	-0.00587968	-0.00563561	-0.00709627	-0.0111491	-0.0128106	-0.0116917	-0.00526938	-0.00693087	-0.00581197	-0.00551344	-0.00717494	-0.00605604	-0.00405279	-0.00571429	-0.00459538	0.02262	0.02397	0.02483	0.01925	0.02059	0.02146	0.02251	0.02385	0.02472	-0.0278894	-0.0309009	-0.030642	-0.0247634	-0.0277649	-0.027516	-0.0268244	-0.0298259	-0.029577
680.997	-0.00591382	-0.00543619	-0.00671389	-0.0106064	-0.0136823	-0.011159	-0.0046926	-0.0077685	-0.00524523	-0.00517022	-0.00824613	-0.00572286	-0.00389252	-0.00696843	-0.00444516	0.02259	0.02393	0.02479	0.01922	0.02056	0.02142	0.02248	0.02382	0.02468	-0.0272826	-0.0316985	-0.0300352	-0.0243902	-0.0288061	-0.0271429	-0.0263017	-0.0307176	-0.0290544
681.962	-0.00581315	-0.00501132	-0.00669789	-0.0113263	-0.0137576	-0.0100686	-0.00551319	-0.00794447	-0.00425542	-0.00631502	-0.00874629	-0.00505725	-0.00462845	-0.00705972	-0.00337068	0.02255	0.02388	0.02474	0.01919	0.02052	0.02138	0.02245	0.02378	0.02464	-0.0280632	-0.0318245	-0.0289954	-0.025505	-0.0292663	-0.0264372	-0.0271579	-0.0309191	-0.0280901
682.926	-0.00568784	-0.0045501	-0.00694203	-0.0123444	-0.0135508	-0.00908515	-0.00665653	-0.00786294	-0.00339731	-0.00779427	-0.00900067	-0.00453505	-0.00540234	-0.00660875	-0.00214312	0.02251	0.02384	0.02469	0.01916	0.02048	0.02134	0.02242	0.02374	0.0246	-0.0291665	-0.0317029	-0.0280873	-0.0269543	-0.0294807	-0.025875	-0.0283204	-0.0308468	-0.0272411
683.89	-0.00563784	-0.00420727	-0.00760201	-0.0127834	-0.013181	-0.00849944	-0.00714559	-0.0075432	-0.0028616	-0.00857616	-0.00897377	-0.00429217	-0.00518142	-0.00557903	-0.000897434	0.02246	0.02378	0.02464	0.01912	0.02044	0.02129	0.02238	0.0237	0.02455	-0.0296056	-0.0313232	-0.0275016	-0.0276962	-0.0294138	-0.0255822	-0.0288231	-0.0305408	-0.0267092
684.854	-0.00564119	-0.00407845	-0.00822599	-0.013056	-0.0129386	-0.008886	-0.0074148	-0.00729738	-0.00324481	-0.00897754	-0.00886012	-0.00480755	-0.00482999	-0.00471258	-0.000660007	0.02241	0.02373	0.02458	0.01908	0.02039	0.02124	0.02234	0.02365	0.0245	-0.0298248	-0.0310274	-0.0278248	-0.0280575	-0.0292501	-0.0260476	-0.0290471	-0.0302397	-0.0270371
685.819	-0.00571377	-0.00437551	-0.00836644	-0.0131899	-0.0131719	-0.0113492	-0.00747614	-0.00745814	-0.00563538	-0.0088144	-0.0087964	-0.00697364	-0.00482347	-0.00480548	-0.00298271	0.02236	0.02367	0.02451	0.01903	0.02034	0.02118	0.02229	0.0236	0.02444	-0.0298361	-0.0311281	-0.0301454	-0.0278444	-0.0291364	-0.0281536	-0.0289055	-0.0301975	-0.0292147
686.783	-0.00584192	-0.0049044	-0.00816611	-0.0134619	-0.013825	-0.0145901	-0.00761996	-0.00798308	-0.0087482	-0.00855748	-0.0089206	-0.00968572	-0.00529577	-0.00565889	-0.00642401	0.0223	0.0236	0.02445	0.01898	0.02028	0.02112	0.02224	0.02354	0.02438	-0.02992	-0.0315831	-0.0331982	-0.0275375	-0.0292006	-0.0308057	-0.0287953	-0.0304584	-0.0320635
687.747	-0.00602727	-0.00563274	-0.00743329	-0.014205	-0.0150815	-0.0181969	-0.00817769	-0.00905422	-0.0121697	-0.00857223	-0.00944876	-0.0125642	-0.00677167	-0.0076482	-0.0107636	0.02224	0.02354	0.02437	0.01893	0.02022	0.02106	0.02218	0.02348	0.02432	-0.0304177	-0.0325942	-0.0365397	-0.0275022	-0.0296688	-0.0336242	-0.0290612	-0.0312378	-0.0351932
688.711	-0.0062398	-0.00628735	-0.00672387	-0.015278	-0.0165707	-0.0206135	-0.00903819	-0.0103309	-0.0143737	-0.00899064	-0.0102833	-0.0143262	-0.00855413	-0.00984681	-0.0138897	0.02218	0.02346	0.0243	0.01887	0.02016	0.02099	0.02213	0.02341	0.02425	-0.0312182	-0.0337909	-0.0386737	-0.0278606	-0.0304433	-0.0353162	-0.0297433	-0.032316	-0.0371988
689.676	-0.00650562	-0.006495	-0.00654867	-0.0168128	-0.0181046	-0.0191236	-0.0103071	-0.011599	-0.012618	-0.0103178	-0.0116096	-0.0126286	-0.0102641	-0.0115559	-0.012575	0.02211	0.02339	0.02422	0.01881	0.02009	0.02092	0.02206	0.02334	0.02417	-0.0324171	-0.034989	-0.036838	-0.0291278	-0.0316996	-0.0335486	-0.0311403	-0.0337122	-0.0355612
690.64	-0.006658	-0.00652354	-0.00685113	-0.0183234	-0.0193187	-0.0167961	-0.0116654	-0.0126607	-0.0101381	-0.0117998	-0.0127952	-0.0102725	-0.0114722	-0.0124676	-0.00994493	0.02204	0.02331	0.02414	0.01875	0.02002	0.02085	0.022	0.02327	0.0241	-0.0337054	-0.0359707	-0.0342781	-0.0305498	-0.0328152	-0.0311225	-0.0327105	-0.0349759	-0.0332832
691.604	-0.0064058	-0.00642719	-0.00809022	-0.0193033	-0.0197233	-0.0162942	-0.0128975	-0.0133175	-0.00988845	-0.0128761	-0.0132961	-0.00986706	-0.0112131	-0.0116331	-0.00820403	0.02196	0.02323	0.02405	0.01868	0.01995	0.02077	0.02193	0.02319	0.02402	-0.0348575	-0.0365475	-0.0339385	-0.0315561	-0.0332461	-0.0306371	-0.0340265	-0.0357065	-0.0331075
692.568	-0.00614838	-0.00647356	-0.00923017	-0.0199461	-0.0195057	-0.0161181	-0.0137977	-0.0133573	-0.00996969	-0.0134726	-0.0130321	-0.0096445	-0.0107159	-0.0102755	-0.00688789	0.02188	0.02314	0.02396	0.01861	0.01987	0.02069	0.02185	0.02311	0.02393	-0.0356777	-0.0364973	-0.0339297	-0.0320826	-0.0329021	-0.0303345	-0.0349236	-0.0357431	-0.0331755
693.533	-0.00634486	-0.00723139	-0.00911187	-0.0203214	-0.0183482	-0.0153281	-0.0139766	-0.0120034	-0.00898327	-0.01309	-0.0111168	-0.00809674	-0.0112096	-0.00923635	-0.00621626	0.02179	0.02305	0.02386	0.01853	0.01978	0.0206	0.02177	0.02303	0.02384	-0.0357666	-0.0350534	-0.0328433	-0.03162	-0.0308968	-0.0286967	-0.0349623	-0.0342491	-0.032039
694.497	-0.00652484	-0.00785145	-0.00856422	-0.020294	-0.0172758	-0.0149056	-0.0137691	-0.010751	-0.00838073	-0.0124425	-0.00942438	-0.00705413	-0.0117298	-0.00871161	-0.00634135	0.0217	0.02295	0.02376	0.01845	0.0197	0.02051	0.02169	0.02294	0.02375	-0.0354691	-0.033701	-0.0321407	-0.0308925	-0.0291244	-0.0275641	-0.0345888	-0.0328206	-0.0312603
695.461	-0.00626926	-0.00746428	-0.00798576	-0.0196473	-0.0175887	-0.0160341	-0.0133781	-0.0113194	-0.00976482	-0.0121831	-0.0101244	-0.00856979	-0.0116616	-0.00960294	-0.00804831	0.02161	0.02285	0.02366	0.01837	0.01961	0.02042	0.02161	0.02285	0.02366	-0.0349881	-0.0341694	-0.0334248	-0.0305531	-0.0297344	-0.0289898	-0.0341546	-0.033336	-0.0325914
696.425	-0.00588319	-0.00669937	-0.00750845	-0.0186945	-0.0181433	-0.0171666	-0.0128113	-0.0122602	-0.0112834	-0.0119951	-0.011444	-0.0104672	-0.0111861	-0.0106349	-0.00965812	0.02151	0.02275	0.02355	0.01828	0.01951	0.02032	0.02152	0.02275	0.02356	-0.0343213	-0.0350102	-0.0348334	-0.0302751	-0.030954	-0.0307872	-0.0334835	-0.0341623	-0.0339955
697.389	-0.00549821	-0.0058273	-0.00753736	-0.0174452	-0.018029	-0.0168041	-0.011947	-0.0125308	-0.0113059	-0.0116179	-0.0122017	-0.0109768	-0.00990784	-0.0104917	-0.00926672	0.02141	0.02264	0.02344	0.01819	0.01942	0.02022	0.02142	0.02265	0.02345	-0.033357	-0.0351708	-0.0347459	-0.0298079	-0.0316217	-0.0311968	-0.0322556	-0.0340694	-0.0336445
698.354	-0.00521579	-0.00505532	-0.00765173	-0.016593	-0.0178477	-0.015986	-0.0113772	-0.0126319	-0.0107703	-0.0115377	-0.0127924	-0.0109307	-0.0089413	-0.010196	-0.00833432	0.02131	0.02253	0.02333	0.01809	0.01932	0.02011	0.02133	0.02255	0.02335	-0.0326872	-0.0351619	-0.0341003	-0.0296277	-0.0321124	-0.0310407	-0.0313022	-0.0337769	-0.0327152
699.318	-0.00523354	-0.00476318	-0.00762488	-0.0169567	-0.0177862	-0.0149332	-0.0117232	-0.0125527	-0.0096997	-0.0121935	-0.013023	-0.0101701	-0.00933183	-0.0101613	-0.00730837	0.0212	0.02242	0.02321	0.018	0.01921	0.02	0.02123	0.02244	0.02323	-0.0329232	-0.0349727	-0.0329097	-0.0301935	-0.032233	-0.0301701	-0.0313549	-0.0333944	-0.0313314
700.282	-0.00539462	-0.00470406	-0.00727968	-0.0181708	-0.0181795	-0.0146028	-0.0127761	-0.0127849	-0.00920822	-0.0134667	-0.0134754	-0.00989877	-0.0108911	-0.0108998	-0.00732315	0.02109	0.0223	0.02309	0.0179	0.0191	0.01989	0.02112	0.02233	0.02312	-0.0338661	-0.0350849	-0.0322982	-0.0313667	-0.0325754	-0.0297888	-0.0322722	-0.033491	-0.0307043
701.246	-0.00571769	-0.00491348	-0.00604906	-0.0210112	-0.0201878	-0.0168439	-0.0152935	-0.0144701	-0.0111262	-0.0160977	-0.0152743	-0.0119304	-0.0149621	-0.0141387	-0.0107948	0.02098	0.02218	0.02296	0.01779	0.01899	0.01978	0.02101	0.02222	0.023	-0.0362735	-0.0366501	-0.0340862	-0.0338877	-0.0342643	-0.0317104	-0.0351511	-0.0355377	-0.0329737
702.211	-0.00587373	-0.0049242	-0.00487626	-0.0228722	-0.0215224	-0.0192016	-0.0169985	-0.0156487	-0.0133279	-0.017948	-0.0165982	-0.0142774	-0.0179959	-0.0166462	-0.0143253	0.02086	0.02206	0.02284	0.01768	0.01888	0.01966	0.0209	0.0221	0.02288	-0.0378585	-0.0377087	-0.0361679	-0.035628	-0.0354782	-0.0339374	-0.0370583	-0.0369086	-0.0353677
703.175	-0.00530089	-0.0038979	-0.00464829	-0.0200897	-0.0194046	-0.0194364	-0.0147888	-0.0141037	-0.0141355	-0.0161918	-0.0155067	-0.0155385	-0.0154414	-0.0147563	-0.0147881	0.02074	0.02193	0.0227	0.01757	0.01876	0.01954	0.02079	0.02198	0.02275	-0.0355288	-0.0360337	-0.0368355	-0.0337618	-0.0342667	-0.0350785	-0.0339233	-0.0344281	-0.03523
704.139	-0.00471629	-0.00298341	-0.00496679	-0.0166146	-0.0164646	-0.0187519	-0.0118983	-0.0117483	-0.0140356	-0.0136312	-0.0134812	-0.0157685	-0.0116478	-0.0114978	-0.0137851	0.02061	0.0218	0.02257	0.01746	0.01864	0.01941	0.02067	0.02185	0.02262	-0.0325083	-0.0335483	-0.0366056	-0.0310912	-0.0321212	-0.0351785	-0.0302357	-0.0312658	-0.034323
705.103	-0.00487538	-0.00356331	-0.00610267	-0.0162016	-0.0147047	-0.0177408	-0.0113262	-0.00982936	-0.0128654	-0.0126383	-0.0111414	-0.0141775	-0.010099	-0.00860207	-0.0116381	0.02048	0.02166	0.02243	0.01734	0.01851	0.01928	0.02055	0.02172	0.02249	-0.0318062	-0.0314894	-0.0352954	-0.0299783	-0.0296514	-0.0334575	-0.0303556	-0.0300288	-0.0338348
706.067	-0.00510126	-0.00409803	-0.00693514	-0.0157752	-0.0132311	-0.0159963	-0.0106739	-0.00812981	-0.010895	-0.0116771	-0.00913304	-0.0118982	-0.00884003	-0.00629593	-0.00906112	0.02035	0.02152	0.02229	0.01721	0.01839	0.01915	0.02042	0.02159	0.02236	-0.0310239	-0.0296498	-0.033185	-0.0288871	-0.027523	-0.0310482	-0.0306519	-0.0292778	-0.032813
707.032	-0.00499296	-0.00314589	-0.00620656	-0.0129009	-0.0118983	-0.0130826	-0.00790791	-0.00690537	-0.00808968	-0.00975499	-0.00875244	-0.00993676	-0.00669432	-0.00569177	-0.00687609	0.02021	0.02138	0.02214	0.01709	0.01825	0.01901	0.02029	0.02146	0.02222	-0.0281179	-0.0282854	-0.0302297	-0.026845	-0.0270024	-0.0289468	-0.0282289	-0.0283964	-0.0303407
707.996	-0.00447805	-0.00179589	-0.0045985	-0.00940968	-0.0104628	-0.00967906	-0.00493162	-0.00598477	-0.00520101	-0.00761379	-0.00866693	-0.00788317	-0.00481118	-0.00586433	-0.00508057	0.02007	0.02123	0.02199	0.01696	0.01812	0.01887	0.02016	0.02132	0.02207	-0.0250016	-0.0272148	-0.027191	-0.0245738	-0.0267869	-0.0267532	-0.0252899	-0.0275031	-0.0274693
708.96	-0.00321676	-0.00068225	-0.00220413	-0.0063064	-0.00856972	-0.00617923	-0.00308964	-0.00535296	-0.00296247	-0.00562415	-0.00788747	-0.00549698	-0.00410227	-0.00636559	-0.0039751	0.01993	0.02109	0.02184	0.01683	0.01798	0.01873	0.02002	0.02118	0.02193	-0.0230196	-0.026443	-0.0248025	-0.0224541	-0.0258675	-0.024227	-0.0231205	-0.0265438	-0.0249034
709.924	-0.00161015	0.000272258	0.000468954	-0.003635	-0.00640727	-0.00300388	-0.00202485	-0.00479712	-0.00139373	-0.00390726	-0.00667953	-0.00327613	-0.00410396	-0.00687622	-0.00347283	0.01979	0.02093	0.02168	0.01669	0.01784	0.01859	0.01988	0.02103	0.02178	-0.0218149	-0.0257271	-0.0230737	-0.0205973	-0.0245195	-0.0218661	-0.0215474	-0.0254696	-0.0228162
710.889	0.000157563	0.000845318	0.0029565	-0.0018521	-0.00391471	-0.000728522	-0.00200966	-0.00407228	-0.000886086	-0.00269741	-0.00476003	-0.00157384	-0.0048086	-0.00687122	-0.00368503	0.01964	0.02078	0.02152	0.01655	0.0177	0.01844	0.01974	0.02088	0.02162	-0.0216497	-0.0248523	-0.0224061	-0.0192474	-0.02246	-0.0200138	-0.0209856	-0.0241883	-0.0217421
711.853	0.00177561	0.00130131	0.00503535	-0.000724628	-0.00148432	0.000717528	-0.00250024	-0.00325993	-0.00105808	-0.00202593	-0.00278562	-0.000583778	-0.00575998	-0.00651967	-0.00431782	0.01948	0.02062	0.02136	0.01641	0.01755	0.01828	0.01959	0.02073	0.02147	-0.0219802	-0.0238799	-0.0224181	-0.0184359	-0.0203356	-0.0188638	-0.0209253	-0.022825	-0.0213631
712.817	0.00284041	0.00184357	0.00628258	-0.000152017	0.000616888	0.00103133	-0.00299243	-0.00222352	-0.00180908	-0.00199558	-0.00122668	-0.000812235	-0.00643459	-0.00566569	-0.00525125	0.01933	0.02046	0.02119	0.01627	0.0174	0.01813	0.01944	0.02057	0.02131	-0.0223224	-0.0226835	-0.0229991	-0.0182656	-0.0186267	-0.0189422	-0.0209912	-0.0213523	-0.0216779
713.781	0.0034462	0.00243289	0.00683314	-0.000193472	0.00207395	0.000758298	-0.00363967	-0.00137225	-0.0026879	-0.00262636	-0.000358934	-0.00167459	-0.00702662	-0.00475919	-0.00607485	0.01917	0.02029	0.02102	0.01612	0.01724	0.01797	0.01929	0.02041	0.02114	-0.0228097	-0.0216622	-0.0237079	-0.0187464	-0.0175989	-0.0196446	-0.0212537	-0.0201063	-0.0221519
714.746	0.00350089	0.00317953	0.0066526	-0.0010745	0.00239819	0.000315123	-0.0045754	-0.0011027	-0.00318577	-0.00425404	-0.00078134	-0.00286441	-0.00772711	-0.00425441	-0.00633748	0.019	0.02012	0.02085	0.01597	0.01709	0.01781	0.01913	0.02025	0.02098	-0.0235754	-0.0212227	-0.0240358	-0.020224	-0.0178713	-0.0206744	-0.0217607	-0.019408	-0.0222211
715.71	0.00315987	0.00383845	0.00582623	-0.00219562	0.00184379	-0.00021498	-0.00535549	-0.00131608	-0.00337485	-0.00603407	-0.00199466	-0.00405343	-0.00802185	-0.00398244	-0.00604121	0.01884	0.01995	0.02067	0.01581	0.01693	0.01765	0.01897	0.02009	0.02081	-0.0241955	-0.0212661	-0.0240449	-0.0218441	-0.0189247	-0.0217034	-0.0221734	-0.019254	-0.0220327
716.674	0.00242928	0.00408296	0.00409935	-0.00313988	0.000274563	-0.00067247	-0.00556916	-0.00215471	-0.00310175	-0.00722284	-0.0038084	-0.00475543	-0.00723924	-0.00382479	-0.00477183	0.01867	0.01978	0.02049	0.01566	0.01676	0.01748	0.01881	0.01992	0.02063	-0.0242392	-0.0219347	-0.0235917	-0.0228828	-0.0205684	-0.0222354	-0.0220933	-0.0197889	-0.0214459
717.638	0.00166476	0.00426822	0.00245731	-0.00358513	-0.00162707	-0.000869644	-0.00524989	-0.00329183	-0.00253441	-0.00785335	-0.00589529	-0.00513787	-0.00604244	-0.00408438	-0.00332695	0.0185	0.0196	0.02031	0.0155	0.0166	0.01731	0.01865	0.01975	0.02046	-0.0237499	-0.0228918	-0.0228444	-0.0233534	-0.0224953	-0.0224479	-0.0217267	-0.0208687	-0.0208212
718.602	0.00104739	0.00455569	0.00158529	-0.00277869	-0.00335746	-0.000602833	-0.00382607	-0.00440485	-0.00165022	-0.00733437	-0.00791315	-0.00515852	-0.00436397	-0.00494275	-0.00218812	0.01832	0.01942	0.02012	0.01533	0.01643	0.01713	0.01848	0.01957	0.02028	-0.0221461	-0.0238249	-0.0217702	-0.0226644	-0.0243432	-0.0222885	-0.0207473	-0.022416	-0.0203714
719.567	0.00110707	0.00519979	0.00212903	-0.00159511	-0.00451651	0.000239603	-0.00270218	-0.00562358	-0.00086747	-0.0067949	-0.0097163	-0.00496019	-0.00372414	-0.00664553	-0.00188942	0.01814	0.01923	0.01993	0.01517	0.01626	0.01696	0.01831	0.01939	0.0201	-0.0208422	-0.0248536	-0.0207975	-0.0219649	-0.0259763	-0.0219202	-0.0203335	-0.0243349	-0.0202888
720.531	0.00254657	0.00644893	0.00532064	-0.000929569	-0.00455324	0.00202983	-0.00347613	-0.0070998	-0.000516733	-0.0073785	-0.0110022	-0.0044191	-0.0062502	-0.00987387	-0.0032908	0.01796	0.01905	0.01974	0.015	0.01608	0.01678	0.01813	0.01921	0.01991	-0.0214361	-0.0261498	-0.0202567	-0.0223785	-0.0270822	-0.0211991	-0.0220151	-0.0267187	-0.0208357
721.495	0.00502842	0.00848269	0.0100862	3.24537e-05	-0.00341659	0.00418994	-0.00499596	-0.00844501	-0.000838481	-0.00845024	-0.0118993	-0.00429275	-0.0100538	-0.0135028	-0.00589629	0.01778	0.01886	0.01955	0.01483	0.0159	0.0166	0.01795	0.01903	0.01972	-0.022776	-0.027305	-0.0203885	-0.0232802	-0.0277993	-0.0208928	-0.0243728	-0.0289018	-0.0219853
722.46	0.00869721	0.0117335	0.0161193	0.00181165	-0.000660568	0.00617588	-0.00688556	-0.00935778	-0.00252133	-0.00992185	-0.0123941	-0.00555761	-0.0143077	-0.0167799	-0.00994345	0.01759	0.01866	0.01935	0.01465	0.01572	0.01641	0.01777	0.01884	0.01953	-0.0244756	-0.0280178	-0.0218713	-0.0245718	-0.0281141	-0.0219676	-0.0267193	-0.0302616	-0.0241151
723.424	0.0128096	0.0156913	0.0223498	0.00439433	0.00308096	0.00825819	-0.00841529	-0.00972866	-0.00455143	-0.0112969	-0.0126103	-0.00743309	-0.0179554	-0.0192688	-0.0140916	0.0174	0.01847	0.01915	0.01447	0.01554	0.01622	0.01759	0.01866	0.01934	-0.0258153	-0.0281987	-0.0237014	-0.0257669	-0.0281503	-0.0236531	-0.0283689	-0.0307523	-0.026255
724.388	0.0168923	0.0203344	0.027794	0.0081516	0.00753361	0.0103086	-0.00874073	-0.00935872	-0.00658376	-0.0121828	-0.0128008	-0.0100259	-0.0196424	-0.0202604	-0.0174855	0.01721	0.01827	0.01895	0.01429	0.01536	0.01603	0.0174	0.01846	0.01914	-0.0259507	-0.0276287	-0.0255338	-0.0264728	-0.0281608	-0.0260559	-0.028338	-0.030016	-0.027921
725.352	0.0202799	0.0246299	0.0318855	0.0124497	0.0120649	0.0129794	-0.00783019	-0.00821497	-0.0073005	-0.0121802	-0.012565	-0.0116505	-0.0194358	-0.0198205	-0.0189061	0.01701	0.01807	0.01874	0.01411	0.01517	0.01584	0.01721	0.01827	0.01894	-0.0248402	-0.026285	-0.0260405	-0.0262902	-0.027735	-0.0274905	-0.026812	-0.0282568	-0.0280124
726.316	0.0220944	0.0278131	0.0337124	0.0166887	0.0156708	0.0170957	-0.00540575	-0.00642358	-0.00499872	-0.0111244	-0.0121423	-0.0107174	-0.0170238	-0.0180416	-0.0166167	0.01682	0.01787	0.01853	0.01393	0.01498	0.01564	0.01702	0.01807	0.01874	-0.0222258	-0.0242936	-0.0235287	-0.0250544	-0.0271223	-0.0263574	-0.023729	-0.0257968	-0.025042
727.281	0.0225003	0.0290574	0.0333263	0.0211384	0.0191921	0.0220114	-0.00136183	-0.00330819	-0.000488911	-0.00791898	-0.00986535	-0.00704607	-0.0121879	-0.0141342	-0.011315	0.01661	0.01766	0.01832	0.01374	0.01478	0.01545	0.01683	0.01787	0.01853	-0.0179718	-0.0209682	-0.0188089	-0.021659	-0.0246453	-0.0224961	-0.0188276	-0.021814	-0.0196547
728.245	0.0209987	0.02626	0.0297957	0.0259272	0.0229973	0.0276431	0.0049285	0.00199865	0.00664445	-0.000332841	-0.00326269	0.00138311	-0.00386856	-0.00679841	-0.00215261	0.01641	0.01745	0.01811	0.01355	0.01459	0.01524	0.01663	0.01767	0.01833	-0.0114815	-0.0154514	-0.0114656	-0.0138828	-0.0178527	-0.0138569	-0.0110627	-0.0150325	-0.0110467
729.209	0.0187015	0.0224858	0.0251574	0.0308806	0.0274989	0.0331277	0.0121791	0.00879747	0.0144262	0.00839484	0.00501316	0.0106419	0.00572318	0.0023415	0.00797024	0.0162	0.01724	0.01789	0.01335	0.01439	0.01504	0.01643	0.01746	0.01812	-0.00402085	-0.00844253	-0.0034638	-0.00495516	-0.00937684	-0.0043981	-0.00270433	-0.00711601	-0.00214727
730.173	0.0159435	0.0198726	0.0202676	0.0353979	0.0331936	0.0367789	0.0194544	0.0172502	0.0208354	0.0155253	0.013321	0.0169063	0.0151303	0.012926	0.0165113	0.016	0.01703	0.01767	0.01316	0.01419	0.01484	0.01622	0.01726	0.0179	0.00345445	0.000220173	0.00316543	0.00236531	-0.000868958	0.0020663	0.00423893	0.000994661	0.00393992
731.138	0.0145569	0.0190985	0.0177367	0.040887	0.0401969	0.0409819	0.0263301	0.0256401	0.026425	0.0217884	0.0210984	0.0218834	0.0231502	0.0224602	0.0232452	0.01578	0.01681	0.01745	0.01296	0.01398	0.01463	0.01602	0.01704	0.01769	0.0105501	0.00883005	0.008975	0.00882844	0.00711843	0.00725338	0.0100576	0.00834755	0.00848249
732.102	0.0166677	0.0216243	0.0211804	0.049302	0.0493998	0.0482259	0.0326343	0.0327321	0.0315582	0.0276778	0.0277755	0.0266017	0.0281217	0.0282194	0.0270456	0.01557	0.01659	0.01723	0.01276	0.01378	0.01442	0.01581	0.01683	0.01747	0.0170643	0.0161421	0.0143282	0.0149178	0.0139955	0.0121817	0.0148759	0.0139537	0.0121398
733.066	0.0217296	0.0272397	0.0284395	0.0584032	0.0589727	0.0565124	0.0366736	0.0372432	0.0347829	0.0311635	0.031733	0.0292727	0.0299636	0.0305332	0.0280729	0.01535	0.01637	0.017	0.01256	0.01357	0.0142	0.0156	0.01662	0.01725	0.0213236	0.0208732	0.0177829	0.0186035	0.018163	0.0150727	0.0172839	0.0168335	0.0137432
734.03	0.0303837	0.0367798	0.0390205	0.0663652	0.0670668	0.0644109	0.0359815	0.0366831	0.0340272	0.0295854	0.030287	0.0276311	0.0273447	0.0280463	0.0253904	0.01513	0.01615	0.01677	0.01235	0.01336	0.01399	0.01539	0.0164	0.01703	0.0208515	0.0205331	0.0172572	0.0172354	0.016927	0.0136411	0.015145	0.0148366	0.0115506
734.995	0.0411931	0.0485698	0.0515432	0.0738981	0.0746315	0.0727065	0.0327049	0.0334383	0.0315134	0.0253282	0.0260617	0.0241367	0.0223549	0.0230883	0.0211633	0.01491	0.01592	0.01654	0.01214	0.01315	0.01377	0.01517	0.01618	0.0168	0.0177949	0.0175183	0.0149734	0.0131882	0.0129117	0.0103667	0.0107831	0.0105065	0.00796151
735.959	0.0531754	0.0614391	0.0642821	0.0807902	0.0816691	0.0815955	0.0276148	0.0284937	0.0284201	0.0193511	0.02023	0.0201564	0.0165081	0.017387	0.0173134	0.01469	0.01569	0.01631	0.01193	0.01293	0.01355	0.01496	0.01596	0.01657	0.0129248	0.0128037	0.0121101	0.00742112	0.00730002	0.00660639	0.00535582	0.00523472	0.0045511
736.923	0.0656083	0.0747102	0.0777799	0.0879809	0.0891719	0.0914148	0.0223726	0.0235636	0.0258065	0.0132707	0.0144616	0.0167046	0.010201	0.0113919	0.0136349	0.01446	0.01546	0.01607	0.01172	0.01272	0.01333	0.01474	0.01573	0.01634	0.00791262	0.00810357	0.00973654	0.00155069	0.00174164	0.00337461	0.000155174	0.000356123	0.00198909
737.887	0.0769729	0.0866364	0.0910805	0.0966486	0.0985161	0.103307	0.0196757	0.0215432	0.0263336	0.0100122	0.0118796	0.0166701	0.00556814	0.00743556	0.012226	0.01424	0.01523	0.01583	0.01151	0.0125	0.0131	0.01451	0.0155	0.01611	0.00543574	0.00631316	0.0105036	-0.00149779	-0.000620369	0.00357009	-0.00209703	-0.00121961	0.00296085
738.851	0.0886772	0.0992556	0.106956	0.105865	0.108552	0.115052	0.0171876	0.0198748	0.0263748	0.00660911	0.00929633	0.0157963	-0.00109103	0.00159619	0.00809618	0.01401	0.01499	0.01559	0.01129	0.01228	0.01288	0.01429	0.01527	0.01588	0.00317756	0.00488478	0.0107848	-0.00468089	-0.00298367	0.00291632	-0.0045929	-0.00288569	0.0030043
739.816	0.100216	0.113248	0.127133	0.114919	0.118811	0.124541	0.014703	0.018595	0.0243247	0.00167137	0.00556343	0.0112931	-0.0122144	-0.00832234	-0.00259268	0.01377	0.01476	0.01535	0.01107	0.01205	0.01265	0.01406	0.01504	0.01564	0.000932989	0.00383505	0.00897472	-0.00939863	-0.00648657	-0.0013569	-0.00888667	-0.00597461	-0.000844945
740.78	0.115809	0.13094	0.15379	0.124335	0.128626	0.132589	0.00852518	0.0128161	0.01678	-0.00660501	-0.00231407	0.00164981	-0.0294555	-0.0251646	-0.0212007	0.01354	0.01452	0.01511	0.01085	0.01183	0.01242	0.01383	0.01481	0.0154	-0.00501482	-0.00170388	0.00167	-0.017455	-0.0141441	-0.0107702	-0.0170599	-0.013749	-0.0103751
741.744	0.142527	0.15755	0.193276	0.135513	0.137515	0.13924	-0.00701359	-0.0050117	-0.0032865	-0.0220362	-0.0200343	-0.0183091	-0.0577628	-0.0557609	-0.0540357	0.0133	0.01428	0.01486	0.01063	0.0116	0.01219	0.0136	0.01457	0.01516	-0.0203136	-0.0192917	-0.0181465	-0.0326662	-0.0316343	-0.0304991	-0.0338501	-0.0328182	-0.031683
742.708	0.171314	0.185084	0.234798	0.145108	0.144448	0.144704	-0.026206	-0.0268664	-0.0266102	-0.039976	-0.0406364	-0.0403802	-0.08969	-0.0903503	-0.0900941	0.01306	0.01403	0.01461	0.01041	0.01137	0.01195	0.01337	0.01434	0.01492	-0.039266	-0.0408964	-0.0412202	-0.050386	-0.0520064	-0.0523302	-0.0528336	-0.0544639	-0.0547877
743.673	0.196707	0.208545	0.271855	0.149719	0.148027	0.149738	-0.0469885	-0.0486801	-0.0469696	-0.0588262	-0.0605178	-0.0588073	-0.122136	-0.123828	-0.122117	0.01282	0.01379	0.01436	0.01018	0.01114	0.01172	0.01313	0.0141	0.01467	-0.0598085	-0.0624701	-0.0613296	-0.0690062	-0.0716578	-0.0705273	-0.0707588	-0.0734205	-0.0722799
744.637	0.215007	0.224168	0.297923	0.150909	0.148867	0.152744	-0.0640979	-0.0661399	-0.0622633	-0.0732587	-0.0753007	-0.071424	-0.147014	-0.149056	-0.14518	0.01258	0.01354	0.01411	0.00995	0.01091	0.01148	0.0129	0.01386	0.01442	-0.0766779	-0.0796799	-0.0763733	-0.0832087	-0.0862107	-0.082904	-0.0828353	-0.0858373	-0.0825207
745.601	0.220227	0.225834	0.303189	0.148875	0.146936	0.152227	-0.0713519	-0.0732916	-0.0680005	-0.0769588	-0.0788985	-0.0736074	-0.154314	-0.156253	-0.150962	0.01234	0.01329	0.01385	0.00972	0.01068	0.01124	0.01266	0.01361	0.01418	-0.0836919	-0.0865816	-0.0818505	-0.0866788	-0.0895785	-0.0848474	-0.0821671	-0.0850568	-0.0803357
746.565	0.213765	0.215608	0.291025	0.144321	0.142775	0.148638	-0.0694441	-0.0709899	-0.0651272	-0.0712877	-0.0728335	-0.0669708	-0.146705	-0.14825	-0.142388	0.01209	0.01304	0.0136	0.00949	0.01044	0.011	0.01242	0.01337	0.01393	-0.0815341	-0.0840299	-0.0787272	-0.0807777	-0.0832735	-0.0779708	-0.0717168	-0.0742126	-0.0689099
747.529	0.193317	0.191671	0.258753	0.137737	0.136609	0.141299	-0.0555799	-0.0567081	-0.0520177	-0.0539342	-0.0550624	-0.050372	-0.121016	-0.122145	-0.117454	0.01184	0.01279	0.01334	0.00926	0.0102	0.01075	0.01217	0.01312	0.01367	-0.0674199	-0.0694981	-0.0653577	-0.0631942	-0.0652624	-0.061122	-0.0503629	-0.0524411	-0.0483007
748.494	0.163992	0.159551	0.214716	0.12995	0.129357	0.132098	-0.0340415	-0.0346353	-0.0318943	-0.0296006	-0.0301944	-0.0274534	-0.0847652	-0.085359	-0.082618	0.01159	0.01254	0.01308	0.00902	0.00996	0.01051	0.01193	0.01287	0.01342	-0.0456315	-0.0471753	-0.0449743	-0.0386206	-0.0401544	-0.0379634	-0.0234434	-0.0249772	-0.0227862
749.458	0.128152	0.122237	0.163652	0.121595	0.121636	0.122004	-0.0065571	-0.0065158	-0.00614835	-0.000641569	-0.000600272	-0.000232824	-0.0420567	-0.0420154	-0.0416479	0.01134	0.01228	0.01282	0.00878	0.00972	0.01026	0.01168	0.01262	0.01316	-0.0178971	-0.0187958	-0.0189684	-0.00942157	-0.0103203	-0.0104928	0.00539683	0.00449812	0.00432557
750.422	0.0917369	0.0855326	0.113694	0.113742	0.114581	0.11309	0.022005	0.0228439	0.0213535	0.0282093	0.0290482	0.0275579	4.80623e-05	0.000886982	-0.000603362	0.01109	0.01202	0.01256	0.00855	0.00948	0.01002	0.01144	0.01237	0.01291	0.010915	0.0108239	0.00879355	0.0196593	0.0195682	0.0175379	0.0322883	0.0321972	0.0301668
751.386	0.0608888	0.0558818	0.0744189	0.107222	0.109245	0.107823	0.0463334	0.0483564	0.046934	0.0513404	0.0533633	0.0519409	0.0328033	0.0348263	0.0334038	0.01083	0.01176	0.01229	0.00831	0.00924	0.00977	0.01119	0.01212	0.01265	0.0355034	0.0365964	0.034644	0.0430304	0.0441233	0.0421709	0.0515137	0.0526067	0.0506542
752.351	0.0373625	0.0343608	0.0462341	0.103391	0.106483	0.105997	0.0660284	0.0691208	0.0686342	0.0690301	0.0721225	0.071636	0.0571568	0.0602492	0.0597626	0.01058	0.0115	0.01203	0.00806	0.00899	0.00952	0.01094	0.01186	0.01239	0.0554484	0.0576208	0.0566042	0.0609701	0.0631325	0.062116	0.0650614	0.0672338	0.0662173
753.315	0.0264992	0.025712	0.0346843	0.104025	0.107658	0.108789	0.0775258	0.0811591	0.0822902	0.078313	0.0819463	0.0830774	0.0693407	0.072974	0.0741052	0.01032	0.01124	0.01176	0.00782	0.00874	0.00926	0.01068	0.01161	0.01212	0.0672058	0.0699191	0.0705302	0.070493	0.0732063	0.0738174	0.0718475	0.0745508	0.075172
754.279	0.023683	0.0253798	0.0339341	0.108689	0.112298	0.114524	0.0850063	0.088615	0.0908411	0.0833095	0.0869182	0.0891443	0.0747552	0.0783639	0.0805901	0.01006	0.01098	0.01149	0.00758	0.0085	0.00901	0.01043	0.01135	0.01186	0.0749463	0.077635	0.0793511	0.0757295	0.0784182	0.0801343	0.0753907	0.0780794	0.0797955
755.243	0.0260722	0.0304992	0.0397471	0.117696	0.120352	0.121374	0.0916243	0.0942801	0.0953016	0.0871973	0.089853	0.0908745	0.0779494	0.0806051	0.0816267	0.0098	0.01072	0.01122	0.00733	0.00825	0.00875	0.01017	0.01109	0.0116	0.0818243	0.0835601	0.0840816	0.0798673	0.081603	0.0821245	0.0792587	0.0809944	0.0815059
756.208	0.0336859	0.040741	0.0528716	0.130579	0.131918	0.130967	0.0968934	0.0982324	0.0972807	0.0898382	0.0911773	0.0902255	0.0777076	0.0790467	0.078095	0.00954	0.01045	0.01095	0.00709	0.008	0.0085	0.00992	0.01083	0.01133	0.0873534	0.0877824	0.0863307	0.0827482	0.0831773	0.0817255	0.0823096	0.0827386	0.0812869
757.172	0.0459613	0.0551806	0.0734334	0.147407	0.147216	0.144545	0.101445	0.101255	0.098584	0.0922261	0.0920357	0.0893647	0.0739732	0.0737829	0.0711119	0.00927	0.01018	0.01068	0.00684	0.00775	0.00824	0.00966	0.01057	0.01106	0.0921753	0.091075	0.087904	0.0853861	0.0842857	0.0811247	0.0844279	0.0833276	0.0801666
758.136	0.0618031	0.0727396	0.0990641	0.166882	0.165828	0.16144	0.105079	0.104025	0.0996365	0.094142	0.0930886	0.0887	0.0678176	0.0667642	0.0623755	0.00901	0.00991	0.0104	0.00659	0.00749	0.00798	0.0094	0.0103	0.01079	0.0960686	0.0941151	0.0892365	0.087552	0.0855986	0.08072	0.0861917	0.0842383	0.0793597
759.1	0.0811332	0.093259	0.129231	0.18814	0.1882	0.181963	0.107007	0.107067	0.10083	0.0948812	0.0949408	0.0887039	0.0589087	0.0589684	0.0527314	0.00874	0.00965	0.01013	0.00634	0.00724	0.00772	0.00914	0.01004	0.01052	0.098267	0.0974166	0.0906997	0.0885412	0.0877008	0.0809839	0.0872747	0.0864343	0.0797174
760.065	0.100337	0.113057	0.158553	0.209953	0.21196	0.204408	0.109616	0.111623	0.104071	0.0968954	0.0989029	0.0913507	0.0513995	0.0534069	0.0458547	0.00848	0.00938	0.00985	0.00609	0.00698	0.00746	0.00888	0.00977	0.01025	0.101136	0.102243	0.0942209	0.0908054	0.0919229	0.0838907	0.0902838	0.0914013	0.083369
761.029	0.116595	0.129256	0.182731	0.231299	0.235666	0.227972	0.114704	0.11907	0.111376	0.102043	0.10641	0.0987154	0.0485684	0.0529348	0.0452406	0.00821	0.0091	0.00958	0.00583	0.00673	0.0072	0.00861	0.00951	0.00998	0.106494	0.10997	0.101796	0.0962132	0.0996795	0.0915154	0.0975628	0.101029	0.0928651
761.993	0.127445	0.139288	0.197981	0.250688	0.256981	0.250257	0.123242	0.129535	0.122811	0.1114	0.117693	0.110969	0.0527062	0.0589994	0.0522755	0.00794	0.00883	0.0093	0.00558	0.00647	0.00694	0.00835	0.00924	0.00971	0.115302	0.120705	0.113511	0.10582	0.111223	0.104029	0.109585	0.114988	0.107794
762.957	0.128964	0.139065	0.198412	0.266972	0.27348	0.269469	0.138008	0.144516	0.140505	0.127907	0.134415	0.130404	0.0685595	0.0750676	0.0710567	0.00767	0.00856	0.00902	0.00533	0.00621	0.00667	0.00808	0.00897	0.00943	0.130338	0.135956	0.131485	0.122577	0.128205	0.123734	0.12921	0.134828	0.130357
763.922	0.122713	0.130266	0.186051	0.278091	0.283987	0.282998	0.155377	0.161274	0.160284	0.147825	0.153721	0.152732	0.0920398	0.0979362	0.0969469	0.0074	0.00828	0.00874	0.00507	0.00595	0.00641	0.00782	0.0087	0.00916	0.147977	0.152994	0.151544	0.142755	0.147771	0.146322	0.151708	0.156724	0.155275
764.886	0.107647	0.111354	0.15782	0.282697	0.287951	0.288644	0.17505	0.180304	0.180996	0.171343	0.176597	0.17729	0.124878	0.130132	0.130824	0.00713	0.00801	0.00846	0.00481	0.0057	0.00614	0.00755	0.00843	0.00888	0.16792	0.172294	0.172536	0.166533	0.170897	0.17115	0.176118	0.180493	0.180735
765.85	0.0876722	0.0878832	0.123143	0.277506	0.281075	0.283384	0.189834	0.193403	0.195712	0.189623	0.193192	0.195501	0.154363	0.157932	0.160241	0.00685	0.00773	0.00817	0.00456	0.00544	0.00588	0.00728	0.00816	0.0086	0.182984	0.185673	0.187542	0.185063	0.187752	0.189621	0.194076	0.196765	0.198634
766.814	0.0651444	0.0640821	0.0897681	0.256681	0.255957	0.260962	0.191537	0.190813	0.195818	0.192599	0.191875	0.19688	0.166913	0.166189	0.171194	0.00658	0.00746	0.00789	0.0043	0.00517	0.00561	0.00701	0.00789	0.00832	0.184957	0.183353	0.187928	0.188299	0.186705	0.19127	0.195196	0.193592	0.198167
767.778	0.0436651	0.0423899	0.0596547	0.22653	0.221361	0.228876	0.182865	0.177696	0.185211	0.18414	0.178971	0.186486	0.166876	0.161706	0.169222	0.0063	0.00718	0.00761	0.00404	0.00491	0.00534	0.00674	0.00762	0.00805	0.176565	0.170516	0.177601	0.1801	0.174061	0.181146	0.184587	0.178538	0.185623
768.743	0.0283733	0.0276209	0.0383513	0.190264	0.182307	0.19148	0.161891	0.153934	0.163106	0.162643	0.154686	0.163859	0.151913	0.143956	0.153128	0.00603	0.0069	0.00732	0.00378	0.00465	0.00507	0.00647	0.00734	0.00777	0.155861	0.147034	0.155786	0.158863	0.150036	0.158789	0.16211	0.153283	0.162025
769.707	0.0170115	0.0168796	0.022843	0.151333	0.142623	0.151951	0.134322	0.125611	0.134939	0.134454	0.125743	0.135071	0.12849	0.11978	0.129108	0.00575	0.00662	0.00704	0.00352	0.00439	0.00481	0.0062	0.00707	0.00748	0.128572	0.118991	0.127899	0.130934	0.121353	0.130261	0.133119	0.123539	0.132457
770.671	0.00939961	0.00903773	0.0123901	0.113666	0.108077	0.114344	0.104266	0.0986777	0.104944	0.104628	0.0990395	0.105306	0.101276	0.0956872	0.101954	0.00548	0.00634	0.00675	0.00326	0.00412	0.00454	0.00593	0.00679	0.0072	0.098786	0.0923377	0.0981945	0.101368	0.0949195	0.100766	0.101959	0.0955104	0.101367
771.635	0.00444557	0.0036082	0.00571494	0.0790385	0.0778593	0.080387	0.0745929	0.0734138	0.0759414	0.0754303	0.0742511	0.0767788	0.0733235	0.0721444	0.0746721	0.0052	0.00606	0.00647	0.003	0.00386	0.00427	0.00565	0.00652	0.00692	0.0693929	0.0673538	0.0694714	0.0724303	0.0703911	0.0725088	0.0715343	0.0694852	0.0716128
772.6	0.00112363	-0.000209666	0.00155709	0.0507206	0.0534058	0.0535935	0.049597	0.0522822	0.0524699	0.0509303	0.0536155	0.0538032	0.0491635	0.0518487	0.0520364	0.00492	0.00578	0.00618	0.00274	0.0036	0.004	0.00538	0.00624	0.00664	0.044677	0.0465022	0.0462899	0.0481903	0.0500155	0.0498032	0.0462774	0.0481026	0.0478903
773.564	-0.000944756	-0.00260353	-0.000874429	0.0281664	0.0337426	0.0326586	0.0291112	0.0346873	0.0336033	0.03077	0.0363461	0.0352621	0.0290409	0.034617	0.033533	0.00464	0.0055	0.00589	0.00247	0.00333	0.00372	0.00511	0.00596	0.00636	0.0244712	0.0291873	0.0277133	0.0283	0.0330161	0.0315421	0.0258759	0.030602	0.029118
774.528	-0.00251094	-0.00396422	-0.00275745	0.0125201	0.0185968	0.0182319	0.0150311	0.0211077	0.0207429	0.0164844	0.022561	0.0221961	0.0152776	0.0213542	0.0209894	0.00436	0.00522	0.00561	0.00221	0.00307	0.00345	0.00483	0.00569	0.00607	0.0106711	0.0158877	0.0151329	0.0142744	0.019491	0.0187461	0.0122008	0.0174174	0.0166726
775.492	-0.00348232	-0.0044829	-0.00419183	0.00198109	0.00730089	0.00796301	0.00546341	0.0107832	0.0114453	0.00646399	0.0117838	0.0124459	0.00617292	0.0114927	0.0121548	0.00409	0.00494	0.00532	0.00195	0.0028	0.00318	0.00456	0.00541	0.00579	0.00137341	0.00584321	0.00612533	0.00451399	0.00898379	0.00926592	0.00313486	0.00760466	0.00788678
776.457	-0.0039594	-0.00436895	-0.00590361	-0.00454961	-0.0004592	-0.000398927	-0.000590213	0.0035002	0.00356047	-0.000180659	0.00390975	0.00397002	0.001354	0.00544441	0.00550468	0.00381	0.00466	0.00503	0.00168	0.00254	0.00291	0.00428	0.00513	0.00551	-0.00440021	-0.0011598	-0.00146953	-0.00186066	0.00136975	0.00106002	-0.00252758	0.000712835	0.000393107
777.421	-0.00411422	-0.00395862	-0.00719204	-0.00803303	-0.00601618	-0.00650319	-0.00391881	-0.00190196	-0.00238896	-0.00407442	-0.00205757	-0.00254457	-0.000840991	0.00117586	0.000688855	0.00353	0.00438	0.00474	0.00142	0.00227	0.00264	0.00401	0.00486	0.00522	-0.00744881	-0.00628196	-0.00712896	-0.00549442	-0.00432757	-0.00518457	-0.00556079	-0.00439395	-0.00524095
778.385	-0.00409923	-0.00362828	-0.00735628	-0.0092778	-0.0111959	-0.0106341	-0.00517858	-0.0070967	-0.00653491	-0.00564952	-0.00756764	-0.00700585	-0.00192152	-0.00383964	-0.00327785	0.00325	0.00409	0.00446	0.00116	0.00201	0.00237	0.00373	0.00458	0.00494	-0.00842858	-0.0111867	-0.0109949	-0.00680952	-0.00957764	-0.00937585	-0.00668274	-0.00945086	-0.00924907
779.349	-0.00407379	-0.00346691	-0.00712274	-0.00984018	-0.014833	-0.0131373	-0.00576639	-0.0107592	-0.00906352	-0.00637328	-0.0113661	-0.00967041	-0.00271744	-0.00771028	-0.00601457	0.00297	0.00381	0.00417	0.000893568	0.00174	0.00209	0.00345	0.0043	0.00465	-0.00873639	-0.0145692	-0.0132335	-0.00726685	-0.0131061	-0.0117604	-0.00717812	-0.0130209	-0.0116752
780.313	-0.00431158	-0.00378749	-0.00697654	-0.0119722	-0.0157266	-0.0140546	-0.00766057	-0.011415	-0.00974303	-0.00818466	-0.0119391	-0.0102671	-0.00499561	-0.00875002	-0.00707807	0.00269	0.00353	0.00388	0.000629605	0.00147	0.00182	0.00318	0.00402	0.00437	-0.0103506	-0.014945	-0.013623	-0.00881427	-0.0134091	-0.0120871	-0.00895112	-0.0135455	-0.0122236
781.278	-0.00462217	-0.00429429	-0.00694071	-0.0143952	-0.0158089	-0.0145813	-0.00977302	-0.0111867	-0.00995916	-0.0101009	-0.0115146	-0.010287	-0.00745448	-0.00886814	-0.00764062	0.0024	0.00325	0.00359	0.000365554	0.00121	0.00155	0.0029	0.00374	0.00409	-0.012173	-0.0144367	-0.0135492	-0.0104665	-0.0127246	-0.011837	-0.0108613	-0.0131149	-0.0122374
782.242	-0.00491534	-0.00482724	-0.00736035	-0.0166711	-0.0168005	-0.0162079	-0.0117557	-0.0118851	-0.0112926	-0.0118438	-0.0119732	-0.0113807	-0.00931071	-0.00944013	-0.00884757	0.00212	0.00297	0.0033	0.000101519	0.000942148	0.00128	0.00262	0.00346	0.0038	-0.0138757	-0.0148551	-0.0145926	-0.0119453	-0.0129154	-0.0126607	-0.0124453	-0.0134147	-0.0131622
783.206	-0.00516413	-0.00529233	-0.00775435	-0.018531	-0.0181357	-0.0180908	-0.0133668	-0.0129715	-0.0129266	-0.0132386	-0.0128433	-0.0127984	-0.0107766	-0.0103813	-0.0103364	0.00184	0.00268	0.00301	-0.000162481	0.000676543	0.00101	0.00235	0.00319	0.00352	-0.0152068	-0.0156515	-0.0159366	-0.0130761	-0.0135199	-0.0138084	-0.0136658	-0.0141105	-0.0143956
784.17	-0.00529025	-0.0054947	-0.00769524	-0.0193964	-0.0200789	-0.0199851	-0.0141062	-0.0147886	-0.0146948	-0.0139017	-0.0145842	-0.0144904	-0.0117012	-0.0123836	-0.0122898	0.00156	0.0024	0.00272	-0.000426425	0.000411072	0.000734353	0.00207	0.00291	0.00323	-0.0156662	-0.0171886	-0.0174148	-0.0134753	-0.0149953	-0.0152247	-0.0141934	-0.0157158	-0.015942
785.135	-0.0053575	-0.00557689	-0.00736724	-0.0197582	-0.0218599	-0.0215848	-0.0144007	-0.0165024	-0.0162273	-0.0141813	-0.016283	-0.0160079	-0.0123909	-0.0144927	-0.0142176	0.00128	0.00212	0.00244	-0.00069021	0.000145838	0.000462664	0.00179	0.00263	0.00295	-0.0156807	-0.0186224	-0.0186673	-0.0134911	-0.0164289	-0.0164706	-0.0143505	-0.0172923	-0.0173372
786.099	-0.00539645	-0.00558733	-0.00668467	-0.0198127	-0.0226757	-0.0223784	-0.0144163	-0.0172793	-0.016982	-0.0142254	-0.0170884	-0.0167911	-0.013128	-0.0159911	-0.0156937	0.001	0.00184	0.00215	-0.000953815	-0.000119138	0.000191213	0.00152	0.00235	0.00266	-0.0154163	-0.0191193	-0.019132	-0.0132715	-0.0169693	-0.0169823	-0.0143196	-0.0180127	-0.0180254
787.063	-0.00542852	-0.00561354	-0.00602967	-0.0198646	-0.0228892	-0.0227377	-0.0144361	-0.0174607	-0.0173092	-0.014251	-0.0172756	-0.0171242	-0.0138349	-0.0168595	-0.0167081	0.000722973	0.00156	0.00186	-0.00122	-0.000383835	-7.99806e-05	0.00124	0.00207	0.00238	-0.015159	-0.0190207	-0.0191692	-0.013031	-0.0168918	-0.0170442	-0.014192	-0.0180466	-0.0182051
788.027	-0.00550015	-0.00579361	-0.00572485	-0.0203418	-0.0222218	-0.0227044	-0.0148416	-0.0167216	-0.0172043	-0.0145482	-0.0164281	-0.0169108	-0.0146169	-0.0164969	-0.0169796	0.000443238	0.00128	0.00157	-0.00148	-0.000648151	-0.000350811	0.000964768	0.0018	0.00209	-0.0152849	-0.0180016	-0.0187743	-0.0130682	-0.01578	-0.01656	-0.0141733	-0.0168885	-0.0176612
788.992	-0.00556699	-0.00602418	-0.00586304	-0.0210707	-0.0217944	-0.0227577	-0.0155038	-0.0162274	-0.0171907	-0.0150466	-0.0157702	-0.0167335	-0.0152077	-0.0159314	-0.0168946	0.000163798	0.000994837	0.00129	-0.00174	-0.000912064	-0.000621258	0.000688819	0.00152	0.00181	-0.0156676	-0.0172223	-0.0184807	-0.0133066	-0.0148582	-0.0161122	-0.0141911	-0.015746	-0.0169992
789.956	-0.00557972	-0.00631013	-0.00694067	-0.0219499	-0.0232078	-0.0239072	-0.0163702	-0.017628	-0.0183274	-0.0156398	-0.0168976	-0.017597	-0.0150093	-0.0162671	-0.0169665	-0.000115326	0.000714659	0.000998911	-0.00201	-0.00118	-0.000891303	0.000413135	0.00124	0.00153	-0.0162549	-0.0183427	-0.0193264	-0.0136298	-0.0157176	-0.0167057	-0.0139375	-0.0160222	-0.0170116
790.92	-0.00559975	-0.00646485	-0.00806951	-0.0231913	-0.0247445	-0.024603	-0.0175916	-0.0191447	-0.0190032	-0.0167265	-0.0182796	-0.0181381	-0.0151218	-0.016675	-0.0165335	-0.000394029	0.000434982	0.000712662	-0.00227	-0.00144	-0.00116	0.00013782	0.000966832	0.00124	-0.0171976	-0.0195797	-0.0197159	-0.0144565	-0.0168396	-0.0169781	-0.0143291	-0.0167112	-0.0168429
791.884	-0.00565777	-0.00615875	-0.00839588	-0.0255524	-0.0248432	-0.0229255	-0.0198947	-0.0191854	-0.0172677	-0.0193937	-0.0186844	-0.0167667	-0.0171565	-0.0164473	-0.0145296	-0.000672291	0.000155827	0.000426916	-0.00253	-0.0017	-0.00143	-0.000137105	0.000691014	0.000962103	-0.0192224	-0.0193413	-0.0176946	-0.0168637	-0.0169844	-0.0153367	-0.0171229	-0.0172418	-0.0155951
792.848	-0.00579672	-0.00582569	-0.00831249	-0.027295	-0.0246367	-0.020994	-0.0214983	-0.01884	-0.0151972	-0.0214693	-0.018811	-0.0151683	-0.0189825	-0.0163242	-0.0126815	-0.000950093	-0.000122787	0.000141692	-0.00279	-0.00196	-0.0017	-0.000411621	0.000415685	0.000680164	-0.0205482	-0.0187172	-0.0153389	-0.0186793	-0.016851	-0.0134683	-0.0194888	-0.0176577	-0.0142795
793.813	-0.00613459	-0.00584905	-0.00766939	-0.026271	-0.0249933	-0.0205006	-0.0201364	-0.0188587	-0.014366	-0.0204219	-0.0191442	-0.0146516	-0.0186016	-0.0173239	-0.0128312	-0.00123	-0.000400754	-0.000142903	-0.00305	-0.00222	-0.00197	-0.000685624	0.000140951	0.000398802	-0.0189064	-0.0184579	-0.0142231	-0.0173719	-0.0169242	-0.0126816	-0.0183272	-0.0178761	-0.0136413
794.777	-0.00647702	-0.00605067	-0.00724086	-0.0244679	-0.0251449	-0.0208077	-0.0179908	-0.0186679	-0.0143307	-0.0184172	-0.0190942	-0.014757	-0.017227	-0.0179041	-0.0135668	-0.0015	-0.000678055	-0.000426849	-0.00331	-0.00248	-0.00223	-0.000959094	-0.000133169	0.000118036	-0.0164908	-0.0179898	-0.0139038	-0.0151072	-0.0166142	-0.012527	-0.0162033	-0.0177063	-0.0136203
795.741	-0.00667069	-0.006504	-0.008165	-0.0231881	-0.0244839	-0.0221657	-0.0165174	-0.0178132	-0.015495	-0.0166841	-0.0179799	-0.0156617	-0.0150231	-0.0163188	-0.0140007	-0.00178	-0.000954669	-0.000710128	-0.00357	-0.00274	-0.0025	-0.00123	-0.000406655	-0.000162114	-0.0147374	-0.0168585	-0.0147849	-0.0131141	-0.0152399	-0.0131617	-0.0147319	-0.016851	-0.0147773
796.705	-0.00671038	-0.00683758	-0.00920037	-0.0223389	-0.0233976	-0.0236017	-0.0156285	-0.0166872	-0.0168913	-0.0155013	-0.01656	-0.0167641	-0.0131385	-0.0141972	-0.0144013	-0.00206	-0.00123	-0.000992633	-0.00383	-0.003	-0.00277	-0.0015	-0.000679403	-0.000441543	-0.0135685	-0.0154572	-0.0158986	-0.0116713	-0.01356	-0.0139941	-0.0136681	-0.0155473	-0.0159893
797.67	-0.00646912	-0.0065526	-0.00928086	-0.0225823	-0.0220418	-0.0241931	-0.0161132	-0.0155727	-0.017724	-0.0160297	-0.0154892	-0.0176405	-0.0133014	-0.0127609	-0.0149123	-0.00233	-0.00151	-0.00127	-0.00409	-0.00326	-0.00303	-0.00178	-0.000951394	-0.000720232	-0.0137832	-0.0140627	-0.016454	-0.0119397	-0.0122292	-0.0146105	-0.0136254	-0.0139135	-0.0162961
798.634	-0.00615889	-0.0061046	-0.00901855	-0.0229563	-0.020504	-0.024039	-0.0167975	-0.0143451	-0.0178802	-0.0168517	-0.0143994	-0.0179345	-0.0139378	-0.0114855	-0.0150205	-0.0026	-0.00178	-0.00156	-0.00434	-0.00352	-0.00329	-0.00205	-0.00122	-0.000998162	-0.0141975	-0.0125651	-0.0163202	-0.0125117	-0.0108794	-0.0146445	-0.0136342	-0.0120118	-0.0157687
799.598	-0.00592863	-0.00572026	-0.00852262	-0.0227402	-0.0189073	-0.022795	-0.0168115	-0.0129786	-0.0168663	-0.0170199	-0.013187	-0.0170747	-0.0142176	-0.0103847	-0.0142723	-0.00288	-0.00205	-0.00184	-0.0046	-0.00378	-0.00356	-0.00232	-0.00149	-0.00128	-0.0139315	-0.0109286	-0.0150263	-0.0124199	-0.00940702	-0.0135147	-0.0128933	-0.00989045	-0.0139881
800.562	-0.00584057	-0.00558725	-0.00823562	-0.0218731	-0.0173009	-0.0208685	-0.0160325	-0.0114603	-0.0150279	-0.0162859	-0.0117137	-0.0152812	-0.0136375	-0.00906528	-0.0126329	-0.00315	-0.00233	-0.00211	-0.00485	-0.00403	-0.00382	-0.00259	-0.00176	-0.00155	-0.0128825	-0.00913033	-0.0129179	-0.0114359	-0.00768365	-0.0114612	-0.0114307	-0.00768846	-0.0114661
801.527	-0.00611153	-0.00624378	-0.00903825	-0.0195294	-0.015706	-0.0185092	-0.0134179	-0.0095945	-0.0123977	-0.0132856	-0.00946225	-0.0122654	-0.0104912	-0.00666777	-0.00947095	-0.00342	-0.0026	-0.00239	-0.00511	-0.00428	-0.00408	-0.00285	-0.00203	-0.00183	-0.00999788	-0.0069945	-0.0100077	-0.00817563	-0.00518225	-0.00818543	-0.00844763	-0.00544424	-0.00844742
802.491	-0.00642661	-0.00686488	-0.00972531	-0.0172835	-0.0143303	-0.0158469	-0.0108568	-0.00790369	-0.00942033	-0.0104186	-0.00746542	-0.00898206	-0.00755815	-0.004605	-0.00612163	-0.00369	-0.00287	-0.00267	-0.00536	-0.00454	-0.00434	-0.00312	-0.0023	-0.0021	-0.00716684	-0.00503369	-0.00675033	-0.00505857	-0.00292542	-0.00464206	-0.00564187	-0.00350872	-0.00522536
803.455	-0.00654197	-0.0067292	-0.00898421	-0.0171126	-0.0134989	-0.0124457	-0.0105706	-0.00695695	-0.00590376	-0.0103834	-0.00676972	-0.00571652	-0.00812836	-0.00451471	-0.00346152	-0.00396	-0.00314	-0.00295	-0.00561	-0.00479	-0.0046	-0.00339	-0.00256	-0.00237	-0.0066106	-0.00381695	-0.00295376	-0.00477336	-0.00197972	-0.00111652	-0.00511337	-0.00232973	-0.00146653
804.419	-0.00646137	-0.00606415	-0.00801787	-0.0169823	-0.0128805	-0.0102527	-0.0105209	-0.00641912	-0.00379137	-0.0109182	-0.00681633	-0.00418859	-0.00896444	-0.00486262	-0.00223487	-0.00423	-0.0034	-0.00322	-0.00587	-0.00504	-0.00486	-0.00365	-0.00283	-0.00265	-0.00629093	-0.00301912	-0.00057137	-0.00504815	-0.00177633	0.000671412	-0.00494672	-0.00166491	0.000782841
805.384	-0.00613323	-0.004658	-0.00803824	-0.0148411	-0.0122395	-0.0124534	-0.00870789	-0.00610628	-0.00632013	-0.0101831	-0.00758152	-0.00779537	-0.00680288	-0.00420128	-0.00441513	-0.0045	-0.00367	-0.00349	-0.00612	-0.00529	-0.00511	-0.00392	-0.00309	-0.00292	-0.00420789	-0.00243628	-0.00283013	-0.00406313	-0.00229152	-0.00268537	-0.00329673	-0.00152513	-0.00190898
806.348	-0.00547971	-0.00310675	-0.00770563	-0.0127177	-0.0116134	-0.0148969	-0.00723801	-0.00613365	-0.00941722	-0.00961097	-0.00850661	-0.0117902	-0.00501209	-0.00390773	-0.00719131	-0.00476	-0.00394	-0.00377	-0.00636	-0.00554	-0.00537	-0.00418	-0.00336	-0.00319	-0.00247801	-0.00219365	-0.00564722	-0.00325097	-0.00296661	-0.00642019	-0.00197281	-0.00168845	-0.00514203
807.312	-0.00423961	-0.00200893	-0.00554217	-0.0124948	-0.0109431	-0.0135605	-0.00825516	-0.00670347	-0.0093209	-0.0104858	-0.00893415	-0.0115516	-0.0069526	-0.00540091	-0.00801834	-0.00503	-0.0042	-0.00404	-0.00661	-0.00579	-0.00562	-0.00444	-0.00362	-0.00346	-0.00322516	-0.00250347	-0.0052809	-0.00387584	-0.00314415	-0.00593158	-0.00275687	-0.00202518	-0.00480262
808.276	-0.00291137	-0.00114531	-0.00317433	-0.0125588	-0.0102821	-0.0112462	-0.00964743	-0.00737074	-0.00833485	-0.0114135	-0.0091368	-0.0101009	-0.00938447	-0.00710778	-0.00807189	-0.00529	-0.00446	-0.00431	-0.00686	-0.00603	-0.00588	-0.00471	-0.00388	-0.00372	-0.00435743	-0.00291074	-0.00402485	-0.00455348	-0.0031068	-0.00422091	-0.00380625	-0.00235956	-0.00348367
809.24	-0.00192648	-0.000459265	-0.00190152	-0.0115143	-0.00970129	-0.00948664	-0.00958778	-0.0077748	-0.00756015	-0.011055	-0.00924202	-0.00902737	-0.00961274	-0.00779976	-0.00758511	-0.00555	-0.00473	-0.00458	-0.0071	-0.00628	-0.00613	-0.00497	-0.00414	-0.00399	-0.00403778	-0.0030448	-0.00298015	-0.003955	-0.00296202	-0.00289737	-0.00347619	-0.00249321	-0.00242856
810.205	-0.00122454	-6.1406e-05	-0.00122705	-0.0105899	-0.00908945	-0.00806749	-0.00936536	-0.00786492	-0.00684295	-0.0105285	-0.00902805	-0.00800608	-0.00936285	-0.0078624	-0.00684044	-0.00581	-0.00499	-0.00484	-0.00735	-0.00652	-0.00638	-0.00522	-0.0044	-0.00425	-0.00355536	-0.00287492	-0.00200295	-0.00317849	-0.00250805	-0.00162608	-0.00305476	-0.00237431	-0.00150235
811.169	-0.000935268	-7.44776e-05	-0.0011519	-0.0108354	-0.0083897	-0.00745204	-0.00990014	-0.00745443	-0.00651677	-0.0107609	-0.00831522	-0.00737756	-0.00968351	-0.0072378	-0.00630014	-0.00607	-0.00524	-0.00511	-0.00759	-0.00676	-0.00663	-0.00548	-0.00465	-0.00452	-0.00383014	-0.00221443	-0.00140677	-0.00317093	-0.00155522	-0.00074756	-0.00355834	-0.00194262	-0.00113497
812.133	-0.000919636	-0.000405429	-0.00148237	-0.0113923	-0.00751018	-0.00714026	-0.0104726	-0.00659054	-0.00622062	-0.0109868	-0.00710475	-0.00673483	-0.00990988	-0.00602781	-0.00565789	-0.00633	-0.0055	-0.00537	-0.00783	-0.007	-0.00687	-0.00574	-0.00491	-0.00478	-0.00414261	-0.00109054	-0.000850624	-0.00315682	-0.000104746	0.00013517	-0.00408716	-0.00103509	-0.000795171
813.097	-0.00110528	-0.00105374	-0.00200155	-0.0121374	-0.00635997	-0.00688456	-0.0110321	-0.00525468	-0.00577928	-0.0110837	-0.00530623	-0.00583083	-0.0101359	-0.00435841	-0.00488301	-0.00659	-0.00576	-0.00564	-0.00807	-0.00724	-0.00712	-0.00599	-0.00516	-0.00504	-0.00444213	0.000505317	-0.000139281	-0.00301368	0.00193377	0.00128917	-0.00447045	0.000476996	-0.000167602
814.062	-0.00142189	-0.00186457	-0.00278003	-0.011914	-0.00487939	-0.00639091	-0.0104922	-0.0034575	-0.00496901	-0.0100495	-0.00301482	-0.00452634	-0.00913401	-0.00209936	-0.00361087	-0.00684	-0.00601	-0.0059	-0.00831	-0.00748	-0.00736	-0.00624	-0.00541	-0.0053	-0.00365215	0.0025525	0.000930986	-0.00173948	0.00446518	0.00283366	-0.00354767	0.00265699	0.00103547
815.026	-0.00175346	-0.00266695	-0.0038989	-0.00891373	-0.00297791	-0.00524732	-0.00716027	-0.00122445	-0.00349386	-0.00624679	-0.000310969	-0.00258038	-0.00501483	0.00092099	-0.00134842	-0.0071	-0.00626	-0.00616	-0.00855	-0.00771	-0.00761	-0.0065	-0.00566	-0.00556	-6.02686e-05	0.00503555	0.00266614	0.00230321	0.00739903	0.00502962	0.000625029	0.00572085	0.00335144
815.99	-0.00216469	-0.00350879	-0.00510967	-0.00496818	-0.000657193	-0.00355997	-0.00280349	0.00150749	-0.00139528	-0.00145939	0.0028516	-5.11767e-05	0.000141489	0.00445248	0.0015497	-0.00735	-0.00651	-0.00641	-0.00878	-0.00795	-0.00785	-0.00675	-0.00591	-0.00581	0.00454651	0.00801749	0.00501472	0.00732061	0.0108016	0.00779882	0.00585851	0.00932949	0.00632672
816.954	-0.00271738	-0.00446661	-0.00628261	-0.00113249	0.00236444	-0.00122609	0.0015849	0.00508183	0.0014913	0.00333412	0.00683105	0.00324052	0.00515012	0.00864705	0.00505652	-0.0076	-0.00676	-0.00667	-0.00901	-0.00818	-0.00809	-0.00699	-0.00616	-0.00607	0.0091849	0.0118418	0.0081613	0.0123441	0.015011	0.0113305	0.0108419	0.0135088	0.00982831
817.919	-0.00330414	-0.00528369	-0.00714247	0.00207193	0.00532754	0.00153958	0.00537606	0.00863168	0.00484371	0.00735561	0.0106112	0.00682326	0.0092144	0.01247	0.00868205	-0.00785	-0.00701	-0.00692	-0.00924	-0.00841	-0.00832	-0.00724	-0.00641	-0.00632	0.0132261	0.0156417	0.0117637	0.0165956	0.0190212	0.0151433	0.0149542	0.0173799	0.0135019
818.883	-0.00387775	-0.00579569	-0.00724971	0.00309583	0.00751952	0.0047351	0.00697358	0.0113973	0.00861284	0.00889153	0.0133152	0.0105308	0.0103455	0.0147692	0.0119848	-0.00809	-0.00726	-0.00718	-0.00947	-0.00864	-0.00856	-0.00749	-0.00665	-0.00657	0.0150636	0.0186573	0.0157928	0.0183615	0.0219552	0.0190908	0.0163467	0.0199304	0.017066
819.847	-0.00431936	-0.00580202	-0.0069675	0.00396754	0.00908142	0.00782475	0.00828691	0.0134008	0.0121441	0.00976956	0.0148834	0.0136268	0.010935	0.0160489	0.0147922	-0.00834	-0.0075	-0.00743	-0.0097	-0.00886	-0.00879	-0.00773	-0.00689	-0.00682	0.0166269	0.0209008	0.0195741	0.0194696	0.0237434	0.0224168	0.0172919	0.0215657	0.0202391
820.811	-0.00447646	-0.00483366	-0.00652528	0.00678318	0.00964572	0.0102714	0.0112596	0.0141222	0.0147478	0.0116168	0.0144794	0.015105	0.0133085	0.016171	0.0167966	-0.00858	-0.00774	-0.00768	-0.00993	-0.00909	-0.00902	-0.00797	-0.00713	-0.00707	0.0198396	0.0218622	0.0224278	0.0215468	0.0235694	0.024125	0.0200603	0.0220828	0.0226484
821.775	-0.00440289	-0.00353141	-0.00588471	0.0097901	0.0100254	0.0120773	0.014193	0.0144283	0.0164802	0.0133215	0.0135568	0.0156087	0.0156748	0.0159101	0.017962	-0.00882	-0.00798	-0.00792	-0.01015	-0.00931	-0.00925	-0.00821	-0.00737	-0.00731	0.023013	0.0224083	0.0244002	0.0234715	0.0228668	0.0248587	0.0228788	0.0222742	0.0242661
822.74	-0.00410611	-0.00230528	-0.00505112	0.0119297	0.011146	0.0129302	0.0160358	0.0152521	0.0170363	0.014235	0.0134513	0.0152354	0.0169808	0.0161972	0.0179813	-0.00906	-0.00822	-0.00817	-0.01038	-0.00953	-0.00948	-0.00845	-0.00761	-0.00755	0.0250958	0.0234721	0.0252063	0.024615	0.0229813	0.0247154	0.024686	0.0230623	0.0247864
823.704	-0.00357278	-0.0013786	-0.00412306	0.013216	0.0123026	0.0132372	0.0167887	0.0158754	0.01681	0.0145946	0.0136812	0.0146158	0.017339	0.0164257	0.0173603	-0.0093	-0.00845	-0.00841	-0.0106	-0.00975	-0.00971	-0.00869	-0.00784	-0.0078	0.0260887	0.0243254	0.02522	0.0251946	0.0234312	0.0243258	0.0256079	0.0238446	0.0247392
824.668	-0.00280862	-0.00137402	-0.0032183	0.0129429	0.0130174	0.013276	0.0157515	0.0158261	0.0160846	0.0143169	0.0143915	0.01465	0.0161612	0.0162357	0.0164943	-0.00954	-0.00869	-0.00865	-0.01082	-0.00997	-0.00993	-0.00892	-0.00807	-0.00803	0.0252915	0.0245161	0.0247346	0.0251369	0.0243615	0.02458	0.0251529	0.0243775	0.024596
825.632	-0.00176393	-0.00150358	-0.00228458	0.0122112	0.0135342	0.0131238	0.0139752	0.0152981	0.0148878	0.0137148	0.0150378	0.0146274	0.0144958	0.0158188	0.0154084	-0.00977	-0.00892	-0.00889	-0.01103	-0.01018	-0.01015	-0.00915	-0.0083	-0.00827	0.0237452	0.0242181	0.0237778	0.0247448	0.0252178	0.0247774	0.0240936	0.0245665	0.0241262
826.597	-0.000475291	-0.00148055	-0.00148182	0.0117798	0.0138047	0.0129483	0.0122551	0.0142799	0.0134235	0.0132604	0.0152852	0.0144288	0.0132617	0.0152865	0.0144301	-0.01	-0.00915	-0.00913	-0.01125	-0.01039	-0.01037	-0.00938	-0.00853	-0.00851	0.0222551	0.0234299	0.0225535	0.0245104	0.0256752	0.0247988	0.0231286	0.0243035	0.023427
827.561	0.00131049	-0.000423866	-0.000291292	0.011969	0.0142265	0.012757	0.0106585	0.012916	0.0114465	0.0123929	0.0146503	0.0131809	0.0122603	0.0145178	0.0130483	-0.01023	-0.00938	-0.00936	-0.01146	-0.0106	-0.01059	-0.00961	-0.00876	-0.00874	0.0208885	0.022296	0.0208065	0.0238529	0.0252503	0.0237709	0.0219686	0.0233761	0.0218866
828.525	0.00362256	0.00296531	0.00137404	0.0143592	0.0158391	0.0123766	0.0107366	0.0122165	0.00875402	0.0113939	0.0128738	0.00941128	0.0129851	0.014465	0.0110025	-0.01046	-0.0096	-0.00959	-0.01167	-0.01081	-0.0108	-0.00984	-0.00898	-0.00897	0.0211966	0.0218165	0.018344	0.0230639	0.0236838	0.0202113	0.0216143	0.0222342	0.0187617
829.489	0.00709649	0.0077204	0.00464936	0.0159286	0.0166687	0.0125182	0.00883215	0.00957219	0.00542175	0.00820824	0.00894829	0.00479784	0.0112793	0.0120193	0.00786888	-0.01068	-0.00982	-0.00982	-0.01188	-0.01102	-0.01102	-0.01006	-0.0092	-0.0092	0.0195121	0.0193922	0.0152417	0.0200882	0.0199683	0.0158178	0.0188834	0.0187635	0.014613
830.454	0.0126849	0.0134165	0.0114824	0.0129286	0.0141797	0.0146827	0.000243771	0.0014948	0.00199779	-0.000487821	0.000763209	0.0012662	0.00144623	0.00269726	0.00320025	-0.01091	-0.01005	-0.01005	-0.01208	-0.01122	-0.01123	-0.01028	-0.00942	-0.00943	0.0111538	0.0115448	0.0120478	0.0115922	0.0119832	0.0124962	0.00933292	0.00972395	0.0102369
831.418	0.0194658	0.0197275	0.0195226	0.00912082	0.0110969	0.016328	-0.010345	-0.0083689	-0.00313782	-0.0106066	-0.00863058	-0.0033995	-0.0104018	-0.00842569	-0.00319461	-0.01113	-0.01026	-0.01028	-0.01229	-0.01142	-0.01144	-0.0105	-0.00964	-0.00965	0.000785041	0.0018911	0.00714218	0.00168335	0.00278942	0.0080405	-0.00219333	-0.00107726	0.00416382
832.382	0.027286	0.0264444	0.027431	0.00739312	0.00957353	0.0145534	-0.0198929	-0.0177125	-0.0127326	-0.0190513	-0.0168709	-0.011891	-0.0200379	-0.0178574	-0.0128776	-0.01135	-0.01048	-0.0105	-0.01249	-0.01162	-0.01164	-0.01072	-0.00985	-0.00987	-0.00854287	-0.00723246	-0.00223261	-0.00656129	-0.00525088	-0.000251026	-0.0126512	-0.0113408	-0.00634097
833.346	0.0347919	0.0327912	0.03412	0.00661785	0.00878888	0.0119362	-0.028174	-0.026003	-0.0228556	-0.0261733	-0.0240023	-0.020855	-0.0275022	-0.0253312	-0.0221838	-0.01156	-0.01069	-0.01072	-0.01269	-0.01182	-0.01184	-0.01093	-0.01006	-0.01009	-0.016614	-0.015313	-0.0121356	-0.0134833	-0.0121823	-0.00901496	-0.0211044	-0.0198033	-0.016626
834.311	0.0409626	0.0383748	0.037878	0.00694397	0.00894587	0.0101588	-0.0340186	-0.0320167	-0.0308038	-0.0314308	-0.0294289	-0.028216	-0.030934	-0.0289321	-0.0277192	-0.01177	-0.0109	-0.01094	-0.01288	-0.01201	-0.01205	-0.01115	-0.01027	-0.01031	-0.0222486	-0.0211167	-0.0198638	-0.0185508	-0.0174189	-0.016166	-0.0252297	-0.0241078	-0.0228548
835.275	0.0446463	0.0418368	0.0392387	0.00742941	0.00912668	0.00900522	-0.0372169	-0.0355196	-0.0356411	-0.0344074	-0.0327101	-0.0328316	-0.0318093	-0.030112	-0.0302335	-0.01199	-0.01111	-0.01115	-0.01308	-0.0122	-0.01224	-0.01136	-0.01048	-0.01052	-0.0252269	-0.0244096	-0.0244911	-0.0213274	-0.0205101	-0.0205916	-0.026073	-0.0252557	-0.0253372
836.239	0.0437951	0.0412122	0.0378955	0.00683083	0.00821323	0.0093351	-0.0369643	-0.0355819	-0.03446	-0.0343814	-0.032999	-0.0318772	-0.0310647	-0.0296823	-0.0285604	-0.01219	-0.01132	-0.01137	-0.01327	-0.01239	-0.01244	-0.01156	-0.01069	-0.01074	-0.0247743	-0.0242619	-0.02309	-0.0211114	-0.020609	-0.0194372	-0.0236234	-0.0231109	-0.0219391
837.203	0.0400766	0.0379274	0.0346582	0.00620097	0.00700926	0.00960389	-0.0338756	-0.0330674	-0.0304727	-0.0317264	-0.0309181	-0.0283235	-0.0284573	-0.027649	-0.0250543	-0.0124	-0.01152	-0.01158	-0.01346	-0.01258	-0.01263	-0.01177	-0.01089	-0.01094	-0.0214756	-0.0215474	-0.0188927	-0.0182664	-0.0183381	-0.0156935	-0.0186681	-0.0187398	-0.0160951
838.168	0.0338659	0.0321582	0.0297607	0.00628487	0.00587998	0.00819447	-0.027581	-0.0279859	-0.0256714	-0.0258733	-0.0262782	-0.0239637	-0.0234759	-0.0238808	-0.0215663	-0.0126	-0.01172	-0.01178	-0.01365	-0.01276	-0.01282	-0.01197	-0.01109	-0.01115	-0.014981	-0.0162659	-0.0138914	-0.0122233	-0.0135182	-0.0111437	-0.0113698	-0.0126547	-0.0102802
839.132	0.026993	0.0256908	0.0246244	0.00676236	0.00502288	0.00618417	-0.0202306	-0.0219701	-0.0208088	-0.0189284	-0.0206679	-0.0195066	-0.0178621	-0.0196015	-0.0184402	-0.01281	-0.01192	-0.01199	-0.01383	-0.01294	-0.01301	-0.01217	-0.01129	-0.01136	-0.00742063	-0.0100501	-0.00881881	-0.00509841	-0.00772789	-0.00649659	-0.00370153	-0.00632101	-0.00508971
840.096	0.0212709	0.0201897	0.0204552	0.00795276	0.00494003	0.00338685	-0.0133181	-0.0163308	-0.017884	-0.0122369	-0.0152497	-0.0168028	-0.0125024	-0.0155152	-0.0170684	-0.013	-0.01211	-0.01219	-0.01401	-0.01312	-0.0132	-0.01237	-0.01148	-0.01156	-0.000318087	-0.00422083	-0.005694	0.00177307	-0.00212967	-0.00360284	0.00272817	-0.00117457	-0.00264774
841.06	0.017126	0.016196	0.0181333	0.00868269	0.0050828	0.00197584	-0.00844333	-0.0120432	-0.0151502	-0.00751332	-0.0111132	-0.0142202	-0.00945066	-0.0130505	-0.0161575	-0.0132	-0.01231	-0.01239	-0.01419	-0.0133	-0.01338	-0.01257	-0.01167	-0.01176	0.00475667	0.000266776	-0.00276018	0.00667668	0.00218679	-0.000840166	0.0066535	0.00215361	-0.000863351
842.024	0.0160559	0.015307	0.0196427	0.00714197	0.00484606	0.00532152	-0.00891397	-0.0112099	-0.0107344	-0.00816506	-0.010461	-0.00998551	-0.0125007	-0.0147966	-0.0143211	-0.01339	-0.0125	-0.01259	-0.01437	-0.01347	-0.01356	-0.01276	-0.01186	-0.01195	0.00447603	0.00129011	0.00185558	0.00620494	0.00300902	0.00357449	0.00484987	0.00165395	0.00221942
842.989	0.0166608	0.0160184	0.0228784	0.00556022	0.00490144	0.00964658	-0.0111006	-0.0117594	-0.00701423	-0.0104582	-0.0111169	-0.0063718	-0.0173182	-0.017977	-0.0132318	-0.01358	-0.01268	-0.01278	-0.01454	-0.01364	-0.01374	-0.01295	-0.01205	-0.01215	0.0024794	0.000920626	0.00576577	0.00408184	0.00252306	0.0073682	0.00156509	6.31227e-06	0.00485145
843.953	0.0183764	0.0178442	0.0267545	0.00621246	0.00606524	0.0123569	-0.0121639	-0.0123112	-0.00601956	-0.0116317	-0.011779	-0.00548736	-0.020542	-0.0206892	-0.0143976	-0.01377	-0.01287	-0.01297	-0.01471	-0.01381	-0.01391	-0.01314	-0.01223	-0.01234	0.00160605	0.000558825	0.00695044	0.00307826	0.00203103	0.00842264	0.000373235	-0.000683994	0.00571762
844.917	0.0201934	0.0193262	0.030199	0.00715221	0.00729833	0.0132732	-0.0130412	-0.012895	-0.00692014	-0.012174	-0.0120279	-0.00605299	-0.0230467	-0.0229006	-0.0169257	-0.01396	-0.01305	-0.01316	-0.01488	-0.01397	-0.01408	-0.01332	-0.01241	-0.01253	0.000918841	0.000154956	0.00623986	0.00270599	0.0019421	0.00802701	4.07557e-05	-0.00072313	0.00537178
845.881	0.0209428	0.0185177	0.031888	0.00702985	0.00789616	0.0105926	-0.013913	-0.0130466	-0.0103502	-0.0114878	-0.0106215	-0.0079251	-0.0248581	-0.0239918	-0.0212954	-0.01414	-0.01323	-0.01335	-0.01504	-0.01413	-0.01425	-0.0135	-0.01259	-0.01271	0.000227045	0.000183351	0.00299979	0.00355215	0.00350846	0.0063249	0.000579437	0.000535743	0.00335218
846.846	0.020539	0.0163981	0.0314914	0.00632974	0.0076713	0.00659284	-0.0142093	-0.0128677	-0.0139462	-0.0100684	-0.00872682	-0.00980528	-0.0251617	-0.0238201	-0.0248986	-0.01432	-0.0134	-0.01353	-0.01521	-0.01429	-0.01442	-0.01368	-0.01277	-0.01289	0.000110694	0.000532258	-0.000416206	0.00514162	0.00556318	0.00461472	0.0018873	0.00231886	0.0013604
847.81	0.0182667	0.0130592	0.0277479	0.00504805	0.00600826	0.00311556	-0.0132186	-0.0122584	-0.0151511	-0.00801113	-0.00705092	-0.00994363	-0.0226999	-0.0217397	-0.0246324	-0.0145	-0.01357	-0.01371	-0.01537	-0.01445	-0.01458	-0.01386	-0.01294	-0.01307	0.00128139	0.00131159	-0.00144111	0.00735887	0.00739908	0.00463637	0.00403696	0.00407717	0.00131446
848.774	0.014846	0.0092176	0.0221271	0.00329974	0.00348673	-0.000333326	-0.0115463	-0.0113593	-0.0151793	-0.00591786	-0.00573087	-0.00955093	-0.0188273	-0.0186403	-0.0224604	-0.01467	-0.01374	-0.01389	-0.01552	-0.0146	-0.01474	-0.01403	-0.01311	-0.01325	0.00312372	0.00238072	-0.00128934	0.00960214	0.00886913	0.00518907	0.00649645	0.00576344	0.00208338
849.738	0.0105344	0.00559747	0.0153409	0.00118567	0.000354731	-0.00367428	-0.00934874	-0.0101797	-0.0142087	-0.0044118	-0.00524274	-0.00927175	-0.0141553	-0.0149862	-0.0190152	-0.01484	-0.01391	-0.01406	-0.01568	-0.01475	-0.0149	-0.0142	-0.01327	-0.01342	0.00549126	0.00373032	-0.000148691	0.0112682	0.00950726	0.00562825	0.00890071	0.00713977	0.00326076
850.702	0.00600554	0.00226827	0.00840019	-0.00125581	-0.00300819	-0.00678653	-0.00726135	-0.00901373	-0.0127921	-0.00352409	-0.00527646	-0.00905481	-0.009656	-0.0114084	-0.0151867	-0.01501	-0.01407	-0.01423	-0.01583	-0.01489	-0.01505	-0.01437	-0.01344	-0.0136	0.00774865	0.00505627	0.00143793	0.0123059	0.00961354	0.00599519	0.0108816	0.00819927	0.00458092
851.667	0.00194512	-0.00043234	0.00252466	-0.00406227	-0.00623648	-0.00963316	-0.00600739	-0.0081816	-0.0115783	-0.00362993	-0.00580414	-0.00920082	-0.00658693	-0.00876114	-0.0121578	-0.01517	-0.01423	-0.0144	-0.01598	-0.01504	-0.0152	-0.01454	-0.0136	-0.01376	0.00916261	0.0060484	0.00282172	0.0123501	0.00923586	0.00599918	0.0118684	0.00875422	0.00551755
852.631	-0.00142567	-0.00258482	-0.00220096	-0.00690517	-0.00904009	-0.0118831	-0.0054795	-0.00761442	-0.0104574	-0.00432036	-0.00645527	-0.00929831	-0.00470421	-0.00683913	-0.00968216	-0.01533	-0.01439	-0.01456	-0.01612	-0.01518	-0.01535	-0.0147	-0.01375	-0.01393	0.0098505	0.00677558	0.00410255	0.0117996	0.00872473	0.00605169	0.0120842	0.00899923	0.0063362
853.595	-0.00356528	-0.00418058	-0.00509365	-0.00963996	-0.0110775	-0.0132043	-0.00607467	-0.00751219	-0.00963902	-0.00545938	-0.00689689	-0.00902373	-0.0045463	-0.00598382	-0.00811065	-0.01549	-0.01454	-0.01472	-0.01626	-0.01532	-0.01549	-0.01486	-0.01391	-0.01409	0.00941533	0.00702781	0.00508098	0.0108006	0.00842311	0.00646627	0.0113594	0.0089719	0.00702507
854.559	-0.00474908	-0.00514904	-0.0067285	-0.0117523	-0.0121375	-0.0135631	-0.00700319	-0.00738842	-0.00881401	-0.00660323	-0.00698846	-0.00841405	-0.00502377	-0.00540901	-0.00683459	-0.01565	-0.0147	-0.01488	-0.0164	-0.01545	-0.01564	-0.01501	-0.01406	-0.01425	0.00864681	0.00731158	0.00606599	0.00979677	0.00846154	0.00722595	0.0103507	0.00901551	0.00777992
855.524	-0.00497105	-0.00548736	-0.00745884	-0.0126769	-0.0119064	-0.0125033	-0.0077058	-0.00693537	-0.00753228	-0.00718949	-0.00641906	-0.00701597	-0.00521801	-0.00444757	-0.00504449	-0.0158	-0.01484	-0.01504	-0.01654	-0.01558	-0.01577	-0.01517	-0.01421	-0.0144	0.0080942	0.00790463	0.00750772	0.00935051	0.00916094	0.00875403	0.00963531	0.00944574	0.00903883
856.488	-0.00453375	-0.00498372	-0.00726685	-0.0124219	-0.0103506	-0.0109606	-0.00788815	-0.00581685	-0.00642682	-0.00743818	-0.00536689	-0.00597686	-0.00515506	-0.00308376	-0.00369373	-0.01595	-0.01499	-0.01519	-0.01667	-0.01571	-0.01591	-0.01531	-0.01435	-0.01455	0.00806185	0.00917315	0.00876318	0.00923182	0.0103431	0.00993314	0.0093317	0.010443	0.010033
857.452	-0.00379549	-0.00319751	-0.00619944	-0.0107114	-0.00690028	-0.0105199	-0.00691588	-0.00310479	-0.00672446	-0.00751385	-0.00370277	-0.00732243	-0.00451192	-0.000700839	-0.0043205	-0.0161	-0.01513	-0.01534	-0.0168	-0.01583	-0.01604	-0.01546	-0.01449	-0.0147	0.00918412	0.0120252	0.00861554	0.00928615	0.0121272	0.00871757	0.00991109	0.0127522	0.00934252
858.416	-0.00258295	-0.000812221	-0.00441563	-0.00783283	-0.00285008	-0.00877649	-0.00524988	-0.000267139	-0.00619354	-0.00702061	-0.00203786	-0.00796427	-0.00341719	0.00156555	-0.00436085	-0.01624	-0.01527	-0.01548	-0.01693	-0.01595	-0.01617	-0.0156	-0.01463	-0.01485	0.0109901	0.0150029	0.00928646	0.00990939	0.0139121	0.00820573	0.0110328	0.0150455	0.0093391
859.381	-0.000785795	0.00158856	-0.00205287	-0.00385049	0.000368368	-0.00262989	-0.00306469	0.00115416	-0.00184409	-0.00543905	-0.00122019	-0.00421845	-0.00179761	0.00242124	-0.000577013	-0.01638	-0.0154	-0.01562	-0.01705	-0.01607	-0.01629	-0.01574	-0.01477	-0.01499	0.0133153	0.0165542	0.0137759	0.011611	0.0148498	0.0120716	0.012519	0.0157679	0.0129896
860.345	0.00142662	0.0041458	0.000777295	0.000841601	0.00373582	0.00424866	-0.000585023	0.00230919	0.00282203	-0.0033042	-0.000409983	0.00010286	6.43058e-05	0.00295852	0.00347136	-0.01651	-0.01553	-0.01576	-0.01717	-0.01619	-0.01642	-0.01588	-0.0149	-0.01513	0.015925	0.0178392	0.018582	0.0138658	0.01578	0.0165229	0.0144119	0.0163262	0.017069
861.309	0.00418032	0.00707015	0.00440366	0.00586678	0.00804828	0.00869376	0.00168646	0.00386795	0.00451344	-0.00120337	0.000978128	0.00162361	0.00146312	0.00364461	0.0042901	-0.01665	-0.01566	-0.0159	-0.01728	-0.0163	-0.01653	-0.01601	-0.01503	-0.01527	0.0183365	0.019528	0.0204134	0.0160766	0.0172781	0.0181536	0.0164699	0.0176714	0.0185568
862.273	0.00669959	0.00956896	0.00736778	0.0111087	0.0124283	0.0122883	0.00440908	0.0057287	0.0055887	0.00153971	0.00285933	0.00271933	0.00374089	0.00506051	0.00492051	-0.01678	-0.01578	-0.01603	-0.0174	-0.0164	-0.01665	-0.01614	-0.01515	-0.0154	0.0211891	0.0215087	0.0216187	0.0189397	0.0192593	0.0193693	0.0193366	0.0196662	0.0197762
863.237	0.0082873	0.0108672	0.00802789	0.016847	0.0163439	0.0156728	0.00855965	0.00805659	0.00738548	0.00597979	0.00547673	0.00480561	0.00881906	0.008316	0.00764489	-0.0169	-0.0159	-0.01616	-0.01751	-0.01651	-0.01676	-0.01627	-0.01527	-0.01553	0.0254597	0.0239566	0.0235455	0.0234898	0.0219867	0.0215656	0.0241723	0.0226693	0.0222582
864.202	0.0088337	0.0111227	0.00726272	0.0215168	0.0195546	0.0185089	0.0126831	0.0107209	0.00967519	0.0103941	0.00843198	0.00738623	0.014254	0.0122919	0.0112462	-0.01703	-0.01602	-0.01628	-0.01761	-0.01661	-0.01687	-0.0164	-0.01539	-0.01565	0.0297131	0.0267409	0.0259552	0.0280041	0.025042	0.0242562	0.0291662	0.026194	0.0254083
865.166	0.00782977	0.010186	0.00519516	0.0235653	0.0217855	0.0209839	0.0157355	0.0139558	0.0131542	0.0133793	0.0115995	0.0107979	0.0183702	0.0165904	0.0157888	-0.01715	-0.01614	-0.0164	-0.01772	-0.01671	-0.01697	-0.01652	-0.01551	-0.01577	0.0328855	0.0300958	0.0295542	0.0310993	0.0283095	0.0277679	0.0329935	0.0302037	0.0296621
866.13	0.00577611	0.00820403	0.00245095	0.023236	0.0226082	0.0221614	0.0174599	0.016832	0.0163853	0.015032	0.0144041	0.0139574	0.0207851	0.0201572	0.0197105	-0.01726	-0.01625	-0.01652	-0.01782	-0.0168	-0.01708	-0.01663	-0.01562	-0.01589	0.0347199	0.033082	0.0329053	0.032852	0.0312041	0.0310374	0.0353256	0.0336878	0.033511
867.095	0.00276532	0.00519269	-0.000203573	0.0195991	0.021511	0.0210811	0.0168337	0.0187457	0.0183158	0.0144064	0.0163183	0.0158884	0.0198026	0.0217146	0.0212847	-0.01737	-0.01635	-0.01664	-0.01791	-0.01689	-0.01717	-0.01675	-0.01572	-0.01601	0.0342037	0.0350957	0.0349558	0.0323164	0.0332083	0.0330584	0.034905	0.0357869	0.035647
868.059	-0.000487635	0.001395	-0.0030673	0.0146215	0.0184683	0.0180015	0.0151091	0.018956	0.0184892	0.0132265	0.0170733	0.0166065	0.0176888	0.0215356	0.0210688	-0.01748	-0.01646	-0.01675	-0.018	-0.01698	-0.01727	-0.01686	-0.01583	-0.01612	0.0325891	0.035416	0.0352392	0.0312265	0.0340533	0.0338765	0.0332442	0.0360611	0.0358843
869.023	-0.00328006	-0.00350311	-0.00639269	0.0101698	0.0124485	0.0116844	0.0134498	0.0157286	0.0149644	0.0136729	0.0159517	0.0151875	0.0165624	0.0188412	0.0180771	-0.01759	-0.01656	-0.01685	-0.01809	-0.01706	-0.01736	-0.01696	-0.01593	-0.01623	0.0310398	0.0322886	0.0318144	0.0317629	0.0330117	0.0325475	0.0317119	0.0329607	0.0324965
869.987	-0.00548254	-0.00781435	-0.00955273	0.0056158	0.00595752	0.00565973	0.0110983	0.0114401	0.0111423	0.0134302	0.0137719	0.0134741	0.0151685	0.0155103	0.0152125	-0.01769	-0.01665	-0.01696	-0.01818	-0.01714	-0.01744	-0.01707	-0.01603	-0.01633	0.0287883	0.0280901	0.0281023	0.0316102	0.0309119	0.0309141	0.0295429	0.0288446	0.0288468
870.951	-0.00652025	-0.00937054	-0.0120674	0.000788801	0.00183161	0.0051093	0.00730905	0.00835186	0.0116296	0.0101593	0.0112021	0.0144798	0.0128562	0.013899	0.0171767	-0.01779	-0.01674	-0.01706	-0.01826	-0.01722	-0.01753	-0.01717	-0.01612	-0.01643	0.0250991	0.0250919	0.0286896	0.0284193	0.0284221	0.0320098	0.0260597	0.0260525	0.0296402
871.916	-0.00702682	-0.00992836	-0.0137482	-0.00381661	-0.00195227	0.00383978	0.00321021	0.00507455	0.0108666	0.00611175	0.0079761	0.0137681	0.00993156	0.0117959	0.017588	-0.01788	-0.01683	-0.01715	-0.01834	-0.01729	-0.01761	-0.01726	-0.01621	-0.01653	0.0210902	0.0219046	0.0280166	0.0244518	0.0252661	0.0313781	0.0222475	0.0230618	0.0291739
872.88	-0.00746169	-0.01064	-0.0140291	-0.00773405	-0.00695113	-0.00495789	-0.000272362	0.000510564	0.0025038	0.00290597	0.00368889	0.00568213	0.00629506	0.00707798	0.00907122	-0.01798	-0.01692	-0.01724	-0.01842	-0.01736	-0.01768	-0.01735	-0.0163	-0.01662	0.0177076	0.0174306	0.0197438	0.021326	0.0210489	0.0233621	0.0189223	0.0186552	0.0209684
873.844	-0.00777259	-0.0111507	-0.0135623	-0.0110496	-0.0117267	-0.0142548	-0.00327699	-0.00395413	-0.00648216	0.00010114	-0.000576005	-0.00310404	0.00251268	0.00183554	-0.000692492	-0.01806	-0.017	-0.01733	-0.01849	-0.01742	-0.01776	-0.01744	-0.01638	-0.01671	0.014783	0.0130459	0.0108478	0.0185911	0.016844	0.014656	0.0159634	0.0142263	0.0120282
874.808	-0.00809687	-0.0116301	-0.0127928	-0.0134876	-0.015214	-0.0182801	-0.00539071	-0.00711709	-0.0101832	-0.00185743	-0.00358381	-0.00664991	-0.000694801	-0.00242118	-0.00548728	-0.01815	-0.01708	-0.01742	-0.01855	-0.01748	-0.01783	-0.01753	-0.01646	-0.0168	0.0127593	0.00996291	0.00723682	0.0166926	0.0138962	0.0111801	0.013695	0.0108986	0.00817252
875.773	-0.00832507	-0.0116571	-0.0117754	-0.0156666	-0.0178504	-0.0200682	-0.00734156	-0.00952532	-0.0117431	-0.00400956	-0.00619332	-0.0084111	-0.00389121	-0.00607497	-0.00829275	-0.01823	-0.01715	-0.0175	-0.01862	-0.01754	-0.01789	-0.01761	-0.01653	-0.01688	0.0108884	0.00762468	0.00575689	0.0146104	0.0113467	0.0094789	0.011579	0.00831524	0.00644745
876.737	-0.00836819	-0.0106131	-0.0106055	-0.018189	-0.0195086	-0.0203777	-0.00982076	-0.0111404	-0.0120095	-0.00757589	-0.00889553	-0.00976459	-0.00758346	-0.00890311	-0.00977216	-0.0183	-0.01722	-0.01758	-0.01868	-0.0176	-0.01795	-0.01769	-0.0166	-0.01696	0.00847924	0.00607959	0.00557054	0.0111041	0.00870447	0.00818541	0.0091708	0.00676116	0.0062521
877.701	-0.00830216	-0.00925945	-0.00960656	-0.0208279	-0.0208185	-0.0202653	-0.0125258	-0.0125164	-0.0119632	-0.0115685	-0.0115591	-0.0110059	-0.0112214	-0.011212	-0.0106588	-0.01838	-0.01729	-0.01765	-0.01874	-0.01765	-0.01801	-0.01776	-0.01667	-0.01704	0.00585422	0.00477363	0.00568684	0.00717151	0.00609092	0.00700412	0.00656431	0.00548372	0.00640692
878.665	-0.0081571	-0.00804657	-0.00916239	-0.023743	-0.0224355	-0.0212484	-0.0155859	-0.0142784	-0.0130913	-0.0156964	-0.014389	-0.0132018	-0.0145806	-0.0132732	-0.012086	-0.01845	-0.01735	-0.01772	-0.01879	-0.01769	-0.01806	-0.01783	-0.01674	-0.01711	0.00286413	0.00307156	0.00462873	0.0030936	0.00330103	0.0048582	0.00351534	0.00373277	0.00528994
879.63	-0.00798146	-0.00728902	-0.00918772	-0.0263783	-0.0241561	-0.0227044	-0.0183969	-0.0161747	-0.0147229	-0.0190893	-0.0168671	-0.0154154	-0.0171906	-0.0149684	-0.0135167	-0.01851	-0.01741	-0.01779	-0.01884	-0.01773	-0.01811	-0.0179	-0.0168	-0.01717	0.00011312	0.00123535	0.00306707	-0.000249316	0.000862913	0.00269464	0.000643559	0.00176579	0.00358751
880.594	-0.00783728	-0.00764709	-0.00987284	-0.0282896	-0.026262	-0.0248852	-0.0204523	-0.0184247	-0.017048	-0.0206425	-0.0186149	-0.0172381	-0.0184168	-0.0163891	-0.0150124	-0.01857	-0.01746	-0.01785	-0.01888	-0.01777	-0.01816	-0.01796	-0.01685	-0.01724	-0.00188234	-0.000964668	0.000802049	-0.00176254	-0.000844864	0.000921853	-0.00165487	-0.000737199	0.00102952
881.558	-0.00771395	-0.00853412	-0.0107749	-0.0293024	-0.0279527	-0.0266854	-0.0215884	-0.0202387	-0.0189714	-0.0207683	-0.0194186	-0.0181513	-0.0185275	-0.0171778	-0.0159105	-0.01863	-0.01751	-0.01791	-0.01893	-0.01781	-0.0182	-0.01802	-0.0169	-0.0173	-0.00295843	-0.00272875	-0.00106143	-0.00183826	-0.00160858	4.87328e-05	-0.00298357	-0.00275389	-0.00108657
882.522	-0.00759345	-0.00976765	-0.0115148	-0.0287755	-0.028443	-0.0268324	-0.0211821	-0.0208495	-0.019239	-0.0190079	-0.0186753	-0.0170648	-0.0172607	-0.0169282	-0.0153176	-0.01869	-0.01756	-0.01796	-0.01896	-0.01784	-0.01824	-0.01808	-0.01695	-0.01735	-0.00249205	-0.00328954	-0.00127898	-4.78534e-05	-0.000835337	0.00117522	-0.00245736	-0.00325484	-0.00124428
883.486	-0.00756003	-0.0107954	-0.0120914	-0.0276645	-0.0279695	-0.0260788	-0.0201044	-0.0204095	-0.0185188	-0.016869	-0.0171741	-0.0152833	-0.0155731	-0.0158781	-0.0139874	-0.01874	-0.0176	-0.01801	-0.019	-0.01787	-0.01827	-0.01813	-0.017	-0.01741	-0.00136443	-0.00280947	-0.000508753	0.00213098	0.000695947	0.00298666	-0.00117635	-0.00261139	-0.000310673
884.451	-0.00773555	-0.0107918	-0.012377	-0.0267958	-0.0262874	-0.0245745	-0.0190602	-0.0185519	-0.016839	-0.016004	-0.0154956	-0.0137827	-0.0144188	-0.0139104	-0.0121975	-0.01878	-0.01764	-0.01806	-0.01903	-0.01789	-0.0183	-0.01818	-0.01704	-0.01745	-0.00028022	-0.00091186	0.00122102	0.00302603	0.00239439	0.00451726	3.35292e-05	-0.00059811	0.00152477
885.415	-0.0079892	-0.0103946	-0.012372	-0.0259152	-0.0240557	-0.0228542	-0.017926	-0.0160665	-0.014865	-0.0155206	-0.0136611	-0.0124595	-0.0135432	-0.0116838	-0.0104822	-0.01883	-0.01768	-0.0181	-0.01906	-0.01791	-0.01833	-0.01822	-0.01708	-0.0175	0.000903977	0.00161346	0.00323503	0.00353942	0.0042489	0.00587047	0.00128484	0.00200432	0.00362589
886.379	-0.00828969	-0.00988214	-0.0119964	-0.0253288	-0.0219946	-0.0217885	-0.0170391	-0.0137049	-0.0134988	-0.0154467	-0.0121124	-0.0119063	-0.0133324	-0.00999815	-0.00979207	-0.01887	-0.01771	-0.01814	-0.01908	-0.01792	-0.01835	-0.01826	-0.01711	-0.01754	0.0018309	0.00400513	0.00464122	0.00363334	0.00580757	0.00644366	0.00212486	0.0043091	0.00494518
887.343	-0.00846042	-0.00950803	-0.0113638	-0.0241825	-0.019676	-0.0205188	-0.0157221	-0.0112156	-0.0120583	-0.0146745	-0.010168	-0.0110107	-0.0128187	-0.00831225	-0.00915499	-0.0189	-0.01774	-0.01817	-0.0191	-0.01794	-0.01837	-0.0183	-0.01714	-0.01758	0.00317792	0.00652441	0.00611167	0.00442553	0.00777202	0.00735927	0.00347356	0.00682005	0.0064173
888.308	-0.00823773	-0.00982764	-0.0104026	-0.0214989	-0.0169775	-0.0184125	-0.0132612	-0.00873972	-0.0101747	-0.0116713	-0.00714981	-0.00858482	-0.0110963	-0.00657484	-0.00800985	-0.01893	-0.01776	-0.01821	-0.01911	-0.01794	-0.01839	-0.01833	-0.01716	-0.01761	0.00566883	0.00902028	0.00803527	0.00743874	0.0107902	0.00980518	0.00637238	0.00972383	0.00873882
889.272	-0.00785151	-0.0102144	-0.00958786	-0.0179542	-0.0137033	-0.015662	-0.0101027	-0.00585174	-0.00781044	-0.00773979	-0.00348881	-0.00544751	-0.00836638	-0.0041154	-0.00607409	-0.01896	-0.01778	-0.01823	-0.01912	-0.01795	-0.0184	-0.01836	-0.01719	-0.01764	0.00885727	0.0119283	0.0104196	0.0113802	0.0144612	0.0129525	0.00997426	0.0130552	0.0115465
890.236	-0.00741784	-0.0101594	-0.00956237	-0.0139197	-0.00954796	-0.0122031	-0.00650188	-0.00213012	-0.00478521	-0.00376031	0.00061145	-0.00204364	-0.00435735	1.44105e-05	-0.00264068	-0.01898	-0.0178	-0.01825	-0.01913	-0.01795	-0.01841	-0.01839	-0.0172	-0.01766	0.0124781	0.0156699	0.0134648	0.0153697	0.0185614	0.0163664	0.0136256	0.0168073	0.0146122
891.2	-0.00701448	-0.00986542	-0.00975091	-0.00933303	-0.00471838	-0.00817282	-0.00231855	0.0022961	-0.00115834	0.000532389	0.00514704	0.0016926	0.000417877	0.00503253	0.00157809	-0.019	-0.01781	-0.01827	-0.01914	-0.01794	-0.01841	-0.01841	-0.01722	-0.01768	0.0166814	0.0201061	0.0171117	0.0196724	0.023087	0.0201026	0.0177575	0.0211821	0.0181877
892.165	-0.00677508	-0.00926913	-0.00979923	-0.00396843	0.000978406	-0.00351214	0.00280666	0.00775349	0.00326295	0.00530071	0.0102475	0.00575699	0.00583081	0.0107776	0.0062871	-0.01902	-0.01781	-0.01829	-0.01914	-0.01793	-0.01841	-0.01843	-0.01723	-0.0177	0.0218267	0.0255635	0.0215529	0.0244407	0.0281775	0.024167	0.0229198	0.0266666	0.022646
893.129	-0.00664799	-0.00866014	-0.00968716	0.00131259	0.0066487	0.00125469	0.00796058	0.0132967	0.00790268	0.00997273	0.0153088	0.00991483	0.0109998	0.0163359	0.0109419	-0.01903	-0.01782	-0.0183	-0.01913	-0.01792	-0.0184	-0.01844	-0.01723	-0.01771	0.0269906	0.0311167	0.0262027	0.0291027	0.0332288	0.0283148	0.0281531	0.0322792	0.0273652
894.093	-0.00665907	-0.00831603	-0.00912028	0.00583736	0.0116152	0.00570929	0.0124964	0.0182743	0.0123684	0.0141534	0.0199312	0.0140253	0.0149576	0.0207355	0.0148296	-0.01903	-0.01782	-0.01831	-0.01912	-0.0179	-0.01839	-0.01845	-0.01723	-0.01772	0.0315264	0.0360943	0.0306784	0.0332734	0.0378312	0.0324153	0.0329408	0.0374986	0.0320827
895.057	-0.00670938	-0.00820946	-0.00856703	0.00926512	0.0154216	0.00959298	0.0159745	0.022131	0.0163024	0.0174746	0.0236311	0.0178024	0.0178321	0.0239887	0.01816	-0.01904	-0.01781	-0.01831	-0.01911	-0.01788	-0.01838	-0.01846	-0.01723	-0.01773	0.0350145	0.039941	0.0346124	0.0365846	0.0415111	0.0361824	0.0365549	0.0414814	0.0361527
896.021	-0.00671317	-0.00854379	-0.00849691	0.0100474	0.0168258	0.0121452	0.0167605	0.023539	0.0188583	0.0185912	0.0253696	0.020689	0.0185443	0.0253227	0.0206421	-0.01904	-0.0178	-0.01831	-0.01909	-0.01786	-0.01836	-0.01846	-0.01722	-0.01773	0.0358005	0.041339	0.0371683	0.0376812	0.0432296	0.039049	0.0370012	0.0425397	0.038369
896.986	-0.00665679	-0.00890451	-0.00861234	0.0111347	0.0175084	0.0144531	0.0177915	0.0241652	0.0211099	0.0200392	0.0264129	0.0233577	0.0197471	0.0261207	0.0230655	-0.01903	-0.01779	-0.0183	-0.01907	-0.01783	-0.01834	-0.01846	-0.01721	-0.01772	0.0368215	0.0419552	0.0394099	0.0391092	0.0442429	0.0416977	0.0375322	0.0426559	0.0401106
897.95	-0.00652184	-0.00886583	-0.00892481	0.0161776	0.0189766	0.0177277	0.0226995	0.0254984	0.0242495	0.0250435	0.0278424	0.0265935	0.0251024	0.0279014	0.0266525	-0.01902	-0.01777	-0.01829	-0.01905	-0.0178	-0.01832	-0.01845	-0.0172	-0.01772	0.0417195	0.0432684	0.0425395	0.0440935	0.0456424	0.0449135	0.0418791	0.043428	0.0426991
898.914	-0.00623684	-0.00866498	-0.00897658	0.0215279	0.0205088	0.0208377	0.0277648	0.0267457	0.0270746	0.0301929	0.0291738	0.0295027	0.0305045	0.0294854	0.0298143	-0.01901	-0.01775	-0.01828	-0.01902	-0.01776	-0.01829	-0.01844	-0.01718	-0.0177	0.0467748	0.0444957	0.0453546	0.0492129	0.0469338	0.0477927	0.0465708	0.0442917	0.0451406
899.878	-0.00568798	-0.00845607	-0.00812681	0.0244094	0.0217678	0.02293	0.0300974	0.0274558	0.028618	0.0328655	0.0302239	0.0313861	0.0325362	0.0298946	0.0310568	-0.019	-0.01773	-0.01826	-0.01899	-0.01772	-0.01825	-0.01842	-0.01716	-0.01769	0.0490974	0.0451858	0.046878	0.0518555	0.0479439	0.0496361	0.0491062	0.0452046	0.0468968
900.843	-0.00498391	-0.00806275	-0.00693635	0.0258565	0.0231081	0.0243817	0.0308404	0.028092	0.0293656	0.0339193	0.0311709	0.0324444	0.0327929	0.0300445	0.031318	-0.01897	-0.0177	-0.01824	-0.01895	-0.01768	-0.01822	-0.01841	-0.01713	-0.01767	0.0498104	0.045792	0.0476056	0.0528693	0.0488509	0.0506644	0.0502768	0.0462484	0.0480619
901.807	-0.00409645	-0.007335	-0.00567107	0.0254433	0.0247466	0.0250264	0.0295398	0.028843	0.0291228	0.0327783	0.0320816	0.0323614	0.0311144	0.0304176	0.0306974	-0.01895	-0.01766	-0.01821	-0.01891	-0.01763	-0.01817	-0.01838	-0.0171	-0.01765	0.0484898	0.046503	0.0473328	0.0516883	0.0497116	0.0505314	0.0494689	0.0474922	0.048322
902.771	-0.00332232	-0.006348	-0.00457505	0.0247749	0.0267592	0.025641	0.0280972	0.0300815	0.0289633	0.0311229	0.0331072	0.031989	0.02935	0.0313342	0.0302161	-0.01892	-0.01763	-0.01818	-0.01887	-0.01757	-0.01813	-0.01836	-0.01706	-0.01762	0.0470172	0.0477115	0.0471433	0.0499929	0.0506772	0.050119	0.0482868	0.0489711	0.0484129
903.735	-0.00311872	-0.00508029	-0.0041896	0.0255877	0.0296003	0.0270364	0.0287064	0.032719	0.0301551	0.030668	0.0346806	0.0321167	0.0297773	0.0337899	0.031226	-0.01889	-0.01759	-0.01815	-0.01882	-0.01752	-0.01808	-0.01833	-0.01702	-0.01759	0.0475964	0.050309	0.0483051	0.049488	0.0522006	0.0501967	0.0483583	0.0510609	0.049067
904.7	-0.0029761	-0.00367186	-0.00388898	0.027062	0.0323517	0.0289448	0.0300381	0.0353278	0.0319209	0.0307339	0.0360235	0.0326167	0.030951	0.0362407	0.0328338	-0.01885	-0.01754	-0.01811	-0.01877	-0.01746	-0.01802	-0.01829	-0.01698	-0.01755	0.0488881	0.0528678	0.0500309	0.0495039	0.0534835	0.0506367	0.0488786	0.0528583	0.0500214
905.664	-0.00259483	-0.00231019	-0.00330229	0.0289796	0.0340081	0.0315821	0.0315744	0.0366029	0.034177	0.0312898	0.0363183	0.0338923	0.0322819	0.0373104	0.0348844	-0.01881	-0.01749	-0.01806	-0.01871	-0.01739	-0.01797	-0.01825	-0.01693	-0.01751	0.0503844	0.0540929	0.052237	0.0499998	0.0537083	0.0518623	0.0496907	0.0533991	0.0515532
906.628	-0.00180244	-0.000831312	-0.0022063	0.0312727	0.0352851	0.0343082	0.0330751	0.0370875	0.0361107	0.032104	0.0361164	0.0351395	0.033479	0.0374914	0.0365145	-0.01876	-0.01744	-0.01802	-0.01865	-0.01732	-0.0179	-0.01821	-0.01688	-0.01746	0.0518351	0.0545275	0.0541307	0.050754	0.0534364	0.0530395	0.050529	0.0532114	0.0528145
907.592	-0.000364248	0.000636098	-0.000363549	0.0337597	0.0363136	0.0364775	0.0341239	0.0366779	0.0368417	0.0331236	0.0356775	0.0358414	0.0341232	0.0366772	0.036841	-0.01872	-0.01738	-0.01797	-0.01859	-0.01725	-0.01784	-0.01817	-0.01683	-0.01742	0.0528439	0.0540579	0.0548117	0.0517136	0.0529275	0.0536814	0.0512025	0.0524164	0.0531703
908.557	0.00183275	0.00278255	0.00255428	0.0365636	0.0378426	0.038322	0.0347309	0.0360099	0.0364893	0.0337811	0.0350601	0.0355395	0.0340093	0.0352883	0.0357678	-0.01866	-0.01731	-0.01791	-0.01852	-0.01717	-0.01777	-0.01811	-0.01677	-0.01736	0.0533909	0.0533199	0.0543993	0.0523011	0.0522301	0.0533095	0.0513009	0.0512399	0.0523094
909.521	0.0047236	0.0058848	0.00648703	0.0401264	0.0412314	0.0393373	0.0354028	0.0365078	0.0346137	0.0342416	0.0353466	0.0334525	0.0336394	0.0347443	0.0328503	-0.0186	-0.01725	-0.01785	-0.01844	-0.01709	-0.01769	-0.01806	-0.0167	-0.01731	0.0540028	0.0537578	0.0524637	0.0526816	0.0524366	0.0511425	0.0510417	0.0507866	0.0495026
910.485	0.00907687	0.0110554	0.0128375	0.0433094	0.0447795	0.0410876	0.0342325	0.0357027	0.0320107	0.032254	0.0337241	0.0300322	0.0304719	0.031942	0.0282501	-0.01854	-0.01718	-0.01779	-0.01837	-0.017	-0.01761	-0.018	-0.01663	-0.01725	0.0527725	0.0528827	0.0498007	0.050624	0.0507241	0.0476422	0.0484814	0.0485815	0.0455096
911.449	0.0153617	0.0193691	0.0225441	0.0446926	0.0469786	0.0460305	0.0293309	0.0316169	0.0306688	0.0253235	0.0276095	0.0266614	0.0221485	0.0244346	0.0234865	-0.01848	-0.0171	-0.01772	-0.01829	-0.01691	-0.01753	-0.01794	-0.01656	-0.01718	0.0478109	0.0487169	0.0483888	0.0436135	0.0445195	0.0441914	0.0416837	0.0425897	0.0422616
912.413	0.0244113	0.0312161	0.0369402	0.0455619	0.0486123	0.0509811	0.0211506	0.024201	0.0265699	0.0143459	0.0173962	0.0197651	0.00862171	0.0116721	0.0140409	-0.01841	-0.01702	-0.01765	-0.0182	-0.01682	-0.01744	-0.01787	-0.01649	-0.01711	0.0395606	0.041221	0.0442199	0.0325459	0.0342162	0.0372051	0.0308957	0.0325661	0.0355549
913.378	0.0379093	0.0481911	0.0592525	0.0468351	0.0501865	0.0532644	0.00892584	0.0122773	0.0153551	-0.00135593	0.00199549	0.00507332	-0.0124174	-0.00906596	-0.00598813	-0.01833	-0.01694	-0.01757	-0.01811	-0.01672	-0.01735	-0.0178	-0.01641	-0.01704	0.0272558	0.0292173	0.0329251	0.0167541	0.0187155	0.0224233	0.0146198	0.0165812	0.0202891
914.342	0.053773	0.0677546	0.0847407	0.048197	0.0510253	0.0538083	-0.00557598	-0.00274767	3.53198e-05	-0.0195577	-0.0167294	-0.0139464	-0.0365438	-0.0337154	-0.0309325	-0.01826	-0.01685	-0.01749	-0.01802	-0.01662	-0.01725	-0.01773	-0.01632	-0.01696	0.012684	0.0141023	0.0175253	-0.00153767	-0.000109363	0.00330363	-0.00379559	-0.00237728	0.00104571
915.306	0.0715759	0.0893221	0.111185	0.0502392	0.0506393	0.0525286	-0.0213367	-0.0209366	-0.0190473	-0.0390829	-0.0386828	-0.0367935	-0.0609462	-0.0605461	-0.0586568	-0.01817	-0.01676	-0.01741	-0.01792	-0.01651	-0.01716	-0.01765	-0.01623	-0.01688	-0.00316672	-0.00417659	-0.00163728	-0.0211629	-0.0221728	-0.0196335	-0.0220742	-0.0230941	-0.0205548
916.27	0.0880328	0.108624	0.134251	0.0511589	0.048974	0.0497871	-0.0368739	-0.0390588	-0.0382457	-0.0574654	-0.0596503	-0.0588371	-0.0830921	-0.085277	-0.0844639	-0.01809	-0.01666	-0.01732	-0.01782	-0.0164	-0.01705	-0.01756	-0.01614	-0.01679	-0.0187839	-0.0223988	-0.0209257	-0.0396454	-0.0432503	-0.0417871	-0.038537	-0.0421419	-0.0406787
917.235	0.100009	0.121381	0.148927	0.0491944	0.0457466	0.0461017	-0.0508149	-0.0542626	-0.0539076	-0.0721866	-0.0756344	-0.0752793	-0.0997326	-0.10318	-0.102825	-0.018	-0.01656	-0.01722	-0.01772	-0.01628	-0.01694	-0.01748	-0.01604	-0.0167	-0.0328149	-0.0377026	-0.0366876	-0.0544666	-0.0593544	-0.0583393	-0.0508629	-0.0557506	-0.0547356
918.199	0.106626	0.12704	0.155019	0.0448137	0.0411519	0.0409195	-0.0618122	-0.065474	-0.0657064	-0.0822261	-0.0858879	-0.0861203	-0.110205	-0.113867	-0.114099	-0.0179	-0.01646	-0.01713	-0.01761	-0.01616	-0.01683	-0.01738	-0.01594	-0.01661	-0.0439122	-0.049014	-0.0485764	-0.0646161	-0.0697279	-0.0692903	-0.0586612	-0.063763	-0.0633255
919.163	0.105366	0.122635	0.149649	0.0373555	0.0351936	0.0335382	-0.0680105	-0.0701724	-0.0718278	-0.0852796	-0.0874415	-0.0890969	-0.112293	-0.114455	-0.116111	-0.0178	-0.01635	-0.01702	-0.01749	-0.01604	-0.01671	-0.01729	-0.01583	-0.01651	-0.0502105	-0.0538224	-0.0548078	-0.0677896	-0.0714015	-0.0723869	-0.0603586	-0.0639806	-0.064956
920.127	0.0980073	0.111126	0.135856	0.0284468	0.0281615	0.0249246	-0.0695605	-0.0698458	-0.0730828	-0.0826792	-0.0829645	-0.0862014	-0.107409	-0.107695	-0.110932	-0.0177	-0.01624	-0.01692	-0.01738	-0.01591	-0.01659	-0.01719	-0.01572	-0.01641	-0.0518605	-0.0536058	-0.0561628	-0.0652992	-0.0670545	-0.0696114	-0.0570426	-0.0587978	-0.0613448
921.092	0.0844984	0.093271	0.114311	0.0191629	0.0201016	0.0153127	-0.0653355	-0.0643968	-0.0691857	-0.0741081	-0.0731694	-0.0779583	-0.095148	-0.0942093	-0.0989982	-0.01759	-0.01612	-0.01681	-0.01725	-0.01578	-0.01647	-0.01708	-0.01561	-0.0163	-0.0477455	-0.0482768	-0.0523757	-0.0568581	-0.0573894	-0.0614883	-0.0484731	-0.0490044	-0.0531033
922.056	0.0678103	0.0727073	0.0892424	0.0104979	0.0117505	0.00619876	-0.0573124	-0.0560598	-0.0616115	-0.0622094	-0.0609568	-0.0665085	-0.0787445	-0.0774919	-0.0830436	-0.01748	-0.016	-0.0167	-0.01713	-0.01564	-0.01634	-0.01698	-0.01549	-0.01619	-0.0398324	-0.0400598	-0.0449115	-0.0450794	-0.0453168	-0.0501685	-0.0370101	-0.0372476	-0.0420993
923.02	0.0502325	0.0529065	0.0642739	0.00406765	0.00357457	-0.000859811	-0.0461648	-0.0466579	-0.0510923	-0.0488388	-0.0493319	-0.0537663	-0.0602063	-0.0606994	-0.0651337	-0.01737	-0.01587	-0.01658	-0.017	-0.0155	-0.01621	-0.01686	-0.01537	-0.01607	-0.0287948	-0.0307879	-0.0345123	-0.0318388	-0.0338319	-0.0375563	-0.0241959	-0.026179	-0.0299133
923.984	0.0337582	0.0351238	0.041894	-0.0009178	-0.0035698	-0.0058124	-0.0346761	-0.037328	-0.0395707	-0.0360416	-0.0386936	-0.0409362	-0.0428118	-0.0454638	-0.0477064	-0.01725	-0.01574	-0.01645	-0.01686	-0.01536	-0.01607	-0.01675	-0.01524	-0.01595	-0.0174261	-0.021588	-0.0231207	-0.0191816	-0.0233336	-0.0248662	-0.0123635	-0.0165255	-0.0180581
924.948	0.021419	0.0222972	0.0266501	-0.00442175	-0.00815767	-0.00692706	-0.0258408	-0.0295767	-0.0283461	-0.0267189	-0.0304549	-0.0292242	-0.0310718	-0.0348077	-0.0335771	-0.01712	-0.01561	-0.01633	-0.01673	-0.01521	-0.01593	-0.01663	-0.01511	-0.01583	-0.00872079	-0.0139667	-0.0120161	-0.00998894	-0.0152449	-0.0132942	-0.00488306	-0.010139	-0.00818837
925.913	0.0123894	0.0128491	0.0159878	-0.00730843	-0.0117286	-0.00769039	-0.0196979	-0.024118	-0.0200798	-0.0201576	-0.0245777	-0.0205395	-0.0232963	-0.0277164	-0.0236782	-0.017	-0.01547	-0.0162	-0.01658	-0.01506	-0.01578	-0.0165	-0.01498	-0.0157	-0.00269787	-0.00864805	-0.00387982	-0.00357756	-0.00951775	-0.00475952	-0.000306698	-0.00624688	-0.00148865
926.877	0.0075547	0.00638286	0.00941241	-0.0103396	-0.015741	-0.0121902	-0.0178943	-0.0232957	-0.0197449	-0.0167225	-0.0221238	-0.0185731	-0.0197521	-0.0251534	-0.0216026	-0.01687	-0.01533	-0.01606	-0.01644	-0.0149	-0.01563	-0.01638	-0.01484	-0.01557	-0.00102435	-0.00796568	-0.00368492	-0.000282509	-0.00722384	-0.00294308	0.00163012	-0.00531121	-0.00103046
927.841	0.00481416	0.00229368	0.00529279	-0.013786	-0.0189134	-0.0168909	-0.0186002	-0.0237276	-0.0217051	-0.0160797	-0.0212071	-0.0191846	-0.0190788	-0.0242062	-0.0221837	-0.01673	-0.01518	-0.01592	-0.01629	-0.01474	-0.01548	-0.01624	-0.0147	-0.01544	-0.00187017	-0.00854756	-0.0057851	0.000210316	-0.00646708	-0.00370462	0.00115701	-0.00551039	-0.00274793
928.805	0.00215656	8.80487e-05	0.00167626	-0.0187473	-0.0199195	-0.0193196	-0.0209038	-0.022076	-0.0214761	-0.0188353	-0.0200075	-0.0194076	-0.0204235	-0.0215957	-0.0209958	-0.01659	-0.01503	-0.01578	-0.01613	-0.01457	-0.01532	-0.01611	-0.01455	-0.0153	-0.00431382	-0.00704604	-0.00569614	-0.00270531	-0.00543753	-0.00408763	-0.00209504	-0.00482726	-0.00347736
929.77	0.000198915	-0.000964234	-0.000967051	-0.0234977	-0.0203526	-0.0203761	-0.0236966	-0.0205515	-0.020575	-0.0225334	-0.0193884	-0.0194118	-0.0225306	-0.0193856	-0.019409	-0.01645	-0.01488	-0.01563	-0.01597	-0.01441	-0.01516	-0.01597	-0.0144	-0.01515	-0.00724658	-0.00567153	-0.00494497	-0.00656343	-0.00497838	-0.00425182	-0.00592545	-0.0043504	-0.00362385
930.734	-0.00100926	-0.00168555	-0.00269912	-0.0265745	-0.0216223	-0.0195604	-0.0255653	-0.020613	-0.0185511	-0.024889	-0.0199367	-0.0178748	-0.0238754	-0.0189232	-0.0168613	-0.0163	-0.01472	-0.01548	-0.01581	-0.01423	-0.01499	-0.01582	-0.01424	-0.015	-0.00926528	-0.00589303	-0.00307111	-0.00907898	-0.00570674	-0.00288482	-0.00808676	-0.00471452	-0.0018926
931.698	-0.00177673	-0.00229291	-0.00387641	-0.0282885	-0.0229538	-0.0185995	-0.0265118	-0.0211771	-0.0168228	-0.0259956	-0.0206609	-0.0163066	-0.0244121	-0.0190774	-0.0147231	-0.01615	-0.01456	-0.01532	-0.01564	-0.01406	-0.01482	-0.01567	-0.01408	-0.01485	-0.0103618	-0.00661709	-0.00150277	-0.0103556	-0.00660091	-0.00148659	-0.00904873	-0.00530403	-0.000179712
932.662	-0.00241562	-0.00347074	-0.00486639	-0.0281943	-0.0241358	-0.0193738	-0.0257787	-0.0217202	-0.0169582	-0.0247236	-0.0206651	-0.0159031	-0.0233279	-0.0192694	-0.0145074	-0.01599	-0.01439	-0.01516	-0.01547	-0.01387	-0.01465	-0.01552	-0.01392	-0.01469	-0.00978872	-0.00733022	-0.00179818	-0.0092536	-0.0067951	-0.00125306	-0.00825136	-0.00579285	-0.000260816
933.627	-0.00286642	-0.00463911	-0.00569798	-0.0270971	-0.0248878	-0.0209231	-0.0242307	-0.0220214	-0.0180567	-0.022458	-0.0202487	-0.016284	-0.0213991	-0.0191898	-0.0152251	-0.01583	-0.01422	-0.015	-0.0153	-0.01369	-0.01447	-0.01536	-0.01375	-0.01453	-0.00840069	-0.00780142	-0.00305671	-0.007158	-0.00655872	-0.00181401	-0.00657642	-0.00597715	-0.00123244
934.591	-0.00313395	-0.00540687	-0.00658904	-0.0255342	-0.0247991	-0.0232584	-0.0224002	-0.0216652	-0.0201244	-0.0201273	-0.0193923	-0.0178515	-0.0189451	-0.0182101	-0.0166693	-0.01567	-0.01404	-0.01483	-0.01512	-0.0135	-0.01429	-0.0152	-0.01358	-0.01437	-0.00673023	-0.00762518	-0.00529441	-0.00500731	-0.00589226	-0.00356148	-0.00457456	-0.00545951	-0.00312874
935.555	-0.00333738	-0.00589215	-0.00734019	-0.0238636	-0.0240489	-0.0253469	-0.0205262	-0.0207115	-0.0220095	-0.0179714	-0.0181567	-0.0194548	-0.0165234	-0.0167087	-0.0180067	-0.0155	-0.01386	-0.01466	-0.01494	-0.0133	-0.0141	-0.01504	-0.0134	-0.0142	-0.00502619	-0.0068515	-0.00734954	-0.00303142	-0.00485673	-0.00535476	-0.00261919	-0.0044445	-0.00494254
936.519	-0.00354228	-0.00588376	-0.00785028	-0.0226862	-0.0225382	-0.0260436	-0.0191439	-0.0189959	-0.0225014	-0.0168025	-0.0166544	-0.0201599	-0.0148359	-0.0146879	-0.0181934	-0.01532	-0.01368	-0.01448	-0.01475	-0.01311	-0.01391	-0.01487	-0.01322	-0.01403	-0.00382395	-0.00531588	-0.00802136	-0.00205246	-0.0035444	-0.00624987	-0.00135523	-0.00285716	-0.00555264
937.484	-0.00391426	-0.00597857	-0.00804252	-0.0218109	-0.0206905	-0.0256972	-0.0178967	-0.0167762	-0.0217829	-0.0158323	-0.0147119	-0.0197186	-0.0137684	-0.012648	-0.0176547	-0.01515	-0.01349	-0.0143	-0.01456	-0.01291	-0.01371	-0.0147	-0.01304	-0.01385	-0.00274666	-0.00328623	-0.00748292	-0.00127235	-0.00180192	-0.00600861	-0.000548969	-0.00108855	-0.00528523
938.448	-0.00488863	-0.00712269	-0.00763558	-0.0211718	-0.018784	-0.0240297	-0.0162832	-0.0138954	-0.0191411	-0.0140491	-0.0116613	-0.016907	-0.0135362	-0.0111484	-0.0163941	-0.01497	-0.0133	-0.01412	-0.01437	-0.0127	-0.01351	-0.01452	-0.01285	-0.01367	-0.0013132	-0.000595389	-0.00502105	0.000320857	0.00103867	-0.00339699	-0.000177907	0.000539908	-0.00388575
939.412	-0.00572184	-0.00805717	-0.00714194	-0.0209937	-0.0171559	-0.0217755	-0.0152718	-0.011434	-0.0160537	-0.0129365	-0.0090987	-0.0137183	-0.0138517	-0.0100139	-0.0146336	-0.01478	-0.01311	-0.01393	-0.01417	-0.01249	-0.01331	-0.01434	-0.01266	-0.01348	-0.000491848	0.00167597	-0.00212367	0.00123348	0.0033913	-0.000408346	-0.000293457	0.00186436	-0.00193528
940.376	-0.00566135	-0.00737237	-0.00719547	-0.0220086	-0.0165612	-0.0194446	-0.0163473	-0.0108999	-0.0137832	-0.0146363	-0.00918888	-0.0120722	-0.0148132	-0.00936577	-0.0122491	-0.0146	-0.01291	-0.01374	-0.01396	-0.01228	-0.0131	-0.01415	-0.01246	-0.01329	-0.0017473	0.0020101	-4.32335e-05	-0.000676279	0.00309112	0.00102779	-0.00139866	0.00235874	0.000305405
941.341	-0.00516951	-0.00646645	-0.00715065	-0.0226286	-0.0160241	-0.0174325	-0.0174591	-0.0108546	-0.012263	-0.0161622	-0.00955767	-0.010966	-0.015478	-0.00887346	-0.0102818	-0.0144	-0.0127	-0.01354	-0.01376	-0.01206	-0.01289	-0.01396	-0.01226	-0.0131	-0.00305912	0.00184539	0.00127703	-0.00240218	0.00250233	0.00192397	-0.0021562	0.00274831	0.00217995
942.305	-0.00454587	-0.00678341	-0.00658971	-0.0211206	-0.0146927	-0.0168863	-0.0165748	-0.0101468	-0.0123405	-0.0143372	-0.00790925	-0.0101029	-0.0145309	-0.00810295	-0.0102966	-0.01421	-0.0125	-0.01334	-0.01355	-0.01184	-0.01268	-0.01377	-0.01206	-0.0129	-0.00236477	0.00235321	0.000999545	-0.000787232	0.00393075	0.00257708	-0.000843084	0.0038749	0.00252123
943.269	-0.00352637	-0.00677604	-0.00546329	-0.0186516	-0.0129495	-0.0160616	-0.0151253	-0.00942316	-0.0125352	-0.0118756	-0.00617349	-0.00928552	-0.0131883	-0.00748624	-0.0105983	-0.01401	-0.01228	-0.01313	-0.01333	-0.01161	-0.01246	-0.01357	-0.01185	-0.0127	-0.00111526	0.00285684	0.000594809	0.00145441	0.00543651	0.00317448	0.000850626	0.00483273	0.0025707
944.233	-0.00190264	-0.0051293	-0.00357015	-0.0156025	-0.0106972	-0.0130681	-0.0136999	-0.00879456	-0.0111654	-0.0104732	-0.00556791	-0.00793876	-0.0120324	-0.00712705	-0.0094979	-0.0138	-0.01207	-0.01292	-0.01311	-0.01138	-0.01224	-0.01337	-0.01164	-0.0125	0.000100127	0.00327544	0.00175459	0.00263678	0.00581209	0.00430124	0.00183301	0.00500832	0.00349747
945.197	0.000192941	-0.00259069	-0.000948229	-0.0125985	-0.00852424	-0.00948954	-0.0127914	-0.00871718	-0.00968248	-0.0100078	-0.00593355	-0.00689885	-0.0116503	-0.00757601	-0.00854131	-0.01359	-0.01185	-0.01271	-0.01289	-0.01115	-0.01201	-0.01317	-0.01142	-0.01229	0.00079858	0.00313282	0.00302752	0.00288221	0.00521645	0.00511115	0.00209255	0.00441679	0.00432148
946.162	0.00281794	0.000770043	0.00265924	-0.0104078	-0.00706526	-0.00614883	-0.0132258	-0.00988321	-0.00896677	-0.0111779	-0.00783531	-0.00691887	-0.0130671	-0.00972451	-0.00880807	-0.01338	-0.01162	-0.01249	-0.01267	-0.01091	-0.01178	-0.01296	-0.0112	-0.01207	0.000154237	0.00173679	0.00352323	0.00149214	0.00307469	0.00486113	0.00106136	0.00264391	0.00443035
947.126	0.00561094	0.00423466	0.0065695	-0.00898218	-0.0060845	-0.00343859	-0.0145931	-0.0116954	-0.00904953	-0.0132168	-0.0103192	-0.00767325	-0.0155517	-0.012654	-0.0100081	-0.01317	-0.0114	-0.01227	-0.01243	-0.01067	-0.01154	-0.01275	-0.01098	-0.01185	-0.00142312	-0.000295438	0.00322047	-0.000786838	0.000350847	0.00386675	-0.000713367	0.000414318	0.00393022
948.09	0.00836859	0.0071591	0.0103611	-0.00871838	-0.00560005	-0.00213649	-0.017087	-0.0139686	-0.0105051	-0.0158775	-0.0127592	-0.00929559	-0.0190795	-0.0159612	-0.0124976	-0.01295	-0.01116	-0.01205	-0.0122	-0.01042	-0.0113	-0.01253	-0.01075	-0.01163	-0.00413698	-0.00280864	0.00154492	-0.00367748	-0.00233915	0.00200441	-0.00312567	-0.00178734	0.00255622
949.054	0.0106742	0.00925106	0.0135068	-0.00904913	-0.00548486	-0.00191042	-0.0197233	-0.0161591	-0.0125846	-0.0183002	-0.0147359	-0.0111615	-0.0225559	-0.0189916	-0.0154172	-0.01272	-0.01093	-0.01182	-0.01196	-0.01017	-0.01106	-0.01231	-0.01052	-0.01141	-0.00700334	-0.00522906	-0.000764622	-0.0063402	-0.00456592	-0.000101478	-0.00545963	-0.00368535	0.000779093
950.019	0.0120771	0.00991136	0.0153308	-0.00964564	-0.00558929	-0.00286993	-0.0217228	-0.0176664	-0.014947	-0.019557	-0.0155006	-0.0127813	-0.0249765	-0.0209201	-0.0182007	-0.01249	-0.01069	-0.01159	-0.01172	-0.00992	-0.01081	-0.01209	-0.01028	-0.01118	-0.00923275	-0.0069764	-0.00335704	-0.007837	-0.00558065	-0.00197128	-0.0070176	-0.00477125	-0.00115188
950.983	0.0124759	0.00941656	0.0158564	-0.0101892	-0.00599913	-0.00446761	-0.0226652	-0.0184751	-0.0169436	-0.0196058	-0.0154157	-0.0138842	-0.0260456	-0.0218556	-0.020324	-0.01226	-0.01045	-0.01135	-0.01148	-0.00966	-0.01056	-0.01186	-0.01004	-0.01095	-0.0104052	-0.00802508	-0.00559355	-0.00812579	-0.00575569	-0.00332417	-0.00766873	-0.00529863	-0.00285711
951.947	0.0114531	0.00763292	0.0146898	-0.0100471	-0.00676496	-0.00625159	-0.0215002	-0.018218	-0.0177047	-0.01768	-0.0143979	-0.0138845	-0.0247369	-0.0214548	-0.0209414	-0.01203	-0.0102	-0.01111	-0.01123	-0.0094	-0.01031	-0.01163	-0.0098	-0.01071	-0.00947015	-0.00801804	-0.00659466	-0.00644999	-0.00499788	-0.0035745	-0.00673661	-0.0052845	-0.00386112
952.911	0.0095067	0.00519219	0.0124064	-0.00983286	-0.00784276	-0.0080448	-0.0193396	-0.0173495	-0.0175515	-0.0150251	-0.013035	-0.013237	-0.0222393	-0.0202492	-0.0204512	-0.01179	-0.00995	-0.01086	-0.01097	-0.00913	-0.01005	-0.01139	-0.00955	-0.01047	-0.00754956	-0.00739946	-0.0066915	-0.00405505	-0.00390496	-0.00318699	-0.0051103	-0.0049602	-0.00424223
953.875	0.00677819	0.00255217	0.00927981	-0.00980801	-0.00938669	-0.00943956	-0.0165862	-0.0161649	-0.0162177	-0.0123602	-0.0119389	-0.0119917	-0.0190878	-0.0186665	-0.0187194	-0.01154	-0.00969	-0.01061	-0.01072	-0.00886	-0.00979	-0.01115	-0.0093	-0.01022	-0.0050462	-0.00647489	-0.00560775	-0.00164018	-0.00307887	-0.00220173	-0.00322317	-0.00465186	-0.00378472
954.84	0.00392046	0.00010103	0.0058219	-0.0103965	-0.0108528	-0.0106758	-0.0143169	-0.0147733	-0.0145963	-0.0104975	-0.0109539	-0.0107769	-0.0162184	-0.0166747	-0.0164977	-0.0113	-0.00943	-0.01036	-0.01046	-0.00859	-0.00952	-0.01091	-0.00905	-0.00997	-0.00301692	-0.00534329	-0.00423628	-3.7494e-05	-0.00236386	-0.00125685	-0.00171581	-0.00403218	-0.00293517
955.804	0.00177346	-0.00141298	0.0025132	-0.0128258	-0.0115713	-0.0116995	-0.0145993	-0.0133448	-0.013473	-0.0114129	-0.0101583	-0.0102866	-0.015339	-0.0140845	-0.0142127	-0.01105	-0.00917	-0.01011	-0.01019	-0.00831	-0.00925	-0.01066	-0.00879	-0.00972	-0.0035493	-0.00417476	-0.003363	-0.00122286	-0.00184833	-0.00103657	-0.00205121	-0.00266667	-0.00186491
956.768	-8.26596e-05	-0.00261235	-0.000278727	-0.0149466	-0.0120741	-0.0129851	-0.0148639	-0.0119915	-0.0129024	-0.0123342	-0.00946179	-0.0103727	-0.0146679	-0.0117954	-0.0127063	-0.01079	-0.0089	-0.00985	-0.00992	-0.00803	-0.00898	-0.01041	-0.00852	-0.00947	-0.00407392	-0.00309149	-0.0030524	-0.00241423	-0.00143179	-0.00139271	-0.00222555	-0.00124311	-0.00120402
957.732	-0.00182552	-0.00391539	-0.00171936	-0.0142839	-0.0126178	-0.0156219	-0.0124584	-0.0107923	-0.0137963	-0.0103685	-0.00870241	-0.0117065	-0.0125646	-0.0108984	-0.0139025	-0.01053	-0.00863	-0.00958	-0.00965	-0.00775	-0.0087	-0.01016	-0.00826	-0.00921	-0.00192841	-0.00216229	-0.00421634	-0.000718535	-0.000952411	-0.00300646	-4.46894e-05	-0.000278566	-0.00233262
958.697	-0.00334188	-0.00518652	-0.002729	-0.0130412	-0.0133592	-0.0177105	-0.00969934	-0.0100173	-0.0143686	-0.0078547	-0.00817267	-0.0125239	-0.0103122	-0.0106302	-0.0149815	-0.01027	-0.00836	-0.00932	-0.00938	-0.00746	-0.00842	-0.0099	-0.00799	-0.00894	0.000570658	-0.00165731	-0.00504859	0.0015253	-0.00071267	-0.00410395	0.00242733	0.000199363	-0.00320191
959.661	-0.00459187	-0.00660251	-0.00396052	-0.0126402	-0.0147262	-0.0170993	-0.00804829	-0.0101343	-0.0125074	-0.00603765	-0.00812365	-0.0104968	-0.00867964	-0.0107656	-0.0131388	-0.01001	-0.00808	-0.00904	-0.0091	-0.00717	-0.00813	-0.00964	-0.00771	-0.00867	0.00196171	-0.00205429	-0.00346742	0.00306235	-0.000953654	-0.00236678	0.00394793	-6.80754e-05	-0.0014812
960.625	-0.00553304	-0.0076446	-0.00538165	-0.0129509	-0.0161623	-0.0156342	-0.00741782	-0.0106293	-0.0101012	-0.00530626	-0.0085177	-0.00798965	-0.00756922	-0.0107807	-0.0102526	-0.00974	-0.0078	-0.00877	-0.00881	-0.00688	-0.00784	-0.00937	-0.00743	-0.0084	0.00232218	-0.00282926	-0.0013312	0.00350374	-0.0016377	-0.000149645	0.00429696	-0.000854472	0.000643583
961.589	-0.00611769	-0.0076061	-0.00744653	-0.014701	-0.0172246	-0.0143933	-0.00858334	-0.0111069	-0.00827562	-0.00709493	-0.00961848	-0.00678722	-0.0072545	-0.00977805	-0.00694679	-0.00946	-0.00752	-0.00849	-0.00853	-0.00658	-0.00755	-0.0091	-0.00715	-0.00813	0.000876663	-0.00358689	0.000214375	0.00143507	-0.00303848	0.000762783	0.00229829	-0.00217526	0.00163601
962.554	-0.00632163	-0.00722747	-0.00934873	-0.0167396	-0.0180004	-0.0135286	-0.010418	-0.0116788	-0.00720701	-0.00951212	-0.010773	-0.00630117	-0.00739086	-0.00865172	-0.00417991	-0.00919	-0.00723	-0.00821	-0.00824	-0.00627	-0.00726	-0.00883	-0.00687	-0.00785	-0.00122796	-0.00444882	0.00100299	-0.00127212	-0.00450298	0.000958831	-0.000372714	-0.00359357	0.00185824
963.518	-0.00604667	-0.00702821	-0.0104745	-0.01814	-0.0183783	-0.0136912	-0.0120933	-0.0123317	-0.00764458	-0.0111118	-0.0113501	-0.00666304	-0.00766548	-0.00790383	-0.00321673	-0.00891	-0.00693	-0.00792	-0.00794	-0.00597	-0.00696	-0.00855	-0.00658	-0.00757	-0.00318333	-0.00540168	0.000275417	-0.00317179	-0.00538014	0.000296958	-0.0024193	-0.00462765	0.00104945
964.482	-0.00546713	-0.00696456	-0.0106999	-0.0189564	-0.0185124	-0.0144624	-0.0134893	-0.0130453	-0.00899527	-0.0119919	-0.0115479	-0.00749785	-0.00825649	-0.00781247	-0.00376247	-0.00862	-0.00664	-0.00763	-0.00764	-0.00566	-0.00665	-0.00827	-0.00629	-0.00728	-0.00486929	-0.00640527	-0.00136527	-0.00435187	-0.00588785	-0.000847847	-0.00391174	-0.00544772	-0.000407718
965.446	-0.00469676	-0.00752109	-0.00941233	-0.0185792	-0.018517	-0.0156405	-0.0138825	-0.0138202	-0.0109438	-0.0110582	-0.0109959	-0.00811945	-0.00916691	-0.00910464	-0.00622821	-0.00834	-0.00634	-0.00734	-0.00734	-0.00534	-0.00635	-0.00799	-0.00599	-0.00699	-0.00554248	-0.00748021	-0.00360377	-0.00371815	-0.00565588	-0.00176945	-0.00389516	-0.00583288	-0.00195645
966.41	-0.00381919	-0.00763228	-0.00746399	-0.0180733	-0.0183999	-0.017225	-0.0142542	-0.0145807	-0.0134058	-0.0104411	-0.0107676	-0.00959274	-0.0106094	-0.0109359	-0.00976104	-0.00805	-0.00603	-0.00704	-0.00704	-0.00503	-0.00603	-0.0077	-0.00569	-0.0067	-0.00620416	-0.00855071	-0.00636583	-0.00340106	-0.00573762	-0.00356274	-0.00417833	-0.00651488	-0.00433001
967.375	-0.00323055	-0.00600419	-0.00552208	-0.0189265	-0.018014	-0.0192457	-0.015696	-0.0147835	-0.0160152	-0.0129224	-0.0120098	-0.0132415	-0.0134045	-0.0124919	-0.0137236	-0.00775	-0.00573	-0.00674	-0.00673	-0.00471	-0.00572	-0.00741	-0.00539	-0.0064	-0.00794599	-0.00905346	-0.00927515	-0.00619236	-0.00729982	-0.00752151	-0.00714017	-0.00824764	-0.00846933
968.339	-0.00210714	-0.00380667	-0.00352933	-0.0192606	-0.0179389	-0.0214096	-0.0171535	-0.0158318	-0.0193024	-0.015454	-0.0141322	-0.0176029	-0.0157313	-0.0144096	-0.0178803	-0.00745	-0.00542	-0.00644	-0.00642	-0.00438	-0.0054	-0.00712	-0.00508	-0.0061	-0.0097035	-0.0104118	-0.0128624	-0.00903397	-0.00975223	-0.0122029	-0.0100555	-0.0107738	-0.0132245
969.303	0.00091846	-0.00177155	-0.00163211	-0.0165143	-0.0190639	-0.0238392	-0.0174328	-0.0199824	-0.0247576	-0.0147428	-0.0172924	-0.0220676	-0.0148822	-0.0174318	-0.0222071	-0.00715	-0.0051	-0.00613	-0.0061	-0.00406	-0.00508	-0.00682	-0.00477	-0.0058	-0.0102828	-0.0148824	-0.0186276	-0.00864277	-0.0132324	-0.0169876	-0.00992381	-0.0145234	-0.0182687
970.268	0.00381889	8.09449e-05	0.000113349	-0.0142249	-0.0203127	-0.0253179	-0.0180438	-0.0241316	-0.0291368	-0.0143058	-0.0203936	-0.0253989	-0.0143382	-0.020426	-0.0254313	-0.00685	-0.00479	-0.00582	-0.00579	-0.00372	-0.00476	-0.00652	-0.00446	-0.00549	-0.0111938	-0.0193416	-0.0233168	-0.00851583	-0.0166736	-0.0206389	-0.00998022	-0.018128	-0.0221033
971.232	0.00461999	0.00168531	0.00194406	-0.0162499	-0.0208665	-0.0239278	-0.0208699	-0.0254865	-0.0285478	-0.0179352	-0.0225518	-0.0256131	-0.018194	-0.0228106	-0.0258719	-0.00654	-0.00446	-0.0055	-0.00546	-0.00339	-0.00443	-0.00621	-0.00414	-0.00518	-0.0143299	-0.0210265	-0.0230478	-0.0124752	-0.0191618	-0.0211831	-0.0137425	-0.0204291	-0.0224504
972.196	0.00452959	0.00244548	0.00283393	-0.0190674	-0.0208417	-0.021896	-0.0235969	-0.0253713	-0.0264256	-0.0215128	-0.0232872	-0.0243415	-0.0219013	-0.0236756	-0.0247299	-0.00623	-0.00414	-0.00518	-0.00514	-0.00305	-0.0041	-0.00591	-0.00382	-0.00486	-0.0173669	-0.0212313	-0.0212456	-0.0163728	-0.0202372	-0.0202415	-0.0173922	-0.0212566	-0.0212709
973.16	0.00412817	0.00135001	0.00121427	-0.0200566	-0.0196999	-0.0210096	-0.0241848	-0.0238281	-0.0251378	-0.0214066	-0.0210499	-0.0223596	-0.0212709	-0.0209142	-0.0222239	-0.00591	-0.00381	-0.00486	-0.00481	-0.00271	-0.00376	-0.00559	-0.00349	-0.00454	-0.0182748	-0.0200181	-0.0202778	-0.0165966	-0.0183399	-0.0185996	-0.0176503	-0.0193937	-0.0196534
974.124	0.00332368	-0.000420422	-0.00105005	-0.0203712	-0.0185864	-0.0206706	-0.0236949	-0.02191	-0.0239943	-0.0199508	-0.0181659	-0.0202502	-0.0193211	-0.0175363	-0.0196205	-0.00559	-0.00348	-0.00454	-0.00448	-0.00237	-0.00342	-0.00528	-0.00317	-0.00422	-0.0181049	-0.01843	-0.0194543	-0.0154708	-0.0157959	-0.0168302	-0.0165267	-0.0168519	-0.0178861
975.089	0.00208542	-0.00210633	-0.00253287	-0.0202196	-0.0187905	-0.0211296	-0.022305	-0.0208759	-0.023215	-0.0181133	-0.0166842	-0.0190232	-0.0176867	-0.0162576	-0.0185967	-0.00527	-0.00315	-0.00421	-0.00414	-0.00202	-0.00308	-0.00496	-0.00284	-0.0039	-0.017035	-0.0177259	-0.019005	-0.0139733	-0.0146642	-0.0159432	-0.014774	-0.0154649	-0.016744
976.053	0.000809868	-0.00345553	-0.0034868	-0.0198165	-0.0193413	-0.0216274	-0.0206264	-0.0201512	-0.0224373	-0.016361	-0.0158858	-0.0181719	-0.0163297	-0.0158545	-0.0181406	-0.00495	-0.00281	-0.00388	-0.00381	-0.00167	-0.00274	-0.00464	-0.0025	-0.00357	-0.0156764	-0.0173412	-0.0185573	-0.012551	-0.0142158	-0.0154319	-0.0129951	-0.0146599	-0.0158759
977.017	-0.000152369	-0.00378615	-0.00352689	-0.0194309	-0.0197927	-0.0214266	-0.0192785	-0.0196403	-0.0212742	-0.0156447	-0.0160065	-0.0176404	-0.015904	-0.0162658	-0.0178997	-0.00462	-0.00247	-0.00354	-0.00346	-0.00131	-0.00239	-0.00431	-0.00216	-0.00324	-0.0146585	-0.0171703	-0.0177342	-0.0121847	-0.0146965	-0.0152504	-0.0121087	-0.0146205	-0.0151744
977.981	-0.000694345	-0.00362782	-0.00313962	-0.0191086	-0.0198597	-0.0207128	-0.0184142	-0.0191654	-0.0200185	-0.0154808	-0.0162319	-0.017085	-0.015969	-0.0167201	-0.0175732	-0.00429	-0.00212	-0.0032	-0.00312	-0.000954022	-0.00204	-0.00399	-0.00182	-0.0029	-0.0141242	-0.0170454	-0.0168185	-0.0123608	-0.0152779	-0.015045	-0.0119403	-0.0148614	-0.0146345
978.946	-0.000481599	-0.0031395	-0.00266213	-0.0190318	-0.0189098	-0.0191732	-0.0185502	-0.0184282	-0.0186916	-0.0158923	-0.0157702	-0.0160337	-0.0163697	-0.0162476	-0.016511	-0.00395	-0.00177	-0.00286	-0.00277	-0.000592822	-0.00168	-0.00365	-0.00148	-0.00257	-0.0146002	-0.0166582	-0.0158316	-0.0131223	-0.0151774	-0.0143537	-0.0128904	-0.0149383	-0.0141117
979.91	0.000153929	-0.00275125	-0.00215742	-0.0190613	-0.0175401	-0.0175658	-0.0192152	-0.017694	-0.0177197	-0.01631	-0.0147888	-0.0148146	-0.0169038	-0.0153827	-0.0154084	-0.00361	-0.00142	-0.00252	-0.00242	-0.000228401	-0.00132	-0.00332	-0.00113	-0.00222	-0.0156052	-0.016274	-0.0151997	-0.01389	-0.0145604	-0.0134946	-0.0142626	-0.0149314	-0.0138672
980.874	0.0011485	-0.00309882	-0.00187283	-0.0192096	-0.0159987	-0.0164718	-0.0203581	-0.0171472	-0.0176203	-0.0161108	-0.0128998	-0.013373	-0.0173368	-0.0141258	-0.014599	-0.00327	-0.00107	-0.00217	-0.00206	0.000139251	-0.000961076	-0.00298	-0.000779333	-0.00188	-0.0170881	-0.0160772	-0.0154503	-0.0140508	-0.0130391	-0.012412	-0.0157296	-0.0147193	-0.0140919
981.838	0.00203197	-0.00372404	-0.00159245	-0.0192026	-0.014701	-0.0161094	-0.0212346	-0.016733	-0.0181414	-0.0154786	-0.010977	-0.0123854	-0.0176102	-0.0131086	-0.014517	-0.00293	-0.000710822	-0.00182	-0.00171	0.00051003	-0.000596372	-0.00264	-0.000425356	-0.00153	-0.0183046	-0.0160222	-0.0163214	-0.0137686	-0.011487	-0.011789	-0.0166949	-0.0144079	-0.0147117
982.803	0.00227309	-0.00443495	-0.00100994	-0.0185134	-0.014266	-0.0171433	-0.0207865	-0.0165391	-0.0194164	-0.0140784	-0.00983103	-0.0127084	-0.0175034	-0.013256	-0.0161334	-0.00258	-0.000350121	-0.00146	-0.00135	0.000883946	-0.00022851	-0.0023	-6.82093e-05	-0.00118	-0.0182065	-0.016189	-0.0179564	-0.0127284	-0.010715	-0.0124799	-0.0160666	-0.014051	-0.0158166
983.767	0.00199145	-0.0050688	-0.000643844	-0.0179128	-0.0143322	-0.0188147	-0.0199043	-0.0163236	-0.0208062	-0.012844	-0.00926339	-0.0137459	-0.017269	-0.0136883	-0.0181709	-0.00223	1.37454e-05	-0.0011	-0.000981107	0.00126	0.000142518	-0.00195	0.000292116	-0.000826374	-0.0176743	-0.0163374	-0.0197062	-0.0118629	-0.0105234	-0.0138884	-0.0150232	-0.0136846	-0.0170486
984.731	0.000960275	-0.00524545	-0.000906931	-0.0180131	-0.0147226	-0.0208736	-0.0189734	-0.0156829	-0.0218339	-0.0127677	-0.00947714	-0.0156282	-0.0171062	-0.0138157	-0.0199667	-0.00187	0.000380672	-0.000743832	-0.000614074	0.00164	0.000516608	-0.0016	0.000655516	-0.000468988	-0.0171034	-0.0160635	-0.0210901	-0.0121536	-0.0111171	-0.0161448	-0.0142489	-0.0132139	-0.0182404
985.695	-0.000312652	-0.00542515	-0.00181011	-0.0187639	-0.0155034	-0.0224581	-0.0184512	-0.0151907	-0.0221454	-0.0133387	-0.0100782	-0.0170329	-0.0169538	-0.0136933	-0.020648	-0.00152	0.000750666	-0.00037983	-0.000244014	0.00202	0.000893768	-0.00125	0.00102	-0.000108497	-0.0169312	-0.0159414	-0.0217656	-0.0130947	-0.0120982	-0.0179267	-0.0140735	-0.013083	-0.0189092
986.659	-0.00138301	-0.00606138	-0.00381457	-0.0207748	-0.0167152	-0.0223455	-0.0193918	-0.0153322	-0.0209625	-0.0147134	-0.0106539	-0.0162841	-0.0169603	-0.0129007	-0.0185309	-0.00116	0.00112	-1.27309e-05	0.000129084	0.00241	0.00127	-0.000889818	0.00139	0.000255107	-0.0182318	-0.0164522	-0.0209498	-0.0148425	-0.0130639	-0.0175541	-0.0156047	-0.0138249	-0.0183203
987.624	-0.00228717	-0.00679433	-0.00598223	-0.0226776	-0.0182579	-0.0213673	-0.0203904	-0.0159707	-0.0190802	-0.0158833	-0.0114636	-0.014573	-0.0166954	-0.0122757	-0.0153851	-0.00079475	0.0015	0.000357359	0.000505112	0.0028	0.00166	-0.00053039	0.00176	0.000621719	-0.0195957	-0.0174707	-0.0194375	-0.0163884	-0.0142636	-0.016233	-0.0172215	-0.0150922	-0.0170633
988.588	-0.00285708	-0.00742918	-0.00741399	-0.0228929	-0.0203444	-0.0194484	-0.0200358	-0.0174873	-0.0165913	-0.0154637	-0.0129152	-0.0120192	-0.0154789	-0.0129304	-0.0120344	-0.000428887	0.00188	0.000730448	0.00088408	0.00319	0.00204	-0.000167987	0.00214	0.000991347	-0.0196069	-0.0193673	-0.0173217	-0.0163478	-0.0161052	-0.0140592	-0.0172471	-0.0170066	-0.0149619
989.552	-0.0032617	-0.00792455	-0.0084541	-0.0226633	-0.0220758	-0.0180857	-0.0194016	-0.0188141	-0.014824	-0.0147387	-0.0141512	-0.0101612	-0.0142092	-0.0136217	-0.00963164	-6.00572e-05	0.00226	0.00111	0.00127	0.00359	0.00243	0.000197399	0.00252	0.00136	-0.0193415	-0.0210741	-0.015934	-0.0160087	-0.0177412	-0.0125912	-0.0169904	-0.0187255	-0.0135755
990.516	-0.0036288	-0.00813023	-0.00913351	-0.0228098	-0.0224752	-0.0193045	-0.019181	-0.0188464	-0.0156757	-0.0146796	-0.014345	-0.0111742	-0.0136763	-0.0133417	-0.0101709	0.000311631	0.00265	0.00149	0.00165	0.00398	0.00282	0.000565663	0.0029	0.00174	-0.0194926	-0.0214964	-0.0171657	-0.0163296	-0.018325	-0.0139942	-0.0173217	-0.0193215	-0.0149908
991.481	-0.00391389	-0.00817796	-0.00949298	-0.0230182	-0.0219898	-0.0214459	-0.0191043	-0.0180759	-0.017532	-0.0148402	-0.0138118	-0.0132679	-0.0135252	-0.0124968	-0.0119529	0.000686186	0.00303	0.00187	0.00204	0.00439	0.00322	0.000936812	0.00328	0.00212	-0.0197905	-0.0211059	-0.019402	-0.0168802	-0.0182018	-0.0164879	-0.0178764	-0.0191912	-0.0174872
992.445	-0.00415362	-0.00812716	-0.00972217	-0.0233931	-0.0205054	-0.0238933	-0.0192395	-0.0163518	-0.0197396	-0.0152659	-0.0123782	-0.0157661	-0.0136709	-0.0107832	-0.0141711	0.00106	0.00342	0.00225	0.00243	0.00479	0.00362	0.00131	0.00367	0.0025	-0.0202995	-0.0197718	-0.0219896	-0.0176959	-0.0171682	-0.0193861	-0.0186885	-0.0181608	-0.0203786
993.409	-0.00423229	-0.00804448	-0.00940527	-0.023499	-0.0187286	-0.0255456	-0.0192667	-0.0144963	-0.0213133	-0.0154545	-0.0106842	-0.0175011	-0.0140937	-0.00932336	-0.0161403	0.00144	0.00382	0.00264	0.00282	0.0052	0.00402	0.00169	0.00406	0.00288	-0.0207067	-0.0183163	-0.0239533	-0.0182745	-0.0158842	-0.0215211	-0.0194343	-0.017034	-0.0226709
994.373	-0.00406845	-0.00810361	-0.00813666	-0.0229861	-0.0174157	-0.0247787	-0.0189176	-0.0133472	-0.0207103	-0.0148824	-0.00931208	-0.0166751	-0.0148494	-0.00927902	-0.0166421	0.00183	0.00421	0.00303	0.00322	0.00561	0.00442	0.00207	0.00445	0.00327	-0.0207476	-0.0175572	-0.0237403	-0.0181024	-0.0149221	-0.0210951	-0.0198231	-0.0166328	-0.0228158
995.337	-0.00359597	-0.00804283	-0.00607555	-0.0217015	-0.0163035	-0.0225449	-0.0181055	-0.0127075	-0.0189489	-0.0136587	-0.00826064	-0.014502	-0.015626	-0.0102279	-0.0164693	0.00221	0.00461	0.00342	0.00362	0.00602	0.00483	0.00245	0.00485	0.00366	-0.0203155	-0.0173175	-0.0223689	-0.0172787	-0.0142806	-0.019332	-0.0197565	-0.0167584	-0.0218098
996.302	-0.00271476	-0.0078563	-0.00265381	-0.0195618	-0.0159274	-0.0189432	-0.0168471	-0.0132127	-0.0162284	-0.0117055	-0.00807112	-0.0110869	-0.016908	-0.0132736	-0.0162894	0.0026	0.00501	0.00382	0.00402	0.00643	0.00524	0.00283	0.00525	0.00405	-0.0194471	-0.0182227	-0.0200484	-0.0157255	-0.0145011	-0.0163269	-0.0193699	-0.0181555	-0.0199712
997.266	-0.00144533	-0.00695006	0.000352239	-0.0160092	-0.0146483	-0.0149083	-0.0145639	-0.0132029	-0.0134629	-0.00905914	-0.00769821	-0.0079582	-0.0163614	-0.0150005	-0.0152605	0.00299	0.00542	0.00422	0.00442	0.00685	0.00565	0.00322	0.00565	0.00445	-0.0175539	-0.0186229	-0.0176829	-0.0134791	-0.0145482	-0.0136082	-0.0176873	-0.0187564	-0.0178164
998.23	0.000304266	-0.00447758	4.0803e-05	-0.00968254	-0.010829	-0.0125047	-0.00998681	-0.0111333	-0.012809	-0.00520496	-0.00635143	-0.00802715	-0.00972334	-0.0108698	-0.0125455	0.00339	0.00583	0.00462	0.00483	0.00727	0.00606	0.00361	0.00605	0.00485	-0.0133768	-0.0169633	-0.017429	-0.010035	-0.0136214	-0.0140872	-0.0125971	-0.0161836	-0.0166593
999.194	0.00229675	-0.00119068	0.000356484	-0.00290792	-0.00499829	-0.00844188	-0.00520467	-0.00729505	-0.0107386	-0.00171724	-0.00380762	-0.0072512	-0.0032644	-0.00535478	-0.00879836	0.00378	0.00624	0.00502	0.00524	0.00769	0.00648	0.00401	0.00646	0.00525	-0.00898467	-0.013535	-0.0157586	-0.00695724	-0.0114976	-0.0137312	-0.00759155	-0.0121319	-0.0143655
1000.16	0.00403025	0.00228949	0.00512552	0.000942509	0.00286113	0.000961855	-0.00308774	-0.00116912	-0.0030684	-0.00134698	0.000571641	-0.00132763	-0.00418301	-0.00226439	-0.00416366	0.00418	0.00665	0.00543	0.00565	0.00812	0.0069	0.0044	0.00687	0.00565	-0.00726774	-0.00781912	-0.0084984	-0.00699698	-0.00754836	-0.00822763	-0.00704244	-0.00759382	-0.00827309
1001.12	0.00639057	0.00641755	0.0118012	0.00636814	0.0127486	0.0124694	-2.2431e-05	0.00635808	0.00607879	-4.9414e-05	0.0063311	0.00605181	-0.00543307	0.000947445	0.000668156	0.00458	0.00706	0.00584	0.00606	0.00854	0.00732	0.0048	0.00728	0.00606	-0.00460243	-0.000701921	0.000238791	-0.00610941	-0.0022089	-0.00126819	-0.00613956	-0.00223905	-0.00129834
1002.09	0.0104251	0.0117834	0.0191734	0.0185843	0.0257852	0.0242795	0.00815924	0.0153601	0.0138544	0.00680093	0.0140018	0.0124961	-0.000589091	0.00661182	0.00510611	0.00499	0.00748	0.00625	0.00648	0.00897	0.00775	0.0052	0.00769	0.00647	0.00316924	0.00788014	0.00760443	0.000320933	0.00503184	0.00474613	-0.000149507	0.0045614	0.00427569
1003.05	0.0151472	0.0173601	0.0270586	0.032071	0.0386233	0.0357659	0.0169238	0.0234761	0.0206187	0.0147109	0.0212632	0.0184057	0.00501238	0.0115647	0.00870724	0.00539	0.0079	0.00667	0.0069	0.00941	0.00817	0.0056	0.00811	0.00688	0.0115338	0.0155761	0.0139487	0.00781086	0.0118532	0.0102357	0.00685627	0.0108986	0.00927114
1004.02	0.0201981	0.0224364	0.0354625	0.043596	0.0486116	0.0466588	0.0233979	0.0284135	0.0264607	0.0211596	0.0261751	0.0242224	0.00813353	0.0131491	0.0111963	0.0058	0.00832	0.00708	0.00732	0.00984	0.0086	0.00601	0.00853	0.00729	0.0175979	0.0200935	0.0193807	0.0138396	0.0163351	0.0156224	0.01286	0.0153555	0.0146428
1004.98	0.0247414	0.0266554	0.042607	0.0515107	0.0547822	0.0540864	0.0267693	0.0300408	0.0293449	0.0248553	0.0281268	0.0274309	0.00890375	0.0121752	0.0114794	0.00621	0.00875	0.0075	0.00775	0.01028	0.00903	0.00642	0.00895	0.00771	0.0205593	0.0212908	0.0218449	0.0171053	0.0178468	0.0184009	0.0164041	0.0171455	0.0176897
1005.94	0.0278907	0.0295409	0.046626	0.0524877	0.0549148	0.0543582	0.0245971	0.0270241	0.0264676	0.0229468	0.0253739	0.0248173	0.00586168	0.00828877	0.00773219	0.00663	0.00917	0.00792	0.00817	0.01072	0.00947	0.00683	0.00938	0.00813	0.0179671	0.0178541	0.0185476	0.0147768	0.0146539	0.0153473	0.0147246	0.0146017	0.0152951
1006.91	0.0294379	0.0307398	0.0477897	0.0483317	0.0501162	0.04966	0.0188938	0.0206783	0.0202221	0.0175919	0.0193765	0.0189203	0.000541995	0.00232654	0.00187034	0.00704	0.0096	0.00835	0.0086	0.01116	0.00991	0.00724	0.0098	0.00855	0.0118538	0.0110783	0.0118721	0.00899192	0.00821647	0.00901026	0.00970339	0.00892794	0.00972173
1007.87	0.0286619	0.0295501	0.0453089	0.0386562	0.0396368	0.0398593	0.00999435	0.0109749	0.0111974	0.00910617	0.0100867	0.0103092	-0.00665264	-0.00567207	-0.00544957	0.00746	0.01004	0.00877	0.00903	0.01161	0.01034	0.00766	0.01023	0.00897	0.00253435	0.000934924	0.00242742	7.61654e-05	-0.00152326	-3.07612e-05	0.00143701	-0.000152419	0.00133008
1008.84	0.0262162	0.026542	0.0404953	0.0267075	0.0268257	0.0282203	0.000491287	0.000609527	0.00200405	0.000165458	0.000283698	0.00167822	-0.0137878	-0.0136695	-0.012275	0.00788	0.01047	0.0092	0.00947	0.01205	0.01079	0.00808	0.01066	0.00939	-0.00738871	-0.00986047	-0.00719595	-0.00930454	-0.0117663	-0.00911178	-0.00750268	-0.00996444	-0.00729992
1009.8	0.0221168	0.0215392	0.0339884	0.0149417	0.0137551	0.0176554	-0.00717518	-0.00836179	-0.00446149	-0.00659757	-0.00778418	-0.00388388	-0.0190467	-0.0202333	-0.016333	0.0083	0.01091	0.00963	0.0099	0.0125	0.01123	0.0085	0.0111	0.00982	-0.0154752	-0.0192718	-0.0140915	-0.0164976	-0.0202842	-0.0151139	-0.0147093	-0.0184959	-0.0133156
1010.76	0.0175555	0.0160801	0.0270157	0.00534243	0.00350671	0.00908753	-0.0122131	-0.0140488	-0.00846799	-0.0107376	-0.0125733	-0.00699252	-0.0216733	-0.023509	-0.0179282	0.00873	0.01134	0.01007	0.01034	0.01295	0.01168	0.00892	0.01153	0.01025	-0.0209431	-0.0253888	-0.018538	-0.0210776	-0.0255233	-0.0186725	-0.0196099	-0.0240556	-0.0171948
1011.73	0.0134718	0.0114027	0.0205231	0.00107223	0.000748329	0.00424195	-0.0123996	-0.0127235	-0.00922986	-0.0103305	-0.0106544	-0.00716074	-0.0194508	-0.0197747	-0.0162811	0.00916	0.01178	0.0105	0.01078	0.01341	0.01212	0.00934	0.01197	0.01068	-0.0215596	-0.0245035	-0.0197299	-0.0211105	-0.0240644	-0.0192807	-0.0202944	-0.0232483	-0.0184647
1012.69	0.0106381	0.00823145	0.0159955	0.00105099	0.00279489	0.00362442	-0.00958712	-0.00784322	-0.00701369	-0.00718046	-0.00543656	-0.00460702	-0.0149445	-0.0132006	-0.012371	0.00959	0.01223	0.01094	0.01122	0.01386	0.01257	0.00977	0.01241	0.01112	-0.0191771	-0.0200732	-0.0179537	-0.0184005	-0.0192966	-0.017177	-0.0183778	-0.0192739	-0.0171544
1013.66	0.0103437	0.00786316	0.015635	0.00616784	0.00944791	0.00962177	-0.00417588	-0.000895807	-0.00072194	-0.00169532	0.00158475	0.00175861	-0.00946715	-0.00618708	-0.00601322	0.01002	0.01267	0.01138	0.01167	0.01432	0.01303	0.0102	0.01285	0.01156	-0.0141959	-0.0135658	-0.0121019	-0.0133653	-0.0127353	-0.0112714	-0.0141334	-0.0135034	-0.0120395
1014.62	0.0119774	0.00981852	0.0182368	0.0136776	0.0179154	0.0183161	0.00170014	0.00593797	0.00633867	0.00385905	0.00809689	0.00849759	-0.00455921	-0.000321383	7.93174e-05	0.01045	0.01312	0.01182	0.01211	0.01478	0.01348	0.01063	0.0133	0.012	-0.00874986	-0.00718203	-0.00548133	-0.00825095	-0.00668311	-0.00498241	-0.00961624	-0.00804841	-0.00634771
1015.59	0.015839	0.0147163	0.0240945	0.0217476	0.0255166	0.0272421	0.00590859	0.00967762	0.0114031	0.00703126	0.0108003	0.0125258	-0.00234693	0.0014221	0.00314758	0.01089	0.01357	0.01226	0.01256	0.01524	0.01394	0.01106	0.01374	0.01244	-0.00498141	-0.00389238	-0.000856893	-0.00552874	-0.00443971	-0.00141422	-0.00696467	-0.00587564	-0.00285016
1016.55	0.020485	0.0205591	0.0309147	0.0285293	0.0317195	0.0344289	0.00804428	0.0112345	0.0139439	0.00797015	0.0111604	0.0138698	-0.00238546	0.000804759	0.00351415	0.01132	0.01402	0.01271	0.01301	0.01571	0.01439	0.01149	0.01419	0.01288	-0.00327572	-0.00278551	0.00123388	-0.00503985	-0.00454963	-0.00052024	-0.00621177	-0.00572155	-0.00170216
1017.51	0.0247745	0.0258869	0.0366955	0.0312854	0.0350718	0.0364836	0.00651086	0.0102973	0.0117091	0.00539849	0.00918489	0.0105967	-0.0054101	-0.0016237	-0.000211878	0.01176	0.01447	0.01316	0.01346	0.01617	0.01485	0.01193	0.01464	0.01332	-0.00524914	-0.00417274	-0.00145092	-0.00806151	-0.00698511	-0.00425328	-0.00865465	-0.00757825	-0.00484642
1018.48	0.0280997	0.0297059	0.0408556	0.0308491	0.0356531	0.0352066	0.00274944	0.00755346	0.00710697	0.00114319	0.00594722	0.00550073	-0.0100064	-0.00520242	-0.00564891	0.0122	0.01493	0.0136	0.01392	0.01664	0.01532	0.01237	0.01509	0.01377	-0.00945056	-0.00737654	-0.00649303	-0.0127768	-0.0106928	-0.00981927	-0.0126595	-0.0105755	-0.00970199
1019.44	0.0293805	0.0302006	0.0420716	0.0264891	0.0326612	0.0310953	-0.00289144	0.0032807	0.00171482	-0.00371155	0.00246058	0.000894706	-0.0155826	-0.00941042	-0.0109763	0.01265	0.01538	0.01406	0.01437	0.01711	0.01578	0.01281	0.01555	0.01422	-0.0155414	-0.0120993	-0.0123452	-0.0180816	-0.0146494	-0.0148853	-0.0173493	-0.0139171	-0.014153
1020.41	0.0288927	0.0283772	0.0405686	0.0201622	0.0272901	0.0246665	-0.00873052	-0.00160264	-0.00422628	-0.008215	-0.00108712	-0.00371076	-0.0204064	-0.0132785	-0.0159021	0.01309	0.01584	0.01451	0.01483	0.01758	0.01625	0.01325	0.016	0.01467	-0.0218205	-0.0174426	-0.0187363	-0.023045	-0.0186671	-0.0199608	-0.021771	-0.0173931	-0.0186867
1021.37	0.0263113	0.0242472	0.0356315	0.01338	0.0201308	0.0159898	-0.0129314	-0.00618057	-0.0103215	-0.0108673	-0.00411646	-0.00825741	-0.0222515	-0.0155007	-0.0196417	0.01354	0.0163	0.01496	0.01529	0.01805	0.01671	0.0137	0.01646	0.01512	-0.0264714	-0.0224806	-0.0252815	-0.0261573	-0.0221665	-0.0249674	-0.0245169	-0.0205261	-0.023327
1022.34	0.0223585	0.0189791	0.0287567	0.00674734	0.0121902	0.00690366	-0.0156111	-0.0101682	-0.0154548	-0.0122318	-0.00678888	-0.0120754	-0.0220093	-0.0165665	-0.021853	0.01399	0.01676	0.01542	0.01575	0.01853	0.01718	0.01414	0.01692	0.01558	-0.0296011	-0.0269282	-0.0308748	-0.0279818	-0.0253189	-0.0292554	-0.0260844	-0.0234215	-0.0273681
1023.3	0.0173217	0.0135568	0.0206718	0.00153994	0.00443806	-0.000963733	-0.0157817	-0.0128836	-0.0182854	-0.0120168	-0.00911871	-0.0145205	-0.0191319	-0.0162338	-0.0216356	0.01444	0.01723	0.01588	0.01621	0.019	0.01765	0.01459	0.01738	0.01603	-0.0302217	-0.0301136	-0.0341654	-0.0282268	-0.0281187	-0.0321705	-0.0261552	-0.0260471	-0.0300988
1024.27	0.0121796	0.00854511	0.0129675	-0.00274286	-0.00242275	-0.00691281	-0.0149224	-0.0146023	-0.0190924	-0.011288	-0.0109679	-0.0154579	-0.0157104	-0.0153903	-0.0198804	0.01489	0.01769	0.01634	0.01668	0.01948	0.01813	0.01504	0.01784	0.01649	-0.0298124	-0.0322923	-0.0354324	-0.027968	-0.0304479	-0.0335879	-0.0258693	-0.0283492	-0.0314893
1025.23	0.00782111	0.0048794	0.00745974	-0.00613312	-0.0074285	-0.009066	-0.0139542	-0.0152496	-0.0168871	-0.0110125	-0.0123079	-0.0139454	-0.0135929	-0.0148882	-0.0165257	0.01534	0.01816	0.0168	0.01714	0.01996	0.0186	0.01549	0.01831	0.01695	-0.0292942	-0.0334096	-0.0336871	-0.0281525	-0.0322679	-0.0325454	-0.0262379	-0.0303532	-0.0306308
1026.19	0.00480258	0.00243236	0.00419991	-0.00876092	-0.0103919	-0.00932908	-0.0135635	-0.0151944	-0.0141317	-0.0111933	-0.0128242	-0.0117614	-0.0129608	-0.0145918	-0.013529	0.0158	0.01863	0.01727	0.01761	0.02044	0.01908	0.01595	0.01877	0.01741	-0.0293635	-0.0338244	-0.0314017	-0.0288033	-0.0332642	-0.0308414	-0.0273495	-0.0318004	-0.0293777
1027.16	0.00446086	0.00151165	0.00462102	-0.0112432	-0.0102958	-0.00890738	-0.015704	-0.0147566	-0.0133682	-0.0127548	-0.0118074	-0.010419	-0.0158642	-0.0149168	-0.0135284	0.01626	0.0191	0.01773	0.01808	0.02092	0.01956	0.0164	0.01924	0.01787	-0.031964	-0.0338566	-0.0310982	-0.0308348	-0.0327274	-0.029979	-0.0304044	-0.032297	-0.0295386
1028.12	0.00534307	0.00174763	0.00639451	-0.0121514	-0.00866569	-0.00802468	-0.0174945	-0.0140088	-0.0133678	-0.013899	-0.0104133	-0.00977231	-0.0185459	-0.0150602	-0.0144192	0.01671	0.01957	0.0182	0.01855	0.02141	0.02003	0.01686	0.01971	0.01834	-0.0342045	-0.0335788	-0.0315678	-0.032449	-0.0318233	-0.0298023	-0.0330089	-0.0323732	-0.0303622
1029.09	0.0062175	0.00306669	0.00712695	-0.0095835	-0.00693126	-0.00752613	-0.015801	-0.0131488	-0.0137436	-0.0126502	-0.00999795	-0.0105928	-0.0167105	-0.0140582	-0.0146531	0.01717	0.02004	0.01866	0.01902	0.02189	0.02052	0.01731	0.02018	0.0188	-0.032971	-0.0331888	-0.0324036	-0.0316702	-0.031888	-0.0311128	-0.032241	-0.0324588	-0.0316737
1030.05	0.00775761	0.00488843	0.00844591	-0.00557756	-0.00436291	-0.00675297	-0.0133352	-0.0121205	-0.0145106	-0.010466	-0.00925134	-0.0116414	-0.0140235	-0.0128088	-0.0151989	0.01763	0.02052	0.01913	0.0195	0.02238	0.021	0.01777	0.02065	0.01927	-0.0309652	-0.0326405	-0.0336406	-0.029966	-0.0316313	-0.0326414	-0.0308058	-0.0324711	-0.0334812
1031.01	0.0101095	0.00587178	0.0110132	-0.00172403	-0.000603041	-0.00568276	-0.0118335	-0.0107125	-0.0157923	-0.00759582	-0.00647482	-0.0115545	-0.0127372	-0.0116162	-0.016696	0.0181	0.02099	0.0196	0.01997	0.02287	0.02148	0.01823	0.02113	0.01974	-0.0299335	-0.0317025	-0.0353923	-0.0275658	-0.0293448	-0.0330345	-0.030586	-0.032365	-0.0360547
1031.98	0.0136237	0.00822508	0.0153327	0.00253615	0.0040346	-0.00325176	-0.0110875	-0.00958908	-0.0168754	-0.00568892	-0.00419048	-0.0114768	-0.0127966	-0.0112981	-0.0185845	0.01856	0.02147	0.02008	0.02045	0.02336	0.02197	0.01869	0.0216	0.02021	-0.0296475	-0.0310591	-0.0369554	-0.0261389	-0.0275505	-0.0334468	-0.0310561	-0.0324677	-0.038364
1032.94	0.0182246	0.0136476	0.0215374	0.00684066	0.00904232	0.00168881	-0.0113839	-0.00918225	-0.0165358	-0.00680694	-0.00460528	-0.0119588	-0.0146967	-0.0124951	-0.0198486	0.01903	0.02195	0.02055	0.02093	0.02385	0.02245	0.01916	0.02208	0.02068	-0.0304139	-0.0311323	-0.0370858	-0.0277369	-0.0284553	-0.0344088	-0.0318707	-0.032589	-0.0385425
1033.91	0.0253364	0.0223255	0.031402	0.0123633	0.0153596	0.00890633	-0.0129731	-0.00997686	-0.0164301	-0.00996213	-0.0069659	-0.0134191	-0.0190387	-0.0160424	-0.0224957	0.01949	0.02243	0.02103	0.02141	0.02434	0.02294	0.01962	0.02256	0.02116	-0.0324631	-0.0324069	-0.0374601	-0.0313721	-0.0313059	-0.0363591	-0.0343926	-0.0343364	-0.0393896
1034.87	0.0356705	0.0342485	0.0459144	0.0199939	0.0236127	0.0184905	-0.0156766	-0.0120577	-0.01718	-0.0142547	-0.0106358	-0.015758	-0.0259205	-0.0223017	-0.0274239	0.01996	0.02291	0.0215	0.02189	0.02483	0.02343	0.02009	0.02304	0.02163	-0.0356366	-0.0349677	-0.03868	-0.0361447	-0.0354658	-0.039188	-0.0395353	-0.0388664	-0.0425787
1035.84	0.05129	0.0517047	0.0675683	0.0302223	0.0342332	0.0306231	-0.0210677	-0.0170568	-0.0206669	-0.0214824	-0.0174715	-0.0210816	-0.0373459	-0.0333351	-0.0369451	0.02043	0.02339	0.02198	0.02237	0.02533	0.02392	0.02055	0.02352	0.0221	-0.0414977	-0.0404468	-0.0426469	-0.0438524	-0.0428015	-0.0450016	-0.0483918	-0.0473509	-0.049541
1036.8	0.0749393	0.0775007	0.100039	0.0433761	0.0472424	0.0448789	-0.0315632	-0.0276969	-0.0300604	-0.0341246	-0.0302583	-0.0326218	-0.0566632	-0.0527969	-0.0551603	0.0209	0.02387	0.02246	0.02285	0.02583	0.02441	0.02102	0.024	0.02258	-0.0524632	-0.0515669	-0.0525204	-0.0569746	-0.0560883	-0.0570318	-0.0637098	-0.0628235	-0.063767
1037.76	0.105286	0.11007	0.140769	0.0608328	0.0644964	0.0631688	-0.0444534	-0.0407898	-0.0421174	-0.0492374	-0.0455738	-0.0469014	-0.0799362	-0.0762726	-0.0776002	0.02137	0.02436	0.02294	0.02333	0.02632	0.0249	0.02149	0.02448	0.02306	-0.0658234	-0.0651498	-0.0650574	-0.0725674	-0.0718938	-0.0718014	-0.0815287	-0.0808552	-0.0807627
1038.73	0.143712	0.150749	0.190928	0.0836853	0.087427	0.0869666	-0.0600263	-0.0562846	-0.056745	-0.0670634	-0.0633217	-0.0637821	-0.107243	-0.103501	-0.103962	0.02184	0.02484	0.02342	0.02382	0.02682	0.02539	0.02196	0.02496	0.02354	-0.0818663	-0.0811246	-0.080165	-0.0908834	-0.0901417	-0.0891721	-0.101309	-0.100567	-0.0996074
1039.69	0.184821	0.193638	0.243006	0.113115	0.117329	0.117159	-0.0717055	-0.0674924	-0.0676623	-0.080523	-0.0763099	-0.0764797	-0.12989	-0.125677	-0.125847	0.02232	0.02533	0.0239	0.02431	0.02732	0.02589	0.02243	0.02545	0.02402	-0.0940255	-0.0928224	-0.0915623	-0.104833	-0.10363	-0.10237	-0.115545	-0.114352	-0.113092
1040.66	0.225797	0.235386	0.292294	0.151183	0.156729	0.15596	-0.074614	-0.0690678	-0.0698373	-0.084203	-0.0786568	-0.0794263	-0.141111	-0.135565	-0.136334	0.02279	0.02582	0.02438	0.02479	0.02782	0.02638	0.02291	0.02593	0.0245	-0.097404	-0.0948878	-0.0942173	-0.108993	-0.106477	-0.105806	-0.118004	-0.115478	-0.114817
1041.62	0.260288	0.269694	0.331554	0.196347	0.203359	0.200859	-0.0639404	-0.0569285	-0.0594285	-0.0733465	-0.0663346	-0.0688346	-0.135207	-0.128195	-0.130695	0.02327	0.02631	0.02487	0.02528	0.02832	0.02688	0.02338	0.02642	0.02498	-0.0872104	-0.0832385	-0.0842985	-0.0986265	-0.0946546	-0.0957146	-0.104343	-0.100372	-0.101432
1042.59	0.281097	0.289041	0.351303	0.249954	0.257916	0.251025	-0.0311428	-0.0231806	-0.0300719	-0.0390867	-0.0311245	-0.0380159	-0.101349	-0.0933866	-0.100278	0.02374	0.0268	0.02535	0.02577	0.02882	0.02738	0.02386	0.02691	0.02546	-0.0548828	-0.0499806	-0.0554219	-0.0648567	-0.0599445	-0.0653959	-0.0652683	-0.0603561	-0.0657975
1043.55	0.28794	0.293743	0.353561	0.305404	0.314026	0.303637	0.0174643	0.0260862	0.0156973	0.0116611	0.020283	0.00989404	-0.0481567	-0.0395348	-0.0499238	0.02422	0.02728	0.02584	0.02626	0.02932	0.02788	0.02433	0.0274	0.02595	-0.00675572	-0.00119379	-0.0101427	-0.0145989	-0.00903701	-0.017986	-0.0094905	-0.00393858	-0.0128775
1044.51	0.275009	0.278105	0.332721	0.357979	0.36722	0.358216	0.0829694	0.0922113	0.0832066	0.0798733	0.0891152	0.0801105	0.0252571	0.034499	0.0254943	0.0247	0.02778	0.02632	0.02675	0.02983	0.02837	0.02481	0.02789	0.02643	0.0582694	0.0644313	0.0568866	0.0531233	0.0592852	0.0517405	0.062344	0.0685059	0.0609612
1045.48	0.251681	0.252642	0.302185	0.403385	0.412482	0.406911	0.151704	0.160801	0.15523	0.150744	0.159841	0.15427	0.1012	0.110297	0.104727	0.02518	0.02827	0.02681	0.02724	0.03033	0.02887	0.02529	0.02838	0.02692	0.126524	0.132531	0.12842	0.123504	0.129511	0.1254	0.135244	0.141251	0.13714
1046.44	0.223409	0.22415	0.272043	0.436174	0.443259	0.442252	0.212765	0.21985	0.218843	0.212024	0.219109	0.218102	0.164131	0.171216	0.170209	0.02566	0.02876	0.0273	0.02773	0.03084	0.02937	0.02576	0.02887	0.02741	0.187105	0.19109	0.191543	0.184294	0.188269	0.188732	0.195726	0.1997	0.200153
1047.41	0.196156	0.198083	0.246617	0.455102	0.459689	0.462627	0.258946	0.263533	0.266471	0.257019	0.261606	0.264544	0.208485	0.213073	0.21601	0.02614	0.02925	0.02779	0.02822	0.03134	0.02988	0.02624	0.02936	0.02789	0.232806	0.234283	0.238681	0.228799	0.230266	0.234664	0.238623	0.24009	0.244498
1048.37	0.178853	0.183827	0.235853	0.455997	0.458596	0.461944	0.277143	0.279743	0.283091	0.27217	0.274769	0.278117	0.220144	0.222743	0.226091	0.02662	0.02975	0.02828	0.02872	0.03185	0.03038	0.02672	0.02985	0.02838	0.250523	0.249993	0.254811	0.24345	0.242919	0.247737	0.251354	0.250823	0.255641
1049.34	0.16805	0.176368	0.232964	0.442193	0.443371	0.446177	0.274143	0.275321	0.278127	0.265825	0.267003	0.269809	0.209229	0.210407	0.213213	0.0271	0.03024	0.02876	0.02921	0.03236	0.03088	0.0272	0.03035	0.02887	0.247043	0.245081	0.249367	0.236615	0.234643	0.238929	0.242764	0.240793	0.245078
1050.3	0.16517	0.175857	0.236823	0.413689	0.414814	0.417675	0.248519	0.249644	0.252505	0.237832	0.238957	0.241818	0.176865	0.177991	0.180851	0.02758	0.03074	0.02926	0.02971	0.03286	0.03138	0.02768	0.03084	0.02936	0.220939	0.218904	0.223245	0.208122	0.206097	0.210438	0.213689	0.211654	0.215995
1051.26	0.164516	0.176184	0.240392	0.376317	0.377521	0.38122	0.211801	0.213005	0.216704	0.200133	0.201336	0.205035	0.135925	0.137128	0.140827	0.02806	0.03123	0.02975	0.0302	0.03337	0.03189	0.02816	0.03133	0.02985	0.183741	0.181775	0.186954	0.169933	0.167966	0.173145	0.175572	0.173605	0.178784
1052.23	0.161418	0.171483	0.236633	0.334881	0.335073	0.341763	0.173463	0.173654	0.180345	0.163398	0.16359	0.17028	0.0982485	0.0984404	0.105131	0.02855	0.03173	0.03024	0.0307	0.03388	0.03239	0.02865	0.03183	0.03034	0.144913	0.141924	0.150105	0.132698	0.12971	0.13789	0.139051	0.136063	0.144244
1053.19	0.154219	0.16118	0.224417	0.292472	0.291313	0.301147	0.138252	0.137094	0.146927	0.131291	0.130133	0.139966	0.0680546	0.066896	0.0767296	0.02903	0.03222	0.03073	0.03119	0.03439	0.03289	0.02913	0.03232	0.03083	0.109222	0.104874	0.116197	0.100101	0.0957426	0.107076	0.107377	0.103028	0.114352
1054.16	0.138445	0.141013	0.197941	0.253678	0.250759	0.262467	0.115233	0.112313	0.124022	0.112665	0.109745	0.121454	0.055737	0.0528175	0.0645258	0.02951	0.03272	0.03122	0.03169	0.0349	0.0334	0.02961	0.03282	0.03132	0.0857229	0.0795935	0.0928017	0.0809749	0.0748454	0.0880537	0.0890077	0.0828783	0.0960865
1055.12	0.117872	0.116181	0.164199	0.218809	0.214965	0.226907	0.100937	0.0970933	0.109035	0.102627	0.0987839	0.110726	0.0546097	0.0507662	0.0627081	0.03	0.03322	0.03172	0.03219	0.03541	0.0339	0.0301	0.03332	0.03181	0.0709367	0.0638733	0.0773151	0.0704373	0.0633739	0.0768257	0.0788565	0.0717931	0.0852449
1056.08	0.0928836	0.0885479	0.125057	0.189682	0.187244	0.196029	0.0967987	0.0943605	0.103145	0.101134	0.0986963	0.107481	0.0646256	0.0621874	0.0709722	0.03048	0.03371	0.03221	0.03268	0.03592	0.03441	0.03058	0.03381	0.03231	0.0663187	0.0606505	0.0709354	0.0684545	0.0627763	0.0730711	0.0765951	0.0709269	0.0812118
1057.05	0.0691812	0.0638596	0.0900943	0.166356	0.166846	0.171793	0.0971745	0.0976648	0.102612	0.102496	0.102986	0.107934	0.0762615	0.0767518	0.0816992	0.03097	0.03421	0.0327	0.03318	0.03643	0.03492	0.03106	0.03431	0.0328	0.0662045	0.0634548	0.0699122	0.0693161	0.0665564	0.0730138	0.0764931	0.0737334	0.0801908
1058.01	0.0524516	0.0490623	0.070515	0.149055	0.154377	0.157403	0.0966033	0.101926	0.104951	0.0999925	0.105315	0.10834	0.0785399	0.0838623	0.0868876	0.03145	0.03471	0.03319	0.03368	0.03694	0.03542	0.03155	0.03481	0.03329	0.0651533	0.0672157	0.071761	0.0663125	0.0683749	0.0729203	0.0715445	0.0736069	0.0781522
1058.98	0.0431228	0.0424234	0.0633152	0.139092	0.149082	0.150695	0.0959688	0.105959	0.107572	0.0966682	0.106659	0.108272	0.0757764	0.0857671	0.0873799	0.03194	0.03521	0.03369	0.03418	0.03745	0.03593	0.03203	0.0353	0.03379	0.0640288	0.0707495	0.0738823	0.0624882	0.0692089	0.0723417	0.0652481	0.0719688	0.0750916
1059.94	0.0452873	0.0460126	0.0718424	0.138681	0.15099	0.151267	0.0933933	0.105703	0.10598	0.092668	0.104978	0.105255	0.0668382	0.0791479	0.079425	0.03242	0.03571	0.03418	0.03468	0.03796	0.03643	0.03252	0.0358	0.03428	0.0609733	0.069993	0.0718001	0.057988	0.0670177	0.0688248	0.0576491	0.0666788	0.0684759
1060.9	0.0536389	0.0553685	0.0882463	0.145338	0.158352	0.157047	0.0916991	0.104714	0.103408	0.0899696	0.102984	0.101678	0.0570918	0.0701061	0.0688006	0.03291	0.0362	0.03468	0.03517	0.03847	0.03694	0.033	0.0363	0.03477	0.0587891	0.0685135	0.068728	0.0547996	0.064514	0.0647384	0.052012	0.0617264	0.0619509
1061.87	0.0653528	0.0678808	0.10694	0.159824	0.171528	0.167282	0.0944715	0.106175	0.101929	0.0919434	0.103647	0.0994014	0.0528845	0.0645879	0.0603425	0.0334	0.0367	0.03517	0.03567	0.03898	0.03745	0.03349	0.0368	0.03527	0.0610715	0.0694749	0.0667595	0.0562734	0.0646668	0.0619514	0.0533198	0.0617132	0.0589978
1062.83	0.0770779	0.0800655	0.124481	0.174622	0.184221	0.177607	0.0975437	0.107143	0.100529	0.0945561	0.104156	0.0975414	0.0501405	0.0597402	0.0531258	0.03388	0.0372	0.03567	0.03617	0.03949	0.03795	0.03398	0.0373	0.03576	0.0636637	0.0699435	0.064859	0.0583861	0.0646658	0.0595914	0.0563721	0.0626518	0.0575774
1063.8	0.0844985	0.0876756	0.136012	0.18164	0.189656	0.183324	0.0971419	0.105157	0.0988257	0.0939649	0.10198	0.0956486	0.0456283	0.0536438	0.047312	0.03437	0.0377	0.03616	0.03667	0.04	0.03846	0.03446	0.03779	0.03625	0.0627719	0.0674574	0.0626657	0.0572949	0.0619803	0.0571886	0.0567806	0.0614661	0.0566744
1064.76	0.0876845	0.0903897	0.140196	0.183357	0.189639	0.184674	0.0956724	0.101955	0.0969893	0.0929671	0.0992495	0.0942841	0.0431605	0.0494429	0.0444775	0.03485	0.0382	0.03665	0.03717	0.04051	0.03897	0.03495	0.03829	0.03675	0.0608224	0.0637547	0.0603393	0.0557971	0.0587395	0.0553141	0.0570905	0.0600329	0.0566075
1065.73	0.0845646	0.08541	0.132392	0.179242	0.183239	0.180066	0.0946777	0.0986739	0.0955018	0.0938323	0.0978286	0.0946564	0.0468503	0.0508465	0.0476743	0.03534	0.0387	0.03715	0.03767	0.04102	0.03947	0.03543	0.03879	0.03724	0.0593377	0.0599739	0.0583518	0.0561623	0.0568086	0.0551864	0.0593362	0.0599725	0.0583503
1066.69	0.0772463	0.0759192	0.117656	0.17022	0.171898	0.170293	0.092974	0.0946515	0.0930464	0.0943011	0.0959786	0.0943734	0.0525638	0.0542413	0.0526362	0.03582	0.03919	0.03764	0.03816	0.04153	0.03998	0.03592	0.03929	0.03773	0.057154	0.0554615	0.0554064	0.0561411	0.0544486	0.0543934	0.0607501	0.0590576	0.0590125
1067.65	0.0664278	0.0634704	0.098306	0.156776	0.156276	0.154797	0.0903486	0.0898478	0.0883689	0.0933061	0.0928052	0.0913264	0.0584705	0.0579696	0.0564908	0.03631	0.03969	0.03814	0.03866	0.04204	0.04049	0.0364	0.03978	0.03823	0.0540386	0.0501578	0.0502289	0.0546461	0.0507652	0.0508364	0.0595958	0.0557149	0.0557861
1068.62	0.0542654	0.0501557	0.0779212	0.139696	0.137794	0.136028	0.0854303	0.0835284	0.0817629	0.08954	0.0876381	0.0858726	0.0617745	0.0598726	0.0581071	0.0368	0.04019	0.03863	0.03916	0.04255	0.04099	0.03689	0.04028	0.03872	0.0486303	0.0433384	0.0431329	0.05038	0.0450881	0.0448826	0.0548936	0.0496017	0.0493962
1069.58	0.0429296	0.0385206	0.0609449	0.119081	0.117569	0.115548	0.0761509	0.0746398	0.0726185	0.0805599	0.0790489	0.0770275	0.0581356	0.0566246	0.0546032	0.03728	0.04069	0.03912	0.03966	0.04306	0.0415	0.03737	0.04078	0.03922	0.0388709	0.0339498	0.0334985	0.0408999	0.0359889	0.0355275	0.0441232	0.0392022	0.0387408
1070.55	0.0330756	0.0287589	0.047107	0.0974635	0.0971755	0.0954663	0.0643879	0.0640998	0.0623907	0.0687046	0.0684166	0.0667074	0.0503566	0.0500685	0.0483594	0.03777	0.04118	0.03962	0.04015	0.04357	0.042	0.03786	0.04128	0.03971	0.0266179	0.0229198	0.0227707	0.0285546	0.0248466	0.0247074	0.0302505	0.0265425	0.0264033
1071.51	0.0264163	0.0222035	0.0383493	0.0765195	0.0781301	0.0784629	0.0501032	0.0517138	0.0520466	0.0543161	0.0559267	0.0562595	0.0381702	0.0397808	0.0401136	0.03825	0.04168	0.04011	0.04065	0.04408	0.04251	0.03834	0.04177	0.0402	0.0118532	0.0100338	0.0119366	0.0136661	0.0118467	0.0137495	0.0142351	0.0124157	0.0143185
1072.48	0.0219487	0.017983	0.0324787	0.0589253	0.0617147	0.0643893	0.0369765	0.0397659	0.0424406	0.0409423	0.0437317	0.0464064	0.0264466	0.029236	0.0319106	0.03873	0.04218	0.0406	0.04115	0.04459	0.04301	0.03883	0.04227	0.04069	-0.0017535	-0.00241409	0.00184057	-0.000207712	-0.000858306	0.00339636	-0.000343532	-0.000994126	0.00326054
1073.44	0.0195329	0.0160693	0.0278298	0.0492759	0.0498821	0.0545061	0.029743	0.0303492	0.0349732	0.0332067	0.0338128	0.0384369	0.0214461	0.0220523	0.0266763	0.03922	0.04267	0.04109	0.04164	0.0451	0.04352	0.03931	0.04276	0.04119	-0.00947695	-0.0123208	-0.00611676	-0.00843332	-0.0112872	-0.00508313	-0.00836812	-0.011212	-0.00501793
1074.4	0.0182927	0.0152659	0.0247611	0.0434907	0.0421356	0.0472658	0.025198	0.0238429	0.028973	0.0282248	0.0268697	0.0319998	0.0187297	0.0173745	0.0225047	0.0397	0.04317	0.04158	0.04214	0.0456	0.04402	0.0398	0.04326	0.04168	-0.014502	-0.0193271	-0.012607	-0.0139152	-0.0187303	-0.0120202	-0.0134126	-0.0182277	-0.0115175
1075.37	0.017078	0.0141097	0.0232019	0.0381322	0.0388723	0.0408748	0.0210542	0.0217944	0.0237969	0.0240225	0.0247627	0.0267652	0.0149303	0.0156705	0.017673	0.04018	0.04366	0.04207	0.04264	0.04611	0.04453	0.04028	0.04376	0.04217	-0.0191258	-0.0218656	-0.0182731	-0.0186175	-0.0213473	-0.0177648	-0.0178536	-0.0205935	-0.017001
1076.33	0.0165716	0.0133731	0.0227737	0.0358655	0.0393635	0.0373314	0.0192939	0.0227919	0.0207598	0.0224924	0.0259905	0.0239584	0.0130918	0.0165899	0.0145578	0.04067	0.04416	0.04257	0.04313	0.04662	0.04503	0.04076	0.04425	0.04266	-0.0213761	-0.0213681	-0.0218102	-0.0206376	-0.0206295	-0.0210716	-0.0200755	-0.0200675	-0.0205096
1077.3	0.0165803	0.0126347	0.0221891	0.0383393	0.0428974	0.037859	0.0217591	0.0263172	0.0212787	0.0257046	0.0302627	0.0252243	0.0161502	0.0207083	0.0156699	0.04115	0.04465	0.04305	0.04362	0.04712	0.04553	0.04124	0.04474	0.04315	-0.0193909	-0.0183328	-0.0217713	-0.0179154	-0.0168573	-0.0203057	-0.0186813	-0.0176232	-0.0210716
1078.26	0.0185828	0.0140132	0.0241039	0.0451659	0.0498205	0.0429885	0.026583	0.0312376	0.0244056	0.0311526	0.0358072	0.0289752	0.021062	0.0257165	0.0188846	0.04163	0.04514	0.04354	0.04412	0.04763	0.04603	0.04173	0.04524	0.04364	-0.015047	-0.0139024	-0.0191344	-0.0129674	-0.0118228	-0.0170548	-0.0153912	-0.0142466	-0.0194786
1079.23	0.0232767	0.0189752	0.0299542	0.0567817	0.0599128	0.0541354	0.033505	0.0366361	0.0308587	0.0378064	0.0409375	0.0351601	0.0268275	0.0299586	0.0241812	0.04211	0.04563	0.04403	0.04461	0.04813	0.04653	0.04221	0.04573	0.04413	-0.00860503	-0.00899394	-0.0131713	-0.00680357	-0.00719248	-0.0113699	-0.0105082	-0.0108971	-0.0150745
1080.19	0.0328129	0.0290554	0.0421107	0.0723624	0.0741614	0.0698695	0.0395495	0.0413485	0.0370566	0.043307	0.045106	0.0408141	0.0302517	0.0320507	0.0277588	0.04259	0.04613	0.04452	0.0451	0.04864	0.04703	0.04269	0.04622	0.04462	-0.00304052	-0.00478151	-0.00746338	-0.00179301	-0.003534	-0.00621587	-0.0068064	-0.00853739	-0.0112293
1081.15	0.049974	0.0468646	0.0644328	0.0913024	0.0939725	0.089487	0.0413284	0.0439985	0.039513	0.0444377	0.0471078	0.0426223	0.0268696	0.0295397	0.0250542	0.04307	0.04662	0.04501	0.0456	0.04914	0.04753	0.04317	0.04671	0.04511	-0.00174158	-0.00262147	-0.00549697	-0.00116226	-0.00203215	-0.00490765	-0.00771831	-0.0085882	-0.0114737
1082.12	0.0735627	0.0706406	0.0938906	0.113382	0.117869	0.112224	0.0398193	0.044306	0.0386614	0.0427414	0.047228	0.0415835	0.0194915	0.0239781	0.0183336	0.04355	0.04711	0.04549	0.04609	0.04964	0.04803	0.04365	0.0472	0.04559	-0.00373068	-0.00280401	-0.00682856	-0.00334862	-0.00241196	-0.00644651	-0.0115612	-0.0106246	-0.0146591
1083.08	0.105135	0.101206	0.130892	0.138941	0.145953	0.137533	0.0338055	0.0408184	0.0323977	0.0377346	0.0447476	0.0363268	0.00804876	0.0150617	0.00664095	0.04403	0.04759	0.04598	0.04658	0.05014	0.04853	0.04413	0.04769	0.04608	-0.0102245	-0.00677156	-0.0135823	-0.00884536	-0.00539242	-0.0122032	-0.0191062	-0.0156532	-0.022464
1084.05	0.139214	0.133417	0.168983	0.165695	0.17489	0.164063	0.0264813	0.0356758	0.0248484	0.0322787	0.0414732	0.0306458	-0.00328771	0.00590679	-0.00492066	0.0445	0.04808	0.04646	0.04707	0.05065	0.04903	0.0446	0.04818	0.04656	-0.0180187	-0.0124042	-0.0216116	-0.0147913	-0.00917679	-0.0183842	-0.0264147	-0.0208002	-0.0300077
1085.01	0.172626	0.164013	0.20342	0.192367	0.202107	0.191208	0.0197411	0.0294811	0.0185826	0.0283535	0.0380935	0.027195	-0.0110535	-0.00131353	-0.012212	0.04498	0.04857	0.04695	0.04755	0.05114	0.04952	0.04508	0.04867	0.04705	-0.0252389	-0.0190889	-0.0283674	-0.0191965	-0.0130465	-0.022325	-0.0305241	-0.024374	-0.0336525
1085.97	0.200018	0.188167	0.229484	0.216286	0.225411	0.216187	0.0162673	0.0253924	0.0161687	0.0281186	0.0372438	0.0280201	-0.0131989	-0.00407373	-0.0132974	0.04545	0.04906	0.04743	0.04804	0.05164	0.05002	0.04556	0.04916	0.04753	-0.0291827	-0.0236676	-0.0312613	-0.0199214	-0.0143962	-0.0219999	-0.0293599	-0.0238348	-0.0314285
1086.94	0.215157	0.19999	0.240604	0.234741	0.241721	0.236772	0.019584	0.0265639	0.0216147	0.0347507	0.0417305	0.0367814	-0.00586356	0.00111625	-0.0038329	0.04593	0.04954	0.04791	0.04853	0.05214	0.05051	0.04603	0.04964	0.04802	-0.026346	-0.0229761	-0.0262953	-0.0137793	-0.0104095	-0.0137286	-0.0189318	-0.015562	-0.0188911
1087.9	0.21752	0.199401	0.237594	0.24658	0.251129	0.250691	0.0290592	0.0336087	0.0331701	0.0471782	0.0517277	0.0512891	0.00898527	0.0135348	0.0130962	0.0464	0.05002	0.04839	0.04901	0.05264	0.051	0.04651	0.05013	0.0485	-0.0173408	-0.0164113	-0.0152199	-0.00183181	-0.000912255	0.000289093	-0.00202708	-0.00109753	9.38201e-05
1088.87	0.202569	0.182149	0.217049	0.249488	0.252551	0.254189	0.0469191	0.0499818	0.0516198	0.0673391	0.0704018	0.0720398	0.0324388	0.0355016	0.0371395	0.04687	0.05051	0.04887	0.0495	0.05313	0.0515	0.04698	0.05061	0.04898	4.90642e-05	-0.000528171	0.00274975	0.0178391	0.0172718	0.0205398	0.022123	0.0215558	0.0248237
1089.83	0.176126	0.154856	0.185056	0.244239	0.246439	0.249492	0.068113	0.0703135	0.0733663	0.0893824	0.0915829	0.0946357	0.059183	0.0613835	0.0644362	0.04734	0.05099	0.04935	0.04998	0.05363	0.05199	0.04745	0.0511	0.04946	0.020773	0.0193235	0.0240163	0.0394024	0.0379529	0.0426457	0.0469404	0.0454909	0.0501836
1090.8	0.139443	0.120425	0.143389	0.229539	0.231865	0.237089	0.0900961	0.0924224	0.0976467	0.109113	0.11144	0.116664	0.0861492	0.0884756	0.0936998	0.04781	0.05147	0.04983	0.05046	0.05412	0.05248	0.04792	0.05158	0.04994	0.0422861	0.0409524	0.0478167	0.0586534	0.0573197	0.064184	0.0667252	0.0653916	0.0722559
1091.76	0.101695	0.0857714	0.10158	0.209274	0.211895	0.218439	0.107579	0.1102	0.116744	0.123503	0.126124	0.132667	0.107694	0.110315	0.116859	0.04828	0.05195	0.0503	0.05094	0.05461	0.05297	0.04839	0.05206	0.05041	0.059299	0.0582498	0.0664436	0.0725628	0.0715136	0.0796974	0.0796219	0.0785727	0.0867665
1092.72	0.0735086	0.0595063	0.070861	0.186681	0.188947	0.194284	0.113172	0.115439	0.120775	0.127174	0.129441	0.134777	0.11582	0.118086	0.123423	0.04875	0.05243	0.05078	0.05142	0.0551	0.05345	0.04886	0.05254	0.05089	0.0644222	0.0630087	0.069995	0.0757545	0.074341	0.0813273	0.0805913	0.0791779	0.0861642
1093.69	0.0517867	0.0394445	0.0478981	0.16242	0.164039	0.167258	0.110633	0.112252	0.115472	0.122975	0.124595	0.127814	0.114522	0.116141	0.11936	0.04921	0.0529	0.05125	0.0519	0.05559	0.05394	0.04933	0.05302	0.05137	0.0614233	0.0593524	0.0642218	0.0710755	0.0690046	0.073874	0.0734845	0.0714137	0.0762831
1094.65	0.0379586	0.0272316	0.0344144	0.137439	0.13788	0.139121	0.0994806	0.099921	0.101162	0.110208	0.110648	0.111889	0.103025	0.103465	0.104706	0.04968	0.05338	0.05172	0.05238	0.05608	0.05442	0.0498	0.0535	0.05184	0.0498006	0.046541	0.0494422	0.0578277	0.054568	0.0574693	0.058813	0.0555533	0.0584546
1095.62	0.0290746	0.019987	0.0264726	0.114117	0.113811	0.113247	0.0850427	0.0847363	0.0841727	0.0941304	0.0938239	0.0932603	0.0876447	0.0873383	0.0867747	0.05014	0.05385	0.05219	0.05286	0.05657	0.05491	0.05026	0.05397	0.05231	0.0349027	0.0308863	0.0319827	0.0412704	0.0372539	0.0383503	0.041566	0.0375496	0.038646
1096.58	0.0227517	0.0158113	0.020743	0.0955628	0.0963355	0.0941097	0.0728111	0.0735838	0.071358	0.0797515	0.0805242	0.0782984	0.0748198	0.0755925	0.0733667	0.05061	0.05433	0.05266	0.05333	0.05705	0.05539	0.05072	0.05445	0.05278	0.0222011	0.0192538	0.018698	0.0264215	0.0234742	0.0229084	0.0272584	0.0243011	0.0237453
1097.55	0.0187189	0.0134067	0.0171262	0.0805339	0.0826824	0.0801791	0.061815	0.0639635	0.0614602	0.0671271	0.0692756	0.0667724	0.0634076	0.0655561	0.0630529	0.05107	0.0548	0.05313	0.0538	0.05754	0.05587	0.05119	0.05492	0.05325	0.010745	0.0091635	0.00833024	0.0133271	0.0117356	0.0109024	0.0147557	0.0131742	0.012341
1098.51	0.015969	0.010502	0.0142949	0.0692822	0.0716531	0.0727738	0.0533132	0.0556841	0.0568048	0.0587802	0.0611511	0.0622718	0.0549873	0.0573582	0.0584789	0.05153	0.05527	0.0536	0.05428	0.05802	0.05635	0.05165	0.05539	0.05372	0.00178319	0.000414059	0.00320482	0.00450021	0.00313108	0.00592184	0.00531096	0.00394183	0.00673259
1099.47	0.0143267	0.00811745	0.0126032	0.0604356	0.0630318	0.0678239	0.0461088	0.0487051	0.0534972	0.0523181	0.0549144	0.0597065	0.0478323	0.0504286	0.0552207	0.05198	0.05574	0.05406	0.05475	0.0585	0.05683	0.05211	0.05586	0.05419	-0.00587117	-0.00703491	-0.000562818	-0.0024319	-0.00358564	0.00287645	-0.00263339	-0.00378713	0.00267496
1100.44	0.0132793	0.00641941	0.0120943	0.0526457	0.0562649	0.0613448	0.0393664	0.0429855	0.0480654	0.0462263	0.0498454	0.0549253	0.0405514	0.0441705	0.0492504	0.05244	0.0562	0.05453	0.05522	0.05898	0.0573	0.05257	0.05633	0.05466	-0.0130736	-0.0132145	-0.00646459	-0.00899371	-0.00913455	-0.00237466	-0.01032	-0.0104608	-0.00371095
1101.4	0.0128315	0.00569893	0.0123739	0.0460922	0.0511674	0.0543986	0.0332607	0.0383359	0.0415671	0.0403933	0.0454684	0.0486997	0.0337183	0.0387935	0.0420247	0.0529	0.05667	0.05499	0.05568	0.05946	0.05778	0.05302	0.0568	0.05512	-0.0196393	-0.0183341	-0.0134229	-0.0152867	-0.0139916	-0.00908032	-0.0174203	-0.0161251	-0.0112139
1102.37	0.0128472	0.00665802	0.0132279	0.0402741	0.0475874	0.045655	0.027427	0.0347402	0.0328079	0.0336161	0.0409294	0.038997	0.0270462	0.0343595	0.0324271	0.05335	0.05713	0.05545	0.05615	0.05993	0.05825	0.05348	0.05726	0.05558	-0.025923	-0.0223898	-0.0226421	-0.0225339	-0.0190006	-0.019253	-0.0243953	-0.020862	-0.0211144
1103.33	0.0132354	0.00823006	0.0141579	0.0358846	0.0448723	0.0383075	0.0226492	0.031637	0.0250721	0.0276545	0.0366423	0.0300774	0.0217267	0.0307144	0.0241495	0.0538	0.05759	0.05591	0.05661	0.06041	0.05872	0.05393	0.05773	0.05604	-0.0311508	-0.025953	-0.0308379	-0.0289555	-0.0237677	-0.0286426	-0.0301888	-0.025001	-0.0298759
1104.3	0.0140187	0.00972743	0.01441	0.0337842	0.0421873	0.0361247	0.0197654	0.0281686	0.0221059	0.0240567	0.0324599	0.0263972	0.0193741	0.0277773	0.0217146	0.05425	0.05805	0.05637	0.05708	0.06088	0.05919	0.05439	0.05819	0.0565	-0.0344846	-0.0298814	-0.0342641	-0.0330233	-0.0284201	-0.0327928	-0.0336168	-0.0290137	-0.0333864
1105.26	0.0147201	0.0107152	0.0145363	0.0329698	0.0399276	0.0360502	0.0182497	0.0252075	0.0213301	0.0222546	0.0292124	0.0253351	0.0184335	0.0253913	0.021514	0.0547	0.05851	0.05682	0.05754	0.06135	0.05966	0.05484	0.05865	0.05696	-0.0364503	-0.0333025	-0.0354899	-0.0352854	-0.0321376	-0.0343249	-0.0356034	-0.0324556	-0.034643
1106.22	0.0147178	0.0101151	0.0150231	0.0331333	0.0384479	0.0367398	0.0184154	0.02373	0.022022	0.0230182	0.0283327	0.0266247	0.0181102	0.0234248	0.0217167	0.05515	0.05897	0.05728	0.058	0.06182	0.06012	0.05529	0.05911	0.05742	-0.0367346	-0.03524	-0.035258	-0.0349818	-0.0334873	-0.0334953	-0.0362473	-0.0347528	-0.0347708
1107.19	0.0144681	0.00916911	0.0153132	0.0330505	0.0370351	0.0368262	0.0185824	0.022567	0.0223581	0.0238814	0.027866	0.0276571	0.0177374	0.0217219	0.021513	0.05559	0.05942	0.05773	0.05845	0.06228	0.06059	0.05573	0.05957	0.05787	-0.0370076	-0.036853	-0.0353719	-0.0345686	-0.034414	-0.0329329	-0.0368999	-0.0367554	-0.0352643
1108.15	0.0142017	0.00885921	0.0147942	0.0308308	0.0347275	0.033593	0.0166291	0.0205258	0.0193913	0.0219716	0.0258683	0.0247338	0.0160366	0.0199332	0.0187988	0.05603	0.05988	0.05818	0.05891	0.06275	0.06105	0.05618	0.06002	0.05832	-0.0394009	-0.0393542	-0.0387887	-0.0369384	-0.0368817	-0.0363162	-0.0395551	-0.0394984	-0.0389328
1109.12	0.0139728	0.00888645	0.0141173	0.0281655	0.0326256	0.0297431	0.0141927	0.0186528	0.0157703	0.019279	0.0237392	0.0208566	0.0140482	0.0185084	0.0156258	0.05648	0.06033	0.05863	0.05936	0.06321	0.06151	0.05662	0.06048	0.05877	-0.0422873	-0.0416772	-0.0428597	-0.040081	-0.0394708	-0.0406534	-0.0424438	-0.0418437	-0.0430162
1110.08	0.0140243	0.00946957	0.0137911	0.0262024	0.031912	0.027428	0.0121781	0.0178876	0.0134036	0.0167328	0.0224424	0.0179584	0.0124113	0.0181209	0.0136369	0.05692	0.06078	0.05907	0.05981	0.06367	0.06197	0.05707	0.06093	0.05922	-0.0447419	-0.0428924	-0.0456664	-0.0430772	-0.0412276	-0.0440116	-0.0443508	-0.0425012	-0.0452752
1111.05	0.0140206	0.0100376	0.0136304	0.0246817	0.0313792	0.0255849	0.0106611	0.0173586	0.0115642	0.0146441	0.0213417	0.0155473	0.0110514	0.0177489	0.0119545	0.05735	0.06122	0.05952	0.06026	0.06413	0.06243	0.05751	0.06138	0.05967	-0.0466889	-0.0438614	-0.0479558	-0.0456159	-0.0427883	-0.0468827	-0.0456896	-0.0428621	-0.0469464
1112.01	0.0136861	0.0100702	0.0137672	0.0240672	0.030247	0.0239647	0.0103811	0.0165609	0.0102786	0.013997	0.0201768	0.0138945	0.0103	0.0164798	0.0101975	0.05779	0.06167	0.05996	0.06071	0.06459	0.06288	0.05795	0.06183	0.06012	-0.0474089	-0.0451091	-0.0496814	-0.046713	-0.0444132	-0.0489855	-0.0461735	-0.0438737	-0.048446
1112.97	0.0130834	0.00963395	0.0137579	0.0233357	0.0284175	0.0222776	0.0102524	0.0153341	0.00919419	0.0137018	0.0187835	0.0126436	0.00957781	0.0146595	0.00851964	0.05822	0.06211	0.0604	0.06116	0.06505	0.06333	0.05838	0.06227	0.06056	-0.0479676	-0.0467759	-0.0512058	-0.0474582	-0.0462665	-0.0506864	-0.0467481	-0.0455564	-0.0499863
1113.94	0.0120946	0.00852037	0.0130834	0.0214228	0.0251274	0.0198147	0.00932817	0.0130328	0.00772014	0.0129024	0.0166071	0.0112944	0.00833938	0.012044	0.00673135	0.05865	0.06255	0.06084	0.0616	0.0655	0.06379	0.05882	0.06272	0.061	-0.0493218	-0.0495172	-0.0531199	-0.0486976	-0.0488929	-0.0524956	-0.0485053	-0.0487007	-0.0522934
1114.9	0.0109858	0.00703377	0.0121021	0.0189156	0.021592	0.0175838	0.00792986	0.0106062	0.00659801	0.0118818	0.0145582	0.01055	0.00681355	0.00948989	0.00548171	0.05908	0.06299	0.06127	0.06205	0.06595	0.06423	0.05925	0.06316	0.06144	-0.0511501	-0.0523838	-0.054672	-0.0501682	-0.0513918	-0.05368	-0.0507801	-0.0520138	-0.054302
1115.87	0.00990906	0.00522085	0.0108328	0.0157689	0.0188088	0.0165783	0.0058598	0.00889972	0.0066692	0.010548	0.0135879	0.0113574	0.00493607	0.00797599	0.00574547	0.05951	0.06343	0.06171	0.06249	0.0664	0.06468	0.05968	0.0636	0.06188	-0.0536502	-0.0545303	-0.0550408	-0.051942	-0.0528121	-0.0533226	-0.053436	-0.0543161	-0.0548266
1116.83	0.00908786	0.00364609	0.00977513	0.0128159	0.0166665	0.0161313	0.003728	0.00757864	0.00704339	0.00916976	0.0130204	0.0124852	0.00304073	0.00689138	0.00635612	0.05994	0.06386	0.06214	0.06292	0.06685	0.06513	0.06011	0.06404	0.06231	-0.056212	-0.0562814	-0.0550966	-0.0537502	-0.0538296	-0.0526448	-0.0560498	-0.0561291	-0.0549344
1117.8	0.00871078	0.00269223	0.00932141	0.0108989	0.0155233	0.0160613	0.0021881	0.00681255	0.00735053	0.00820665	0.0128311	0.0133691	0.00157746	0.00620191	0.00673989	0.06036	0.0643	0.06257	0.06336	0.06729	0.06557	0.06054	0.06447	0.06274	-0.0581719	-0.0574875	-0.0552195	-0.0551534	-0.0544589	-0.0522009	-0.0579393	-0.0572448	-0.0549769
1118.76	0.00903426	0.00295123	0.00981223	0.00994571	0.0149684	0.0159055	0.000911449	0.00593411	0.00687123	0.00699448	0.0120171	0.0129543	0.000133481	0.00515614	0.00609326	0.06078	0.06473	0.063	0.06379	0.06774	0.06601	0.06096	0.0649	0.06318	-0.0598686	-0.0587959	-0.0561288	-0.0567955	-0.0557229	-0.0530557	-0.0597243	-0.0586417	-0.0559846
1119.72	0.0103297	0.00517783	0.0116761	0.010447	0.0145844	0.0147941	0.000117348	0.00425466	0.00446445	0.00526922	0.00940653	0.00961632	-0.00122904	0.00290828	0.00311806	0.0612	0.06515	0.06342	0.06422	0.06818	0.06644	0.06138	0.06534	0.0636	-0.0610827	-0.0608953	-0.0589556	-0.0589508	-0.0587735	-0.0568237	-0.0614969	-0.0613196	-0.0593698
1120.69	0.0127409	0.00926647	0.0150415	0.0115564	0.0147487	0.013766	-0.0011845	0.00200775	0.00102503	0.00228995	0.0054822	0.00449949	-0.00348512	-0.00029287	-0.00127559	0.06162	0.06558	0.06385	0.06465	0.06861	0.06688	0.0618	0.06576	0.06403	-0.0628045	-0.0635723	-0.062825	-0.06236	-0.0631278	-0.0623805	-0.0642182	-0.064986	-0.0642387
1121.65	0.0167187	0.0159275	0.0202619	0.0125508	0.0159201	0.013849	-0.00416784	-0.000798599	-0.00286965	-0.00337665	-7.40898e-06	-0.00207846	-0.00771105	-0.00434181	-0.00641286	0.06203	0.066	0.06427	0.06508	0.06905	0.06731	0.06222	0.06619	0.06446	-0.0661978	-0.0667986	-0.0671396	-0.0684566	-0.0690574	-0.0693885	-0.0691519	-0.0697527	-0.0700937
1122.62	0.0216137	0.023468	0.0270915	0.0135506	0.0174371	0.0142054	-0.0080631	-0.00417658	-0.00740829	-0.00991738	-0.00603086	-0.00926257	-0.0135409	-0.00965438	-0.0128861	0.06245	0.06642	0.06468	0.06551	0.06948	0.06774	0.06264	0.06662	0.06488	-0.0705131	-0.0705966	-0.0720883	-0.0754274	-0.0755109	-0.0770026	-0.075473	-0.0755665	-0.0770582
1123.58	0.0272744	0.0305105	0.0363318	0.014342	0.01893	0.0141848	-0.0129324	-0.00834438	-0.0130896	-0.0161686	-0.0115805	-0.0163258	-0.0219899	-0.0174018	-0.0221471	0.06286	0.06684	0.0651	0.06593	0.06991	0.06817	0.06305	0.06704	0.0653	-0.0757924	-0.0751844	-0.0781896	-0.0820986	-0.0814905	-0.0844958	-0.0838002	-0.0832021	-0.0862074
1124.55	0.0326586	0.036819	0.0451948	0.015204	0.0199825	0.0142523	-0.0174545	-0.0126761	-0.0184062	-0.0216149	-0.0168365	-0.0225666	-0.0299908	-0.0252124	-0.0309425	0.06326	0.06726	0.06551	0.06635	0.07034	0.0686	0.06346	0.06746	0.06571	-0.0807145	-0.0799361	-0.0839162	-0.0879649	-0.0871765	-0.0911666	-0.0910468	-0.0902683	-0.0942484
1125.51	0.0370121	0.0424028	0.0515002	0.0168995	0.0197528	0.0147869	-0.0201126	-0.0172593	-0.0222252	-0.0255033	-0.02265	-0.0276158	-0.0346007	-0.0317474	-0.0367132	0.06367	0.06767	0.06593	0.06677	0.07077	0.06902	0.06387	0.06788	0.06613	-0.0837826	-0.0849293	-0.0881552	-0.0922733	-0.09342	-0.0966358	-0.093611	-0.0947677	-0.0979836
1126.47	0.0393194	0.0451473	0.0542263	0.0177637	0.0191472	0.0153975	-0.0215557	-0.0201721	-0.0239219	-0.0273836	-0.0260001	-0.0297498	-0.0364627	-0.0350791	-0.0388289	0.06407	0.06808	0.06633	0.06718	0.07119	0.06944	0.06428	0.06829	0.06654	-0.0856257	-0.0882521	-0.0902519	-0.0945636	-0.0971901	-0.0991898	-0.0936371	-0.0962636	-0.0982634
1127.44	0.0379075	0.0420286	0.0507977	0.0157114	0.0190896	0.0162035	-0.0221961	-0.0188178	-0.021704	-0.0263172	-0.0229389	-0.0258251	-0.0350863	-0.031708	-0.0345942	0.06447	0.06849	0.06674	0.0676	0.07161	0.06986	0.06468	0.0687	0.06695	-0.0866661	-0.0873078	-0.088444	-0.0939172	-0.0945489	-0.0956851	-0.0922021	-0.0928439	-0.09398
1128.4	0.0339943	0.0357844	0.0436963	0.0127666	0.0186851	0.016052	-0.0212276	-0.0153092	-0.0179423	-0.0230177	-0.0170993	-0.0197324	-0.0309297	-0.0250112	-0.0276444	0.06487	0.0689	0.06714	0.06801	0.07203	0.07028	0.06509	0.06911	0.06736	-0.0860976	-0.0842092	-0.0850823	-0.0910277	-0.0891293	-0.0900124	-0.0888962	-0.0869977	-0.0878808
1129.37	0.0276824	0.027733	0.0337947	0.010364	0.0171592	0.0130848	-0.0173183	-0.0105232	-0.0145976	-0.017369	-0.0105738	-0.0146482	-0.0234307	-0.0166355	-0.0207099	0.06527	0.0693	0.06755	0.06841	0.07245	0.07069	0.06549	0.06952	0.06776	-0.0825883	-0.0798232	-0.0821476	-0.085779	-0.0830238	-0.0853382	-0.0828595	-0.0800944	-0.0824087
1130.33	0.0206447	0.0191093	0.023347	0.00818662	0.0150745	0.00953708	-0.0124581	-0.0055702	-0.0111076	-0.0109227	-0.00403475	-0.0095722	-0.0151604	-0.0082725	-0.0138099	0.06566	0.0697	0.06794	0.06882	0.07286	0.0711	0.06588	0.06993	0.06817	-0.0781181	-0.0752702	-0.0790476	-0.0797427	-0.0768948	-0.0806722	-0.0764087	-0.0735708	-0.0773483
1131.29	0.0145613	0.0114072	0.0149773	0.00635805	0.0124183	0.00729451	-0.00820324	-0.00214296	-0.00726678	-0.00504919	0.00101109	-0.00411273	-0.00861926	-0.00255898	-0.0076828	0.06605	0.0701	0.06834	0.06922	0.07327	0.07151	0.06628	0.07033	0.06857	-0.0742532	-0.072243	-0.0756068	-0.0742692	-0.0722589	-0.0756227	-0.0717705	-0.0697602	-0.0731241
1132.26	0.00951414	0.00516774	0.00844877	0.00499118	0.0101429	0.00554732	-0.00452295	0.000628783	-0.00396682	-0.000176557	0.00497518	0.000379579	-0.00345759	0.00169415	-0.00290145	0.06644	0.0705	0.06873	0.06962	0.07368	0.07192	0.06667	0.07073	0.06896	-0.070963	-0.0698712	-0.0726968	-0.0697966	-0.0687048	-0.0715404	-0.068415	-0.0673233	-0.0701489
1133.22	0.00633642	0.00167634	0.00464316	0.0042772	0.00937629	0.00405194	-0.00205922	0.00303987	-0.00228448	0.00260085	0.00769994	0.0023756	-0.000365969	0.00473312	-0.00059122	0.06683	0.07089	0.06912	0.07002	0.07408	0.07232	0.06706	0.07112	0.06936	-0.0688892	-0.0678501	-0.0714045	-0.0674191	-0.0663801	-0.0699444	-0.0668112	-0.0657721	-0.0693364
1134.19	0.00445481	0.000192974	0.00282891	0.0041049	0.00957872	0.00299549	-0.000349902	0.00512391	-0.00145931	0.00391193	0.00938575	0.00280252	0.00127599	0.00674981	0.000166579	0.06721	0.07128	0.06951	0.07042	0.07449	0.07272	0.06745	0.07152	0.06975	-0.0675599	-0.0661561	-0.0709693	-0.0665081	-0.0651043	-0.0699175	-0.0662592	-0.0648554	-0.0696686
1135.15	0.00364385	0.00071357	0.00266075	0.00446675	0.0109038	0.00219083	0.000822898	0.00725995	-0.00145302	0.00375318	0.0101902	0.00147726	0.001806	0.00824305	-0.000469923	0.06759	0.07167	0.0699	0.07081	0.07489	0.07312	0.06783	0.07191	0.07014	-0.0667671	-0.0644101	-0.071353	-0.0670568	-0.0646998	-0.0716427	-0.0661882	-0.0638311	-0.0707741
1136.12	0.00369306	0.00231566	0.00386151	0.00524305	0.0123997	0.00251713	0.00154998	0.0087066	-0.00117593	0.00292739	0.010084	0.000201471	0.00138154	0.00853816	-0.00134438	0.06797	0.07205	0.07028	0.0712	0.07528	0.07351	0.06821	0.0723	0.07053	-0.06642	-0.0633434	-0.0714559	-0.0682726	-0.065196	-0.0733085	-0.0666508	-0.0635841	-0.0716967
1137.08	0.00424194	0.00394077	0.00615724	0.0061903	0.0128619	0.00537932	0.00194836	0.00861992	0.00113738	0.00224953	0.0089211	0.00143855	3.30593e-05	0.00670462	-0.000777923	0.06834	0.07243	0.07066	0.07158	0.07568	0.0739	0.06859	0.07269	0.07091	-0.0663916	-0.0638101	-0.0695226	-0.0693305	-0.0667589	-0.0724614	-0.0676082	-0.0650366	-0.0707392
1138.04	0.00551506	0.00599284	0.00919298	0.00767237	0.0132017	0.009013	0.00215731	0.00768665	0.00349794	0.00167953	0.00720887	0.00302016	-0.00152061	0.00400873	-0.000179988	0.06871	0.07281	0.07104	0.07197	0.07607	0.07429	0.06897	0.07307	0.07129	-0.0665527	-0.0651233	-0.0675421	-0.0702905	-0.0688611	-0.0712698	-0.0687442	-0.0673149	-0.0697236
1139.01	0.00774942	0.00859615	0.0124691	0.0104296	0.0139041	0.0120822	0.00268021	0.00615466	0.00433279	0.00183348	0.00530793	0.00348606	-0.00203952	0.00143493	-0.00038694	0.06908	0.07319	0.07141	0.07235	0.07646	0.07468	0.06934	0.07345	0.07167	-0.0663998	-0.0670353	-0.0670772	-0.0705165	-0.0711521	-0.0711939	-0.0694295	-0.0700651	-0.070107
1139.97	0.0105472	0.0115313	0.0161457	0.013089	0.0150438	0.0147066	0.0025418	0.00449658	0.00415934	0.00155778	0.00351256	0.00317531	-0.00305664	-0.00110186	-0.0014391	0.06945	0.07356	0.07178	0.07273	0.07684	0.07506	0.06971	0.07383	0.07205	-0.0669082	-0.0690634	-0.0676207	-0.0711722	-0.0733274	-0.0718847	-0.0705448	-0.07271	-0.0712673
1140.94	0.0137083	0.014589	0.0199655	0.0137808	0.0168517	0.0161891	7.24992e-05	0.00314346	0.00248081	-0.000808262	0.0022627	0.00160004	-0.00618471	-0.00311375	-0.00377641	0.06981	0.07393	0.07215	0.0731	0.07722	0.07544	0.07008	0.0742	0.07242	-0.0697375	-0.0707865	-0.0696692	-0.0739083	-0.0749573	-0.07384	-0.0734277	-0.0744767	-0.0733594
1141.9	0.0168769	0.0178629	0.0246801	0.0147358	0.0193449	0.0176438	-0.00214118	0.00246798	0.000766843	-0.00312714	0.00148201	-0.000219124	-0.00994436	-0.00533521	-0.00703634	0.07017	0.0743	0.07252	0.07348	0.0776	0.07582	0.07045	0.07458	0.07279	-0.0723112	-0.071832	-0.0717532	-0.0766071	-0.076118	-0.0760391	-0.0760576	-0.0755784	-0.0754895
1142.87	0.019579	0.0214889	0.0311959	0.0179948	0.0228807	0.0201043	-0.00158419	0.00330169	0.000525256	-0.00349406	0.00139182	-0.00138462	-0.0132011	-0.00831521	-0.0110916	0.07053	0.07466	0.07288	0.07385	0.07798	0.0762	0.07081	0.07495	0.07316	-0.0721142	-0.0713583	-0.0723547	-0.0773441	-0.0765882	-0.0775846	-0.0765155	-0.0757696	-0.076756
1143.83	0.0219702	0.0251302	0.0387914	0.0222585	0.0266693	0.023115	0.000288341	0.00469914	0.00114477	-0.00287169	0.00153911	-0.00201526	-0.0165329	-0.0121221	-0.0156765	0.07089	0.07503	0.07324	0.07421	0.07835	0.07657	0.07117	0.07531	0.07352	-0.0706017	-0.0703309	-0.0720952	-0.0770817	-0.0768109	-0.0785853	-0.0758139	-0.0755431	-0.0773075
1144.79	0.024087	0.0287192	0.0476706	0.0275608	0.030147	0.0269169	0.00347378	0.00605997	0.00282988	-0.00115845	0.00142774	-0.00180235	-0.0201098	-0.0175236	-0.0207537	0.07124	0.07538	0.0736	0.07458	0.07873	0.07694	0.07153	0.07568	0.07389	-0.0677662	-0.06932	-0.0707701	-0.0757384	-0.0773023	-0.0787423	-0.0738719	-0.0754357	-0.0768758
1145.76	0.0258125	0.0315845	0.0559634	0.0319422	0.0329928	0.0304536	0.00612976	0.00718038	0.00464109	0.000357718	0.00140834	-0.00113095	-0.0240211	-0.0229705	-0.0255098	0.07159	0.07574	0.07395	0.07494	0.07909	0.0773	0.07188	0.07604	0.07424	-0.0654602	-0.0685596	-0.0693089	-0.0745823	-0.0776817	-0.078431	-0.0720204	-0.0751298	-0.0758691
1146.72	0.0271733	0.0330235	0.0620816	0.0326989	0.0344064	0.0326144	0.00552555	0.00723303	0.00544108	-0.000324641	0.00138284	-0.000409114	-0.0293827	-0.0276752	-0.0294672	0.07193	0.07609	0.0743	0.0753	0.07946	0.07766	0.07223	0.07639	0.0746	-0.0664045	-0.068857	-0.0688589	-0.0756246	-0.0780772	-0.0780691	-0.0722834	-0.074736	-0.0747379
1147.69	0.027775	0.0330619	0.0653839	0.0320987	0.0352633	0.0338029	0.0043237	0.00748827	0.00602789	-0.000963167	0.00220141	0.00074102	-0.0332851	-0.0301205	-0.0315809	0.07228	0.07644	0.07465	0.07565	0.07982	0.07802	0.07258	0.07675	0.07495	-0.0679563	-0.0689517	-0.0686221	-0.0766132	-0.0776186	-0.077279	-0.0725608	-0.0735663	-0.0732267
1148.65	0.0272102	0.031359	0.0643485	0.0309985	0.035981	0.0335621	0.00378836	0.00877087	0.00635196	-0.00036051	0.004622	0.00220309	-0.03335	-0.0283675	-0.0307864	0.07262	0.07679	0.07499	0.07601	0.08018	0.07838	0.07293	0.0771	0.0753	-0.0688316	-0.0680191	-0.068638	-0.0763705	-0.075558	-0.0761769	-0.0717445	-0.070932	-0.0715509
1149.62	0.025544	0.0283111	0.0600277	0.030928	0.0371343	0.0333628	0.00538393	0.0115902	0.00781876	0.00261688	0.00882316	0.00505171	-0.0290997	-0.0228934	-0.0266649	0.07295	0.07713	0.07533	0.07636	0.08053	0.07873	0.07327	0.07745	0.07565	-0.0675661	-0.0655398	-0.0675112	-0.0737431	-0.0717068	-0.0736783	-0.0688622	-0.0668359	-0.0688074
1150.58	0.0224616	0.0240109	0.05244	0.0339882	0.0392934	0.0342337	0.0115266	0.0168318	0.0117721	0.00997731	0.0152825	0.0102228	-0.0184518	-0.0131466	-0.0182063	0.07329	0.07747	0.07567	0.0767	0.08088	0.07908	0.07361	0.07779	0.07599	-0.0617634	-0.0606382	-0.0638979	-0.0667227	-0.0655975	-0.0688572	-0.0621049	-0.0609797	-0.0642394
1151.54	0.0186965	0.0190276	0.0431648	0.0393215	0.0428886	0.037044	0.020625	0.0241921	0.0183475	0.0202939	0.023861	0.0180164	-0.00384332	-0.00027621	-0.00612083	0.07362	0.07781	0.07601	0.07704	0.08123	0.07943	0.07395	0.07814	0.07633	-0.052995	-0.0536179	-0.0576625	-0.0567461	-0.057369	-0.0614136	-0.0529362	-0.053559	-0.0575937
1152.51	0.0145987	0.0136475	0.0333163	0.0469476	0.0482731	0.043079	0.032349	0.0336744	0.0284803	0.0333001	0.0346256	0.0294315	0.0136313	0.0149567	0.00976266	0.07395	0.07814	0.07634	0.07738	0.08158	0.07977	0.07428	0.07847	0.07667	-0.041601	-0.0444656	-0.0478597	-0.0440799	-0.0469544	-0.0503385	-0.0418974	-0.044762	-0.0481561
1153.47	0.011004	0.00881157	0.0243084	0.0563344	0.0562474	0.0521189	0.0453304	0.0452434	0.0411149	0.0475228	0.0474358	0.0433073	0.032026	0.0319391	0.0278106	0.07427	0.07847	0.07667	0.07772	0.08192	0.08012	0.07461	0.07881	0.077	-0.0289396	-0.0332266	-0.0355551	-0.0301972	-0.0344842	-0.0368127	-0.0299168	-0.0342037	-0.0365223
1154.44	0.0088123	0.00508185	0.017437	0.0659938	0.0676075	0.0644244	0.0571815	0.0587952	0.0556121	0.060912	0.0625257	0.0593425	0.0485569	0.0501706	0.0469874	0.07459	0.0788	0.07699	0.07806	0.08226	0.08045	0.07494	0.07914	0.07734	-0.0174085	-0.0200048	-0.0213779	-0.017148	-0.0197343	-0.0211075	-0.0189399	-0.0215262	-0.0229093
1155.4	0.00818205	0.00388167	0.0141698	0.0788126	0.0827209	0.0798394	0.0706306	0.0745389	0.0716574	0.0749309	0.0788392	0.0759577	0.0646428	0.0685511	0.0656696	0.07491	0.07912	0.07731	0.07839	0.0826	0.08079	0.07526	0.07947	0.07766	-0.00427945	-0.00458115	-0.00565264	-0.00345907	-0.00376077	-0.00483226	-0.00642588	-0.00672758	-0.00779907
1156.37	0.00926746	0.006967	0.0167399	0.099361	0.103959	0.098782	0.0900936	0.0946916	0.0895146	0.092394	0.0969921	0.091815	0.0826211	0.0872192	0.0820421	0.07523	0.07944	0.07763	0.07871	0.08293	0.08112	0.07558	0.0798	0.07799	0.0148636	0.0152516	0.0118846	0.013684	0.0140621	0.010695	0.0123449	0.012723	0.00935589
1157.33	0.0129811	0.0139019	0.024147	0.1211	0.126106	0.119791	0.108119	0.113125	0.10681	0.107198	0.112204	0.105889	0.0969531	0.101959	0.0956436	0.07554	0.07976	0.07795	0.07904	0.08326	0.08145	0.0759	0.08012	0.07831	0.0325791	0.0333645	0.0288596	0.0281583	0.0289437	0.0244387	0.0288306	0.029616	0.0251111
1158.29	0.0204157	0.0251226	0.036301	0.139068	0.145387	0.144189	0.118652	0.124972	0.123773	0.113945	0.120265	0.119066	0.102767	0.109086	0.107888	0.07585	0.08008	0.07826	0.07936	0.08358	0.08177	0.07622	0.08044	0.07863	0.042802	0.0448917	0.045513	0.0345851	0.0366848	0.0372962	0.0350712	0.0371709	0.0377823
1159.26	0.031185	0.0397686	0.052704	0.153104	0.159845	0.16404	0.121919	0.12866	0.132855	0.113335	0.120076	0.124271	0.1004	0.107141	0.111336	0.07616	0.08039	0.07857	0.07968	0.08391	0.08209	0.07653	0.08076	0.07894	0.045759	0.0482696	0.0542851	0.0336553	0.0361659	0.0421815	0.0340607	0.0365714	0.0425869
1160.22	0.0468171	0.0587787	0.07495	0.162058	0.166097	0.170419	0.115241	0.11928	0.123601	0.103279	0.107318	0.11164	0.087108	0.091147	0.0954685	0.07646	0.08069	0.07888	0.07999	0.08423	0.08241	0.07684	0.08107	0.07925	0.0387809	0.0385899	0.0447214	0.0232892	0.0230883	0.0292298	0.0254796	0.0252886	0.0314301
1161.19	0.0626605	0.0771915	0.0966745	0.163941	0.164631	0.167617	0.101281	0.101971	0.104956	0.0867498	0.0874399	0.0904251	0.0672669	0.067957	0.0709422	0.07676	0.081	0.07918	0.0803	0.08454	0.08272	0.07714	0.08138	0.07956	0.0245208	0.0209709	0.0257762	0.00644979	0.0028999	0.00770514	0.0112584	0.00770848	0.0125137
1162.15	0.0750079	0.0907499	0.112461	0.155209	0.153368	0.155693	0.0802009	0.0783601	0.080685	0.0644588	0.062618	0.0649429	0.0427476	0.0409068	0.0432317	0.07705	0.0813	0.07948	0.08061	0.08485	0.08303	0.07744	0.08169	0.07987	0.00315087	-0.00293991	0.00120497	-0.0161512	-0.022232	-0.0180871	-0.00806407	-0.0141548	-0.01001
1163.11	0.0825543	0.0982797	0.121059	0.139379	0.136627	0.138424	0.0568248	0.0540726	0.0558697	0.0410994	0.0383472	0.0401443	0.01832	0.0155678	0.0173649	0.07735	0.0816	0.07977	0.08091	0.08516	0.08334	0.07774	0.08199	0.08017	-0.0205252	-0.0275274	-0.0239003	-0.0398106	-0.0468128	-0.0431957	-0.0286821	-0.0356843	-0.0320672
1164.08	0.081984	0.096343	0.118305	0.117393	0.117799	0.119332	0.0354091	0.0358152	0.0373483	0.0210501	0.0214562	0.0229894	-0.000912256	-0.00050619	0.00102698	0.07764	0.08189	0.08007	0.08121	0.08547	0.08365	0.07804	0.08229	0.08047	-0.0422309	-0.0460748	-0.0427217	-0.0601599	-0.0640138	-0.0606606	-0.0472057	-0.0510497	-0.0476965
1165.04	0.0756225	0.0874735	0.107519	0.0934398	0.0975927	0.0992406	0.0178173	0.0219703	0.0236181	0.00596629	0.0101192	0.0117671	-0.0140796	-0.00992666	-0.00827879	0.07792	0.08218	0.08036	0.08151	0.08577	0.08395	0.07833	0.08259	0.08076	-0.0601027	-0.0602097	-0.0567419	-0.0755437	-0.0756508	-0.0721829	-0.0618295	-0.0619365	-0.0584586
1166.01	0.0636386	0.0716797	0.0891054	0.0717223	0.0772669	0.0797992	0.00808373	0.0136283	0.0161606	4.25888e-05	0.00558711	0.00811945	-0.0173831	-0.0118385	-0.0093062	0.0782	0.08247	0.08064	0.08181	0.08607	0.08424	0.07862	0.08288	0.08105	-0.0701163	-0.0688417	-0.0644794	-0.0817674	-0.0804829	-0.0761205	-0.0686865	-0.0674019	-0.0630396
1166.97	0.0491858	0.0530996	0.0676459	0.0531387	0.0585585	0.0620474	0.00395293	0.00937277	0.0128616	3.90982e-05	0.00545894	0.00894779	-0.0145073	-0.00908742	-0.00559856	0.07848	0.08275	0.08092	0.0821	0.08636	0.08454	0.0789	0.08317	0.08134	-0.0745271	-0.0733772	-0.0680584	-0.0820609	-0.0809011	-0.0755922	-0.0706206	-0.0694707	-0.0641519
1167.93	0.0350722	0.0353458	0.0473521	0.0404632	0.0432779	0.0473719	0.00539097	0.00820561	0.0122997	0.00511745	0.00793209	0.0120262	-0.00688893	-0.00407429	1.97931e-05	0.07876	0.08303	0.0812	0.08239	0.08666	0.08483	0.07919	0.08346	0.08163	-0.073369	-0.0748244	-0.0689003	-0.0772725	-0.0787279	-0.0728038	-0.0684107	-0.069866	-0.0639419
1168.9	0.0225021	0.0200021	0.0297426	0.0322697	0.0324647	0.0363806	0.00976758	0.00996252	0.0138785	0.0122677	0.0124626	0.0163785	0.00252716	0.0027221	0.00663804	0.07903	0.08331	0.08148	0.08267	0.08694	0.08511	0.07946	0.08374	0.08191	-0.0692624	-0.0733475	-0.0676015	-0.0704023	-0.0744774	-0.0687315	-0.064435	-0.0685201	-0.0627741
1169.86	0.0140002	0.0105414	0.0184458	0.0282816	0.0283797	0.0304062	0.0142814	0.0143795	0.016406	0.0177402	0.0178383	0.0198649	0.00983586	0.00993397	0.0119605	0.0793	0.08358	0.08175	0.08295	0.08723	0.0854	0.07974	0.08402	0.08219	-0.0650186	-0.0692005	-0.065344	-0.0652098	-0.0693917	-0.0655351	-0.0619786	-0.0661605	-0.062304
1170.83	0.00841274	0.00490947	0.0113428	0.0278245	0.0291704	0.0286603	0.0194118	0.0207576	0.0202475	0.022915	0.0242609	0.0237508	0.0164817	0.0178276	0.0173175	0.07957	0.08385	0.08202	0.08323	0.08751	0.08568	0.08001	0.08429	0.08246	-0.0601582	-0.0630924	-0.0617725	-0.060315	-0.0632491	-0.0619292	-0.0592402	-0.0621743	-0.0608544
1171.79	0.00570953	0.00260887	0.00780772	0.0298486	0.0344141	0.031032	0.024139	0.0287046	0.0253225	0.0272397	0.0318053	0.0284232	0.0220409	0.0266064	0.0232243	0.07983	0.08412	0.08228	0.0835	0.08779	0.08595	0.08028	0.08457	0.08273	-0.055691	-0.0554154	-0.0569575	-0.0562603	-0.0559847	-0.0575268	-0.0559028	-0.0556272	-0.0571693
1172.76	0.00504442	0.00244203	0.00699047	0.0352035	0.0420814	0.0368208	0.0301591	0.037037	0.0317764	0.0327615	0.0396394	0.0343787	0.028213	0.035091	0.0298303	0.08009	0.08438	0.08254	0.08377	0.08806	0.08623	0.08055	0.08483	0.083	-0.0499309	-0.047343	-0.0507636	-0.0510085	-0.0484206	-0.0518513	-0.0508587	-0.0482608	-0.0516914
1173.72	0.00527095	0.00274805	0.00747854	0.0458313	0.0501305	0.0462339	0.0405603	0.0448595	0.0409629	0.0430832	0.0473824	0.0434858	0.0383527	0.0426519	0.0387553	0.08035	0.08464	0.0828	0.08404	0.08833	0.0865	0.08081	0.0851	0.08326	-0.0397897	-0.0397805	-0.0418371	-0.0409568	-0.0409476	-0.0430142	-0.0411206	-0.0411114	-0.043168
1174.68	0.00725976	0.00441954	0.0103336	0.0574052	0.0581757	0.0564361	0.0501454	0.0509159	0.0491764	0.0529856	0.0537562	0.0520166	0.0470716	0.0478421	0.0461026	0.0806	0.08489	0.08306	0.0843	0.0886	0.08676	0.08107	0.08536	0.08352	-0.0304546	-0.0339741	-0.0338836	-0.0313144	-0.0348438	-0.0347434	-0.0319807	-0.0355002	-0.0353997
1175.65	0.0116465	0.00782043	0.0165504	0.0665397	0.0653615	0.0648265	0.0548932	0.0537151	0.05318	0.0587192	0.0575411	0.0570061	0.0499893	0.0488111	0.0482761	0.08085	0.08514	0.08331	0.08456	0.08886	0.08702	0.08132	0.08562	0.08378	-0.0259568	-0.0314249	-0.03013	-0.0258408	-0.0313189	-0.0300139	-0.027661	-0.0331392	-0.0318342
1176.61	0.0179896	0.0128759	0.0249169	0.0723533	0.0710562	0.07091	0.0543638	0.0530667	0.0529204	0.0594775	0.0581803	0.0580341	0.0474365	0.0461394	0.0459931	0.08109	0.08539	0.08355	0.08482	0.08912	0.08728	0.08157	0.08587	0.08404	-0.0267262	-0.0323233	-0.0306296	-0.0253425	-0.0309397	-0.0292459	-0.0283436	-0.0339407	-0.032257
1177.58	0.0267705	0.0202481	0.0353561	0.0716939	0.0745549	0.0728802	0.0449234	0.0477844	0.0461097	0.0514458	0.0543068	0.0526321	0.0363378	0.0391988	0.0375241	0.08133	0.08564	0.0838	0.08507	0.08938	0.08754	0.08182	0.08613	0.08429	-0.0364066	-0.0378556	-0.0376903	-0.0336242	-0.0350732	-0.0349079	-0.0373556	-0.0388045	-0.0386392
1178.54	0.0358562	0.0280898	0.0454567	0.0679884	0.0752216	0.0720706	0.0321322	0.0393653	0.0362143	0.0398986	0.0471317	0.0439808	0.0225317	0.0297649	0.0266139	0.08157	0.08588	0.08404	0.08532	0.08963	0.08779	0.08207	0.08637	0.08453	-0.0494378	-0.0465147	-0.0478257	-0.0454214	-0.0424983	-0.0438092	-0.0494641	-0.0465309	-0.0478419
1179.51	0.0435894	0.0351849	0.052907	0.0640494	0.0718335	0.0694524	0.02046	0.0282441	0.025863	0.0288645	0.0366486	0.0342675	0.0111424	0.0189265	0.0165454	0.08181	0.08611	0.08427	0.08557	0.08988	0.08803	0.08231	0.08662	0.08477	-0.06135	-0.0578659	-0.058407	-0.0567055	-0.0532314	-0.0537625	-0.0604726	-0.0569985	-0.0575297
1180.47	0.0490249	0.0403027	0.0573308	0.0585685	0.0654463	0.0643061	0.00954366	0.0164214	0.0152813	0.0182659	0.0251436	0.0240035	0.00123768	0.00811543	0.00697529	0.08204	0.08635	0.08451	0.08581	0.09012	0.08828	0.08255	0.08686	0.08501	-0.0724963	-0.0699286	-0.0692287	-0.0675441	-0.0649764	-0.0642765	-0.07058	-0.0680123	-0.0673024
1181.43	0.0504765	0.0416069	0.0573384	0.0509607	0.0561944	0.0556069	0.000484177	0.00571792	0.00513039	0.00935376	0.0145875	0.014	-0.0063777	-0.00114395	-0.00173148	0.08227	0.08658	0.08473	0.08605	0.09036	0.08852	0.08278	0.08709	0.08525	-0.0817858	-0.0808621	-0.0795996	-0.0766962	-0.0757725	-0.07452	-0.0784828	-0.0775591	-0.0763066
1182.4	0.0485099	0.0396981	0.0536582	0.0418683	0.0456182	0.0452423	-0.00664163	-0.00289174	-0.00326758	0.00217019	0.00592008	0.00554424	-0.0117899	-0.00804005	-0.00841589	0.08249	0.0868	0.08496	0.08628	0.0906	0.08875	0.08301	0.08733	0.08548	-0.0891316	-0.0896917	-0.0882276	-0.0841098	-0.0846799	-0.0832058	-0.0844518	-0.0850219	-0.0835477
1183.36	0.0425127	0.0340352	0.0458845	0.030914	0.035044	0.0342906	-0.0115987	-0.00746876	-0.00822211	-0.0031212	0.00100876	0.00025541	-0.0149705	-0.0108405	-0.0115939	0.08271	0.08703	0.08518	0.08652	0.09083	0.08899	0.08324	0.08756	0.08571	-0.0943087	-0.0944988	-0.0934021	-0.0896412	-0.0898212	-0.0887346	-0.0884112	-0.0886013	-0.0875046
1184.33	0.0343323	0.0262061	0.0360304	0.0205717	0.0252473	0.024155	-0.0137606	-0.00908501	-0.0101773	-0.00563435	-0.000958756	-0.00205104	-0.0154587	-0.0107831	-0.0118754	0.08293	0.08725	0.0854	0.08674	0.09106	0.08922	0.08346	0.08778	0.08594	-0.0966906	-0.096335	-0.0955773	-0.0923744	-0.0920188	-0.091271	-0.0900674	-0.0897118	-0.0889641
1185.29	0.0251694	0.0170771	0.02552	0.013499	0.0175926	0.0169893	-0.0116704	-0.00757684	-0.00818011	-0.00357809	0.000515501	-8.77727e-05	-0.012021	-0.00792746	-0.00853073	0.08314	0.08746	0.08561	0.08697	0.09129	0.08944	0.08368	0.08801	0.08616	-0.0948104	-0.0950368	-0.0937901	-0.0905481	-0.0907745	-0.0895278	-0.0884941	-0.0887305	-0.0874838
1186.26	0.0163514	0.00827126	0.0157144	0.00876711	0.0116392	0.01162	-0.00758425	-0.00471211	-0.0047314	0.00049585	0.00336798	0.0033487	-0.00694728	-0.00407515	-0.00409444	0.08335	0.08767	0.08582	0.08719	0.09151	0.08966	0.0839	0.08822	0.08637	-0.0909342	-0.0923821	-0.0905514	-0.0866942	-0.088142	-0.0863113	-0.0855729	-0.0870208	-0.0851901
1187.22	0.0097338	0.00167478	0.00865011	0.00741271	0.00763824	0.00812314	-0.00232109	-0.00209556	-0.00161065	0.00573793	0.00596346	0.00644836	-0.0012374	-0.00101187	-0.000526964	0.08356	0.08788	0.08603	0.08741	0.09173	0.08988	0.08411	0.08844	0.08659	-0.0858811	-0.0899756	-0.0876407	-0.0816721	-0.0857665	-0.0834316	-0.0821609	-0.0862654	-0.0839305
1188.18	0.00493253	-0.0026355	0.00372454	0.00619724	0.0048795	0.00490369	0.00126471	-5.30319e-05	-2.88404e-05	0.00883274	0.007515	0.00753919	0.0024727	0.00115496	0.00117915	0.08376	0.08809	0.08624	0.08762	0.09195	0.0901	0.08432	0.08865	0.0868	-0.0824953	-0.088143	-0.0862688	-0.0787873	-0.084435	-0.0825608	-0.0803758	-0.0860235	-0.0841493
1189.15	0.00250298	-0.0030389	0.00134729	0.00049458	0.00253481	-0.000600879	-0.0020084	3.18247e-05	-0.00310386	0.00353348	0.00557371	0.00243802	-0.000852714	0.00118752	-0.00194817	0.08396	0.08829	0.08644	0.08783	0.09216	0.09031	0.08453	0.08886	0.08701	-0.0859684	-0.0882582	-0.0895439	-0.0842965	-0.0865863	-0.087872	-0.0845047	-0.0867944	-0.0880801
1190.11	0.00148191	-0.00228073	0.000518252	-0.00449593	0.00120955	-0.00541257	-0.00597784	-0.000272361	-0.00689448	-0.0022152	0.00349028	-0.00313184	-0.00501418	0.000691302	-0.00593082	0.08415	0.08848	0.08663	0.08804	0.09237	0.09051	0.08473	0.08906	0.08721	-0.0901278	-0.0887524	-0.0935245	-0.0902552	-0.0888797	-0.0936418	-0.0888669	-0.0874914	-0.0922635
1191.08	0.00131528	-0.00312351	0.00060614	-0.00354645	0.00154456	-0.00695565	-0.00486172	0.000229287	-0.00827092	-0.000422942	0.00466807	-0.00383214	-0.00415259	0.000938424	-0.00756179	0.08435	0.08868	0.08682	0.08824	0.09257	0.09072	0.08493	0.08926	0.08741	-0.0892117	-0.0884507	-0.0950909	-0.0886629	-0.0879019	-0.0945521	-0.0877716	-0.0870106	-0.0936608
1192.04	0.00133088	-0.00389489	0.000914028	-0.00136859	0.00260525	-0.00658578	-0.00269947	0.00127437	-0.00791666	0.0025263	0.00650014	-0.00269089	-0.00228262	0.00169122	-0.00749981	0.08453	0.08887	0.08701	0.08844	0.09277	0.09092	0.08513	0.08946	0.08761	-0.0872295	-0.0875956	-0.0949267	-0.0859137	-0.0862699	-0.0936109	-0.0855965	-0.0859527	-0.0932937
1193.01	0.000257627	-0.00349766	0.000191597	-0.00189625	0.00363367	-0.00405519	-0.00215387	0.00337605	-0.00431282	0.00160142	0.00713134	-0.000557523	-0.00208784	0.00344208	-0.00424679	0.08472	0.08905	0.0872	0.08863	0.09297	0.09111	0.08532	0.08965	0.0878	-0.0868739	-0.085674	-0.0915128	-0.0870286	-0.0858387	-0.0916675	-0.0854858	-0.0842859	-0.0901248
1193.97	-0.000661806	-0.00296902	-0.000532262	-0.00223475	0.00474073	-0.00159846	-0.00157295	0.00540253	-0.000936658	0.000734271	0.00770975	0.00137056	-0.00170249	0.00527299	-0.0010662	0.0849	0.08923	0.08738	0.08883	0.09316	0.09131	0.08551	0.08984	0.08799	-0.0864729	-0.0838275	-0.0883167	-0.0880957	-0.0854503	-0.0899394	-0.0854188	-0.0827733	-0.0872625
1194.93	-0.000217538	-0.00304489	-0.000371739	-0.00035252	0.00563689	-0.00280791	-0.000134982	0.00585443	-0.00259037	0.00269237	0.00868178	0.000236984	1.9219e-05	0.00600863	-0.00243617	0.08508	0.08941	0.08756	0.08901	0.09335	0.09149	0.08569	0.09003	0.08817	-0.085215	-0.0835556	-0.0901504	-0.0863176	-0.0846682	-0.091253	-0.0842887	-0.0826393	-0.0892241
1195.9	0.000417703	-0.00353187	-0.000147909	0.00240581	0.00676545	-0.00336264	0.00198811	0.00634775	-0.00378034	0.00593769	0.0102973	0.000169235	0.00255372	0.00691336	-0.00321473	0.08525	0.08959	0.08773	0.0892	0.09353	0.09168	0.08587	0.09021	0.08835	-0.0832619	-0.0832422	-0.0915103	-0.0832623	-0.0832327	-0.0915108	-0.0824577	-0.082438	-0.0907061
1196.86	0.000247268	-0.00471544	-0.000578583	0.00562473	0.0087038	0.0014096	0.00537746	0.00845653	0.00116234	0.0103402	0.0134192	0.00612504	0.00620331	0.00928238	0.00198819	0.08542	0.08976	0.0879	0.08938	0.09372	0.09186	0.08605	0.09039	0.08853	-0.0800425	-0.0813035	-0.0867377	-0.0790398	-0.0803008	-0.085735	-0.0795285	-0.0807894	-0.0862236
1197.83	-4.72021e-05	-0.00589492	-0.00108774	0.00854847	0.0107601	0.00686237	0.00859567	0.0108073	0.00690957	0.0144434	0.016655	0.0127573	0.00963621	0.0118478	0.00795011	0.08559	0.08993	0.08807	0.08956	0.09389	0.09204	0.08623	0.09056	0.0887	-0.0769943	-0.0791227	-0.0811604	-0.0751166	-0.077235	-0.0792827	-0.0766519	-0.0787703	-0.080808
1198.79	-9.55267e-05	-0.00641611	-0.00130012	0.0097129	0.0122592	0.00921007	0.00980843	0.0123548	0.00930559	0.016129	0.0186754	0.0156262	0.011013	0.0135594	0.0105102	0.08575	0.09009	0.08823	0.08973	0.09407	0.09221	0.0864	0.09073	0.08887	-0.0759416	-0.0777352	-0.0789244	-0.073601	-0.0753946	-0.0765838	-0.0753049	-0.0770885	-0.0782777
1199.76	4.00221e-05	-0.00642519	-0.00133129	0.0108277	0.0137284	0.0105424	0.0107876	0.0136883	0.0105023	0.0172529	0.0201536	0.0169676	0.012159	0.0150596	0.0118737	0.08591	0.09025	0.08839	0.0899	0.09424	0.09238	0.08656	0.0909	0.08904	-0.0751224	-0.0765617	-0.0778877	-0.0726471	-0.0740864	-0.0754124	-0.0740816	-0.0755209	-0.0768469
1200.72	0.000475721	-0.00567363	-0.00115199	0.0133825	0.0153174	0.0114238	0.0129068	0.0148417	0.0109481	0.0190561	0.020991	0.0170975	0.0145345	0.0164694	0.0125758	0.08607	0.09041	0.08855	0.09007	0.0944	0.09255	0.08673	0.09106	0.0892	-0.0731632	-0.0755683	-0.0776019	-0.0710139	-0.073409	-0.0754525	-0.0718378	-0.0742329	-0.0762664
1201.68	0.00104611	-0.00469134	-0.00082145	0.0165731	0.0174827	0.0126441	0.0155269	0.0164366	0.011598	0.0212644	0.0221741	0.0173355	0.0173945	0.0183042	0.0134656	0.08622	0.09056	0.0887	0.09023	0.09457	0.09271	0.08689	0.09122	0.08936	-0.0706931	-0.0741234	-0.077102	-0.0689656	-0.0723959	-0.0753745	-0.0693164	-0.0727367	-0.0757153
1202.65	0.00160656	-0.0039319	-0.000454191	0.020391	0.0209324	0.0154697	0.0187844	0.0193259	0.0138631	0.0243229	0.0248643	0.0194016	0.0208451	0.0213866	0.0159239	0.08637	0.09071	0.08885	0.09039	0.09473	0.09287	0.08704	0.09138	0.08952	-0.0675856	-0.0713841	-0.0749869	-0.0660671	-0.0698657	-0.0734684	-0.0666806	-0.0704791	-0.0740818
1203.61	0.00221081	-0.00337582	0.000144981	0.0239382	0.0250615	0.0190348	0.0217274	0.0228507	0.016824	0.027314	0.0284373	0.0224106	0.0237932	0.0249165	0.0188898	0.08652	0.09085	0.08899	0.09054	0.09488	0.09302	0.08719	0.09153	0.08967	-0.0647926	-0.0679993	-0.072166	-0.063226	-0.0664427	-0.0706094	-0.0645753	-0.0677921	-0.0719588
1204.58	0.0028259	-0.00333648	0.00109168	0.0258871	0.029805	0.0229179	0.0230612	0.0269791	0.020092	0.0292236	0.0331415	0.0262543	0.0247954	0.0287134	0.0218262	0.08666	0.09099	0.08913	0.0907	0.09503	0.09317	0.08734	0.09168	0.08982	-0.0635988	-0.0640109	-0.069038	-0.0614764	-0.0618885	-0.0669157	-0.0641726	-0.0645947	-0.0696219
1205.54	0.00356724	-0.00326892	0.00251013	0.0275184	0.0342506	0.0270528	0.0239512	0.0306833	0.0234855	0.0307873	0.0375195	0.0303217	0.0250083	0.0317405	0.0245426	0.0868	0.09113	0.08927	0.09084	0.09518	0.09332	0.08749	0.09183	0.08996	-0.0628488	-0.0604467	-0.0657845	-0.0600527	-0.0576605	-0.0629983	-0.0640255	-0.0616333	-0.0669611
1206.51	0.00458523	-0.00267473	0.00467378	0.0296927	0.0372026	0.0312649	0.0251075	0.0326174	0.0266797	0.0323674	0.0398773	0.0339396	0.0250189	0.0325288	0.0265911	0.08693	0.09127	0.0894	0.09099	0.09532	0.09346	0.08763	0.09197	0.0901	-0.0618225	-0.0586526	-0.0627203	-0.0586226	-0.0554427	-0.0595204	-0.062998	-0.0598281	-0.0638958
1207.47	0.0057419	-0.00172753	0.00725052	0.0323434	0.039445	0.0354577	0.0266015	0.0337031	0.0297158	0.034071	0.0411726	0.0371852	0.0250929	0.0321945	0.0282072	0.08706	0.0914	0.08953	0.09113	0.09546	0.0936	0.08777	0.0921	0.09024	-0.0604585	-0.0576969	-0.0598142	-0.057059	-0.0542874	-0.0564148	-0.0613085	-0.0585369	-0.0606642
1208.43	0.00697939	-0.000371023	0.0102201	0.0360301	0.0411098	0.0396559	0.0290507	0.0341304	0.0326765	0.0364011	0.0414808	0.0400269	0.0258099	0.0308897	0.0294357	0.08719	0.09152	0.08966	0.09127	0.0956	0.09374	0.0879	0.09224	0.09038	-0.0581393	-0.0573896	-0.0569835	-0.0548689	-0.0541192	-0.0537131	-0.0583831	-0.0576434	-0.0572373
1209.4	0.00820776	0.00120351	0.0129203	0.0397355	0.0429574	0.0433213	0.0315277	0.0347496	0.0351135	0.0385319	0.0417539	0.0421178	0.0268151	0.0300371	0.030401	0.08731	0.09165	0.08978	0.0914	0.09573	0.09387	0.08804	0.09237	0.09051	-0.0557823	-0.0569004	-0.0546665	-0.0528681	-0.0539761	-0.0517522	-0.0554324	-0.0565405	-0.0543166
1210.36	0.00925289	0.00273874	0.0145581	0.0420179	0.0460686	0.045615	0.032765	0.0368157	0.0363621	0.0392792	0.0433298	0.0428763	0.0274598	0.0315105	0.0310569	0.08743	0.09176	0.0899	0.09153	0.09586	0.094	0.08816	0.0925	0.09063	-0.054665	-0.0549443	-0.0535379	-0.0522508	-0.0525302	-0.0511237	-0.0540266	-0.054316	-0.0528995
1211.33	0.0103094	0.00448907	0.0155053	0.0447104	0.0496144	0.0474645	0.034401	0.0393049	0.0371551	0.0402214	0.0451253	0.0429754	0.0292051	0.034109	0.0319592	0.08755	0.09188	0.09002	0.09166	0.09599	0.09412	0.08829	0.09262	0.09075	-0.053149	-0.0525751	-0.0528649	-0.0514386	-0.0508647	-0.0511446	-0.0524028	-0.0518289	-0.0521087
1212.29	0.0115635	0.00693691	0.0154745	0.0495105	0.0528608	0.0493795	0.037947	0.0412974	0.0378161	0.0425736	0.0459239	0.0424426	0.0340359	0.0373863	0.033905	0.08766	0.09199	0.09013	0.09178	0.09611	0.09424	0.08841	0.09274	0.09087	-0.049713	-0.0506926	-0.0523139	-0.0492064	-0.0501861	-0.0517974	-0.0489449	-0.0499245	-0.0515358
1213.25	0.0128666	0.00914084	0.0156508	0.0553827	0.0566034	0.0517741	0.0425161	0.0437368	0.0389075	0.0462419	0.0474626	0.0426333	0.0397319	0.0409526	0.0361233	0.08777	0.0921	0.09024	0.0919	0.09623	0.09436	0.08853	0.09285	0.09099	-0.0452539	-0.0483632	-0.0513325	-0.0456581	-0.0487674	-0.0517267	-0.0446726	-0.0477719	-0.0507411
1214.22	0.0141988	0.00997987	0.0175239	0.0624731	0.0617154	0.0552538	0.0482744	0.0475166	0.0410551	0.0524933	0.0517355	0.045274	0.0449493	0.0441916	0.03773	0.08788	0.0922	0.09034	0.09201	0.09634	0.09448	0.08864	0.09297	0.0911	-0.0396056	-0.0446834	-0.0492849	-0.0395167	-0.0446045	-0.049206	-0.0396239	-0.0447116	-0.0493032
1215.18	0.0153612	0.0104752	0.0198926	0.0689355	0.0672292	0.0597539	0.0535743	0.0518681	0.0443928	0.0584603	0.056754	0.0492787	0.0490429	0.0473367	0.0398614	0.08798	0.09231	0.09044	0.09213	0.09645	0.09459	0.08875	0.09307	0.09121	-0.0344057	-0.0404419	-0.0460472	-0.0336697	-0.039696	-0.0453113	-0.0350976	-0.0411238	-0.0467391
1216.15	0.0160756	0.0114563	0.0221032	0.0724845	0.0727565	0.0663443	0.0564089	0.0566809	0.0502687	0.0610281	0.0613002	0.054888	0.0503813	0.0506533	0.0442411	0.08808	0.0924	0.09054	0.09223	0.09656	0.09469	0.08886	0.09318	0.09131	-0.0316711	-0.0357191	-0.0402713	-0.0312019	-0.0352598	-0.039802	-0.0327355	-0.0367835	-0.0413256
1217.11	0.0165605	0.0123774	0.0240033	0.0745831	0.0774328	0.0722267	0.0580226	0.0608723	0.0556661	0.0622057	0.0650554	0.0598493	0.0505798	0.0534295	0.0482234	0.08818	0.0925	0.09063	0.09234	0.09666	0.09479	0.08896	0.09328	0.09141	-0.0301574	-0.0316277	-0.0349639	-0.0301343	-0.0316046	-0.0349407	-0.0315157	-0.032986	-0.0363222
1218.08	0.0169236	0.0129432	0.02511	0.0759532	0.0799702	0.0742098	0.0590296	0.0630466	0.0572862	0.06301	0.067027	0.0612666	0.0508432	0.0548602	0.0490998	0.08827	0.09259	0.09072	0.09244	0.09676	0.09489	0.08906	0.09338	0.09151	-0.0292404	-0.0295434	-0.0334338	-0.02943	-0.029733	-0.0336234	-0.0310244	-0.0313274	-0.0352178
1219.04	0.0172192	0.0132314	0.0257608	0.0765332	0.0812514	0.0745423	0.059314	0.0640322	0.0573231	0.0633018	0.06802	0.0613109	0.0507724	0.0554906	0.0487814	0.08836	0.09267	0.09081	0.09254	0.09685	0.09499	0.08915	0.09347	0.09161	-0.029046	-0.0286378	-0.0334869	-0.0292382	-0.02883	-0.0336791	-0.0311296	-0.0307314	-0.0355805
1220	0.0175259	0.0130492	0.0261343	0.0766329	0.081638	0.0742006	0.059107	0.0641122	0.0566747	0.0635837	0.0685889	0.0611514	0.0504986	0.0555038	0.0480663	0.08844	0.09276	0.09089	0.09263	0.09695	0.09508	0.08925	0.09356	0.0917	-0.029333	-0.0286478	-0.0342153	-0.0290463	-0.0283611	-0.0339286	-0.031421	-0.0307259	-0.0363033
1220.97	0.0178792	0.0129136	0.0262249	0.0758599	0.0814057	0.0738098	0.0579807	0.0635264	0.0559305	0.0629464	0.0684921	0.0608962	0.0496351	0.0551808	0.0475849	0.08852	0.09283	0.09097	0.09272	0.09703	0.09517	0.08934	0.09365	0.09178	-0.0305393	-0.0293036	-0.0350395	-0.0297736	-0.0285379	-0.0342738	-0.03238	-0.0311443	-0.0368702
1221.93	0.0183515	0.0133409	0.0260951	0.0736663	0.0812606	0.0751135	0.0553149	0.0629091	0.0567621	0.0603254	0.0679197	0.0617726	0.0475712	0.0551654	0.0490184	0.0886	0.09291	0.09104	0.09281	0.09712	0.09525	0.08942	0.09373	0.09187	-0.0332851	-0.0300009	-0.0342779	-0.0324846	-0.0292003	-0.0334774	-0.0344896	-0.0312054	-0.0354924
1222.9	0.0189118	0.0141408	0.0257195	0.0708288	0.0802717	0.0757319	0.051917	0.0613599	0.0568201	0.056688	0.0661309	0.061591	0.0451093	0.0545523	0.0500124	0.08867	0.09298	0.09112	0.09289	0.0972	0.09533	0.0895	0.09381	0.09194	-0.036753	-0.0316201	-0.0342999	-0.036202	-0.0310691	-0.033739	-0.0373844	-0.0322515	-0.0349213
1223.86	0.0196782	0.0155999	0.0248838	0.0677644	0.0775726	0.0731305	0.0480861	0.0578943	0.0534523	0.0521645	0.0619727	0.0575306	0.0428806	0.0526887	0.0482467	0.08875	0.09305	0.09119	0.09297	0.09728	0.09541	0.08958	0.09389	0.09202	-0.0406639	-0.0351557	-0.0377377	-0.0408055	-0.0353073	-0.0378794	-0.0412519	-0.0357537	-0.0383258
1224.83	0.0202771	0.0168037	0.0242158	0.0650042	0.073676	0.069516	0.0447271	0.0533989	0.0492389	0.0482005	0.0568723	0.0527123	0.0407884	0.0494602	0.0453002	0.08881	0.09312	0.09125	0.09305	0.09735	0.09549	0.08966	0.09396	0.09209	-0.0440829	-0.0397211	-0.0420111	-0.0448495	-0.0404777	-0.0427777	-0.0448862	-0.0405144	-0.0428044
1225.79	0.0203291	0.0165506	0.024684	0.0636178	0.0681716	0.0661503	0.0432888	0.0478426	0.0458213	0.0470673	0.0516211	0.0495998	0.0389338	0.0434876	0.0414663	0.08888	0.09318	0.09131	0.09312	0.09742	0.09556	0.08973	0.09403	0.09216	-0.0455912	-0.0453374	-0.0454887	-0.0460527	-0.0457989	-0.0459602	-0.0467214	-0.0464676	-0.0466189
1226.75	0.0199693	0.0159897	0.0250514	0.0624068	0.0629633	0.0633331	0.0424375	0.042994	0.0433638	0.0464171	0.0469737	0.0473434	0.0373554	0.0379119	0.0382817	0.08894	0.09323	0.09137	0.09319	0.09749	0.09562	0.0898	0.09409	0.09223	-0.0465025	-0.050236	-0.0480062	-0.0467729	-0.0505163	-0.0482766	-0.0480059	-0.0517394	-0.0495096
1227.72	0.0190239	0.0162865	0.023942	0.0599021	0.0598964	0.0620245	0.0408782	0.0408725	0.0430006	0.0436156	0.04361	0.0457381	0.0359601	0.0359545	0.0380825	0.089	0.09329	0.09142	0.09326	0.09755	0.09568	0.08986	0.09415	0.09229	-0.0481218	-0.0524175	-0.0484194	-0.0496444	-0.05394	-0.0499419	-0.0499758	-0.0542714	-0.0502834
1228.68	0.0180406	0.0161907	0.0227412	0.0579847	0.0587364	0.0615051	0.0399441	0.0406958	0.0434645	0.041794	0.0425457	0.0453144	0.0352435	0.0359952	0.0387639	0.08905	0.09334	0.09147	0.09332	0.09761	0.09574	0.08992	0.09421	0.09235	-0.0491059	-0.0526442	-0.0480055	-0.051526	-0.0550643	-0.0504256	-0.0510629	-0.0546012	-0.0499725
1229.65	0.0177172	0.0143579	0.0228656	0.0586036	0.0605894	0.0613231	0.0408864	0.0428722	0.0436059	0.0442457	0.0462315	0.0469652	0.035738	0.0377238	0.0384575	0.0891	0.09339	0.09152	0.09338	0.09766	0.0958	0.08998	0.09427	0.0924	-0.0482136	-0.0505178	-0.0479141	-0.0491343	-0.0514285	-0.0488348	-0.0495704	-0.0518747	-0.049271
1230.61	0.0174294	0.012236	0.0228452	0.0600856	0.0632782	0.0616357	0.0426562	0.0458488	0.0442063	0.0478496	0.0510423	0.0493998	0.0372403	0.040433	0.0387905	0.08915	0.09343	0.09157	0.09343	0.09772	0.09585	0.09004	0.09432	0.09245	-0.0464938	-0.0475812	-0.0473637	-0.0455804	-0.0466777	-0.0464502	-0.0471006	-0.048188	-0.0479605
1231.58	0.0166357	0.0109071	0.0212975	0.0611923	0.0644702	0.0624455	0.0445566	0.0478345	0.0458098	0.0502852	0.0535631	0.0515384	0.0398948	0.0431727	0.041148	0.08919	0.09347	0.09161	0.09349	0.09777	0.0959	0.09009	0.09437	0.0925	-0.0446334	-0.0456355	-0.0458002	-0.0432048	-0.0442069	-0.0443616	-0.0448033	-0.0458054	-0.0459601
1232.54	0.0157862	0.0101238	0.0193772	0.0625681	0.0657387	0.0637653	0.0467819	0.0499525	0.047979	0.0524443	0.0556149	0.0536415	0.0431909	0.0463615	0.0443881	0.08923	0.09351	0.09164	0.09353	0.09781	0.09595	0.09014	0.09441	0.09255	-0.0424481	-0.0435575	-0.043661	-0.0410857	-0.0421951	-0.0423085	-0.0423196	-0.043419	-0.0435325
1233.5	0.0151258	0.0101592	0.0177513	0.0643314	0.0680697	0.0655646	0.0492055	0.0529438	0.0504388	0.0541722	0.0579105	0.0554054	0.0465801	0.0503184	0.0478133	0.08927	0.09354	0.09168	0.09358	0.09785	0.09599	0.09018	0.09445	0.09259	-0.0400645	-0.0405962	-0.0412412	-0.0394078	-0.0399395	-0.0405846	-0.0397296	-0.0402613	-0.0409063
1234.47	0.014729	0.0105336	0.0165007	0.0668218	0.0708927	0.0679758	0.0520928	0.0561636	0.0532468	0.0562882	0.060359	0.0574422	0.0503211	0.0543919	0.0514751	0.0893	0.09357	0.09171	0.09362	0.09789	0.09603	0.09022	0.09449	0.09263	-0.0372072	-0.0374064	-0.0384632	-0.0373318	-0.037531	-0.0385878	-0.0368263	-0.0370255	-0.0380823
1235.43	0.0147685	0.0108055	0.015965	0.0707517	0.0740287	0.07127	0.0559831	0.0592602	0.0565014	0.0599462	0.0632232	0.0604644	0.0547867	0.0580638	0.055305	0.08934	0.0936	0.09174	0.09366	0.09792	0.09606	0.09026	0.09452	0.09266	-0.0333569	-0.0343398	-0.0352386	-0.0337138	-0.0346968	-0.0355956	-0.0331456	-0.0341285	-0.0350273
1236.4	0.0151944	0.0111336	0.0160354	0.0751218	0.0772893	0.0750003	0.0599274	0.062095	0.0598059	0.0639881	0.0661557	0.0638666	0.0590863	0.0612539	0.0589648	0.08936	0.09362	0.09176	0.0937	0.09796	0.09609	0.0903	0.09456	0.09269	-0.0294326	-0.031525	-0.0319541	-0.0297119	-0.0318043	-0.0322234	-0.02952	-0.0316124	-0.0320315
1237.36	0.0160426	0.0114608	0.0167513	0.0791268	0.0802422	0.0788266	0.0630841	0.0641996	0.0627839	0.067666	0.0687814	0.0673658	0.0623754	0.0634909	0.0620752	0.08939	0.09364	0.09178	0.09373	0.09798	0.09612	0.09033	0.09458	0.09272	-0.0263059	-0.0294404	-0.0289961	-0.026064	-0.0291986	-0.0287542	-0.0267256	-0.0298601	-0.0294158
1238.32	0.0172279	0.011993	0.0180089	0.0828974	0.0834396	0.0827001	0.0656695	0.0662117	0.0654722	0.0709044	0.0714466	0.0707072	0.0648884	0.0654307	0.0646912	0.08941	0.09366	0.0918	0.09376	0.09801	0.09614	0.09036	0.09461	0.09274	-0.0237405	-0.0274483	-0.0263278	-0.0228556	-0.0265634	-0.0254328	-0.0244472	-0.028155	-0.0270244
1239.29	0.0187118	0.0129448	0.0197734	0.0858702	0.0872218	0.0862578	0.0671584	0.06851	0.067546	0.0729254	0.074277	0.073313	0.0660968	0.0674483	0.0664844	0.08943	0.09367	0.09181	0.09378	0.09803	0.09617	0.09038	0.09463	0.09277	-0.0222716	-0.02516	-0.024264	-0.0208546	-0.023753	-0.022857	-0.0230387	-0.0259372	-0.0250411
1240.25	0.0203892	0.0142327	0.0218774	0.0893222	0.091792	0.0901026	0.0689331	0.0714028	0.0697134	0.0750895	0.0775593	0.0758699	0.0674448	0.0699146	0.0682252	0.08944	0.09368	0.09182	0.0938	0.09805	0.09618	0.0904	0.09464	0.09278	-0.0205069	-0.0222772	-0.0221066	-0.0187105	-0.0204907	-0.0203101	-0.0212286	-0.0229989	-0.0228283
1241.22	0.0221654	0.0158721	0.0241857	0.0944062	0.097737	0.094611	0.0722408	0.0755715	0.0724455	0.0785341	0.0818649	0.0787389	0.0702206	0.0735513	0.0704253	0.08945	0.09369	0.09183	0.09382	0.09806	0.0962	0.09042	0.09466	0.0928	-0.0172092	-0.0181185	-0.0193845	-0.0152859	-0.0161951	-0.0174611	-0.0177486	-0.0186579	-0.0199238
1242.18	0.0239706	0.0177816	0.0265666	0.100932	0.104247	0.100099	0.0769611	0.0802767	0.0761286	0.0831501	0.0864657	0.0823176	0.074365	0.0776806	0.0735326	0.08946	0.09369	0.09183	0.09384	0.09807	0.09621	0.09044	0.09467	0.09281	-0.0124989	-0.0134133	-0.0157014	-0.0106899	-0.0116043	-0.0138924	-0.0129227	-0.0138371	-0.0161252
1243.15	0.0256638	0.0198267	0.0287251	0.110018	0.110784	0.107337	0.0843541	0.0851201	0.0816733	0.0901911	0.0909571	0.0875103	0.0812927	0.0820587	0.0786119	0.08947	0.09369	0.09183	0.09385	0.09808	0.09622	0.09045	0.09468	0.09282	-0.00511594	-0.00856992	-0.0101567	-0.00365889	-0.00712287	-0.00870967	-0.00572452	-0.0091885	-0.0107753
1244.11	0.0273627	0.0221825	0.031017	0.118889	0.117123	0.115341	0.0915258	0.0897603	0.0879781	0.096706	0.0949405	0.0931583	0.0878715	0.086106	0.0843238	0.08947	0.09369	0.09183	0.09386	0.09808	0.09622	0.09046	0.09468	0.09282	0.00205585	-0.00392966	-0.00385186	0.00284604	-0.00313947	-0.00306167	0.00108272	-0.00490279	-0.00482499
1245.07	0.0291441	0.0252972	0.0337723	0.124455	0.122545	0.123545	0.0953112	0.0934009	0.0944005	0.099158	0.0972477	0.0982473	0.0906829	0.0887726	0.0897723	0.08947	0.09368	0.09182	0.09387	0.09808	0.09622	0.09047	0.09468	0.09282	0.00584117	-0.000279148	0.0025805	0.00528801	-0.000832307	0.00202734	0.00431171	-0.0018086	0.00105104
1246.04	0.0309894	0.0282161	0.0367739	0.128775	0.127998	0.131465	0.0977853	0.0970088	0.100475	0.100559	0.0997822	0.103249	0.0920008	0.0912243	0.0946909	0.08947	0.09368	0.09182	0.09387	0.09808	0.09622	0.09047	0.09468	0.09282	0.00831528	0.00332881	0.00865533	0.00668864	0.00170216	0.00702869	0.00629179	0.00130532	0.00663184
1247	0.0329415	0.0298782	0.040267	0.132684	0.13486	0.138959	0.0997429	0.101919	0.106018	0.102806	0.104982	0.109081	0.0924174	0.0945934	0.0986923	0.08946	0.09366	0.0918	0.09387	0.09808	0.09622	0.09047	0.09468	0.09282	0.0102829	0.00825888	0.0142177	0.00893618	0.0069022	0.0128611	0.00807369	0.0060397	0.0119986
1247.97	0.0348933	0.0310497	0.0431951	0.136753	0.141126	0.144438	0.10186	0.106232	0.109544	0.105704	0.110076	0.113388	0.0935583	0.0979306	0.101243	0.08945	0.09365	0.09179	0.09387	0.09807	0.09621	0.09047	0.09467	0.09281	0.01241	0.0125823	0.0177543	0.0118336	0.012006	0.017178	0.0102457	0.0104181	0.0155901
1248.93	0.0364832	0.0316792	0.0435235	0.142741	0.144617	0.144733	0.106258	0.108134	0.10825	0.111061	0.112938	0.113054	0.0992171	0.101093	0.10121	0.08944	0.09363	0.09177	0.09386	0.09805	0.0962	0.09046	0.09466	0.0928	0.0168175	0.0145038	0.0164802	0.0172015	0.0148878	0.0168542	0.0151831	0.0128594	0.0148358
1249.89	0.0385178	0.0331584	0.0444323	0.147913	0.147225	0.144433	0.109395	0.108707	0.105915	0.114754	0.114066	0.111275	0.103481	0.102792	0.100001	0.08942	0.09361	0.09175	0.09385	0.09804	0.09618	0.09045	0.09464	0.09278	0.019975	0.0150969	0.0141654	0.0209044	0.0160263	0.0150948	0.0186053	0.0137272	0.0127957
1250.86	0.0413297	0.0368937	0.0485803	0.149239	0.150499	0.148499	0.10791	0.109169	0.107169	0.112346	0.113605	0.111605	0.100659	0.101919	0.0999189	0.0894	0.09358	0.09173	0.09384	0.09802	0.09616	0.09044	0.09462	0.09277	0.0185096	0.0155894	0.0154394	0.0185056	0.0155855	0.0154455	0.016196	0.0132758	0.0131258
1251.82	0.0459802	0.0427901	0.0554954	0.14937	0.153283	0.152639	0.10339	0.107303	0.106659	0.10658	0.110493	0.109849	0.0938747	0.0977874	0.0971433	0.08938	0.09355	0.0917	0.09382	0.098	0.09614	0.09043	0.0946	0.09275	0.0140099	0.0137526	0.0149585	0.01276	0.0124927	0.0137086	0.0104579	0.0102006	0.0114065
1252.79	0.0540743	0.0515181	0.0659836	0.149953	0.154617	0.153368	0.0958787	0.100543	0.0992937	0.0984349	0.103099	0.10185	0.0839694	0.0886336	0.0873845	0.08935	0.09352	0.09167	0.09381	0.09797	0.09612	0.09041	0.09458	0.09272	0.00652866	0.00702291	0.00762375	0.00462494	0.00512919	0.00573002	0.00214158	0.00263582	0.00324666
1253.75	0.0643131	0.0621875	0.0788697	0.150963	0.155456	0.153223	0.0866503	0.0911432	0.0889102	0.0887759	0.0932688	0.0910359	0.0720938	0.0765867	0.0743537	0.08933	0.09349	0.09164	0.09378	0.09795	0.09609	0.09039	0.09455	0.0927	-0.00267969	-0.00234678	-0.00272978	-0.00500406	-0.00468116	-0.00505415	-0.00779303	-0.00746013	-0.00784312
1254.72	0.0764723	0.0747664	0.0940587	0.153121	0.156009	0.153068	0.0766492	0.0795366	0.0765952	0.078355	0.0812424	0.0783011	0.0590628	0.0619502	0.0590088	0.0893	0.09345	0.0916	0.09376	0.09792	0.09606	0.09037	0.09452	0.09267	-0.0126508	-0.0139134	-0.0150048	-0.015405	-0.0166776	-0.0177589	-0.0185537	-0.0198163	-0.0209076
1255.68	0.0889328	0.087351	0.109116	0.155842	0.157551	0.154436	0.0669088	0.0686184	0.0655034	0.0684907	0.0702003	0.0670852	0.0467257	0.0484353	0.0453202	0.08926	0.09341	0.09156	0.09373	0.09788	0.09603	0.09034	0.09449	0.09264	-0.0223512	-0.0247916	-0.0260566	-0.0252393	-0.0276797	-0.0289448	-0.0288562	-0.0312965	-0.0325616
1256.64	0.10018	0.0981029	0.121617	0.158294	0.161542	0.159711	0.0581139	0.0613619	0.059531	0.0601908	0.0634388	0.0616079	0.0366771	0.039925	0.0380941	0.08923	0.09337	0.09152	0.0937	0.09785	0.09599	0.09031	0.09445	0.0926	-0.0311161	-0.0320081	-0.031989	-0.0335092	-0.0344112	-0.0343821	-0.0379147	-0.0388067	-0.0387876
1257.61	0.109677	0.106793	0.131436	0.161933	0.167643	0.167217	0.052256	0.0579665	0.0575403	0.0551397	0.0608502	0.060424	0.0304969	0.0362074	0.0357812	0.08919	0.09333	0.09147	0.09367	0.09781	0.09595	0.09028	0.09442	0.09256	-0.036934	-0.0353635	-0.0339297	-0.0385303	-0.0369598	-0.035526	-0.0435015	-0.041931	-0.0404973
1258.57	0.116047	0.111943	0.136856	0.167616	0.176287	0.176356	0.0515691	0.0602406	0.0603097	0.0556721	0.0643436	0.0644128	0.0307592	0.0394307	0.0394998	0.08915	0.09328	0.09143	0.09363	0.09776	0.09591	0.09024	0.09437	0.09252	-0.0375809	-0.0330394	-0.0311203	-0.0379579	-0.0334164	-0.0314972	-0.0428184	-0.0382768	-0.0363577
1259.54	0.120295	0.115462	0.14023	0.176307	0.186626	0.186283	0.0560118	0.0663309	0.0659871	0.0608453	0.0711644	0.0708206	0.0360775	0.0463965	0.0460528	0.0891	0.09323	0.09138	0.09359	0.09772	0.09587	0.09021	0.09433	0.09248	-0.0330882	-0.0268991	-0.0253929	-0.0327447	-0.0265556	-0.0250494	-0.0367703	-0.0305713	-0.0290651
1260.5	0.122304	0.118425	0.143091	0.190412	0.197618	0.194985	0.0681083	0.0753141	0.0726815	0.0719875	0.0791933	0.0765607	0.0473215	0.0545274	0.0518948	0.08906	0.09317	0.09132	0.09355	0.09767	0.09582	0.09017	0.09428	0.09243	-0.0209517	-0.0178559	-0.0186385	-0.0215625	-0.0184767	-0.0192593	-0.0231493	-0.0200535	-0.020836
1261.47	0.124072	0.121848	0.146172	0.20647	0.210279	0.20536	0.0823979	0.0862075	0.0812881	0.0846219	0.0884314	0.0835121	0.0602981	0.0641076	0.0591882	0.08901	0.09312	0.09127	0.09351	0.09762	0.09577	0.09012	0.09423	0.09238	-0.00661205	-0.00691254	-0.00998189	-0.0088881	-0.00918859	-0.0122579	-0.00838555	-0.00868604	-0.0117554
1262.43	0.127227	0.127205	0.150276	0.2215	0.225598	0.220455	0.0942733	0.0983716	0.0932281	0.0942957	0.0983939	0.0932504	0.0712243	0.0753225	0.070179	0.08896	0.09306	0.09121	0.09346	0.09756	0.09572	0.09008	0.09418	0.09233	0.00531335	0.00531155	0.00201806	0.000835696	0.000833901	-0.00246959	0.000943889	0.000942094	-0.0023514
1263.39	0.132768	0.134202	0.156729	0.236468	0.24262	0.237801	0.1037	0.109852	0.105033	0.102266	0.108418	0.1036	0.0797394	0.0858914	0.0810728	0.0889	0.09299	0.09115	0.09341	0.09751	0.09566	0.09003	0.09412	0.09228	0.0147997	0.0168618	0.0138831	0.00885639	0.0109085	0.00793979	0.00742752	0.00948959	0.00651092
1264.36	0.143242	0.143459	0.168484	0.251597	0.262059	0.257041	0.108355	0.118817	0.113798	0.108138	0.1186	0.113582	0.0831129	0.093575	0.0885565	0.08884	0.09293	0.09108	0.09336	0.09745	0.0956	0.08998	0.09407	0.09222	0.0195148	0.0258869	0.0227184	0.0147782	0.0211503	0.0179818	0.0107687	0.0171408	0.0139724
1265.32	0.155634	0.153711	0.181457	0.266129	0.279892	0.274891	0.110494	0.124258	0.119257	0.112418	0.126181	0.12118	0.0846712	0.0984343	0.0934335	0.08878	0.09286	0.09102	0.09331	0.09738	0.09554	0.08993	0.094	0.09216	0.0217145	0.0313976	0.0282368	0.0191081	0.0288013	0.0256405	0.0129756	0.0226687	0.0195079
1266.29	0.168875	0.164898	0.193121	0.280082	0.291934	0.287495	0.111206	0.123059	0.11862	0.115184	0.127036	0.122597	0.0869608	0.0988135	0.0943743	0.08872	0.09279	0.09095	0.09325	0.09732	0.09547	0.08987	0.09394	0.0921	0.0224862	0.0302689	0.0276697	0.0219337	0.0297164	0.0271272	0.0160837	0.0238663	0.0212672
1267.25	0.179668	0.174016	0.201752	0.291343	0.299377	0.296216	0.111675	0.119708	0.116548	0.117328	0.125361	0.1222	0.0895911	0.0976244	0.0944637	0.08866	0.09272	0.09088	0.09319	0.09725	0.09541	0.08981	0.09387	0.09203	0.0230149	0.0269883	0.0256676	0.0241376	0.0281109	0.0267902	0.0197456	0.0237189	0.0223982
1268.22	0.184097	0.178097	0.204626	0.297454	0.301133	0.300751	0.113357	0.117037	0.116655	0.119357	0.123036	0.122654	0.0928273	0.0965069	0.0961248	0.08859	0.09264	0.0908	0.09312	0.09718	0.09534	0.08975	0.09381	0.09196	0.0247672	0.0243968	0.0258547	0.0262368	0.0258564	0.0273144	0.0241412	0.0237608	0.0252287
1269.18	0.182947	0.176968	0.202226	0.299474	0.299848	0.302239	0.116527	0.116901	0.119292	0.122506	0.12288	0.125271	0.097248	0.0976218	0.100013	0.08852	0.09257	0.09073	0.09306	0.09711	0.09527	0.08969	0.09373	0.09189	0.028007	0.0243308	0.0285618	0.0294464	0.0257702	0.0300012	0.029745	0.0260788	0.0303098
1270.14	0.174782	0.168455	0.193428	0.296685	0.297584	0.301348	0.121902	0.122802	0.126566	0.128229	0.129129	0.132893	0.103257	0.104156	0.10792	0.08845	0.09249	0.09065	0.09299	0.09703	0.09519	0.08962	0.09366	0.09182	0.0334524	0.0303115	0.0359155	0.0352394	0.0320986	0.0377025	0.0370318	0.0338909	0.0394949
1271.11	0.162361	0.155591	0.180325	0.29197	0.294997	0.299183	0.129609	0.132636	0.136822	0.136379	0.139406	0.143592	0.111645	0.114672	0.118858	0.08837	0.0924	0.09057	0.09292	0.09695	0.09511	0.08955	0.09358	0.09175	0.0412388	0.0402362	0.046252	0.0434586	0.042456	0.0484818	0.0462013	0.0451987	0.0512145
1272.07	0.147353	0.139807	0.163639	0.287826	0.293615	0.296912	0.140473	0.146262	0.149559	0.148019	0.153807	0.157104	0.124187	0.129976	0.133273	0.0883	0.09232	0.09048	0.09285	0.09687	0.09503	0.08948	0.0935	0.09167	0.052173	0.0539417	0.0590787	0.0551686	0.0569373	0.0620743	0.0582433	0.060012	0.065139
1273.04	0.131589	0.123733	0.146371	0.284699	0.29289	0.295018	0.15311	0.1613	0.163428	0.160966	0.169157	0.171285	0.138328	0.146519	0.148647	0.08822	0.09223	0.0904	0.09277	0.09679	0.09495	0.08941	0.09342	0.09159	0.0648899	0.0690705	0.0730284	0.0681965	0.0723671	0.0763351	0.0712821	0.0754628	0.0794207
1274	0.11731	0.110441	0.131507	0.284515	0.293014	0.294812	0.167205	0.175704	0.177503	0.174074	0.182572	0.184371	0.153008	0.161506	0.163305	0.08814	0.09214	0.09031	0.0927	0.0967	0.09487	0.08934	0.09334	0.0915	0.0790654	0.0835641	0.0871925	0.0813737	0.0858723	0.0895008	0.0844192	0.0889179	0.0925564
1274.96	0.104958	0.100029	0.119813	0.285331	0.293299	0.29498	0.180373	0.188342	0.190022	0.185303	0.193271	0.194951	0.165519	0.173487	0.175167	0.08805	0.09205	0.09022	0.09262	0.09661	0.09478	0.08926	0.09325	0.09142	0.0923235	0.0962916	0.0998018	0.0926828	0.0966608	0.100171	0.0957238	0.0997019	0.103212
1275.93	0.0959265	0.0941684	0.113679	0.28591	0.292947	0.294274	0.189983	0.19702	0.198347	0.191741	0.198778	0.200105	0.17223	0.179267	0.180594	0.08797	0.09195	0.09012	0.09253	0.09652	0.09469	0.08918	0.09316	0.09133	0.102013	0.10507	0.108227	0.0992112	0.102258	0.105415	0.102531	0.105588	0.108745
1276.89	0.08961	0.091199	0.111208	0.286065	0.292486	0.293799	0.196455	0.202876	0.204189	0.194866	0.201287	0.2026	0.174856	0.181278	0.182591	0.08788	0.09186	0.09003	0.09245	0.09643	0.0946	0.0891	0.09307	0.09124	0.108575	0.111016	0.114159	0.102416	0.104857	0.108	0.106083	0.108535	0.111678
1277.86	0.0862065	0.0904036	0.11196	0.284311	0.291653	0.293548	0.198104	0.205446	0.207342	0.193907	0.201249	0.203145	0.172351	0.179693	0.181589	0.08779	0.09176	0.08993	0.09236	0.09633	0.0945	0.08901	0.09298	0.09115	0.110314	0.113686	0.117412	0.101547	0.104919	0.108645	0.105516	0.108888	0.112614
1278.82	0.0846987	0.0906221	0.113944	0.283311	0.292034	0.295609	0.198612	0.207335	0.21091	0.192689	0.201412	0.204987	0.169366	0.178089	0.181665	0.0877	0.09166	0.08983	0.09227	0.09623	0.0944	0.08893	0.09288	0.09106	0.110912	0.115675	0.12108	0.100419	0.105182	0.110587	0.104502	0.109275	0.114671
1279.79	0.0843887	0.0903454	0.114882	0.284923	0.294795	0.303515	0.200534	0.210406	0.219126	0.194577	0.20445	0.213169	0.170041	0.179913	0.188633	0.08761	0.09155	0.08973	0.09218	0.09613	0.09431	0.08884	0.09279	0.09096	0.112924	0.118856	0.129396	0.102397	0.10832	0.118859	0.106064	0.111986	0.122536
1280.75	0.0845161	0.0899028	0.115205	0.290071	0.300931	0.312914	0.205555	0.216415	0.228398	0.200169	0.211028	0.223011	0.174867	0.185726	0.197709	0.08751	0.09145	0.08962	0.09209	0.09603	0.0942	0.08875	0.09269	0.09086	0.118045	0.124965	0.138778	0.108079	0.114998	0.128811	0.111387	0.118306	0.132119
1281.71	0.0841289	0.089267	0.114552	0.299761	0.311151	0.317712	0.215632	0.227022	0.233583	0.210494	0.221884	0.228445	0.185209	0.196599	0.20316	0.08741	0.09134	0.08952	0.09199	0.09593	0.0941	0.08865	0.09259	0.09076	0.128222	0.135682	0.144063	0.118504	0.125954	0.134345	0.122224	0.129675	0.138065
1282.68	0.0831034	0.0879983	0.113022	0.31561	0.327474	0.326673	0.232506	0.24437	0.24357	0.227611	0.239475	0.238675	0.202588	0.214452	0.213652	0.08731	0.09123	0.08941	0.0919	0.09582	0.09399	0.08856	0.09248	0.09066	0.145196	0.15314	0.15416	0.135711	0.143655	0.144685	0.139915	0.147859	0.148878
1283.64	0.0803062	0.0850775	0.110156	0.338478	0.35105	0.346415	0.258172	0.270744	0.266109	0.2534	0.265973	0.261338	0.228322	0.240894	0.236259	0.08721	0.09112	0.0893	0.0918	0.09571	0.09389	0.08846	0.09237	0.09055	0.170962	0.179624	0.176809	0.1616	0.170263	0.167448	0.165915	0.174577	0.171762
1284.61	0.0778142	0.0822161	0.107259	0.371643	0.385187	0.377286	0.293828	0.307373	0.299472	0.289426	0.302971	0.29507	0.264383	0.277928	0.270026	0.08711	0.09101	0.08919	0.0917	0.0956	0.09378	0.08836	0.09227	0.09045	0.206718	0.216363	0.210282	0.197726	0.207371	0.20129	0.201722	0.211357	0.205275
1285.57	0.0774771	0.0806311	0.105271	0.419972	0.434674	0.422813	0.342495	0.357197	0.345336	0.339341	0.354043	0.342182	0.314702	0.329404	0.317543	0.087	0.09089	0.08907	0.09159	0.09548	0.09367	0.08826	0.09216	0.09034	0.255495	0.266307	0.256266	0.247751	0.258563	0.248512	0.250556	0.261358	0.251317
1286.54	0.0788439	0.080788	0.10483	0.479552	0.496219	0.480076	0.400708	0.417375	0.401232	0.398764	0.415431	0.399288	0.374723	0.39139	0.375247	0.08689	0.09077	0.08896	0.09149	0.09537	0.09355	0.08816	0.09204	0.09023	0.313818	0.326605	0.312272	0.307274	0.320061	0.305738	0.308715	0.321502	0.307169
1287.5	0.0814029	0.0832647	0.105998	0.550099	0.571539	0.54925	0.468696	0.490136	0.467847	0.466835	0.488274	0.465985	0.444101	0.465541	0.443251	0.08678	0.09065	0.08884	0.09138	0.09525	0.09344	0.08806	0.09193	0.09011	0.381916	0.399486	0.379007	0.375455	0.393024	0.372545	0.376182	0.393752	0.373283
1288.46	0.0871855	0.0889415	0.11145	0.625585	0.650397	0.624569	0.5384	0.563212	0.537384	0.536644	0.561456	0.535628	0.514136	0.538947	0.513119	0.08667	0.09053	0.08872	0.09127	0.09513	0.09332	0.08795	0.09181	0.09	0.45173	0.472682	0.448664	0.445374	0.466326	0.442308	0.445135	0.466087	0.442069
1289.43	0.0970864	0.0974872	0.122877	0.702669	0.724253	0.703705	0.605583	0.627167	0.606619	0.605182	0.626766	0.606218	0.579792	0.601376	0.580828	0.08656	0.09041	0.0886	0.09116	0.09501	0.0932	0.08784	0.09169	0.08988	0.519023	0.536757	0.518019	0.514022	0.531756	0.513018	0.511819	0.529553	0.510815
1290.39	0.114003	0.113114	0.143283	0.773007	0.789734	0.776528	0.659004	0.675731	0.662525	0.659893	0.67662	0.663414	0.629724	0.646451	0.633245	0.08645	0.09029	0.08847	0.09105	0.09489	0.09308	0.08773	0.09157	0.08976	0.572554	0.585441	0.574055	0.568843	0.58173	0.570334	0.563951	0.576838	0.565442
1291.36	0.140908	0.140274	0.176257	0.82799	0.841865	0.832567	0.687082	0.700957	0.691659	0.687717	0.701592	0.692293	0.651733	0.665608	0.656309	0.08633	0.09016	0.08835	0.09093	0.09476	0.09295	0.08762	0.09145	0.08964	0.600752	0.610797	0.603309	0.596787	0.606832	0.599343	0.588343	0.598388	0.590899
1292.32	0.178473	0.177916	0.221733	0.865073	0.876911	0.870514	0.686601	0.698438	0.692041	0.687157	0.698995	0.692598	0.64334	0.655178	0.648781	0.08621	0.09003	0.08822	0.09082	0.09464	0.09283	0.08751	0.09133	0.08952	0.600391	0.608408	0.603821	0.596337	0.604355	0.599768	0.583964	0.591982	0.587395
1293.29	0.230783	0.228789	0.283994	0.877309	0.888474	0.884324	0.646527	0.657692	0.653542	0.64852	0.659685	0.655535	0.593315	0.60448	0.60033	0.08609	0.0899	0.08809	0.0907	0.09451	0.0927	0.0874	0.0912	0.0894	0.560437	0.567792	0.565452	0.55782	0.565175	0.562835	0.540998	0.548363	0.546013
1294.25	0.290573	0.285947	0.353572	0.869292	0.879565	0.877738	0.578719	0.588992	0.587165	0.583346	0.593618	0.591791	0.51572	0.525993	0.524166	0.08597	0.08977	0.08796	0.09058	0.09438	0.09257	0.08728	0.09108	0.08927	0.492749	0.499222	0.499205	0.492766	0.499238	0.499221	0.472627	0.479099	0.479082
1295.21	0.355327	0.346411	0.426313	0.841317	0.848525	0.85051	0.48599	0.493198	0.495183	0.494906	0.502114	0.504099	0.415004	0.422212	0.424197	0.08585	0.08964	0.08783	0.09046	0.09424	0.09244	0.08716	0.09095	0.08914	0.40014	0.403558	0.407353	0.404446	0.407874	0.411659	0.383742	0.38716	0.390955
1296.18	0.414886	0.401023	0.490553	0.799336	0.802961	0.808546	0.38445	0.388075	0.39366	0.398313	0.401939	0.407523	0.308783	0.312409	0.317993	0.08573	0.0895	0.0877	0.09034	0.09411	0.09231	0.08704	0.09082	0.08902	0.29872	0.298575	0.30596	0.307973	0.307829	0.315213	0.289341	0.289186	0.296571
1297.14	0.459384	0.44097	0.53392	0.748161	0.748263	0.755655	0.288777	0.288879	0.296271	0.307191	0.307293	0.314685	0.214241	0.214343	0.221735	0.0856	0.08937	0.08757	0.09021	0.09397	0.09217	0.08692	0.09069	0.08889	0.203177	0.199509	0.208701	0.216981	0.213323	0.222515	0.204405	0.200736	0.209929
1298.11	0.485432	0.462229	0.554379	0.691515	0.689428	0.697882	0.206083	0.203996	0.21245	0.229286	0.227199	0.235654	0.137136	0.135049	0.143503	0.08548	0.08923	0.08743	0.09009	0.09384	0.09204	0.0868	0.09055	0.08875	0.120603	0.114766	0.12502	0.139196	0.133359	0.143614	0.133875	0.128038	0.138293
1299.07	0.484351	0.455301	0.542813	0.633169	0.632732	0.641921	0.148818	0.148381	0.15757	0.177869	0.177431	0.18662	0.0903564	0.0899192	0.0991079	0.08535	0.08909	0.08729	0.08996	0.0937	0.0919	0.08668	0.09042	0.08862	0.063468	0.0592909	0.0702795	0.0879087	0.0837315	0.0947201	0.0887908	0.0846136	0.0956023
1300.04	0.462143	0.427791	0.508088	0.577787	0.579732	0.589634	0.115644	0.117589	0.127491	0.149996	0.151941	0.161843	0.0696987	0.0716436	0.0815461	0.08522	0.08895	0.08715	0.08983	0.09356	0.09176	0.08655	0.09028	0.08849	0.0304238	0.0286386	0.0403411	0.060166	0.0583808	0.0700833	0.0658517	0.0640666	0.0757591
1301	0.418483	0.380418	0.452181	0.53141	0.533934	0.545319	0.112927	0.115451	0.126836	0.150992	0.153516	0.164901	0.0792287	0.0817531	0.0931378	0.08509	0.08881	0.08701	0.0897	0.09342	0.09162	0.08643	0.09015	0.08835	0.027837	0.0266414	0.039826	0.0612918	0.0600962	0.0732809	0.0688043	0.0676087	0.0807934
1301.96	0.363674	0.324347	0.38665	0.493677	0.495765	0.508375	0.130003	0.132092	0.144702	0.16933	0.171419	0.184028	0.107026	0.109115	0.121725	0.08496	0.08867	0.08687	0.08957	0.09327	0.09148	0.0863	0.09001	0.08821	0.0450429	0.0434218	0.0578315	0.0797596	0.0781485	0.0925483	0.0874813	0.0858602	0.10027
1302.93	0.306283	0.270274	0.322508	0.467659	0.467342	0.479965	0.161376	0.161059	0.173682	0.197385	0.197067	0.209691	0.145151	0.144834	0.157457	0.08483	0.08852	0.08673	0.08943	0.09313	0.09134	0.08617	0.08987	0.08808	0.0765464	0.0725387	0.0869524	0.107955	0.103937	0.118351	0.115018	0.111001	0.125414
1303.89	0.251199	0.220332	0.26337	0.449104	0.447105	0.459106	0.197905	0.195906	0.207907	0.228772	0.226773	0.238774	0.185734	0.183734	0.195735	0.08469	0.08838	0.08659	0.0893	0.09298	0.0912	0.08604	0.08972	0.08794	0.113215	0.107526	0.121317	0.139472	0.133793	0.147574	0.145182	0.139503	0.153284
1304.86	0.207467	0.181573	0.218338	0.434285	0.43512	0.446175	0.226818	0.227653	0.238708	0.252712	0.253547	0.264602	0.215947	0.216783	0.227837	0.08456	0.08823	0.08644	0.08917	0.09284	0.09105	0.08591	0.08958	0.08779	0.142258	0.139423	0.152268	0.163542	0.160707	0.173552	0.167345	0.16451	0.177355
1305.82	0.171177	0.149927	0.181964	0.424684	0.428631	0.438245	0.253506	0.257454	0.267068	0.274757	0.278704	0.288318	0.24272	0.246667	0.256281	0.08442	0.08808	0.0863	0.08903	0.09269	0.0909	0.08578	0.08944	0.08765	0.169086	0.169374	0.180768	0.185727	0.186014	0.197418	0.187835	0.188122	0.199526
1306.79	0.142008	0.123995	0.15235	0.421606	0.424731	0.432358	0.279598	0.282723	0.29035	0.297611	0.300735	0.308363	0.269257	0.272381	0.280009	0.08429	0.08793	0.08615	0.08889	0.09254	0.09076	0.08565	0.08929	0.08751	0.195308	0.194793	0.2042	0.208721	0.208195	0.217603	0.210416	0.209901	0.219309
1307.75	0.118234	0.102816	0.127954	0.421853	0.42393	0.428982	0.303619	0.305696	0.310748	0.319037	0.321114	0.326166	0.293899	0.295976	0.301028	0.08415	0.08778	0.086	0.08875	0.09239	0.09061	0.08551	0.08915	0.08736	0.219469	0.217916	0.224748	0.230287	0.228724	0.235556	0.232162	0.230599	0.237441
1308.71	0.0979868	0.0849397	0.106305	0.422434	0.426825	0.427953	0.324447	0.328839	0.329966	0.337494	0.341886	0.343014	0.316129	0.320521	0.321649	0.08401	0.08763	0.08585	0.08861	0.09224	0.09046	0.08538	0.089	0.08722	0.240437	0.241209	0.244116	0.248884	0.249646	0.252554	0.251231	0.252002	0.25491
1309.68	0.0813774	0.0704325	0.0882912	0.424028	0.43025	0.428204	0.34265	0.348872	0.346826	0.353595	0.359817	0.357771	0.335736	0.341959	0.339913	0.08387	0.08748	0.0857	0.08847	0.09208	0.09031	0.08524	0.08885	0.08707	0.25878	0.261392	0.261126	0.265125	0.267737	0.267461	0.268051	0.270663	0.270397
1310.64	0.0680891	0.0592204	0.0743018	0.427623	0.431054	0.429135	0.359534	0.362965	0.361046	0.368402	0.371834	0.369914	0.353321	0.356752	0.354833	0.08373	0.08733	0.08555	0.08833	0.09193	0.09015	0.0851	0.0887	0.08692	0.275804	0.275635	0.275496	0.280072	0.279904	0.279764	0.283433	0.283265	0.283125
1311.61	0.0575384	0.0502725	0.0633687	0.429302	0.42978	0.429174	0.371764	0.372241	0.371635	0.37903	0.379507	0.378901	0.365933	0.366411	0.365805	0.08359	0.08717	0.0854	0.08819	0.09177	0.09	0.08496	0.08855	0.08678	0.288174	0.285071	0.286235	0.29084	0.287737	0.288901	0.294316	0.291203	0.292367
1312.57	0.0492093	0.0426202	0.0549954	0.425141	0.426064	0.426513	0.375932	0.376854	0.377304	0.382521	0.383443	0.383893	0.370146	0.371068	0.371518	0.08345	0.08702	0.08525	0.08805	0.09162	0.08985	0.08483	0.0884	0.08663	0.292482	0.289834	0.292054	0.294471	0.291823	0.294043	0.297403	0.294755	0.296975
1313.54	0.0425826	0.0360024	0.0481578	0.416155	0.419469	0.421262	0.373572	0.376887	0.378679	0.380152	0.383467	0.385259	0.367997	0.371312	0.373104	0.08331	0.08687	0.0851	0.0879	0.09146	0.08969	0.08469	0.08825	0.08648	0.290262	0.290017	0.293579	0.292252	0.292007	0.295569	0.294206	0.293961	0.297523
1314.5	0.0370225	0.0296518	0.0415229	0.400879	0.409648	0.413189	0.363857	0.372625	0.376166	0.371227	0.379996	0.383537	0.359356	0.368125	0.371666	0.08316	0.08671	0.08494	0.08776	0.0913	0.08953	0.08455	0.08809	0.08633	0.280697	0.285915	0.291226	0.283467	0.288696	0.294007	0.283917	0.289145	0.294446
1315.46	0.0323623	0.0241187	0.0355203	0.382829	0.395975	0.401507	0.350466	0.363613	0.369145	0.35871	0.371857	0.377388	0.347308	0.360455	0.365987	0.08302	0.08655	0.08479	0.08761	0.09114	0.08938	0.08441	0.08794	0.08617	0.267446	0.277063	0.284355	0.2711	0.280717	0.288008	0.27012	0.279737	0.287039
1316.43	0.0282386	0.0197506	0.0299688	0.3654	0.37714	0.385397	0.337162	0.348902	0.357159	0.34565	0.35739	0.365647	0.335431	0.347171	0.355429	0.08288	0.0864	0.08463	0.08746	0.09098	0.08922	0.08426	0.08778	0.08602	0.254282	0.262502	0.272529	0.25819	0.26641	0.276427	0.256478	0.264698	0.274715
1317.39	0.0246069	0.0163887	0.0253691	0.347484	0.354856	0.364721	0.322877	0.33025	0.340114	0.331096	0.338468	0.348332	0.322115	0.329487	0.339352	0.08273	0.08624	0.08448	0.08732	0.09082	0.08906	0.08412	0.08763	0.08587	0.240147	0.24401	0.255634	0.243776	0.247648	0.259272	0.241978	0.24584	0.257464
1318.36	0.0212814	0.014325	0.0226025	0.330036	0.329822	0.337242	0.308755	0.308541	0.315961	0.315711	0.315497	0.322918	0.307434	0.30722	0.31464	0.08259	0.08608	0.08432	0.08717	0.09066	0.0889	0.08398	0.08747	0.08571	0.226165	0.222461	0.231641	0.228541	0.224837	0.234018	0.227864	0.22416	0.23334
1319.32	0.0183231	0.0125558	0.0203462	0.310259	0.303773	0.308431	0.291936	0.28545	0.290107	0.297703	0.291217	0.295875	0.289912	0.283427	0.288084	0.08244	0.08592	0.08416	0.08702	0.0905	0.08874	0.08383	0.08731	0.08556	0.209496	0.19953	0.205947	0.210683	0.200717	0.207135	0.21112	0.201155	0.207562
1320.28	0.0157568	0.00976079	0.0172601	0.283832	0.278984	0.284046	0.268075	0.263228	0.26829	0.274071	0.269224	0.274286	0.266572	0.261724	0.266786	0.08229	0.08576	0.08401	0.08687	0.09034	0.08858	0.08369	0.08716	0.0854	0.185785	0.177468	0.18428	0.187201	0.178884	0.185706	0.187206	0.178888	0.18571
1321.25	0.0135046	0.00718243	0.0142775	0.256278	0.254537	0.260973	0.242774	0.241032	0.247468	0.249096	0.247354	0.253791	0.242001	0.240259	0.246695	0.08215	0.0856	0.08385	0.08672	0.09017	0.08842	0.08355	0.087	0.08525	0.160624	0.155432	0.163618	0.162376	0.157184	0.165371	0.161849	0.156658	0.164844
1322.21	0.011507	0.005882	0.0120231	0.232673	0.229687	0.238009	0.221166	0.21818	0.226502	0.226791	0.223805	0.232127	0.22065	0.217664	0.225986	0.082	0.08544	0.08369	0.08657	0.09001	0.08826	0.0834	0.08684	0.08509	0.139166	0.13274	0.142812	0.140221	0.133795	0.143867	0.140313	0.133888	0.143959
1323.18	0.00973389	0.00508265	0.0100828	0.210032	0.20618	0.215168	0.200298	0.196446	0.205434	0.204949	0.201098	0.210085	0.199949	0.196097	0.205085	0.08185	0.08528	0.08353	0.08642	0.08985	0.0881	0.08326	0.08668	0.08493	0.118448	0.111166	0.121904	0.118529	0.111248	0.121985	0.119452	0.112181	0.122918
1324.14	0.00809009	0.00435575	0.00815529	0.186208	0.18638	0.191589	0.178118	0.17829	0.183499	0.181852	0.182025	0.187233	0.178052	0.178225	0.183434	0.08171	0.08512	0.08337	0.08627	0.08968	0.08794	0.08311	0.08652	0.08478	0.0964076	0.0931703	0.100129	0.095582	0.0923446	0.0992934	0.0970565	0.0938192	0.100768
1325.11	0.00671009	0.00371788	0.00652832	0.163773	0.167686	0.168698	0.157063	0.160976	0.161987	0.160055	0.163969	0.16498	0.157245	0.161158	0.162169	0.08156	0.08496	0.08322	0.08612	0.08952	0.08777	0.08297	0.08636	0.08462	0.075503	0.0760163	0.0787675	0.0739352	0.0744486	0.0772097	0.0756773	0.0762007	0.0789518
1326.07	0.00575277	0.00309143	0.00541575	0.145091	0.147509	0.147539	0.139338	0.141756	0.141786	0.141999	0.144418	0.144447	0.139675	0.142093	0.142123	0.08141	0.0848	0.08306	0.08597	0.08935	0.08761	0.08282	0.0862	0.08446	0.0579278	0.0569562	0.0587257	0.0560291	0.0550676	0.0568371	0.057502	0.0565405	0.05831
1327.03	0.00504971	0.00233036	0.00473805	0.128643	0.128177	0.128386	0.123594	0.123127	0.123336	0.126313	0.125846	0.126056	0.123905	0.123439	0.123648	0.08127	0.08464	0.0829	0.08581	0.08918	0.08745	0.08267	0.08604	0.0843	0.0423237	0.038487	0.0404365	0.0405031	0.0366664	0.0386058	0.0415027	0.037666	0.0396155
1328	0.00450745	0.00113861	0.00460158	0.113706	0.111171	0.11208	0.109198	0.106664	0.107573	0.112567	0.110033	0.110942	0.109104	0.10657	0.107479	0.08112	0.08447	0.08274	0.08566	0.08902	0.08728	0.08253	0.08588	0.08415	0.0280783	0.0221939	0.0248328	0.0269071	0.0210127	0.0236617	0.0275155	0.021631	0.02427
1328.96	0.00405991	-0.000111321	0.00466249	0.100269	0.0964442	0.0979702	0.0962087	0.0923842	0.0939103	0.10038	0.0965555	0.0980816	0.0956061	0.0917817	0.0933077	0.08097	0.08431	0.08258	0.08551	0.08885	0.08712	0.08238	0.08572	0.08399	0.0152387	0.00807425	0.0113303	0.01487	0.00770548	0.0109616	0.0151361	0.00797164	0.0112277
1329.93	0.00360747	-0.00109743	0.00467417	0.0880692	0.084844	0.0858667	0.0844618	0.0812365	0.0822592	0.0891667	0.0859414	0.0869641	0.0833951	0.0801698	0.0811925	0.08082	0.08415	0.08242	0.08536	0.08869	0.08695	0.08223	0.08556	0.08383	0.00364176	-0.00291347	-0.000160783	0.00380667	-0.00274856	1.41245e-05	0.00387549	-0.00267975	7.29415e-05
1330.89	0.00315726	-0.0019642	0.00445122	0.0771444	0.0751596	0.075225	0.0739871	0.0720024	0.0720678	0.0791086	0.0771238	0.0771892	0.0726932	0.0707084	0.0707738	0.08067	0.08399	0.08226	0.0852	0.08852	0.08679	0.08209	0.0854	0.08367	-0.00668286	-0.0119876	-0.0101922	-0.0060914	-0.0113962	-0.00960079	-0.00626458	-0.0115593	-0.00976397
1331.86	0.0026736	-0.00272081	0.00361755	0.0675521	0.0664845	0.065407	0.0648785	0.0638109	0.0627334	0.0702729	0.0692053	0.0681278	0.0639346	0.0628669	0.0617894	0.08053	0.08383	0.0821	0.08505	0.08835	0.08662	0.08194	0.08524	0.08351	-0.0156515	-0.0200191	-0.0193666	-0.0147771	-0.0191447	-0.0184922	-0.0153934	-0.019761	-0.0191085
1332.82	0.00218528	-0.0034511	0.00249867	0.0589663	0.0587535	0.0565041	0.056781	0.0565682	0.0543188	0.0624174	0.0622046	0.0599552	0.0564676	0.0562548	0.0540054	0.08038	0.08366	0.08194	0.0849	0.08818	0.08646	0.08179	0.08508	0.08335	-0.023599	-0.0270918	-0.0276212	-0.0224826	-0.0259754	-0.0265048	-0.0235765	-0.0270792	-0.0275987
1333.78	0.00168786	-0.00435108	0.00117848	0.0509975	0.0514334	0.0482749	0.0493096	0.0497455	0.046587	0.0553486	0.0557845	0.052626	0.049819	0.0502549	0.0470964	0.08023	0.0835	0.08178	0.08475	0.08802	0.0863	0.08165	0.08492	0.08319	-0.0309204	-0.0337545	-0.035193	-0.0294014	-0.0322355	-0.033674	-0.0309667	-0.0338008	-0.0352293
1334.75	0.00124528	-0.0050934	5.70582e-06	0.0438937	0.045023	0.0410794	0.0426484	0.0437777	0.0398341	0.0489871	0.0501164	0.0461728	0.043888	0.0450173	0.0410737	0.08009	0.08334	0.08162	0.08459	0.08785	0.08613	0.0815	0.08476	0.08304	-0.0374416	-0.0395623	-0.0417859	-0.0356029	-0.0377336	-0.0399572	-0.0374115	-0.0395422	-0.0417657
1335.71	0.00090987	-0.0053953	-0.000559533	0.037674	0.0399333	0.0352099	0.0367641	0.0390235	0.0343	0.0430693	0.0453286	0.0406052	0.0382335	0.0404929	0.0357694	0.07994	0.08318	0.08146	0.08444	0.08768	0.08597	0.08135	0.08459	0.08288	-0.0431759	-0.0441565	-0.04716	-0.0413707	-0.0423514	-0.0453648	-0.0428502	-0.0438308	-0.0468443
1336.68	0.000711956	-0.00531895	-0.000767555	0.032636	0.0358947	0.030628	0.0319241	0.0351828	0.0299161	0.037955	0.0412137	0.035947	0.0334036	0.0366623	0.0313956	0.07979	0.08302	0.08131	0.08429	0.08752	0.0858	0.08121	0.08443	0.08272	-0.0478659	-0.0478372	-0.0513939	-0.046335	-0.0463063	-0.049853	-0.0472499	-0.0472112	-0.0507679
1337.64	0.000746266	-0.00457351	-0.00058612	0.0294101	0.0330453	0.0275838	0.0286639	0.032299	0.0268376	0.0339836	0.0376188	0.0321573	0.0299962	0.0336314	0.0281699	0.07965	0.08286	0.08115	0.08414	0.08735	0.08564	0.08106	0.08427	0.08256	-0.0509861	-0.050561	-0.0543124	-0.0501564	-0.0497312	-0.0534827	-0.0503093	-0.0498841	-0.0536356
1338.61	0.000871971	-0.00393517	-0.000402794	0.0270179	0.0305728	0.0255043	0.0261459	0.0297008	0.0246323	0.0309531	0.034508	0.0294395	0.0274207	0.0309756	0.0259071	0.0795	0.0827	0.08099	0.08399	0.08718	0.08547	0.08092	0.08411	0.0824	-0.0533541	-0.0529992	-0.0563577	-0.0530369	-0.052672	-0.0560305	-0.0526922	-0.0523273	-0.0556858
1339.57	0.0010465	-0.00434443	-0.000904286	0.0248355	0.0276547	0.0240442	0.0237889	0.0266081	0.0229977	0.0291799	0.0319991	0.0283886	0.0257397	0.0285589	0.0249485	0.07936	0.08254	0.08083	0.08384	0.08702	0.08531	0.08077	0.08395	0.08225	-0.0555711	-0.0559319	-0.0578323	-0.0546601	-0.0550209	-0.0569214	-0.054816	-0.0551768	-0.0570873
1340.53	0.0010698	-0.00501748	-0.00116093	0.0224302	0.0244596	0.0227702	0.0213604	0.0233898	0.0217004	0.0274477	0.0294771	0.0277877	0.0235911	0.0256205	0.0239311	0.07921	0.08238	0.08068	0.08368	0.08685	0.08515	0.08063	0.08379	0.08209	-0.0578496	-0.0589902	-0.0589796	-0.0562323	-0.0573729	-0.0573623	-0.0570377	-0.0581682	-0.0581577
1341.5	0.000495083	-0.00560585	-4.04829e-05	0.0184146	0.0206408	0.0212268	0.0179195	0.0201457	0.0207317	0.0240205	0.0262466	0.0268326	0.0184551	0.0206813	0.0212672	0.07907	0.08222	0.08052	0.08353	0.08668	0.08498	0.08048	0.08363	0.08193	-0.0611505	-0.0620743	-0.0597883	-0.0595095	-0.0604334	-0.0581474	-0.0603216	-0.0612454	-0.0589595
1342.46	1.99514e-05	-0.00574408	0.00116261	0.0150296	0.0169222	0.0191349	0.0150096	0.0169023	0.0191149	0.0207737	0.0226663	0.024879	0.013867	0.0157596	0.0179723	0.07893	0.08206	0.08036	0.08338	0.08652	0.08482	0.08034	0.08347	0.08178	-0.0639204	-0.0651577	-0.0612451	-0.0626063	-0.0638537	-0.059941	-0.0631825	-0.0644199	-0.0605172
1343.43	0.000473976	-0.00458808	0.00135342	0.014995	0.0136548	0.015467	0.014521	0.0131809	0.0149931	0.019583	0.0182429	0.0200551	0.0136415	0.0123014	0.0141136	0.07878	0.0819	0.08021	0.08323	0.08635	0.08466	0.08019	0.08331	0.08162	-0.064259	-0.0687191	-0.0652169	-0.063647	-0.0681071	-0.0646049	-0.0638965	-0.0683566	-0.0648544
1344.39	0.0010145	-0.00322532	0.00106561	0.0154859	0.0116108	0.0120133	0.0144714	0.0105963	0.0109988	0.0187112	0.0148361	0.0152386	0.0144203	0.0105452	0.0109477	0.07864	0.08175	0.08005	0.08308	0.08619	0.0845	0.08005	0.08316	0.08146	-0.0641686	-0.0711537	-0.0690512	-0.0643688	-0.0713539	-0.0692614	-0.0640637	-0.0710488	-0.0689462
1345.35	0.000956576	-0.00260029	0.000397442	0.0140695	0.0125416	0.0105274	0.0131129	0.011585	0.00957087	0.0166698	0.0151418	0.0131277	0.0136721	0.0121441	0.01013	0.0785	0.08159	0.0799	0.08293	0.08602	0.08433	0.07991	0.083	0.08131	-0.0653871	-0.070005	-0.0703291	-0.0662602	-0.0708782	-0.0712023	-0.0647317	-0.0693496	-0.0696738
1346.32	0.00065669	-0.00229791	-0.000439789	0.0122896	0.0138601	0.010091	0.0116329	0.0132034	0.00943428	0.0145875	0.016158	0.0123889	0.0127294	0.0142999	0.0105308	0.07836	0.08143	0.07975	0.08279	0.08586	0.08417	0.07977	0.08284	0.08116	-0.0667271	-0.0682266	-0.0703157	-0.0682025	-0.069702	-0.0717811	-0.0657648	-0.0672643	-0.0693534
1347.28	0.000205695	-0.00207379	-0.00126361	0.011025	0.0131501	0.011002	0.0108193	0.0129444	0.0107963	0.0130988	0.0152239	0.0130758	0.0122886	0.0144137	0.0122656	0.07822	0.08128	0.07959	0.08264	0.0857	0.08401	0.07963	0.08269	0.081	-0.0674007	-0.0683356	-0.0687937	-0.0695412	-0.0704761	-0.0709342	-0.0677372	-0.0686722	-0.0691302
1348.25	-0.000284406	-0.00236039	-0.00188929	0.00983734	0.011651	0.0113647	0.0101218	0.0119354	0.0116491	0.0121977	0.0140114	0.0137251	0.0117266	0.0135403	0.013254	0.07808	0.08112	0.07944	0.08249	0.08553	0.08385	0.07949	0.08253	0.08085	-0.0679582	-0.0691846	-0.0677909	-0.0702923	-0.0715186	-0.0701249	-0.069577	-0.0708033	-0.0694096
1349.21	-0.000678844	-0.00389626	-0.00186692	0.00841003	0.00968948	0.00853357	0.00908888	0.0103683	0.00921242	0.0123063	0.0135857	0.0124298	0.010277	0.0115564	0.0104005	0.07794	0.08097	0.07929	0.08235	0.08537	0.08369	0.07935	0.08237	0.0807	-0.0688511	-0.0706017	-0.0700776	-0.0700437	-0.0717843	-0.0712602	-0.0702331	-0.0719737	-0.0714596
1350.17	-0.000955061	-0.00551878	-0.00180953	0.0072563	0.007588	0.00505523	0.00821136	0.00854306	0.00601029	0.0127751	0.0131068	0.010574	0.00906583	0.00939753	0.00686476	0.07781	0.08082	0.07914	0.0822	0.08521	0.08354	0.07921	0.08222	0.08054	-0.0695986	-0.0722769	-0.0731297	-0.0694249	-0.0721032	-0.072966	-0.0702166	-0.0728949	-0.0737477
1351.14	-0.00100089	-0.00609515	-0.00227477	0.00719027	0.00572073	0.00255591	0.00819116	0.00672161	0.0035568	0.0132854	0.0118159	0.00865106	0.00946504	0.00799549	0.00483068	0.07767	0.08067	0.07899	0.08206	0.08505	0.08338	0.07907	0.08207	0.08039	-0.0694788	-0.0739484	-0.0754332	-0.0687746	-0.0732341	-0.0747289	-0.0692756	-0.0737452	-0.07523
1352.1	-0.000950388	-0.00627444	-0.00297885	0.00699266	0.00425933	0.00115121	0.00794305	0.00520972	0.00210159	0.0132671	0.0105338	0.00742564	0.00997151	0.00723818	0.00413006	0.07753	0.08051	0.07884	0.08191	0.08489	0.08322	0.07893	0.08191	0.08024	-0.069587	-0.0753003	-0.0767384	-0.0686429	-0.0743562	-0.0757944	-0.0686477	-0.074361	-0.0757991
1353.07	-0.000888889	-0.00631759	-0.00402522	0.00535403	0.00355912	0.00203725	0.00624292	0.00444801	0.00292614	0.0116716	0.00987672	0.00835484	0.00937925	0.00758435	0.00606248	0.0774	0.08036	0.0787	0.08177	0.08473	0.08307	0.0788	0.08176	0.0801	-0.0711571	-0.075912	-0.0757739	-0.0700984	-0.0748533	-0.0747152	-0.0699292	-0.0746841	-0.0745459
1354.03	-0.000850421	-0.00625626	-0.00480988	0.0033589	0.00344335	0.00359858	0.00420932	0.00429377	0.004449	0.00961516	0.00969961	0.00985484	0.00816878	0.00825323	0.00840846	0.07727	0.08022	0.07855	0.08163	0.08457	0.08291	0.07866	0.08161	0.07995	-0.0730607	-0.0759262	-0.074101	-0.0720148	-0.0748704	-0.0730552	-0.0718016	-0.0746671	-0.0728519
1355	-0.000923974	-0.00628721	-0.00463428	0.00146348	0.00402454	0.00473174	0.00238745	0.00494851	0.00565572	0.00775068	0.0103117	0.011019	0.00609775	0.00865882	0.00936602	0.07714	0.08007	0.07841	0.08149	0.08442	0.08276	0.07853	0.08146	0.0798	-0.0747526	-0.0751215	-0.0727543	-0.0737393	-0.0741083	-0.071741	-0.0737239	-0.0740928	-0.0717256
1355.96	-0.00103	-0.00617606	-0.00388544	0.000243258	0.00479015	0.00509676	0.00127326	0.00582015	0.00612676	0.00641932	0.0109662	0.0112728	0.0041287	0.00867559	0.0089822	0.07701	0.07992	0.07826	0.08135	0.08426	0.0826	0.0784	0.08131	0.07965	-0.0757367	-0.0740998	-0.0721332	-0.0749307	-0.0732938	-0.0713272	-0.0750599	-0.073423	-0.0714564
1356.92	-0.00111722	-0.00558275	-0.00244014	0.00102257	0.00535446	0.00352682	0.00213979	0.00647168	0.00464404	0.00660532	0.0109372	0.00910957	0.00346271	0.0077946	0.00596697	0.07688	0.07978	0.07812	0.08121	0.08411	0.08245	0.07826	0.08116	0.07951	-0.0747402	-0.0733083	-0.073476	-0.0746047	-0.0731728	-0.0733404	-0.074431	-0.0729991	-0.0731767
1357.89	-0.00118984	-0.00502114	-0.00113057	0.00201115	0.00544955	0.00139894	0.00320099	0.00663939	0.00258878	0.00703229	0.0104707	0.00642008	0.00314172	0.00658012	0.00252952	0.07675	0.07963	0.07798	0.08107	0.08395	0.0823	0.07813	0.08102	0.07937	-0.073549	-0.0729906	-0.0753912	-0.0740377	-0.0734793	-0.0758799	-0.073523	-0.0729746	-0.0753752
1358.85	-0.0012083	-0.00500176	-0.000962716	0.00147893	0.00451065	-0.000421806	0.00268722	0.00571895	0.000786492	0.00648068	0.00951241	0.00457995	0.00244164	0.00547336	0.00054091	0.07662	0.07949	0.07784	0.08093	0.0838	0.08215	0.078	0.08087	0.07922	-0.0739328	-0.0737711	-0.0770535	-0.0744493	-0.0742876	-0.07757	-0.0738676	-0.0737058	-0.0769883
1359.82	-0.00125264	-0.00519455	-0.00129198	0.00056968	0.00304258	-0.00156645	0.00182232	0.00429522	-0.000313809	0.00576423	0.00823713	0.0036281	0.00186165	0.00433455	-0.000274477	0.0765	0.07935	0.0777	0.0808	0.08365	0.082	0.07788	0.08073	0.07908	-0.0746777	-0.0750548	-0.0780138	-0.0750358	-0.0754129	-0.0783719	-0.0744785	-0.0748556	-0.0778147
1360.78	-0.0014751	-0.00540722	-0.0018688	-0.000235992	0.0011438	-0.000883777	0.0012391	0.00261889	0.000591319	0.00517123	0.00655102	0.00452345	0.0016328	0.00301259	0.000985019	0.07637	0.07921	0.07756	0.08066	0.0835	0.08185	0.07775	0.08058	0.07894	-0.0751309	-0.0765911	-0.0769687	-0.0754888	-0.076949	-0.0773266	-0.07489	-0.0763402	-0.0767278
1361.75	-0.00161957	-0.00573695	-0.00251405	-0.000678604	-0.000531389	0.000144543	0.000940967	0.00108818	0.00176411	0.00505835	0.00520556	0.0058815	0.00183545	0.00198267	0.0026586	0.07625	0.07907	0.07743	0.08053	0.08335	0.08171	0.07762	0.08044	0.0788	-0.075309	-0.0779818	-0.0756659	-0.0754717	-0.0781444	-0.0758285	-0.0750026	-0.0776754	-0.0753595
1362.71	-0.00139278	-0.00624429	-0.00285949	9.47752e-05	-0.00114417	0.000388363	0.00148755	0.000248611	0.00178114	0.00633907	0.00510013	0.00663266	0.00295427	0.00171533	0.00324786	0.07613	0.07893	0.07729	0.0804	0.0832	0.08156	0.0775	0.0803	0.07866	-0.0746424	-0.0786814	-0.0755089	-0.0740609	-0.0780999	-0.0749273	-0.074207	-0.078246	-0.0750734
1363.67	-0.00105856	-0.00684677	-0.00322295	0.000784403	-0.00114962	-5.57039e-05	0.00184296	-9.10565e-05	0.00100285	0.00763117	0.00569716	0.00679107	0.00400735	0.00207333	0.00316724	0.07601	0.07879	0.07716	0.08027	0.08305	0.08142	0.07738	0.08016	0.07853	-0.074167	-0.0788811	-0.0761571	-0.0726388	-0.0773528	-0.0746289	-0.073578	-0.078292	-0.0755681
1364.64	-0.000695633	-0.00763638	-0.00392227	4.38197e-05	-0.000491461	-0.00188684	0.000739453	0.000204172	-0.0011912	0.0076802	0.00714492	0.00574954	0.00396609	0.00343081	0.00203544	0.07589	0.07866	0.07703	0.08014	0.08291	0.08128	0.07726	0.08002	0.07839	-0.0751505	-0.0784558	-0.0782212	-0.0724598	-0.0757651	-0.0755305	-0.0743135	-0.0776088	-0.0773742
1365.6	-0.000566078	-0.00815029	-0.00458913	-0.0011339	0.00013505	-0.00384781	-0.00056782	0.000701128	-0.00328173	0.00701639	0.00828534	0.00430248	0.00345523	0.00472418	0.000741321	0.07577	0.07853	0.0769	0.08001	0.08276	0.08113	0.07714	0.07989	0.07826	-0.0763378	-0.0778289	-0.0801817	-0.0729936	-0.0744747	-0.0768275	-0.0754548	-0.0769359	-0.0792887
1366.57	-0.00122676	-0.00771698	-0.00492159	-0.00235799	-0.000200213	-0.00471725	-0.00113122	0.00102655	-0.00349049	0.005359	0.00751677	0.00299973	0.0025636	0.00472138	0.000204336	0.07566	0.07839	0.07677	0.07988	0.08262	0.08099	0.07702	0.07975	0.07813	-0.0767912	-0.0773634	-0.0802605	-0.074521	-0.0751032	-0.0779903	-0.0765103	-0.0770826	-0.0799796
1367.53	-0.00187203	-0.00705459	-0.00503828	-0.00316797	-0.000736326	-0.00508676	-0.00129594	0.0011357	-0.00321473	0.00388661	0.00631826	0.00196783	0.00187031	0.00430196	-4.84743e-05	0.07555	0.07826	0.07664	0.07976	0.08248	0.08086	0.0769	0.07962	0.078	-0.0768459	-0.0771243	-0.0798547	-0.0758734	-0.0761617	-0.0788922	-0.0772763	-0.0775647	-0.0802951
1368.5	-0.00169432	-0.00686849	-0.00497067	-0.00244178	-0.00112714	-0.00547439	-0.000747457	0.000567175	-0.00378007	0.00442671	0.00574134	0.00139409	0.0025289	0.00384353	-0.000503718	0.07543	0.07814	0.07652	0.07964	0.08234	0.08072	0.07678	0.07948	0.07787	-0.0761775	-0.0775728	-0.0803001	-0.0752133	-0.0765987	-0.0793259	-0.0770735	-0.0784589	-0.0811962
1369.46	-0.00125618	-0.00652541	-0.00467836	-0.00177348	-0.00105846	-0.00487934	-0.0005173	0.00019772	-0.00362315	0.00475193	0.00546695	0.00164608	0.00290487	0.00361989	-0.000200978	0.07532	0.07801	0.0764	0.07951	0.0822	0.08058	0.07667	0.07935	0.07774	-0.0758373	-0.0778123	-0.0800232	-0.0747581	-0.0767331	-0.0789339	-0.0768471	-0.0788121	-0.081023
1370.42	-0.000877917	-0.00536077	-0.00404896	-0.00295844	0.000402547	-0.00141916	-0.00208053	0.00128046	-0.000541242	0.00240233	0.00576332	0.00394161	0.00109052	0.00445151	0.0026298	0.07522	0.07788	0.07627	0.07939	0.08206	0.08045	0.07656	0.07922	0.07762	-0.0773005	-0.0765995	-0.0768112	-0.0769877	-0.0762967	-0.0765084	-0.0776429	-0.076942	-0.0771637
1371.39	-0.000478747	-0.00417394	-0.00332985	-0.00427082	0.00174615	0.00174323	-0.00379207	0.00222489	0.00222198	-9.68718e-05	0.00592009	0.00591718	-0.000940969	0.00507599	0.00507308	0.07511	0.07776	0.07615	0.07927	0.08193	0.08032	0.07645	0.0791	0.07749	-0.0789021	-0.0755351	-0.073928	-0.0793669	-0.0760099	-0.0744028	-0.0784196	-0.0750526	-0.0734455
1372.35	-4.14336e-05	-0.00372255	-0.00276949	-0.00431934	0.0014366	0.00135246	-0.00427791	0.00147804	0.0013939	-0.000596791	0.00515915	0.00507501	-0.00154985	0.00420609	0.00412196	0.07501	0.07764	0.07604	0.07916	0.08179	0.08019	0.07634	0.07897	0.07737	-0.0792879	-0.076162	-0.0746461	-0.0797568	-0.0766308	-0.075115	-0.0782471	-0.0751212	-0.0736053
1373.32	0.000304329	-0.00346726	-0.00225215	-0.00389561	0.000484713	-0.000431627	-0.00419994	0.000180384	-0.000735956	-0.000428348	0.00395197	0.00303564	-0.00164346	0.00273687	0.00182053	0.0749	0.07752	0.07592	0.07904	0.08166	0.08006	0.07623	0.07885	0.07725	-0.0790999	-0.0773396	-0.076656	-0.0794683	-0.077708	-0.0770244	-0.0778468	-0.0760865	-0.0754028
1374.28	0.000396215	-0.00304767	-0.00163556	-0.00313217	-0.000830142	-0.00287774	-0.00352839	-0.00122636	-0.00327395	-8.45013e-05	0.00221753	0.000169935	-0.00149662	0.000805415	-0.00124218	0.0748	0.0774	0.07581	0.07893	0.08153	0.07993	0.07613	0.07873	0.07713	-0.0783284	-0.0786264	-0.079084	-0.0790145	-0.0793125	-0.0797601	-0.0775579	-0.0778558	-0.0783034
1375.24	0.000349357	-0.00268465	-0.00124776	-0.00261489	-0.00184946	-0.00495562	-0.00296425	-0.00219882	-0.00530497	6.97641e-05	0.000835193	-0.00227096	-0.00136712	-0.000601695	-0.00370785	0.07471	0.07729	0.07569	0.07882	0.0814	0.07981	0.07602	0.0786	0.07701	-0.0776742	-0.0794888	-0.080995	-0.0787502	-0.0805648	-0.082081	-0.077606	-0.0794205	-0.0809367
1376.21	0.000171463	-0.0024719	-0.00146467	-0.00337926	-0.00151992	-0.00492521	-0.00355073	-0.00169138	-0.00509667	-0.00090736	0.000951986	-0.00245331	-0.00191459	-5.52485e-05	-0.00346054	0.07461	0.07717	0.07558	0.07871	0.08127	0.07968	0.07592	0.07849	0.0769	-0.0781607	-0.0788614	-0.0806767	-0.0796174	-0.080318	-0.0821333	-0.078754	-0.0794647	-0.0812799
1377.17	2.24775e-05	-0.00243054	-0.0020005	-0.00420892	-0.000746601	-0.00418465	-0.0042314	-0.000769079	-0.00420712	-0.00177839	0.00168394	-0.00175411	-0.00220842	0.0012539	-0.00218414	0.07451	0.07706	0.07548	0.0786	0.08115	0.07956	0.07582	0.07837	0.07678	-0.0787414	-0.0778291	-0.0796871	-0.0803784	-0.0794661	-0.0813141	-0.0798295	-0.0789172	-0.0807653
1378.14	0.000122751	-0.00285479	-0.00299194	-0.00424899	-4.33768e-05	-0.00368936	-0.00437174	-0.000166128	-0.00381211	-0.0013942	0.00281141	-0.000834571	-0.00125705	0.00294856	-0.000697422	0.07442	0.07695	0.07537	0.07849	0.08102	0.07944	0.07572	0.07825	0.07667	-0.0787917	-0.0771161	-0.0791821	-0.0798842	-0.0782086	-0.0802746	-0.0798877	-0.078212	-0.080278
1379.1	0.000298765	-0.00301898	-0.00354755	-0.00345048	0.000469429	-0.00302737	-0.00374924	0.000170665	-0.00332614	-0.000431497	0.00348841	-8.3935e-06	9.70684e-05	0.00401697	0.000520171	0.07433	0.07684	0.07527	0.07839	0.0809	0.07932	0.07563	0.07814	0.07656	-0.0780792	-0.0766693	-0.0785961	-0.0788215	-0.0774116	-0.0793284	-0.0790288	-0.0776189	-0.0795357
1380.07	0.000429231	-0.00167558	-0.00237393	-0.000709965	0.000137886	-0.00219552	-0.0011392	-0.000291345	-0.00262475	0.000965617	0.00181347	-0.000519938	0.00166396	0.00251181	0.000178409	0.07424	0.07674	0.07516	0.07829	0.08078	0.07921	0.07553	0.07803	0.07645	-0.0753792	-0.0770313	-0.0777848	-0.0773244	-0.0789665	-0.0797299	-0.0762851	-0.0779372	-0.0786906
1381.03	0.000577812	-0.000684408	-0.000813684	0.00166406	4.89397e-05	-0.000922827	0.00108624	-0.000528873	-0.00150064	0.00234846	0.000733347	-0.00023842	0.00247774	0.000862623	-0.000109143	0.07416	0.07664	0.07506	0.07819	0.08067	0.07909	0.07544	0.07792	0.07635	-0.0730738	-0.0771689	-0.0765606	-0.0758415	-0.0799367	-0.0793284	-0.0738463	-0.0779414	-0.0773432
1381.99	0.000846473	-0.00232809	0.000166145	0.000739164	0.00176662	0.0014745	-0.000107309	0.000920148	0.000628026	0.00306725	0.00409471	0.00380259	0.00057302	0.00160048	0.00130835	0.07407	0.07653	0.07497	0.07809	0.08055	0.07898	0.07535	0.07781	0.07625	-0.0741773	-0.0756099	-0.074342	-0.0750227	-0.0764553	-0.0751774	-0.0745001	-0.0759327	-0.0746648
1382.96	0.000999022	-0.00409064	0.000732298	-0.000509414	0.00320575	0.00376115	-0.00150844	0.00220673	0.00276213	0.00358122	0.00729639	0.00785179	-0.00124171	0.00247345	0.00302886	0.07399	0.07644	0.07487	0.07799	0.08044	0.07887	0.07527	0.07771	0.07614	-0.0754984	-0.0742333	-0.0721079	-0.0744088	-0.0731436	-0.0710182	-0.0754244	-0.0741492	-0.0720238
1383.92	0.000674656	-0.00366527	0.000555547	0.000603369	0.00187488	0.00492536	-7.12872e-05	0.00120022	0.00425071	0.00426864	0.00554015	0.00859064	4.7822e-05	0.00131933	0.00436982	0.07391	0.07634	0.07478	0.0779	0.08033	0.07877	0.07518	0.07761	0.07605	-0.0739813	-0.0751398	-0.0705293	-0.0736314	-0.0747899	-0.0701794	-0.0739977	-0.0751562	-0.0705457
1384.89	0.000349176	-0.00270698	0.000156758	0.00201563	0.000556821	0.00498033	0.00166645	0.000207645	0.00463115	0.00472261	0.0032638	0.00768731	0.00185887	0.000400063	0.00482357	0.07384	0.07624	0.07469	0.07781	0.08022	0.07866	0.0751	0.07751	0.07595	-0.0721735	-0.0760324	-0.0700588	-0.0730874	-0.0769562	-0.0709727	-0.0723453	-0.0762142	-0.0702306
1385.85	0.000522143	-0.002184	-2.4776e-05	0.00193282	0.00182412	0.00292592	0.00141068	0.00130198	0.00240378	0.00411682	0.00400812	0.00510992	0.0019576	0.0018489	0.00295069	0.07376	0.07615	0.0746	0.07772	0.08011	0.07856	0.07502	0.07741	0.07585	-0.0723493	-0.074848	-0.0721962	-0.0736032	-0.0761019	-0.0734501	-0.0723508	-0.0748495	-0.0721877
1386.82	0.000761476	-0.00184979	-7.35591e-05	0.00223798	0.00381617	0.000790355	0.00147651	0.00305469	2.8879e-05	0.00408778	0.00566596	0.00264015	0.00231154	0.00388972	0.000863914	0.07369	0.07606	0.07451	0.07763	0.08	0.07845	0.07494	0.07731	0.07576	-0.0722135	-0.0730053	-0.0744811	-0.0735422	-0.074334	-0.0758099	-0.0720479	-0.0728397	-0.0743155
1387.78	0.000693823	-0.00191761	3.4327e-05	0.0049472	0.00538144	0.000298459	0.00425338	0.00468762	-0.000395364	0.00686481	0.00729905	0.00221607	0.00491288	0.00534711	0.000264132	0.07362	0.07597	0.07443	0.07755	0.0799	0.07836	0.07486	0.07722	0.07567	-0.0693666	-0.0712824	-0.0748254	-0.0706852	-0.0726009	-0.0761439	-0.0693249	-0.0712506	-0.0747836
1388.74	0.00064257	-0.00197639	0.000412911	0.00786677	0.00696517	0.00136031	0.0072242	0.0063226	0.000717745	0.00984316	0.00894155	0.0033367	0.00745386	0.00655225	0.000947403	0.07355	0.07589	0.07435	0.07746	0.0798	0.07826	0.07479	0.07713	0.07558	-0.0663258	-0.0695674	-0.0736323	-0.0676168	-0.0708584	-0.0749233	-0.0665224	-0.069764	-0.0738189
1389.71	0.000779974	-0.00167219	0.00120382	0.00912781	0.00841678	0.00525792	0.00834784	0.00763681	0.00447794	0.0108	0.010089	0.00693011	0.007924	0.00721297	0.0040541	0.07349	0.07581	0.07427	0.07738	0.0797	0.07816	0.07472	0.07704	0.0755	-0.0651422	-0.0681732	-0.0697921	-0.06658	-0.069611	-0.0712299	-0.0656036	-0.0686347	-0.0702535
1390.67	0.00118607	-0.00104689	0.00234818	0.0097719	0.0103721	0.00960036	0.00858583	0.00918601	0.00841429	0.0108188	0.011419	0.0106472	0.00742372	0.0080239	0.00725218	0.07342	0.07573	0.07419	0.0773	0.07961	0.07807	0.07465	0.07695	0.07541	-0.0648342	-0.066544	-0.0657757	-0.0664812	-0.068191	-0.0674228	-0.0655295	-0.0672293	-0.066461
1391.64	0.00208859	9.09534e-05	0.00400383	0.00988399	0.0138306	0.0122581	0.0077954	0.011742	0.0101695	0.00979303	0.0137396	0.0121671	0.00588016	0.00982677	0.00825422	0.07336	0.07565	0.07412	0.07723	0.07951	0.07798	0.07458	0.07686	0.07533	-0.0655646	-0.063908	-0.0639505	-0.067437	-0.0657704	-0.0658129	-0.0663132	-0.0646465	-0.0646891
1392.6	0.00321668	0.00139535	0.0056623	0.010465	0.0175506	0.013729	0.00724831	0.0143339	0.0105124	0.00906964	0.0161552	0.0123337	0.00480268	0.0118883	0.00806673	0.07331	0.07557	0.07405	0.07715	0.07942	0.07789	0.07451	0.07678	0.07526	-0.0660617	-0.0612361	-0.0635376	-0.0680804	-0.0632648	-0.0655563	-0.066771	-0.0619555	-0.064257
1393.57	0.0044342	0.00262894	0.00684547	0.012949	0.0208107	0.0132449	0.00851484	0.0163765	0.00881072	0.0103201	0.0181818	0.010616	0.00610357	0.0139653	0.00639946	0.07325	0.0755	0.07398	0.07708	0.07933	0.07781	0.07445	0.0767	0.07518	-0.0647352	-0.0591235	-0.0651693	-0.0667599	-0.0611482	-0.067194	-0.065394	-0.0597823	-0.0658282
1394.53	0.00556478	0.00365728	0.00762011	0.0161214	0.023049	0.0124753	0.0105566	0.0174842	0.00691048	0.0124641	0.0193917	0.00881797	0.00850129	0.0154289	0.00485514	0.0732	0.07543	0.07391	0.07701	0.07925	0.07773	0.07439	0.07662	0.07511	-0.0626434	-0.0579458	-0.0669995	-0.0645459	-0.0598583	-0.068912	-0.0631918	-0.0584942	-0.0675579
1395.49	0.0063836	0.00421226	0.00773349	0.0195465	0.0230418	0.0130896	0.0131629	0.0166582	0.00670599	0.0153342	0.0188296	0.00887733	0.011813	0.0153083	0.00535611	0.07315	0.07537	0.07385	0.07695	0.07916	0.07765	0.07434	0.07655	0.07503	-0.0599871	-0.0587118	-0.067144	-0.0616158	-0.0603304	-0.0687727	-0.0603969	-0.0591116	-0.0675438
1396.46	0.00689983	0.00445757	0.00766607	0.022321	0.022052	0.0143194	0.0154212	0.0151522	0.00741955	0.0178634	0.0175944	0.00986181	0.0146549	0.0143859	0.00665331	0.0731	0.0753	0.07379	0.07688	0.07908	0.07757	0.07428	0.07648	0.07497	-0.0576788	-0.0601478	-0.0663704	-0.0590166	-0.0614856	-0.0677082	-0.0578613	-0.0603303	-0.0665529
1397.42	0.00702549	0.00447112	0.00796973	0.023275	0.0208062	0.0163357	0.0162495	0.0137807	0.00931018	0.0188039	0.0163351	0.0118646	0.0153052	0.0128365	0.00836595	0.07306	0.07524	0.07373	0.07682	0.079	0.07749	0.07423	0.07641	0.0749	-0.0568105	-0.0614593	-0.0644198	-0.0580161	-0.0626649	-0.0656254	-0.0566101	-0.0612588	-0.0642194
1398.39	0.00682711	0.00424218	0.00817754	0.0227728	0.0196889	0.0179892	0.0159456	0.0128618	0.0111621	0.0185306	0.0154467	0.0137471	0.0145952	0.0115113	0.0098117	0.07302	0.07518	0.07368	0.07676	0.07892	0.07742	0.07418	0.07634	0.07484	-0.0570744	-0.0623182	-0.0625179	-0.0582294	-0.0634733	-0.0636729	-0.056456	-0.0616999	-0.0618995
1399.35	0.00633498	0.00388004	0.00821262	0.0205051	0.0198587	0.0179143	0.0141701	0.0135238	0.0115793	0.0166251	0.0159787	0.0140343	0.0122925	0.0116461	0.00970169	0.07298	0.07512	0.07362	0.07671	0.07885	0.07735	0.07413	0.07628	0.07478	-0.0588099	-0.0615962	-0.0620407	-0.0600849	-0.0628713	-0.0633157	-0.0577886	-0.060585	-0.0610294
1400.32	0.00556975	0.00310247	0.00745665	0.0173226	0.0197192	0.0169316	0.0117529	0.0141495	0.0113618	0.0142202	0.0166168	0.0138291	0.00986598	0.0122626	0.00947495	0.07294	0.07507	0.07357	0.07666	0.07878	0.07728	0.07409	0.07621	0.07472	-0.0611871	-0.0609205	-0.0622082	-0.0624398	-0.0621632	-0.0634509	-0.0599225	-0.0596459	-0.0609435
1401.28	0.00453114	0.00158599	0.0047264	0.0137054	0.01793	0.0155219	0.00917426	0.0133988	0.0109908	0.0121194	0.016344	0.0139359	0.008979	0.0132036	0.0107955	0.07291	0.07502	0.07353	0.0766	0.07871	0.07722	0.07405	0.07615	0.07466	-0.0637357	-0.0616212	-0.0625392	-0.0644806	-0.062366	-0.0632841	-0.0625683	-0.0604437	-0.0613618
1402.24	0.00331225	-0.000436339	0.00163967	0.0104557	0.0148811	0.0133391	0.00714349	0.0115689	0.0100269	0.0108921	0.0153175	0.0137755	0.00881607	0.0132415	0.0116995	0.07288	0.07497	0.07348	0.07656	0.07864	0.07716	0.07401	0.0761	0.07461	-0.0657365	-0.0634011	-0.0634531	-0.0656679	-0.0633225	-0.0633845	-0.0648668	-0.0625314	-0.0625834
1403.21	0.00185581	-0.00316339	-0.000458784	0.00915825	0.00962525	0.0103745	0.00730243	0.00776944	0.00851865	0.0123216	0.0127886	0.0135379	0.00961703	0.010084	0.0108332	0.07285	0.07492	0.07344	0.07651	0.07858	0.0771	0.07397	0.07604	0.07456	-0.0655476	-0.0671506	-0.0649213	-0.0641884	-0.0657914	-0.0635621	-0.0650936	-0.0666966	-0.0644674
1404.17	0.000612587	-0.00562286	-0.00193309	0.00794611	0.00483483	0.00609707	0.00733352	0.00422225	0.00548448	0.013569	0.0104577	0.0117199	0.0098792	0.00676792	0.00803016	0.07283	0.07488	0.0734	0.07647	0.07852	0.07704	0.07394	0.07599	0.07451	-0.0654965	-0.0706578	-0.0679155	-0.062901	-0.0680623	-0.0653201	-0.0655755	-0.0707368	-0.0679946
1405.14	0.000179274	-0.00685341	-0.00272249	0.00462377	0.00369266	-0.00196827	0.00444449	0.00351339	-0.00214754	0.0114772	0.0105461	0.00488515	0.00734625	0.00641515	0.000754218	0.07281	0.07484	0.07337	0.07643	0.07846	0.07699	0.07391	0.07594	0.07447	-0.0683655	-0.0713266	-0.0755175	-0.0649528	-0.0679139	-0.0721049	-0.0692565	-0.0722176	-0.0764085
1406.1	6.07711e-05	-0.00702101	-0.00275687	0.00176202	0.00372061	-0.00799717	0.00170124	0.00365984	-0.00805794	0.00878302	0.0107416	-0.000976164	0.00451889	0.00647749	-0.0052403	0.07279	0.07481	0.07334	0.07639	0.07841	0.07694	0.07388	0.0759	0.07443	-0.0710888	-0.0711502	-0.0813979	-0.067607	-0.0676684	-0.0779162	-0.0725012	-0.0725626	-0.0828104
1407.07	-1.93667e-05	-0.00550702	-0.0015441	0.00209444	0.00360936	-0.00406749	0.0021138	0.00362873	-0.00404812	0.00760146	0.00911639	0.00143954	0.00363854	0.00515347	-0.00252338	0.07277	0.07477	0.07331	0.07636	0.07835	0.07689	0.07386	0.07586	0.07439	-0.0706562	-0.0711413	-0.0773581	-0.0687585	-0.0692336	-0.0754505	-0.0715014	-0.0719864	-0.0781933
1408.03	-0.000120401	-0.00370389	-0.000289564	0.00293708	0.00303527	0.00105225	0.00305748	0.00315567	0.00117265	0.00664097	0.00673916	0.00475615	0.00322664	0.00332483	0.00134182	0.07276	0.07474	0.07328	0.07632	0.0783	0.07684	0.07384	0.07582	0.07435	-0.0697025	-0.0715843	-0.0721073	-0.069679	-0.0715608	-0.0720839	-0.0697503	-0.0716321	-0.0721451
1408.99	-0.000485019	-0.00291611	-0.000308902	0.00195922	0.000485445	-0.000399982	0.00244423	0.000970464	8.50366e-05	0.00487532	0.00340155	0.00251612	0.00226812	0.000794347	-9.10798e-05	0.07275	0.07471	0.07326	0.0763	0.07826	0.0768	0.07382	0.07578	0.07432	-0.0703058	-0.0737395	-0.073175	-0.0714247	-0.0748584	-0.0742839	-0.0700318	-0.0734656	-0.072891
1409.96	-0.000839387	-0.00278891	-0.000779191	0.000834732	-0.00178169	-0.00352152	0.00167412	-0.000942299	-0.00268214	0.00362364	0.00100723	-0.000732613	0.00161392	-0.0010025	-0.00274233	0.07275	0.07469	0.07324	0.07627	0.07821	0.07676	0.0738	0.07574	0.07429	-0.0710759	-0.0756323	-0.0759221	-0.0726464	-0.0772028	-0.0774926	-0.070686	-0.0752424	-0.0755322
1410.92	-0.000880649	-0.00358132	-0.00142295	0.000913181	-0.00113635	-0.00629559	0.00179383	-0.000255706	-0.00541494	0.00449451	0.00244497	-0.00271427	0.00233613	0.000286594	-0.00487264	0.07274	0.07467	0.07322	0.07625	0.07817	0.07672	0.07379	0.07571	0.07426	-0.0709462	-0.0749257	-0.0786349	-0.0717555	-0.075725	-0.0794343	-0.0707259	-0.0746954	-0.0784046
1411.89	-0.000938558	-0.00475652	-0.00191948	0.000836844	-0.000205472	-0.00782655	0.0017754	0.000733086	-0.00688799	0.00559336	0.00455104	-0.00307003	0.00275633	0.00171401	-0.00590707	0.07274	0.07465	0.07321	0.07623	0.07813	0.07669	0.07378	0.07569	0.07424	-0.0709646	-0.0739169	-0.080098	-0.0706366	-0.073579	-0.07976	-0.0709361	-0.0738885	-0.0800595
1412.85	-0.00140469	-0.00603936	-0.00170238	-0.000831029	-0.0013422	-0.00560412	0.000573665	6.24969e-05	-0.00419943	0.00520833	0.00469716	0.000435238	0.000871348	0.000360181	-0.00390174	0.07274	0.07463	0.07319	0.07621	0.0781	0.07666	0.07377	0.07566	0.07422	-0.0721663	-0.0745675	-0.0773894	-0.0710017	-0.0734028	-0.0762248	-0.0720637	-0.0744648	-0.0772868
1413.82	-0.00179073	-0.00690376	-0.00123131	-0.00250378	-0.00273803	-0.00245547	-0.000713054	-0.000947305	-0.000664743	0.00439998	0.00416573	0.00444829	-0.00127247	-0.00150672	-0.00122416	0.07275	0.07462	0.07319	0.07619	0.07807	0.07663	0.07377	0.07564	0.0742	-0.0734631	-0.0755673	-0.0738547	-0.07179	-0.0739043	-0.0721817	-0.0732648	-0.0753691	-0.0736465
1414.78	-0.00162461	-0.00642853	-0.000726854	-0.0028096	-0.00328797	-0.000401934	-0.00118499	-0.00166336	0.00122268	0.00361893	0.00314056	0.00602659	-0.00208275	-0.00256112	0.000324919	0.07276	0.07461	0.07318	0.07618	0.07804	0.07661	0.07376	0.07562	0.07419	-0.073945	-0.0762734	-0.0719573	-0.0725611	-0.0748994	-0.0705834	-0.0737929	-0.0761312	-0.0718152
1415.74	-0.00124912	-0.00552385	-0.000339906	-0.00254072	-0.00323472	0.000649261	-0.0012916	-0.0019856	0.00189838	0.00298312	0.00228913	0.00617311	-0.00220081	-0.00289481	0.000989167	0.07277	0.07461	0.07318	0.07617	0.07801	0.07658	0.07377	0.0756	0.07417	-0.0740616	-0.0765956	-0.0712816	-0.0731869	-0.0757209	-0.0704069	-0.0740443	-0.0765683	-0.0712543
1416.71	-0.000811238	-0.00479077	-0.00036297	-0.00215261	-0.00224155	-0.000287878	-0.00134137	-0.00143032	0.00052336	0.00263816	0.00254922	0.0045029	-0.00178964	-0.00187858	7.50915e-05	0.07279	0.0746	0.07318	0.07617	0.07799	0.07656	0.07377	0.07559	0.07417	-0.0741314	-0.0760303	-0.0726566	-0.0735318	-0.0754408	-0.0720571	-0.0742804	-0.0761893	-0.0728157
1417.67	-0.000426286	-0.00423548	-0.000591812	-0.00128375	-0.000941746	-0.00199841	-0.000857466	-0.00051546	-0.00157212	0.00295173	0.00329374	0.00223707	-0.000691941	-0.000349934	-0.0014066	0.0728	0.0746	0.07319	0.07617	0.07797	0.07655	0.07378	0.07558	0.07416	-0.0736575	-0.0751155	-0.0747621	-0.0732183	-0.0746763	-0.0743129	-0.0740202	-0.0754782	-0.0751148
1418.64	-0.000337571	-0.00423574	-0.00104143	0.000326017	0.000133371	-0.00379899	0.000663588	0.000470942	-0.00346142	0.00456176	0.00436911	0.00043675	0.00136745	0.0011748	-0.00275756	0.07283	0.07461	0.07319	0.07617	0.07795	0.07654	0.07379	0.07557	0.07416	-0.0721664	-0.0741391	-0.0766514	-0.0716082	-0.0735809	-0.0761032	-0.0727136	-0.0746863	-0.0772086
1419.6	-0.000308093	-0.00427778	-0.00134663	0.00252532	0.00101471	-0.00508082	0.00283341	0.0013228	-0.00477272	0.0068031	0.00529249	-0.000803039	0.00387195	0.00236134	-0.00373419	0.07285	0.07461	0.0732	0.07617	0.07793	0.07653	0.0738	0.07557	0.07416	-0.0700166	-0.0732872	-0.0779727	-0.0693669	-0.0726375	-0.077333	-0.0707689	-0.0740495	-0.078735
1420.56	-0.000189274	-0.00390944	-0.00112707	0.00569232	0.0014584	-0.0049168	0.0058816	0.00164768	-0.00472752	0.00960176	0.00536785	-0.00100736	0.00681939	0.00258547	-0.00378973	0.07288	0.07462	0.07322	0.07618	0.07792	0.07652	0.07382	0.07557	0.07416	-0.0669984	-0.0729723	-0.0779475	-0.0665782	-0.0725522	-0.0775274	-0.068007	-0.073991	-0.0789562
1421.53	4.08461e-05	-0.00332359	-0.000443145	0.00849856	0.00175744	-0.00357842	0.00845771	0.00171659	-0.00361926	0.0118221	0.00508103	-0.000254826	0.0089417	0.00220058	-0.00313527	0.07291	0.07464	0.07324	0.07619	0.07791	0.07651	0.07384	0.07557	0.07417	-0.0644523	-0.0729234	-0.0768593	-0.0643679	-0.072829	-0.0767648	-0.0656692	-0.0741403	-0.0780762
1422.49	0.000509518	-0.00247012	0.0010002	0.00939122	0.00199523	-0.000695648	0.0088817	0.00148571	-0.00120517	0.0118613	0.00446534	0.00177447	0.00839102	0.000995029	-0.00169585	0.07294	0.07465	0.07326	0.0762	0.07791	0.07651	0.07386	0.07557	0.07418	-0.0640583	-0.0731643	-0.0744652	-0.0643387	-0.0734447	-0.0747355	-0.0653539	-0.0744599	-0.0757608
1423.46	0.00104944	-0.00162582	0.00251687	0.00942152	0.00255655	0.00273407	0.00837208	0.00150711	0.00168463	0.0110473	0.00418236	0.00435988	0.00690465	3.96729e-05	0.000217191	0.07298	0.07467	0.07328	0.07622	0.07791	0.07652	0.07389	0.07558	0.07419	-0.0646079	-0.0731629	-0.0715954	-0.0651727	-0.0737276	-0.0721601	-0.0658399	-0.0743948	-0.0728273
1424.42	0.00156427	-0.00109699	0.0034717	0.00879028	0.00393314	0.00596106	0.007226	0.00236887	0.00439679	0.00988726	0.00503013	0.00705805	0.00531857	0.00046144	0.00248936	0.07302	0.07469	0.07331	0.07623	0.07791	0.07652	0.07392	0.07559	0.07421	-0.065794	-0.0723211	-0.0689132	-0.0663427	-0.0728799	-0.069462	-0.0667229	-0.07325	-0.0698421
1425.39	0.00196835	-0.000745008	0.00400703	0.00849587	0.00588752	0.00861204	0.00652753	0.00391917	0.00664369	0.00924088	0.00663253	0.00935704	0.00448884	0.00188049	0.004605	0.07306	0.07472	0.07334	0.07626	0.07791	0.07653	0.07395	0.07561	0.07423	-0.0665325	-0.0708008	-0.0666963	-0.0670191	-0.0712775	-0.067173	-0.0670901	-0.0713585	-0.067254
1426.35	0.00213656	-0.000501178	0.00379757	0.0102537	0.00861561	0.00979349	0.00811718	0.00647905	0.00765693	0.0107549	0.00911679	0.0102947	0.00645617	0.00481804	0.00599593	0.07311	0.07475	0.07337	0.07628	0.07792	0.07654	0.07399	0.07562	0.07425	-0.0649928	-0.068271	-0.0657131	-0.0655251	-0.0688032	-0.0662453	-0.0652394	-0.0685075	-0.0659596
1427.31	0.00209081	-0.000462055	0.00361104	0.0121136	0.0113089	0.0103164	0.0100228	0.00921806	0.00822555	0.0125756	0.0117709	0.0107784	0.00850254	0.00769783	0.00670532	0.07316	0.07478	0.07341	0.07631	0.07793	0.07656	0.07403	0.07564	0.07427	-0.0631372	-0.0655619	-0.0651844	-0.0637344	-0.0661591	-0.0657816	-0.0631642	-0.0655789	-0.0652014
[truncated: 385 more rows]

## Sheet: results
		line-1	line-2	line-3	line-4	line-5	line-6	line-7	line-8	line-9	average	s.d. of average
[truncated: 2 more rows]
